# Supplementary material for: Claudin5 protects the peripheral endothelial barrier in an organ and vessel-type-specific manner
Source: eLife journal article supplement (doi:10.7554/elife.78517), 2022-07-21
Supplement: supp [file elife-78517-supp-v1.zip]

Archive with 18 entries (18 files):
- elife_poa_e78517_Figure_1_figure_supplement_1.pdf
- elife_poa_e78517_Figure_1_figure_supplement_2.pdf
- elife_poa_e78517_Figure_1_figure_supplement_3.pdf
- elife_poa_e78517_Figure_1_figure_supplement_4.pdf
- elife_poa_e78517_Figure_1_figure_supplement_5.pdf
- elife_poa_e78517_Figure_2_figure_supplement_1.pdf
- elife_poa_e78517_Figure_3_figure_supplement_1.pdf
- elife_poa_e78517_Figure_4_figure_supplement_1.pdf
- elife_poa_e78517_Figure_5_figure_supplement_1.pdf
- elife_poa_e78517_Source_data_1.zip
- elife_poa_e78517_Figure_1_source_data_1.xlsx
- elife_poa_e78517_Figure_1_source_data_2.xlsx
- elife_poa_e78517_Figure_1_source_data_3.xlsx
- elife_poa_e78517_Figure_1_source_data_4.xlsx
- elife_poa_e78517_Figure_1_source_data_5.xlsx
- elife_poa_e78517_Video_1.avi
- elife_poa_e78517_Video_2.avi
- elife_poa_e78517_Transparent_Reporting_File.pdf
