# Supplementary material for: Claudin5 protects the peripheral endothelial barrier in an organ and vessel-type-specific manner
Source: eLife journal article supplement (doi:10.7554/elife.78517), 2022-07-21

Figure 1-figure supplement 5

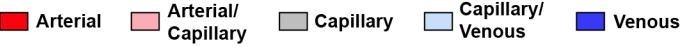

Cadherin genes

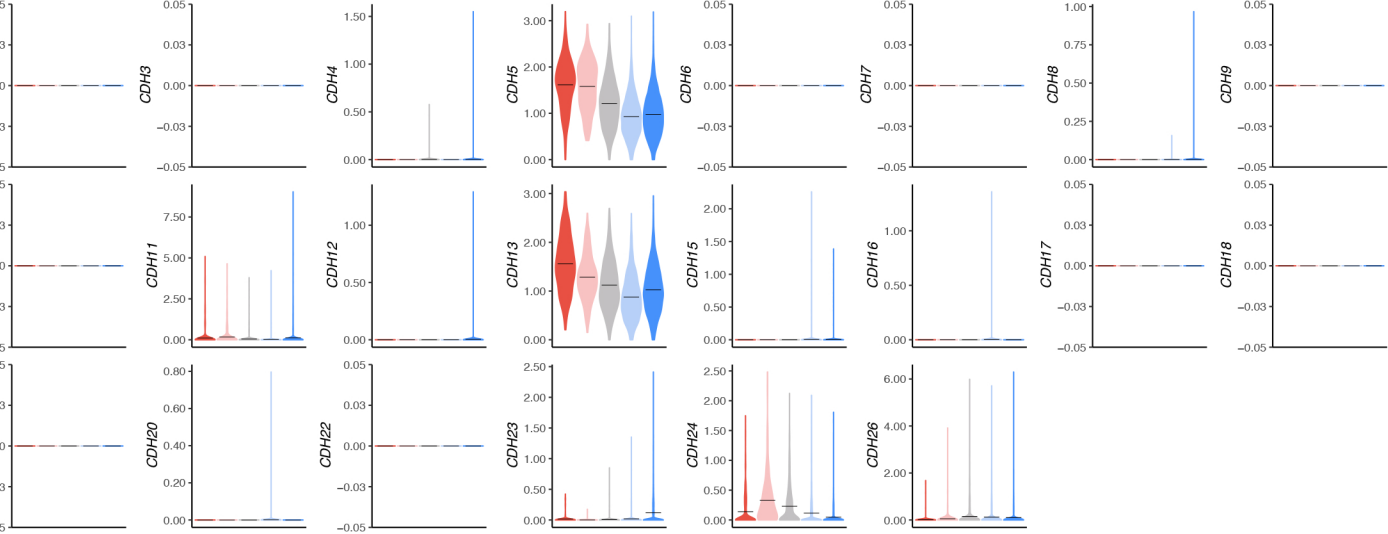

Claudin genes

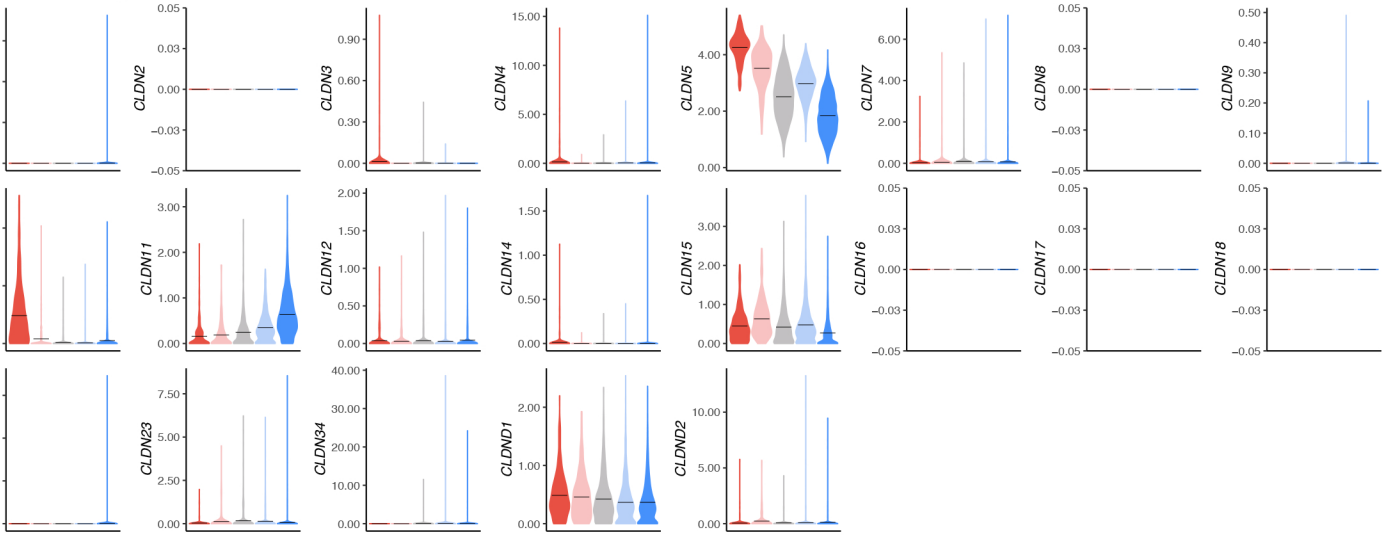

Transmembrane junction genes

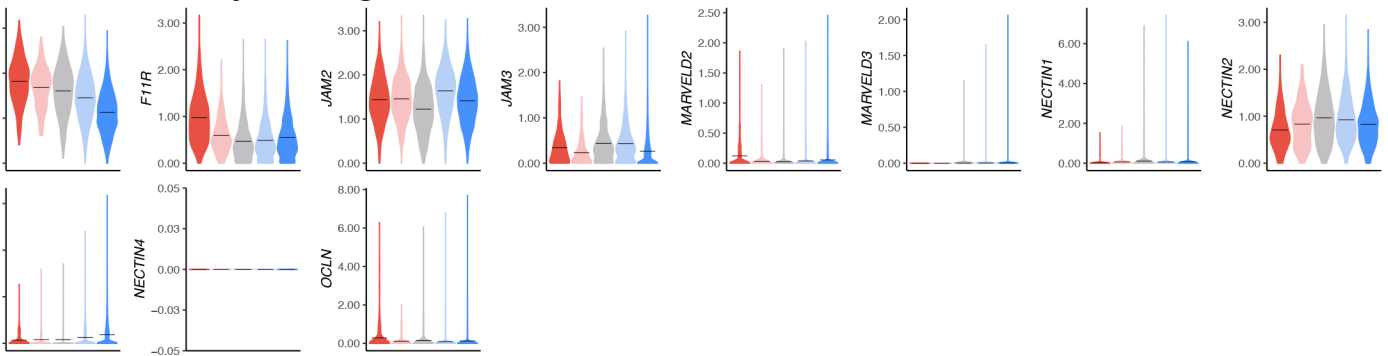

Intracellular junction genes

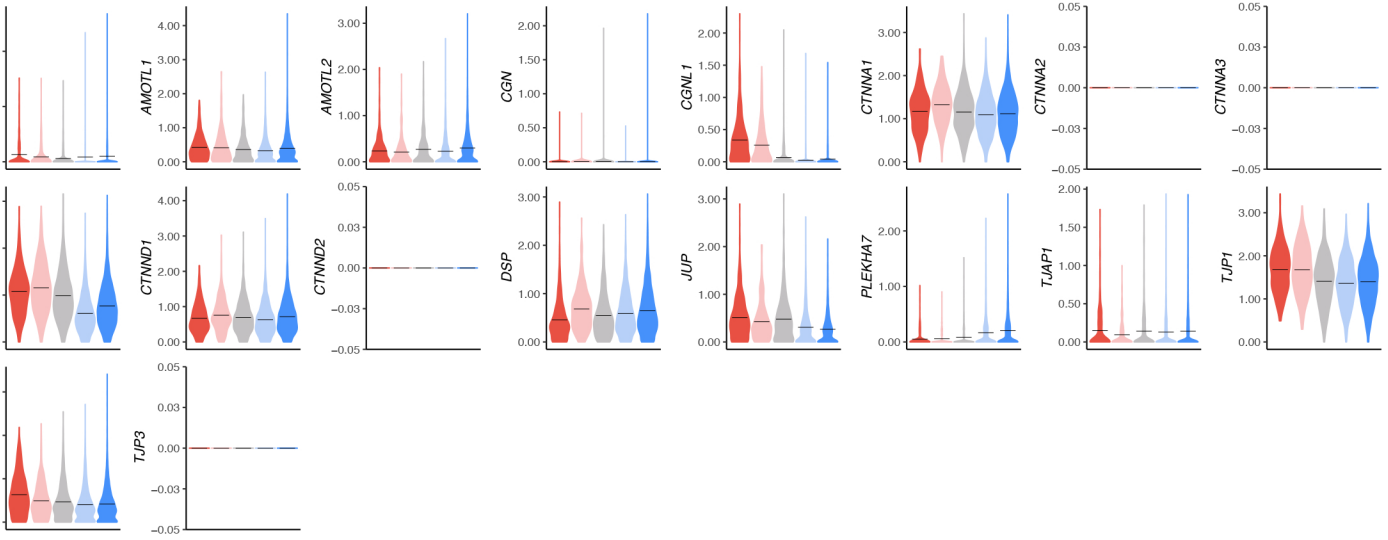

Supplement: supp [file elife-78517-supp-v1.zip › elife_poa_e78517_Figure_1_figure_supplement_5.pdf]
