# Supplementary material for: Claudin5 protects the peripheral endothelial barrier in an organ and vessel-type-specific manner
Source: eLife journal article supplement (doi:10.7554/elife.78517), 2022-07-21
Supplement: supp [file elife-78517-supp-v1.zip › elife_poa_e78517_Figure_1_source_data_3.xlsx]

## Sheet: Artery
Symbol

## Sheet: Artery-Capillary
Symbol

## Sheet: Capillary
Symbol

## Sheet: Capillary-Vein
Symbol

## Sheet: Vein
Symbol
