# Supplementary material for: Claudin5 protects the peripheral endothelial barrier in an organ and vessel-type-specific manner
Source: eLife journal article supplement (doi:10.7554/elife.78517), 2022-07-21
Supplement: supp [file elife-78517-supp-v1.zip › elife_poa_e78517_Figure_1_source_data_5.xlsx]

## Sheet: Artery
Symbol	p_val	avg_log2FC	pct.1	pct.2	p_val_adj
TMEM178A	0	1.02417	0.371	0.011	0
SERPINE2	0	1.16518	0.32	0.01	0
SEMA3G	0	1.54503	0.585	0.037	0
ADRA2C	0	0.980762	0.371	0.013	0
IGFBP3	0	3.79672	0.791	0.08	0
PCSK5	0	1.11057	0.412	0.018	0
CXCL12	0	2.44818	0.768	0.102	0
FBLN5	0	1.10796	0.399	0.016	0
KRT19	0	1.02327	0.345	0.01	0
PPP1R14A	1.54493e-278	0.800491	0.26	0.008	5.65461e-274
HEY1	6.10137e-268	1.25108	0.505	0.049	2.23316e-263
NEBL	2.00102e-242	1.07731	0.436	0.039	7.32395e-238
GJA5	1.72454e-236	0.607981	0.198	0.004	6.31197e-232
FN1	1.03311e-233	2.60982	0.613	0.097	3.78129e-229
FBLIM1	1.01836e-232	0.540321	0.193	0.004	3.7273e-228
IRF6	1.68608e-224	0.46873	0.173	0.003	6.17123e-220
JAG1	1.18429e-214	1.87494	0.724	0.155	4.33461e-210
EMP3	2.68908e-214	1.42971	0.541	0.076	9.8423e-210
HEY2	2.44872e-208	0.423273	0.175	0.004	8.96254e-204
SRGN	2.24243e-206	2.37559	0.892	0.314	8.20751e-202
AC004947.1	1.97944e-197	0.51589	0.186	0.005	7.24494e-193
LINC00639	1.50822e-195	0.487881	0.188	0.006	5.52023e-191
ARL15	1.736e-192	1.48162	0.613	0.115	6.35393e-188
MMP2	1.15306e-191	0.876579	0.369	0.036	4.22031e-187
HES4	2.43907e-186	1.28817	0.487	0.069	8.92725e-182
CCL14	2.98189e-185	-3.64021	0.768	0.982	1.0914e-180
ATP2A3	5.99331e-179	1.01922	0.41	0.049	2.19361e-174
ACKR1	2.64752e-174	-3.5467	0.515	0.941	9.6902e-170
SRP14	1.93748e-173	2.12348	1	0.971	7.09138e-169
C19orf33	1.06479e-172	1.68586	0.647	0.144	3.89722e-168
GJA4	2.30985e-172	1.39093	0.51	0.083	8.45429e-168
TPT1	2.3829e-162	-1.41697	1	1	8.72166e-158
PLLP	3.56383e-156	0.963788	0.436	0.066	1.3044e-151
AQP1	7.4721e-149	-2.24854	0.624	0.951	2.73486e-144
LINC00840	7.60379e-149	0.367064	0.152	0.005	2.78306e-144
CLDN5	7.90746e-144	2.09865	0.995	0.86	2.89421e-139
PLPP1	3.66377e-142	1.75531	0.683	0.2	1.34098e-137
PRDM16	1.78459e-139	0.392041	0.162	0.007	6.53179e-135
FGF18	3.72977e-134	0.450225	0.188	0.011	1.36513e-129
SOX17	2.91432e-132	1.54519	0.634	0.17	1.06667e-127
SYT1	3.14454e-128	0.861521	0.278	0.03	1.15093e-123
PRDM16-DT	1.5837e-126	0.369226	0.134	0.005	5.79648e-122
RPS2	1.33416e-125	-1.27254	1	0.999	4.88315e-121
RPL37	1.02478e-121	-1.11772	1	0.999	3.75078e-117
SPECC1	1.87193e-121	0.668916	0.286	0.034	6.85145e-117
COL8A1	1.17222e-120	0.370412	0.119	0.004	4.29043e-116
RPS18	1.20353e-120	-1.13778	0.997	1	4.40503e-116
DKK2	1.76105e-120	0.289772	0.09	0.001	6.44563e-116
RHOB	8.13621e-120	1.92838	0.832	0.396	2.97793e-115
KCNJ2	4.76208e-119	0.449204	0.16	0.009	1.74297e-114
CLDN10	8.15834e-119	0.470588	0.175	0.011	2.98603e-114
FAM89A	4.24437e-118	0.733666	0.351	0.053	1.55348e-113
ICAM2	1.35267e-117	1.64443	0.825	0.4	4.95092e-113
RPL34	2.51161e-116	-1.03039	1	1	9.19275e-112
SULF1	7.59827e-116	1.31884	0.626	0.184	2.78104e-111
RPL10	4.02908e-114	-1.08356	1	1	1.47469e-109
CLMN	1.56639e-113	0.403332	0.18	0.013	5.73314e-109
TMEM100	1.99238e-112	0.67688	0.211	0.019	7.29232e-108
EFNB2	1.54445e-110	1.47353	0.66	0.225	5.65283e-106
SLC9A3R2	8.61609e-110	1.89822	0.92	0.596	3.15357e-105
RPL32	2.1535e-109	-1.08994	1	0.999	7.88202e-105
IGFBP7	6.07713e-109	-1.50749	0.853	0.977	2.22429e-104
RPL26	1.66151e-108	-1.07479	0.995	0.999	6.08128e-104
SAT1	1.0995e-107	2.45914	0.946	0.709	4.02429e-103
GUCY1A1	4.25505e-103	0.866931	0.407	0.082	1.55739e-98
RPS14	2.10059e-99	-0.972502	1	1	7.68837e-95
RPS6	3.38008e-99	-1.05017	0.995	0.998	1.23714e-94
VWF	3.65658e-99	-1.9465	0.454	0.866	1.33834e-94
RPS23	1.34275e-98	-0.968056	0.997	0.999	4.9146e-94
JAG2	3.00478e-97	1.06798	0.521	0.142	1.09978e-92
NOTCH4	1.52234e-96	0.895178	0.438	0.101	5.57193e-92
RAMP3	5.67401e-94	-1.87777	0.211	0.731	2.07674e-89
RPS21	3.42397e-92	-0.991049	0.99	0.997	1.25321e-87
LTBP4	1.69602e-91	1.23587	0.58	0.188	6.20761e-87
ANK1	5.53342e-90	0.262357	0.119	0.007	2.02529e-85
RPL13	3.62609e-89	-0.868493	1	1	1.32719e-84
BST2	1.69325e-88	1.37429	0.809	0.395	6.19748e-84
PRRT1	2.31331e-88	0.355011	0.134	0.009	8.46694e-84
PLVAP	2.13307e-87	-1.66248	0.291	0.763	7.80725e-83
RPS15A	2.88287e-87	-0.951665	0.992	0.999	1.05516e-82
CST3	1.25615e-86	-1.21151	0.959	0.987	4.59764e-82
PTGER4	2.00974e-86	0.472296	0.193	0.021	7.35583e-82
LGALS3BP	2.91795e-86	0.348098	0.139	0.01	1.068e-81
CP	6.07491e-86	0.308336	0.137	0.01	2.22348e-81
CHRM3	1.44893e-85	0.371071	0.152	0.013	5.30321e-81
CD44	2.45666e-85	0.177564	0.075	0.002	8.99164e-81
RPL12	3.88875e-85	-0.997082	0.997	0.998	1.42332e-80
RPL11	5.79849e-85	-0.867645	1	0.999	2.12231e-80
RPS4X	6.54566e-85	-0.971652	0.982	0.996	2.39578e-80
DST	6.65778e-85	1.02204	0.497	0.145	2.43681e-80
RPL36A	3.23793e-84	-1.01045	0.972	0.995	1.18512e-79
AC004889.1	3.49202e-83	0.608642	0.26	0.041	1.27811e-78
S100A4	3.89026e-82	1.53597	0.941	0.701	1.42387e-77
RPS12	1.21952e-81	-0.831165	0.997	1	4.46358e-77
KCNN3	2.91273e-81	0.800885	0.438	0.114	1.06609e-76
ADAMTS6	3.42227e-81	0.805796	0.322	0.065	1.25259e-76
NSG1	1.16966e-80	0.160558	0.064	0.001	4.28106e-76
COL1A2	1.2717e-80	0.198023	0.064	0.001	4.65457e-76
ADIRF	1.80973e-80	-1.19151	0.972	0.993	6.62378e-76
RPS19	2.16001e-80	-0.910935	1	0.999	7.90585e-76
GLIPR2	5.869e-80	0.335671	0.152	0.014	2.14811e-75
C4orf48	7.08017e-80	0.582555	0.235	0.035	2.59141e-75
SLC16A14	3.68329e-79	0.48838	0.235	0.035	1.34812e-74
GPRIN3	7.56355e-79	0.245663	0.09	0.004	2.76833e-74
AC004540.2	9.57919e-79	0.787674	0.425	0.111	3.50608e-74
ITM2B	1.55837e-78	-0.995953	0.99	0.995	5.7038e-74
NRXN1	1.78276e-77	0.151222	0.059	0.001	6.52509e-73
RPL39	8.0425e-77	-0.879516	0.995	0.998	2.94364e-72
MAP1B	8.90781e-77	0.475235	0.201	0.026	3.26035e-72
RPS3	1.03739e-76	-0.939873	0.985	0.993	3.79696e-72
RPS8	1.17733e-76	-0.819928	1	1	4.30915e-72
PIM3	7.88532e-76	-1.51356	0.173	0.658	2.8861e-71
RPL41	9.609e-76	-0.77721	1	1	3.51699e-71
RPL17	3.23114e-75	-0.905183	0.99	0.993	1.18263e-70
RPL5	3.63074e-75	-0.92946	0.987	0.992	1.32889e-70
NPR3	8.63956e-75	0.492248	0.168	0.019	3.16216e-70
ADORA2A	1.53041e-74	0.262585	0.101	0.006	5.60146e-70
RPL19	7.39706e-74	-0.83944	0.995	0.998	2.7074e-69
RPLP1	2.05102e-73	-0.745203	1	1	7.50694e-69
NACA	2.91964e-73	-0.902413	0.99	0.993	1.06862e-68
RPL7A	3.90786e-73	-0.884242	0.985	0.995	1.43032e-68
RPL10A	6.64417e-73	-0.925068	0.985	0.99	2.43183e-68
RPL30	2.76602e-72	-0.797823	1	0.999	1.01239e-67
CD74	2.90114e-71	-1.15431	0.974	0.992	1.06185e-66
SOX5	1.57302e-70	0.280459	0.108	0.008	5.75741e-66
IGFBP4	1.85961e-70	-1.30778	0.696	0.893	6.80636e-66
A2M	3.29076e-70	1.05578	0.961	0.732	1.20445e-65
SCIN	1.18823e-69	0.190623	0.067	0.002	4.34904e-65
RPL35A	4.6904e-69	-0.818014	0.987	0.998	1.71673e-64
RPS3A	5.54352e-69	-0.854667	0.987	0.997	2.02898e-64
RPL3	5.97179e-69	-0.802541	0.997	0.999	2.18573e-64
RPS27A	1.82375e-68	-0.753696	0.997	0.999	6.67511e-64
RPS24	4.61164e-68	-0.777395	1	0.999	1.68791e-63
COL21A1	1.36499e-67	0.541766	0.25	0.046	4.99602e-63
KCNJ2-AS1	2.0972e-67	0.291066	0.119	0.01	7.67596e-63
TMEM47	3.30484e-67	0.494232	0.224	0.037	1.20961e-62
RPL7	2.52204e-66	-0.914434	0.943	0.982	9.23093e-62
SPARCL1	3.5665e-66	-0.927413	0.997	0.998	1.30537e-61
UTRN	2.27199e-65	1.1908	0.781	0.451	8.31573e-61
ADGRF5	7.34907e-65	1.01826	0.647	0.293	2.68983e-60
GAS5	4.64332e-64	-1.15086	0.539	0.846	1.6995e-59
RPL15	5.7079e-64	-0.804912	0.977	0.989	2.08915e-59
FILIP1	1.80282e-63	0.864437	0.358	0.094	6.59849e-59
RPL28	1.23474e-62	-0.771664	0.992	0.998	4.51926e-58
H19	1.23962e-62	0.865942	0.137	0.015	4.53712e-58
HLA-DRA	2.75323e-62	-1.38109	0.719	0.913	1.00771e-57
SYNJ2	3.83678e-62	0.573083	0.309	0.073	1.4043e-57
MT-CO3	2.85284e-61	-1.0581	0.977	0.994	1.04417e-56
ENPP2	2.963e-61	1.46028	0.716	0.396	1.08449e-56
EEF1A1	3.9631e-61	-0.627052	1	1	1.45054e-56
RPS9	6.55523e-61	-0.793369	0.992	0.995	2.39928e-56
CLIC5	6.64428e-61	0.39622	0.144	0.017	2.43187e-56
MT-ND2	1.30209e-60	-1.05549	0.974	0.995	4.76579e-56
RPL6	6.80843e-60	-0.806362	0.99	0.994	2.49195e-55
NR2F2	8.58427e-59	-1.42692	0.175	0.601	3.14193e-54
LPCAT2	4.5803e-58	0.869789	0.5	0.192	1.67643e-53
GAPDH	8.35478e-58	-0.909626	0.938	0.976	3.05793e-53
PIK3C2B	9.19193e-58	0.687373	0.363	0.104	3.36434e-53
PPA1	1.21533e-57	1.1683	0.784	0.494	4.44823e-53
THSD4	2.79703e-57	0.287621	0.129	0.014	1.02374e-52
FAM107A	3.056e-57	0.7605	0.43	0.14	1.11853e-52
CRIP1	5.92266e-57	1.50001	0.887	0.717	2.16775e-52
ACTG1	6.07912e-57	-0.992402	0.928	0.976	2.22502e-52
SLC25A34-AS1	1.22241e-56	0.112017	0.034	0	4.47415e-52
DEPP1	1.37777e-56	1.71938	0.696	0.406	5.04279e-52
PODXL	2.0513e-56	1.04706	0.701	0.378	7.50795e-52
CAP2	3.9774e-55	0.181694	0.082	0.006	1.45577e-50
ITM2A	5.08492e-55	-1.31729	0.314	0.691	1.86113e-50
EGFL8	7.91644e-55	0.495412	0.198	0.036	2.8975e-50
IMPG2	1.09774e-54	0.135655	0.057	0.002	4.01784e-50
TM4SF1	2.35859e-54	0.808453	0.961	0.891	8.63267e-50
PRCP	3.39505e-54	-1.25667	0.198	0.587	1.24262e-49
RPL21	3.44003e-54	-0.682707	1	0.996	1.25909e-49
TOX2	9.16432e-54	0.46653	0.222	0.044	3.35423e-49
TSPAN2	1.01385e-53	0.888446	0.557	0.238	3.71078e-49
KAZALD1	1.31349e-53	0.195103	0.072	0.004	4.80749e-49
FAM110D	1.63892e-53	-1.2597	0.147	0.548	5.99861e-49
TGFBR3	7.29237e-53	-1.16011	0.119	0.541	2.66908e-48
FHL1	1.0715e-52	0.70992	0.369	0.113	3.9218e-48
PDCD4	1.18288e-52	1.17848	0.742	0.473	4.32947e-48
RACK1	2.82355e-51	-0.798474	0.923	0.974	1.03345e-46
RGS10	1.07628e-50	0.160939	0.08	0.006	3.93928e-46
CGNL1	1.23791e-50	0.258169	0.124	0.015	4.53086e-46
AKR1B1	1.56366e-50	0.490299	0.245	0.056	5.72316e-46
DGKI	3.18978e-50	0.130256	0.049	0.002	1.16749e-45
RPL29	9.30821e-50	-0.719879	0.987	0.995	3.4069e-45
SNHG29	1.06709e-49	-0.988441	0.786	0.898	3.90565e-45
RPL24	1.09313e-49	-0.69278	0.974	0.992	4.00097e-45
S100A10	1.43642e-49	-0.864881	0.954	0.991	5.25745e-45
RPS15	2.79435e-49	-0.664456	0.995	0.997	1.02276e-44
RPLP0	3.26198e-49	-0.828563	0.969	0.978	1.19392e-44
CFH	4.29025e-49	0.774884	0.389	0.132	1.57028e-44
RPL38	2.4763e-48	-0.699416	0.979	0.989	9.0635e-44
CLU	9.7441e-48	-1.45995	0.972	0.979	3.56644e-43
RPL37A	1.46509e-47	-0.584573	0.995	0.998	5.36236e-43
COL15A1	9.46638e-47	-1.23638	0.067	0.446	3.46479e-42
KCNN4	1.23323e-46	0.241469	0.113	0.014	4.51376e-42
MECOM	2.81319e-46	0.977337	0.711	0.433	1.02966e-41
IGF2	3.05475e-46	0.407639	0.173	0.031	1.11807e-41
RPL14	3.16912e-46	-0.689653	0.972	0.99	1.15993e-41
FUT8	3.67796e-46	0.461692	0.201	0.042	1.34617e-41
IL13RA2	4.70798e-46	0.160274	0.052	0.002	1.72317e-41
IL1R1	4.8874e-46	-1.13176	0.095	0.468	1.78884e-41
RPL18A	8.3079e-46	-0.638486	0.992	0.995	3.04077e-41
SYT11	8.38455e-46	0.37307	0.196	0.04	3.06883e-41
MT-CYB	1.04804e-45	-0.848336	0.982	0.997	3.83594e-41
TSC22D1	1.69084e-45	0.928231	0.742	0.456	6.18863e-41
SLC12A2	1.98109e-45	0.540565	0.227	0.053	7.25099e-41
RPS7	4.07245e-45	-0.692741	0.985	0.992	1.49056e-40
CCN1	5.74221e-45	1.4758	0.559	0.281	2.10171e-40
RPS25	6.8215e-45	-0.654229	0.992	0.995	2.49674e-40
RPS29	7.42838e-45	-0.593714	0.992	0.998	2.71886e-40
RPL9	1.07906e-44	-0.635439	0.992	0.993	3.94948e-40
SPARC	1.27826e-44	-1.00733	0.492	0.778	4.67858e-40
RPS13	1.47604e-44	-0.624525	0.992	0.995	5.40246e-40
SSUH2	1.58782e-44	0.321588	0.064	0.004	5.81159e-40
IER3	1.75993e-44	-1.96071	0.482	0.728	6.4415e-40
RPL35	1.97502e-44	-0.644051	0.992	0.994	7.22877e-40
NPTN	2.68175e-44	0.522053	0.314	0.095	9.81548e-40
CD34	2.74446e-44	-0.953731	0.755	0.879	1.0045e-39
MAST4	4.98543e-44	0.642372	0.381	0.135	1.82472e-39
DAAM1	1.29769e-43	-1.24339	0.255	0.595	4.74966e-39
IFI6	1.39539e-43	1.01955	0.683	0.388	5.10726e-39
EEF1B2	1.46808e-43	-0.876059	0.848	0.927	5.37333e-39
RPL18	4.32771e-43	-0.63198	0.992	0.994	1.58399e-38
NPNT	5.34221e-43	0.229108	0.106	0.013	1.9553e-38
MMRN1	6.0185e-43	-1.18891	0.294	0.619	2.20283e-38
TMSB4X	7.94358e-43	-0.638687	1	1	2.90743e-38
NOSTRIN	1.04558e-42	-1.04668	0.139	0.508	3.82692e-38
MT-ND1	1.14173e-42	-0.874872	0.943	0.989	4.17883e-38
RPS27	1.20405e-42	-0.526931	1	1	4.40696e-38
STMN1	1.3563e-42	0.779152	0.466	0.203	4.96419e-38
MAP4K3-DT	1.41157e-42	0.523982	0.294	0.087	5.16649e-38
ANXA3	1.57021e-42	0.439625	0.216	0.051	5.74711e-38
ACE	4.76068e-42	0.883943	0.531	0.253	1.74245e-37
SYNPO	5.50332e-42	0.710292	0.438	0.174	2.01427e-37
SPINT2	6.18425e-42	0.194901	0.072	0.006	2.2635e-37
RPS20	7.17808e-42	-0.706975	0.946	0.983	2.62725e-37
ZEB2	1.01629e-41	0.353139	0.178	0.036	3.71972e-37
RPL8	1.43577e-41	-0.626109	0.997	0.998	5.25508e-37
RPL13A	1.90782e-41	-0.611951	0.99	0.995	6.98282e-37
RPL36	2.20024e-41	-0.620494	1	0.993	8.05309e-37
SPHK1	3.81526e-41	-0.972895	0.103	0.456	1.39642e-36
ID4	4.38042e-41	0.14015	0.057	0.003	1.60328e-36
OCIAD2	5.64667e-41	0.834988	0.572	0.299	2.06674e-36
ISG15	5.98596e-41	1.29032	0.637	0.362	2.19092e-36
RAMP2	6.60392e-41	0.742947	0.977	0.879	2.4171e-36
MT-CO1	7.39776e-41	-0.797886	0.974	0.995	2.70765e-36
RPL31	1.4053e-40	-0.736115	0.907	0.958	5.14353e-36
DUSP1	1.64184e-40	1.0341	0.93	0.851	6.0093e-36
NFIX	2.15142e-40	0.390025	0.289	0.086	7.87443e-36
ITSN2	2.26518e-40	0.608359	0.356	0.125	8.29077e-36
COBLL1	3.40293e-40	0.731217	0.495	0.228	1.24551e-35
CRYBG3	3.81447e-40	1.00571	0.616	0.346	1.39614e-35
CEBPD	5.011e-40	-1.13173	0.242	0.582	1.83408e-35
IL32	5.23322e-40	0.759705	0.433	0.178	1.91541e-35
EPAS1	8.57627e-40	0.804784	0.845	0.631	3.139e-35
PERP	9.31465e-40	-1.10223	0.129	0.481	3.40925e-35
RHOC	1.16709e-39	0.843809	0.812	0.581	4.27166e-35
RPS17	3.22281e-39	-0.717354	0.941	0.973	1.17958e-34
XG	3.92455e-39	0.179412	0.062	0.005	1.43642e-34
CCN3	1.09131e-38	0.267455	0.101	0.013	3.9943e-34
EEF1G	1.32589e-38	-0.742755	0.881	0.946	4.85288e-34
MT-CO2	2.68897e-38	-0.76896	0.977	0.996	9.84189e-34
RPS5	6.32447e-38	-0.682678	0.964	0.981	2.31482e-33
RGS3	1.02842e-37	0.514069	0.317	0.107	3.76412e-33
NPC2	1.03722e-37	-0.903434	0.428	0.706	3.79634e-33
TM6SF1	1.36213e-37	0.440136	0.247	0.07	4.98553e-33
CFAP36	1.49901e-37	0.780097	0.518	0.256	5.48652e-33
ATP13A3	2.38535e-37	0.464914	0.188	0.044	8.73061e-33
ZFP36L2	2.62524e-37	-0.979012	0.665	0.831	9.60866e-33
STOM	3.26839e-37	0.717447	0.817	0.576	1.19626e-32
ENG	3.34291e-37	-0.963848	0.598	0.806	1.22354e-32
SLC2A3	5.43375e-37	-1.05505	0.165	0.498	1.98881e-32
CRISPLD1	6.27378e-37	0.11133	0.052	0.003	2.29627e-32
DUSP23	1.01684e-36	-1.01864	0.229	0.542	3.72175e-32
LDHA	1.19008e-36	-0.837993	0.631	0.817	4.35581e-32
RRAS	1.86869e-36	0.668865	0.518	0.257	6.83958e-32
CD81	3.89386e-36	0.82685	0.928	0.833	1.42519e-31
MT-ATP6	4.72664e-36	-0.815482	0.995	0.995	1.73e-31
HLA-DPA1	4.96158e-36	-1.02829	0.51	0.748	1.81599e-31
POLN	7.876e-36	0.13827	0.046	0.003	2.88269e-31
RPS6KA5	9.87824e-36	0.522776	0.304	0.103	3.61553e-31
TNFRSF19	1.15861e-35	0.109071	0.039	0.002	4.24064e-31
CD9	2.53135e-35	0.732482	0.943	0.827	9.265e-31
RPLP2	3.29705e-35	-0.513557	0.995	0.997	1.20675e-30
SEMA7A	1.19838e-34	0.119426	0.054	0.004	4.38617e-30
NOP53	3.56803e-34	-0.754172	0.711	0.857	1.30594e-29
TRIM7	5.75727e-34	0.164517	0.085	0.011	2.10722e-29
CRIP2	5.84753e-34	0.778094	0.892	0.79	2.14025e-29
FAU	8.13486e-34	-0.545513	0.99	0.995	2.97744e-29
SNHG5	1.20159e-33	-0.74227	0.619	0.807	4.39794e-29
OR2A1-AS1	1.26561e-33	0.214242	0.09	0.012	4.63227e-29
NME2	1.32019e-33	-0.696808	0.879	0.935	4.83202e-29
CHRM3-AS2	1.41892e-33	0.122182	0.036	0.001	5.1934e-29
PREX1	1.78239e-33	0.37126	0.162	0.037	6.52371e-29
GLUL	1.94014e-33	0.986684	0.747	0.534	7.10109e-29
RPL23A	2.1119e-33	-0.610261	0.959	0.975	7.72975e-29
IFI27	3.39549e-33	0.69392	0.995	0.976	1.24278e-28
VEGFC	3.81484e-33	0.573886	0.358	0.141	1.39627e-28
RPL22	3.90014e-33	-0.553651	0.982	0.992	1.42749e-28
GCNT2	4.76214e-33	0.326109	0.175	0.042	1.74299e-28
CAV1	1.18762e-32	0.621245	0.972	0.964	4.34679e-28
AIF1L	2.06756e-32	0.359473	0.219	0.062	7.56748e-28
SNCG	2.73245e-32	-0.925257	0.348	0.628	1.0001e-27
THSD7A	3.48362e-32	0.821682	0.487	0.246	1.27504e-27
ETS2	4.30413e-32	-0.809174	0.348	0.634	1.57536e-27
IFI27L2	5.93062e-32	0.54618	0.361	0.145	2.17067e-27
SSTR1	5.99786e-32	0.209128	0.059	0.005	2.19528e-27
RPL23	7.73916e-32	-0.59174	0.961	0.976	2.83261e-27
PLCG2	9.24996e-32	0.407883	0.258	0.084	3.38558e-27
DHH	9.55208e-32	0.23464	0.103	0.017	3.49616e-27
PLS3	4.37033e-31	0.729858	0.608	0.353	1.59959e-26
RAPGEF5	8.458e-31	0.604803	0.384	0.168	3.09571e-26
ATP1B3	1.21704e-30	0.810146	0.601	0.364	4.45449e-26
OLFM1	1.46897e-30	-0.849825	0.072	0.35	5.37657e-26
CDC42BPA	2.47161e-30	0.583345	0.402	0.18	9.04633e-26
HSPA2	2.94856e-30	0.569687	0.43	0.203	1.0792e-25
NES	3.65862e-30	0.455255	0.26	0.088	1.33909e-25
TUSC3	3.6754e-30	0.367111	0.237	0.075	1.34523e-25
HSD17B12	3.78403e-30	0.677109	0.582	0.337	1.38499e-25
RPL27A	8.32802e-30	-0.532155	0.992	0.989	3.04814e-25
ZFAS1	1.08304e-29	-0.763646	0.554	0.758	3.96405e-25
BTNL9	1.19907e-29	0.32652	0.152	0.036	4.38872e-25
GMFG	1.36014e-29	-0.785286	0.111	0.403	4.97824e-25
LTC4S	1.64574e-29	0.801566	0.397	0.185	6.02358e-25
SOX13	1.67019e-29	0.401583	0.25	0.084	6.11306e-25
DIPK1C	1.67354e-29	0.102632	0.046	0.003	6.12534e-25
PDGFD	2.69226e-29	0.315904	0.168	0.043	9.85393e-25
SELENOM	2.84474e-29	0.710974	0.771	0.55	1.0412e-24
RPS28	3.8282e-29	-0.452342	1	1	1.40116e-24
NOS1AP	4.02055e-29	0.204266	0.103	0.018	1.47156e-24
DLL4	4.43477e-29	0.463999	0.299	0.113	1.62317e-24
SELP	5.3088e-29	-0.798104	0.054	0.325	1.94307e-24
MT-ND3	5.98779e-29	-0.675425	0.972	0.994	2.19159e-24
SCARB1	7.45169e-29	-0.784068	0.049	0.319	2.72739e-24
PLCD3	1.10745e-28	0.286424	0.149	0.036	4.05339e-24
PDIA5	1.88952e-28	-0.734946	0.057	0.32	6.91583e-24
NCOA7	2.08025e-28	-0.892648	0.258	0.53	7.61391e-24
HLA-DRB1	4.10938e-28	-0.794507	0.822	0.929	1.50408e-23
MSX1	6.87871e-28	0.4712	0.255	0.089	2.51768e-23
CYBA	8.34394e-28	0.340142	0.253	0.086	3.05396e-23
NR4A1	8.64995e-28	0.757138	0.369	0.162	3.16597e-23
KCTD12	1.99752e-27	0.853234	0.858	0.747	7.31114e-23
CDK14	2.10339e-27	0.116792	0.049	0.004	7.69864e-23
ALPL	5.73456e-27	0.372813	0.111	0.022	2.0989e-22
PABPC1	7.58483e-27	-0.721063	0.619	0.786	2.77612e-22
PTPRG	1.20367e-26	0.454104	0.211	0.068	4.40555e-22
CPVL	1.34001e-26	-0.71391	0.054	0.313	4.90457e-22
RPL27	2.43347e-26	-0.535521	0.956	0.969	8.90673e-22
TLE5	2.80308e-26	0.676254	0.601	0.377	1.02596e-21
NUPR1	3.96637e-26	-0.796237	0.126	0.392	1.45173e-21
MEOX1	4.73546e-26	-0.764881	0.108	0.371	1.73322e-21
MPPED2	5.16011e-26	0.101324	0.054	0.006	1.88865e-21
AFAP1L2	5.95851e-26	0.336285	0.219	0.073	2.18087e-21
RPS10	6.09577e-26	-0.583116	0.954	0.969	2.23111e-21
CTTNBP2NL	2.35119e-25	0.549562	0.464	0.244	8.60558e-21
STC1	3.22048e-25	0.60703	0.281	0.11	1.17873e-20
RAB13	3.54207e-25	-0.742985	0.515	0.722	1.29643e-20
PRKX	4.85932e-25	0.2711	0.144	0.037	1.77856e-20
PRSS23	5.1963e-25	-0.885117	0.168	0.419	1.9019e-20
MARCKS	5.74429e-25	-0.78451	0.168	0.427	2.10247e-20
BLOC1S5	1.1567e-24	0.475174	0.322	0.139	4.23364e-20
GFOD1	1.7645e-24	0.547414	0.353	0.163	6.45824e-20
CLEC14A	2.23562e-24	0.676151	0.892	0.817	8.18261e-20
TSHZ2	2.28848e-24	-0.811737	0.309	0.559	8.37608e-20
PELI1	2.83497e-24	0.409596	0.224	0.08	1.03763e-19
TIMP3	4.32774e-24	0.745755	0.915	0.814	1.584e-19
ITGB5	6.13006e-24	0.273296	0.126	0.03	2.24366e-19
TGFBR2	7.25977e-24	-0.651672	0.683	0.822	2.65715e-19
TOX	8.53988e-24	0.123445	0.046	0.005	3.12568e-19
PPT2	1.01261e-23	0.255753	0.124	0.03	3.70626e-19
LGALS3	1.02498e-23	-0.568959	0.946	0.967	3.75155e-19
LIFR	1.4345e-23	-0.857914	0.412	0.631	5.25042e-19
GUCY1B1	2.16809e-23	0.235449	0.106	0.023	7.93544e-19
TFPI	2.56123e-23	-0.721089	0.425	0.649	9.37434e-19
MRPL33	2.63192e-23	0.6569	0.665	0.468	9.6331e-19
MYLK	3.85716e-23	-0.657174	0.111	0.355	1.41176e-18
PTP4A3	4.01306e-23	0.357189	0.201	0.068	1.46882e-18
LGALS1	4.14364e-23	0.634924	0.629	0.41	1.51661e-18
LTBP1	4.47849e-23	0.371779	0.232	0.086	1.63917e-18
CD46	5.37912e-23	0.555962	0.544	0.329	1.96881e-18
PDE2A	5.77848e-23	-0.614556	0.082	0.325	2.11498e-18
TSPAN7	6.63451e-23	-0.685741	0.459	0.667	2.4283e-18
RNF144B	7.78484e-23	0.314811	0.211	0.073	2.84933e-18
ACTN1	9.20919e-23	-0.72609	0.299	0.537	3.37065e-18
ARHGEF5	1.06745e-22	0.109369	0.062	0.009	3.90698e-18
DBNDD2	1.07663e-22	0.39153	0.26	0.104	3.94056e-18
TPD52L1	1.15183e-22	-0.624221	0.062	0.292	4.21582e-18
ADAMTS1	1.73697e-22	1.00257	0.495	0.292	6.35749e-18
LAPTM5	2.00345e-22	0.432735	0.271	0.112	7.33281e-18
CCL23	2.0354e-22	-0.939996	0.039	0.256	7.44976e-18
VCAM1	3.70555e-22	0.25646	0.098	0.021	1.35627e-17
FXYD6	3.80223e-22	0.32668	0.162	0.049	1.39165e-17
GSTT2B	4.2098e-22	0.17368	0.072	0.012	1.54083e-17
SNHG6	4.67457e-22	-0.627491	0.611	0.772	1.71094e-17
CDA	7.62328e-22	0.261068	0.139	0.038	2.7902e-17
CX3CL1	8.02565e-22	0.427659	0.178	0.058	2.93747e-17
NUDT14	1.03604e-21	0.46029	0.376	0.189	3.79201e-17
COTL1	1.06464e-21	-0.586006	0.049	0.27	3.89668e-17
RBMS3	1.07489e-21	0.408847	0.296	0.128	3.9342e-17
CTHRC1	1.12608e-21	-0.666096	0.088	0.319	4.12158e-17
OSBPL1A	1.25402e-21	-0.682541	0.196	0.439	4.58982e-17
DYNLT3	1.30053e-21	0.335802	0.198	0.069	4.76005e-17
WNT4	1.37797e-21	0.251386	0.101	0.022	5.04352e-17
GAS6	1.55094e-21	0.500054	0.51	0.294	5.67659e-17
PALMD	1.55496e-21	0.624626	0.838	0.723	5.69131e-17
CALD1	1.75113e-21	0.754254	0.698	0.521	6.40932e-17
PRXL2A	1.98626e-21	-0.720651	0.304	0.527	7.2699e-17
AKR1C1	3.03723e-21	-0.903875	0.188	0.414	1.11166e-16
FAM13C	3.8026e-21	-0.743267	0.119	0.349	1.39179e-16
BMP6	4.26943e-21	0.596279	0.335	0.161	1.56265e-16
RPL4	5.05108e-21	-0.554751	0.807	0.885	1.84874e-16
SH3BP5	7.01416e-21	-0.718714	0.399	0.598	2.56725e-16
BGN	7.92628e-21	0.319455	0.111	0.027	2.9011e-16
KYNU	9.2325e-21	0.10766	0.041	0.004	3.37919e-16
B3GNT8	1.18758e-20	0.118422	0.057	0.008	4.34667e-16
HLA-DQA1	1.29471e-20	-0.709653	0.075	0.293	4.73878e-16
PFDN5	1.37605e-20	-0.480472	0.887	0.936	5.03648e-16
TMSB10	1.41138e-20	0.386874	1	0.999	5.1658e-16
GADD45B	1.45865e-20	-1.01506	0.616	0.77	5.33882e-16
NBL1	1.59011e-20	-0.60061	0.142	0.377	5.81995e-16
ZFP36L1	3.0388e-20	-0.697207	0.59	0.748	1.11223e-15
SELE	3.17293e-20	-1.3073	0.062	0.269	1.16132e-15
USP54	3.64483e-20	0.158829	0.08	0.015	1.33404e-15
GJA1	3.7027e-20	-0.622955	0.072	0.286	1.35522e-15
VWA1	4.10259e-20	-0.684074	0.155	0.377	1.50159e-15
RPS4Y1	4.95293e-20	-0.675958	0.701	0.801	1.81282e-15
IFI44L	5.32028e-20	0.526484	0.451	0.254	1.94727e-15
NTRK2	6.00843e-20	0.151787	0.031	0.002	2.19915e-15
HLA-DRB5	6.67855e-20	-0.864294	0.374	0.586	2.44441e-15
ADIPOR2	6.84376e-20	0.311816	0.245	0.099	2.50488e-15
BTF3	7.77845e-20	-0.524421	0.874	0.92	2.84699e-15
TSPAN12	8.2659e-20	-0.507787	0.026	0.222	3.0254e-15
PKN3	1.05246e-19	0.382003	0.296	0.134	3.85212e-15
CYTL1	1.21401e-19	-0.6596	0.036	0.234	4.44341e-15
SIPA1L2	1.24415e-19	0.189567	0.098	0.023	4.55371e-15
HNRNPA1	1.32113e-19	-0.51836	0.768	0.851	4.83548e-15
APP	1.50144e-19	0.528281	0.835	0.713	5.4954e-15
ACTN4	1.77573e-19	0.59704	0.781	0.618	6.49935e-15
ABL2	3.11058e-19	0.379556	0.227	0.092	1.1385e-14
SOS1	3.67558e-19	0.401846	0.278	0.124	1.3453e-14
UQCRB	3.89403e-19	-0.526649	0.799	0.875	1.42525e-14
C8orf33	4.56689e-19	0.584158	0.433	0.248	1.67153e-14
CXCL2	4.61977e-19	1.11511	0.214	0.086	1.69088e-14
AL031666.1	4.73123e-19	0.1087	0.049	0.007	1.73168e-14
TGM2	5.11286e-19	0.324815	0.17	0.058	1.87136e-14
HLA-DPB1	5.53477e-19	-0.745734	0.446	0.638	2.02578e-14
ATP5PF	5.80059e-19	0.489625	0.784	0.628	2.12307e-14
CYTH3	6.46398e-19	0.222813	0.142	0.043	2.36588e-14
RBP7	8.40962e-19	-0.802851	0.095	0.306	3.07801e-14
S100A13	9.98916e-19	-0.582595	0.668	0.801	3.65613e-14
RPS26	1.17419e-18	-0.71006	0.959	0.974	4.29767e-14
ITGA6	1.20858e-18	-0.682932	0.564	0.713	4.42351e-14
TPM1	1.24504e-18	0.506704	0.376	0.2	4.55696e-14
TIMP1	1.25237e-18	-0.605501	0.58	0.742	4.58378e-14
TPM2	1.68012e-18	0.211754	0.059	0.01	6.14942e-14
PKIG	1.8002e-18	0.488012	0.448	0.262	6.58889e-14
MYL9	1.91372e-18	0.903158	0.428	0.258	7.00442e-14
NFKBIA	1.99027e-18	-0.964759	0.539	0.692	7.28459e-14
ARHGAP24	2.04944e-18	0.233043	0.129	0.038	7.50115e-14
CALU	2.2051e-18	0.521767	0.451	0.27	8.07088e-14
MT-ND4	2.22398e-18	-0.516555	0.992	0.992	8.13999e-14
XAF1	2.88809e-18	0.488332	0.518	0.322	1.05707e-13
ELN	3.0542e-18	0.593853	0.345	0.18	1.11787e-13
NRP1	3.55241e-18	-0.635132	0.281	0.489	1.30022e-13
SNHG7	3.82573e-18	-0.5744	0.711	0.828	1.40026e-13
NR4A2	4.05824e-18	0.412448	0.206	0.082	1.48536e-13
LAP3	4.3111e-18	0.653238	0.552	0.38	1.57791e-13
VAMP5	4.62304e-18	-0.619204	0.508	0.684	1.69208e-13
ARHGAP4	4.84514e-18	0.224446	0.101	0.025	1.77337e-13
TSPAN18	5.07023e-18	-0.512225	0.057	0.248	1.85575e-13
ZNF385D	5.81913e-18	-0.546164	0.088	0.287	2.12986e-13
HMCN1	7.03945e-18	0.363231	0.165	0.058	2.57651e-13
ARHGEF35	7.05084e-18	0.112532	0.057	0.009	2.58068e-13
CDH13	8.81585e-18	0.494991	0.624	0.435	3.22669e-13
CCDC69	8.99822e-18	-0.561966	0.211	0.422	3.29344e-13
CAPS	1.31337e-17	0.168873	0.09	0.021	4.80708e-13
ERC1	1.52454e-17	0.371119	0.278	0.13	5.57997e-13
LRATD2	2.11988e-17	-0.524661	0.075	0.266	7.75897e-13
BAIAP2	2.98392e-17	-0.46279	0.028	0.204	1.09214e-12
ITPRID2	3.18486e-17	0.530949	0.595	0.41	1.16569e-12
CDH5	3.19096e-17	0.555506	0.606	0.427	1.16792e-12
HLA-DQA2	3.29293e-17	-0.502096	0.023	0.194	1.20525e-12
JCAD	3.36734e-17	0.476297	0.415	0.24	1.23248e-12
AAK1	3.82903e-17	0.463251	0.418	0.243	1.40146e-12
PKP4	4.37784e-17	-0.566291	0.134	0.334	1.60233e-12
LFNG	4.98914e-17	-0.568742	0.082	0.269	1.82607e-12
WSB1	5.63542e-17	0.565694	0.57	0.385	2.06262e-12
EVL	5.63768e-17	0.468805	0.348	0.185	2.06345e-12
ANGPT2	5.93011e-17	-0.879442	0.129	0.325	2.17048e-12
ABO	6.4824e-17	0.207467	0.116	0.034	2.37262e-12
STXBP6	7.17481e-17	0.2957	0.142	0.047	2.62605e-12
ASS1	7.27236e-17	0.408475	0.307	0.154	2.66176e-12
HSPD1	8.30261e-17	-0.625656	0.32	0.509	3.03884e-12
SCN1B	9.86865e-17	-0.476763	0.075	0.264	3.61202e-12
TBX3	1.05263e-16	0.195493	0.075	0.016	3.85275e-12
GCNT1	1.06584e-16	0.276361	0.16	0.057	3.90107e-12
MX2	1.14391e-16	0.353444	0.206	0.085	4.18681e-12
ADD1	1.35099e-16	0.456517	0.49	0.305	4.94476e-12
EPB41L3	1.57516e-16	-0.472466	0.034	0.205	5.76524e-12
SH3BGRL2	1.67249e-16	-0.501482	0.064	0.246	6.12148e-12
SOD2	2.00318e-16	-0.710818	0.211	0.407	7.33184e-12
CSRP2	2.16168e-16	-0.560907	0.054	0.231	7.91198e-12
PTPRB	3.02302e-16	0.525406	0.678	0.511	1.10646e-11
ATP8A1	3.19985e-16	0.268365	0.147	0.051	1.17118e-11
SPNS2	3.26017e-16	-0.510175	0.106	0.297	1.19326e-11
BTC	3.66017e-16	0.114414	0.052	0.008	1.33966e-11
SLC1A5	3.86978e-16	-0.486374	0.067	0.249	1.41638e-11
BACE2	3.96823e-16	-0.577754	0.271	0.462	1.45241e-11
RHOU	5.18699e-16	-0.436585	0.01	0.165	1.89849e-11
FBLN2	5.57872e-16	0.487254	0.487	0.305	2.04187e-11
CTNNAL1	5.74928e-16	-0.507447	0.108	0.306	2.10429e-11
APLNR	6.16467e-16	-0.47441	0.031	0.195	2.25633e-11
PCDH19	6.38312e-16	-0.470469	0.034	0.199	2.33629e-11
SETBP1	6.66116e-16	0.160211	0.106	0.03	2.43805e-11
SEC11C	7.88469e-16	0.481145	0.436	0.269	2.88587e-11
TM4SF18	8.67633e-16	-0.515964	0.131	0.329	3.17562e-11
KRT10	1.0954e-15	0.434435	0.472	0.296	4.00926e-11
FAM241A	1.50529e-15	-0.485121	0.134	0.331	5.5095e-11
SV2A	1.78426e-15	0.105891	0.044	0.007	6.53058e-11
EEF2	1.94819e-15	-0.482946	0.747	0.821	7.13056e-11
PMVK	3.02495e-15	0.342586	0.263	0.126	1.10716e-10
MT-ND5	3.27913e-15	-0.516939	0.933	0.966	1.2002e-10
AMD1	3.59821e-15	0.684681	0.43	0.269	1.31698e-10
SOX4	3.6412e-15	-0.546648	0.16	0.347	1.33271e-10
DIXDC1	3.94332e-15	-0.529528	0.108	0.289	1.44329e-10
FCGRT	4.18169e-15	-0.494731	0.477	0.647	1.53054e-10
LRRC1	5.09233e-15	-0.440305	0.046	0.21	1.86384e-10
MX1	5.36031e-15	0.457626	0.423	0.253	1.96193e-10
ASRGL1	6.78912e-15	0.20877	0.142	0.05	2.48489e-10
SSX2IP	6.82864e-15	0.145739	0.072	0.017	2.49935e-10
DOCK11	7.12262e-15	-0.35592	0	0.137	2.60695e-10
DEK	8.07239e-15	-0.580122	0.536	0.688	2.95457e-10
PCBP2	8.60873e-15	-0.470573	0.518	0.666	3.15088e-10
DIPK2B	9.69159e-15	-0.547081	0.258	0.441	3.54722e-10
CMPK2	9.69322e-15	0.182367	0.098	0.028	3.54782e-10
TSPAN4	1.21226e-14	-0.489625	0.41	0.592	4.43697e-10
CUBN	1.21905e-14	0.161194	0.103	0.031	4.46186e-10
RASAL2	1.55425e-14	-0.496598	0.085	0.257	5.68872e-10
POLR2L	1.57153e-14	-0.493078	0.735	0.826	5.75195e-10
PCDH1	1.6542e-14	0.317161	0.237	0.112	6.05454e-10
BMX	1.7511e-14	0.331592	0.41	0.237	6.4092e-10
CLIC4	2.27992e-14	0.449261	0.451	0.288	8.34474e-10
PDLIM1	2.38477e-14	-0.542273	0.631	0.754	8.72849e-10
NFE2L1	2.50392e-14	-0.584639	0.338	0.513	9.16458e-10
EBF1	2.63886e-14	-0.553837	0.271	0.462	9.65851e-10
CCDC88C	2.69436e-14	0.29354	0.173	0.07	9.86162e-10
SEMA6A	3.12758e-14	-0.434619	0.062	0.225	1.14472e-09
FAM124B	3.42422e-14	0.170294	0.08	0.021	1.2533e-09
TESC	3.49098e-14	-0.447664	0.046	0.203	1.27773e-09
ODC1	3.57318e-14	-0.50222	0.08	0.247	1.30782e-09
MAP4K3	3.72355e-14	0.241082	0.134	0.048	1.36286e-09
FLI1	3.77124e-14	-0.41707	0.173	0.36	1.38031e-09
RPS16	3.90154e-14	-0.3451	0.982	0.991	1.428e-09
ZNF521	4.64052e-14	-0.455888	0.075	0.237	1.69848e-09
KLF2	4.82852e-14	0.46133	0.969	0.922	1.76729e-09
CARHSP1	4.93307e-14	-0.446729	0.129	0.307	1.80555e-09
IL6ST	5.23077e-14	-0.581808	0.43	0.587	1.91451e-09
EHD4	6.29801e-14	-0.523338	0.175	0.35	2.30514e-09
CTSC	7.19866e-14	-0.721708	0.322	0.489	2.63478e-09
SNTB2	7.51315e-14	-0.447403	0.152	0.336	2.74989e-09
SMAD1	9.20104e-14	-0.582089	0.302	0.481	3.36767e-09
EFNA1	1.02753e-13	0.460957	0.57	0.414	3.76087e-09
JUND	1.02896e-13	0.464636	0.946	0.891	3.7661e-09
SNCA	1.27313e-13	-0.418907	0.039	0.188	4.65978e-09
AGPAT1	1.39258e-13	0.225293	0.18	0.076	5.09697e-09
WLS	1.69143e-13	0.332609	0.294	0.157	6.1908e-09
RASA4	1.99674e-13	-0.412975	0.026	0.167	7.30828e-09
F11R	2.11015e-13	0.42839	0.343	0.197	7.72336e-09
ARGLU1	2.19155e-13	0.566931	0.727	0.595	8.02129e-09
MEOX2	2.36548e-13	-0.451565	0.08	0.242	8.65788e-09
MAP4	2.44797e-13	0.434632	0.521	0.362	8.95983e-09
RPS11	2.50121e-13	-0.349684	0.982	0.99	9.15468e-09
RAB31	2.60824e-13	0.187418	0.111	0.037	9.5464e-09
NRP2	2.68605e-13	-0.455478	0.072	0.227	9.83123e-09
LHX6	3.0508e-13	-0.356852	0.015	0.148	1.11662e-08
ATP1A1	3.21812e-13	0.425905	0.631	0.474	1.17786e-08
EIF3E	3.50168e-13	-0.480334	0.585	0.701	1.28165e-08
CAVIN3	3.58049e-13	0.473899	0.624	0.465	1.31049e-08
MSI2	5.14515e-13	0.217863	0.206	0.094	1.88318e-08
ATF4	5.36339e-13	-0.457346	0.358	0.529	1.96306e-08
RRBP1	5.95803e-13	-0.527768	0.371	0.531	2.1807e-08
MARCKSL1	6.42362e-13	-0.424779	0.09	0.25	2.35111e-08
BTG2	6.43533e-13	0.789321	0.588	0.47	2.3554e-08
MT1E	7.04572e-13	0.708432	0.294	0.159	2.5788e-08
TIAM1	7.55597e-13	-0.33348	0.005	0.128	2.76556e-08
SNHG8	8.21204e-13	-0.530026	0.57	0.709	3.00569e-08
RGS16	9.30695e-13	-1.13265	0.137	0.294	3.40644e-08
CYB561D2	9.46005e-13	0.148353	0.077	0.021	3.46247e-08
PROSER2	1.00844e-12	0.110887	0.064	0.015	3.69101e-08
LIMCH1	1.02284e-12	0.324193	0.32	0.175	3.74371e-08
PIK3R3	1.0489e-12	0.410888	0.402	0.251	3.83909e-08
ANP32B	1.07067e-12	-0.517499	0.477	0.631	3.91875e-08
CCNI	1.10727e-12	-0.487234	0.572	0.715	4.05274e-08
SERPINB6	1.33102e-12	0.364378	0.552	0.407	4.87167e-08
GNS	1.39115e-12	-0.417433	0.116	0.282	5.09174e-08
COMMD6	1.43523e-12	-0.431172	0.631	0.746	5.25308e-08
TRIB1	1.60243e-12	-0.481702	0.09	0.247	5.86504e-08
CD63	1.67835e-12	-0.387708	0.894	0.933	6.14294e-08
CD58	1.81965e-12	0.294645	0.198	0.091	6.66009e-08
MCF2L	2.61249e-12	-0.384113	0.046	0.186	9.56199e-08
PLA2G4A	2.99914e-12	0.138899	0.106	0.036	1.09771e-07
HSP90AB1	3.00185e-12	-0.37186	0.912	0.941	1.09871e-07
POMP	3.23421e-12	0.485675	0.629	0.482	1.18375e-07
MERTK	3.70624e-12	0.133115	0.07	0.018	1.35652e-07
FKBP11	3.79091e-12	-0.36509	0.039	0.175	1.38751e-07
AKR1C2	4.24351e-12	-0.624953	0.07	0.216	1.55317e-07
RDX	4.70051e-12	0.554682	0.706	0.58	1.72043e-07
SULF2	4.76011e-12	0.351183	0.51	0.352	1.74225e-07
MTUS1	5.6065e-12	0.52227	0.696	0.576	2.05203e-07
HSPA8	6.53612e-12	-0.471304	0.598	0.694	2.39229e-07
ICAM1	6.56844e-12	-0.573445	0.168	0.328	2.40411e-07
TRIP6	6.92178e-12	0.190447	0.157	0.066	2.53344e-07
ESAM	6.93935e-12	0.434553	0.698	0.557	2.53987e-07
HES1	7.28025e-12	-0.934781	0.487	0.622	2.66464e-07
WWP1	7.75139e-12	-0.482197	0.224	0.385	2.83709e-07
MRTFB	7.97962e-12	-0.541682	0.332	0.49	2.92062e-07
SMC6	8.12326e-12	0.242454	0.16	0.069	2.97319e-07
SEC11A	8.7058e-12	-0.459802	0.559	0.678	3.18641e-07
ERP29	9.283e-12	-0.492901	0.376	0.533	3.39767e-07
SCD5	9.55859e-12	0.134136	0.077	0.022	3.49854e-07
COX17	9.61863e-12	0.371798	0.461	0.309	3.52051e-07
TRIM2	9.83523e-12	0.170957	0.124	0.047	3.59979e-07
F2R	1.01476e-11	-0.383533	0.064	0.205	3.71413e-07
NET1	1.08224e-11	-0.50973	0.224	0.382	3.9611e-07
AC020916.1	1.12174e-11	0.435841	0.399	0.255	4.10567e-07
PDK3	1.16126e-11	0.144299	0.085	0.026	4.25033e-07
GNAS	1.18011e-11	0.386925	0.91	0.869	4.31932e-07
GUK1	1.20166e-11	-0.430737	0.832	0.857	4.39819e-07
MYEF2	1.29087e-11	0.197191	0.142	0.057	4.7247e-07
LEPROTL1	1.38498e-11	0.313959	0.245	0.129	5.06915e-07
PTMS	1.39304e-11	-0.389168	0.894	0.925	5.09866e-07
CD14	1.44011e-11	-0.383623	0.023	0.145	5.27096e-07
MET	1.49036e-11	0.372172	0.278	0.156	5.45488e-07
LRP6	1.72205e-11	0.251986	0.183	0.084	6.30288e-07
CSRP1	1.74738e-11	0.40949	0.399	0.259	6.39557e-07
LY6E	1.81867e-11	-0.495667	0.678	0.784	6.65652e-07
TUBA1B	1.93094e-11	-0.436361	0.642	0.754	7.06744e-07
MAP1LC3B	2.521e-11	-0.473774	0.42	0.564	9.22711e-07
FES	2.69245e-11	0.248067	0.173	0.078	9.85464e-07
CTTNBP2	2.7591e-11	-0.302611	0.005	0.112	1.00986e-06
CALM1	2.80212e-11	0.34195	0.959	0.944	1.02561e-06
CPM	2.88101e-11	0.275833	0.057	0.014	1.05448e-06
PCMTD1	3.00837e-11	0.379093	0.51	0.358	1.1011e-06
HSPA1A	3.32647e-11	-0.645509	0.472	0.613	1.21752e-06
ZNF704	3.32942e-11	0.263008	0.155	0.067	1.2186e-06
TAGLN	3.45289e-11	0.775781	0.32	0.198	1.26379e-06
RAI14	3.57295e-11	-0.417693	0.165	0.318	1.30774e-06
TACC1	4.16464e-11	0.492812	0.678	0.582	1.5243e-06
NPM1	4.27839e-11	-0.421094	0.727	0.811	1.56593e-06
STK38L	4.30897e-11	0.227414	0.144	0.061	1.57713e-06
OTULINL	4.33736e-11	-0.316066	0.003	0.106	1.58752e-06
MAP2	4.66863e-11	0.123649	0.07	0.02	1.70877e-06
CLDN11	4.70926e-11	-0.295501	0.052	0.183	1.72364e-06
BCL3	5.08872e-11	-0.369346	0.095	0.239	1.86252e-06
PCTP	5.2816e-11	0.155232	0.082	0.026	1.93312e-06
FADS3	5.47381e-11	0.255332	0.16	0.071	2.00347e-06
ROBO4	6.23672e-11	-0.442283	0.26	0.419	2.2827e-06
PSORS1C1	6.40731e-11	0.187942	0.103	0.037	2.34514e-06
AC104083.1	7.28824e-11	0.132911	0.059	0.015	2.66757e-06
SLC25A6	7.32938e-11	-0.438273	0.621	0.718	2.68263e-06
MATN2	7.86695e-11	-0.347791	0.026	0.142	2.87938e-06
DOC2B	7.88064e-11	-0.360079	0.09	0.234	2.88439e-06
TNFAIP8L1	8.33049e-11	-0.334354	0.059	0.191	3.04904e-06
CITED4	9.2307e-11	0.306705	0.193	0.095	3.37853e-06
SHE	1.00951e-10	0.272307	0.338	0.202	3.69492e-06
SLCO2A1	1.01789e-10	-0.344771	0.036	0.156	3.72558e-06
CCN2	1.04529e-10	-0.637808	0.729	0.802	3.82585e-06
RSAD2	1.13514e-10	0.24543	0.16	0.072	4.15474e-06
GBP4	1.22343e-10	-0.477717	0.255	0.416	4.47787e-06
CAPZA2	1.25618e-10	0.457576	0.546	0.416	4.59773e-06
LBH	1.41988e-10	-0.305871	0.018	0.128	5.1969e-06
DLL1	1.55751e-10	-0.292692	0.013	0.119	5.70062e-06
PTK2B	1.58225e-10	-0.327308	0.034	0.149	5.79119e-06
SPTAN1	1.61955e-10	0.350514	0.621	0.475	5.92773e-06
HABP4	1.67568e-10	0.222466	0.186	0.089	6.13314e-06
GNG12	1.77507e-10	-0.433876	0.204	0.349	6.49693e-06
INSR	1.90026e-10	0.307493	0.253	0.14	6.95513e-06
LRP5	2.15971e-10	-0.286647	0.023	0.135	7.90476e-06
GIMAP6	2.19383e-10	-0.412764	0.271	0.425	8.02965e-06
UPP1	2.26895e-10	-0.472602	0.157	0.298	8.3046e-06
YBX1	2.65498e-10	-0.374909	0.899	0.918	9.71748e-06
NTHL1	2.8024e-10	0.420833	0.335	0.21	1.02571e-05
RALGDS	2.84963e-10	-0.442448	0.16	0.301	1.04299e-05
PTMA	2.94743e-10	0.24424	1	0.999	1.07879e-05
C1QTNF1	2.95689e-10	-0.30129	0.015	0.12	1.08225e-05
ACSL1	2.98994e-10	0.101763	0.057	0.015	1.09435e-05
POSTN	3.06312e-10	-0.253436	0.075	0.212	1.12113e-05
MYL12A	3.18833e-10	-0.343811	0.856	0.895	1.16696e-05
IFITM3	3.30593e-10	0.290368	0.997	0.994	1.21e-05
CREM	3.39893e-10	0.252862	0.155	0.07	1.24404e-05
SEPTIN10	3.40195e-10	-0.4266	0.237	0.399	1.24515e-05
PDZD2	3.40607e-10	0.174933	0.126	0.052	1.24666e-05
NEURL1B	3.51333e-10	-0.266381	0.015	0.121	1.28591e-05
CNN3	3.64692e-10	-0.456466	0.322	0.46	1.33481e-05
ADAM15	3.77562e-10	0.396982	0.709	0.589	1.38191e-05
SP110	4.52772e-10	0.348807	0.358	0.226	1.65719e-05
PPIA	4.57203e-10	-0.353522	0.861	0.916	1.67341e-05
PRPSAP1	5.02943e-10	-0.390053	0.139	0.277	1.84082e-05
SLC50A1	5.33671e-10	0.182319	0.186	0.09	1.95329e-05
CCSER2	5.3625e-10	0.301362	0.278	0.161	1.96273e-05
SDC3	5.66114e-10	0.158205	0.101	0.037	2.07203e-05
TRAPPC6A	5.98269e-10	-0.367929	0.116	0.256	2.18972e-05
PHACTR4	6.1762e-10	0.320269	0.436	0.297	2.26055e-05
AFDN	6.18325e-10	0.33958	0.425	0.29	2.26313e-05
MLPH	6.31634e-10	-0.298756	0.028	0.138	2.31184e-05
SORT1	6.59387e-10	0.141275	0.116	0.046	2.41342e-05
FLNB	7.05558e-10	0.381709	0.503	0.364	2.58241e-05
DDX24	7.10453e-10	0.393476	0.67	0.563	2.60033e-05
FKBP10	8.01584e-10	-0.252472	0.013	0.112	2.93388e-05
CCNG2	8.23685e-10	-0.313358	0.049	0.166	3.01477e-05
UQCRH	9.01246e-10	-0.388182	0.557	0.664	3.29865e-05
SERPINB1	9.24938e-10	-0.447152	0.281	0.421	3.38537e-05
GMNN	9.73302e-10	0.238536	0.137	0.06	3.56238e-05
MIR181A1HG	1.00239e-09	0.123533	0.059	0.017	3.66884e-05
FBL	1.04952e-09	-0.418303	0.327	0.468	3.84134e-05
ATP11C	1.13085e-09	-0.370911	0.106	0.238	4.13901e-05
ANKS1A	1.16028e-09	-0.302566	0.041	0.153	4.24675e-05
CASTOR1	1.17943e-09	0.17652	0.113	0.046	4.31682e-05
CEBPB	1.20651e-09	0.157371	0.108	0.043	4.41594e-05
PLSCR4	1.24918e-09	-0.422661	0.152	0.287	4.57212e-05
ORAI1	1.34929e-09	0.350704	0.394	0.267	4.93855e-05
TGOLN2	1.45941e-09	0.357806	0.495	0.365	5.34159e-05
ARL4C	1.53892e-09	-0.288512	0.031	0.138	5.6326e-05
FADS1	1.5817e-09	0.117941	0.049	0.012	5.78918e-05
WWTR1	1.60274e-09	-0.470952	0.371	0.507	5.8662e-05
PPP2R5A	1.6585e-09	-0.383787	0.098	0.223	6.07026e-05
EIF1	1.83657e-09	-0.316526	0.985	0.977	6.72203e-05
SHROOM1	1.87393e-09	0.134281	0.106	0.041	6.85875e-05
TAGLN2	1.92076e-09	0.326586	0.943	0.893	7.03016e-05
EBPL	1.94844e-09	-0.401498	0.183	0.323	7.13148e-05
LNX1	1.96158e-09	-0.289115	0.021	0.12	7.17956e-05
C6orf141	1.98638e-09	-0.269949	0.013	0.108	7.27035e-05
PECAM1	2.03604e-09	-0.371034	0.92	0.933	7.45212e-05
PTGS2	2.29792e-09	0.52499	0.155	0.074	8.41061e-05
TACSTD2	2.42975e-09	-0.295075	0.013	0.106	8.89312e-05
KRT8	2.52508e-09	-0.365687	0.077	0.197	9.24205e-05
ARL4A	2.64316e-09	-0.469454	0.508	0.623	9.67422e-05
HAPLN3	2.70603e-09	-0.279905	0.044	0.155	9.90435e-05
SESN3	2.7728e-09	-0.36721	0.057	0.17	0.000101487
C11orf96	2.82372e-09	-0.375613	0.023	0.123	0.000103351
ITGB1	2.93236e-09	0.356164	0.84	0.787	0.000107327
INKA2	3.08442e-09	0.107634	0.044	0.01	0.000112893
DHRS3	3.10144e-09	0.208763	0.17	0.084	0.000113516
CMIP	3.14012e-09	-0.403492	0.271	0.405	0.000114932
S100A11	3.6078e-09	0.422164	0.848	0.813	0.000132049
ZNF608	3.71361e-09	-0.2463	0.008	0.096	0.000135922
ST13	3.74086e-09	-0.380575	0.57	0.694	0.000136919
EEF1D	3.82321e-09	-0.375408	0.856	0.908	0.000139933
AGA	3.9351e-09	0.188289	0.108	0.044	0.000144029
CNDP2	4.65406e-09	0.240887	0.188	0.098	0.000170343
ARL6IP5	4.78499e-09	0.352927	0.611	0.482	0.000175135
ABCB9	4.90646e-09	0.101649	0.031	0.006	0.000179581
FAM43A	4.99118e-09	-0.356157	0.088	0.208	0.000182682
GNAI2	5.00001e-09	0.331692	0.894	0.846	0.000183005
PPL	5.29933e-09	-0.332478	0.082	0.205	0.000193961
PBX1	5.3477e-09	-0.305294	0.07	0.186	0.000195731
PLEC	5.73879e-09	0.314269	0.588	0.459	0.000210045
GGT5	5.8935e-09	-0.387375	0.126	0.252	0.000215708
LIMS1	6.07045e-09	-0.435176	0.526	0.634	0.000222184
UXT	6.19983e-09	-0.420459	0.379	0.504	0.00022692
UBA52	6.3278e-09	-0.257817	0.966	0.971	0.000231604
LIMA1	6.41726e-09	0.364849	0.564	0.438	0.000234878
TMEM255B	6.80171e-09	-0.371227	0.144	0.275	0.000248949
SGIP1	6.92303e-09	0.174206	0.072	0.024	0.00025339
PRKAG2	7.10896e-09	-0.332149	0.085	0.203	0.000260195
ITPR2	7.83687e-09	0.435171	0.379	0.259	0.000286837
IKBIP	7.9947e-09	-0.357553	0.124	0.253	0.000292614
COL4A2	8.12016e-09	-0.444054	0.211	0.344	0.000297206
RBM38	8.17159e-09	0.13613	0.08	0.028	0.000299088
CADM3	8.46907e-09	-0.281128	0.01	0.097	0.000309976
LEPR	8.48766e-09	0.290613	0.317	0.202	0.000310657
ADGRL2	8.49488e-09	-0.285168	0.041	0.144	0.000310921
KLF12	8.5344e-09	0.159833	0.075	0.026	0.000312367
PRICKLE2	8.59052e-09	0.112928	0.067	0.022	0.000314422
RSL1D1	8.75111e-09	-0.373465	0.268	0.406	0.000320299
AHNAK	8.76447e-09	-0.387169	0.807	0.847	0.000320789
PGM5	9.1978e-09	-0.29318	0.085	0.206	0.000336649
HSPG2	9.44611e-09	-0.324759	0.57	0.687	0.000345737
FZD4	1.01871e-08	-0.272215	0.044	0.147	0.00037286
MGLL	1.09006e-08	-0.467429	0.454	0.569	0.000398975
ABI3	1.11084e-08	-0.268066	0.07	0.183	0.000406578
DAP	1.11839e-08	0.298966	0.394	0.271	0.000409343
LINC00472	1.12486e-08	0.176994	0.082	0.03	0.000411709
PCAT19	1.19903e-08	-0.431525	0.66	0.752	0.000438858
APOLD1	1.20463e-08	0.380204	0.276	0.171	0.000440905
H1F0	1.23072e-08	0.247039	0.209	0.115	0.000450455
UQCRQ	1.29252e-08	0.340332	0.642	0.544	0.000473073
EIF4B	1.31047e-08	-0.4024	0.474	0.595	0.000479647
ST6GAL1	1.34655e-08	-0.347004	0.126	0.25	0.000492852
FRMD4B	1.35389e-08	0.369388	0.412	0.293	0.000495538
GABARAPL2	1.38208e-08	0.322602	0.601	0.486	0.000505854
ZNF664	1.41339e-08	0.124313	0.137	0.063	0.000517316
PLCB1	1.41687e-08	0.229148	0.278	0.168	0.000518587
KLF9	1.43226e-08	-0.412373	0.461	0.58	0.000524221
CDK19	1.48576e-08	0.250388	0.142	0.067	0.000543804
KRT18	1.54264e-08	-0.30697	0.106	0.227	0.000564623
CEP68	1.65301e-08	0.245734	0.42	0.287	0.000605019
MYO1C	1.65671e-08	0.33778	0.371	0.254	0.000606372
ABLIM1	1.73707e-08	-0.380153	0.291	0.428	0.000635785
WWC3	1.93164e-08	0.206972	0.201	0.11	0.000707
SNHG16	2.04083e-08	-0.403039	0.291	0.422	0.000746965
MRPL17	2.12272e-08	0.295015	0.281	0.171	0.000776937
LYL1	2.14119e-08	0.280715	0.304	0.19	0.000783698
PMP22	2.146e-08	-0.441209	0.554	0.642	0.000785458
DENND11	2.19188e-08	0.171731	0.106	0.045	0.00080225
PLCB4	2.26028e-08	0.212074	0.294	0.18	0.000827286
TCF7L1	2.33006e-08	0.267017	0.183	0.097	0.000852825
TNK2	2.3547e-08	0.107608	0.07	0.024	0.000861845
APOL4	2.38118e-08	0.1096	0.046	0.012	0.000871537
CLIC1	2.39458e-08	-0.349514	0.704	0.769	0.000876441
ABCG2	2.49629e-08	-0.223464	0.023	0.115	0.000913667
TMEM123	2.50774e-08	-0.350147	0.278	0.417	0.000917857
HSD17B11	2.67794e-08	-0.387393	0.309	0.434	0.000980153
FMO2	2.71199e-08	0.119778	0.049	0.014	0.000992615
MXD4	2.83692e-08	0.2478	0.281	0.173	0.00103834
ITGB4	2.8412e-08	-0.426731	0.523	0.627	0.00103991
RFLNB	2.94305e-08	-0.259936	0.013	0.096	0.00107718
RAB11A	2.98568e-08	-0.368382	0.539	0.646	0.00109279
SVIL	3.01212e-08	-0.334462	0.098	0.213	0.00110247
SYT15	3.14158e-08	-0.222887	0.013	0.097	0.00114985
EFEMP1	3.25795e-08	-0.696043	0.17	0.289	0.00119244
NTN4	3.2598e-08	-0.314334	0.116	0.238	0.00119312
HPCAL1	3.31998e-08	0.246657	0.32	0.208	0.00121515
IFI44	3.32003e-08	0.311503	0.284	0.178	0.00121516
HMGXB3	3.46798e-08	0.287194	0.201	0.112	0.00126931
PLAAT3	3.53941e-08	-0.365991	0.325	0.445	0.00129546
HECW2	3.55516e-08	0.18684	0.064	0.022	0.00130123
GABARAPL1	3.63505e-08	0.264409	0.34	0.221	0.00133047
CD302	3.80255e-08	-0.315068	0.088	0.2	0.00139177
ELF1	4.17109e-08	0.302026	0.438	0.32	0.00152666
MSN	4.22839e-08	0.343671	0.639	0.527	0.00154763
RAP2A	4.37647e-08	0.123737	0.121	0.054	0.00160183
CHST7	4.7429e-08	-0.240838	0.018	0.102	0.00173595
ZDHHC20	4.88288e-08	0.279929	0.268	0.166	0.00178718
ID2	4.88552e-08	-0.419247	0.232	0.364	0.00178815
HBEGF	5.04463e-08	0.246047	0.216	0.122	0.00184639
CALML4	5.10167e-08	-0.273216	0.044	0.14	0.00186726
PRKY	5.10791e-08	0.149009	0.088	0.034	0.00186955
TBC1D4	5.17615e-08	-0.286608	0.059	0.162	0.00189452
ZRSR2	5.19498e-08	0.244313	0.16	0.082	0.00190141
KIAA1671	5.32756e-08	0.279972	0.278	0.174	0.00194994
IFI16	5.41487e-08	-0.370728	0.626	0.71	0.0019819
SMS	5.56846e-08	0.202194	0.191	0.104	0.00203811
UNC5B	5.65064e-08	0.102917	0.041	0.011	0.00206819
CARD8	5.65622e-08	-0.332154	0.188	0.318	0.00207023
TMCC3	5.82289e-08	-0.286078	0.046	0.143	0.00213124
HIPK3	5.84386e-08	-0.424487	0.289	0.411	0.00213891
SEPTIN6	5.85223e-08	0.214191	0.17	0.09	0.00214198
FEZ2	6.07683e-08	0.316574	0.441	0.325	0.00222418
PEPD	6.28959e-08	0.239248	0.296	0.185	0.00230205
CEP131	6.363e-08	0.109265	0.064	0.022	0.00232892
THBS3	6.62377e-08	0.14257	0.108	0.047	0.00242437
LAPTM4A	7.08662e-08	0.296291	0.722	0.608	0.00259377
BHLHE41	7.1311e-08	-0.277686	0.018	0.1	0.00261005
TBC1D9	7.18951e-08	0.199515	0.119	0.054	0.00263143
SDR16C5	7.20426e-08	0.100345	0.064	0.022	0.00263683
COMMD2	7.52753e-08	0.255609	0.206	0.117	0.00275515
PFKP	7.68696e-08	-0.307093	0.124	0.241	0.00281351
LINC02185	7.76146e-08	-0.397132	0.106	0.218	0.00284077
PGM2L1	8.75864e-08	0.249123	0.214	0.123	0.00320575
RAB3C	8.84163e-08	-0.198259	0.005	0.079	0.00323612
BNIP3	8.962e-08	-0.361194	0.108	0.214	0.00328018
PIAS3	9.11129e-08	0.18122	0.137	0.066	0.00333482
CSPP1	9.11661e-08	0.18449	0.168	0.088	0.00333677
RFK	9.64924e-08	0.145717	0.198	0.108	0.00353172
CDC25B	9.73854e-08	-0.250856	0.052	0.149	0.0035644
SNAI1	9.77921e-08	-0.28035	0.028	0.115	0.00357929
JAK1	1.05201e-07	-0.416917	0.464	0.57	0.00385045
INHBB	1.09834e-07	-0.296288	0.028	0.115	0.00402003
IFNAR2	1.11442e-07	0.226559	0.26	0.158	0.0040789
AC004540.1	1.22643e-07	0.198376	0.142	0.071	0.00448886
ITGA2	1.22754e-07	-0.259541	0.044	0.137	0.0044929
RND1	1.25336e-07	-0.337251	0.031	0.118	0.00458744
HOPX	1.30943e-07	-0.174302	0.005	0.077	0.00479265
GNG11	1.32044e-07	-0.311156	0.979	0.982	0.00483293
ADAM17	1.32386e-07	0.214935	0.198	0.112	0.00484545
ANXA11	1.41907e-07	-0.340713	0.291	0.417	0.00519393
MIDN	1.4324e-07	0.359502	0.5	0.387	0.00524271
PRDX4	1.46497e-07	-0.380523	0.284	0.407	0.00536192
CHD3	1.4913e-07	0.203636	0.144	0.073	0.00545829
SLC2A1	1.52228e-07	0.100942	0.052	0.016	0.0055717
FHL3	1.56569e-07	0.104832	0.098	0.042	0.00573057
HLA-DMA	1.58547e-07	-0.401868	0.376	0.497	0.00580298
AHNAK2	1.61048e-07	0.316095	0.32	0.212	0.00589452
INKA1	1.61543e-07	0.215257	0.121	0.057	0.00591264
ACKR3	1.63133e-07	-0.258569	0.021	0.101	0.00597083
MTURN	1.68996e-07	0.248121	0.286	0.181	0.00618541
NSA2	1.7388e-07	-0.402771	0.497	0.616	0.00636418
RABGAP1	1.75963e-07	0.263598	0.204	0.117	0.00644042
CBR3	1.76409e-07	-0.321467	0.101	0.206	0.00645674
ELOVL7	1.76584e-07	-0.328221	0.111	0.222	0.00646316
DDT	1.83901e-07	-0.333358	0.296	0.424	0.00673095
SYF2	1.85777e-07	-0.386358	0.526	0.642	0.00679962
CDC42EP3	1.95084e-07	-0.411961	0.312	0.426	0.00714027
SEC61B	2.03455e-07	0.273994	0.67	0.554	0.00744667
CYTH1	2.07542e-07	-0.327293	0.134	0.245	0.00759626
PGF	2.086e-07	-0.249328	0.026	0.109	0.00763498
SMAGP	2.12211e-07	-0.188956	0.049	0.144	0.00776713
RCN1	2.15336e-07	-0.392313	0.276	0.389	0.0078815
PXDN	2.16652e-07	-0.262781	0.064	0.165	0.00792967
EIF3K	2.18033e-07	-0.365266	0.67	0.743	0.00798024
EFCAB14	2.19721e-07	0.263856	0.34	0.229	0.00804202
TLL1	2.34719e-07	-0.217893	0.021	0.1	0.00859095
SLC38A1	2.36647e-07	-0.258296	0.041	0.13	0.00866151
CRIM1	2.38915e-07	-0.320115	0.43	0.544	0.00874453
AOPEP	2.38975e-07	0.308306	0.379	0.268	0.00874674
ALAS1	2.40388e-07	0.124307	0.124	0.059	0.00879845
PTPN12	2.44954e-07	0.291567	0.528	0.412	0.00896555
PITPNC1	2.54251e-07	-0.220807	0.052	0.146	0.00930584
TSPO	2.63286e-07	0.310246	0.799	0.724	0.00963653
RPSA	2.63475e-07	-0.275614	0.92	0.942	0.00964345
SGCB	2.69897e-07	0.126059	0.113	0.052	0.00987851
ENSA	2.7035e-07	-0.348606	0.302	0.415	0.00989509
KIF26A	2.71961e-07	0.226419	0.17	0.093	0.00995404
STK10	2.77834e-07	0.16139	0.124	0.06	0.010169
CUEDC1	2.89147e-07	0.169233	0.134	0.067	0.0105831
VCAN	2.94679e-07	-0.241102	0.005	0.073	0.0107855
HIP1R	3.01366e-07	0.199885	0.178	0.097	0.0110303
CADM3-AS1	3.06688e-07	-0.214766	0.013	0.086	0.0112251
TEAD4	3.21032e-07	0.148445	0.095	0.041	0.0117501
CORO2A	3.25807e-07	-0.185273	0.008	0.077	0.0119249
MAN1A1	3.26647e-07	-0.246753	0.085	0.191	0.0119556
PDK4	3.37914e-07	-0.285279	0.046	0.136	0.012368
SMARCA2	3.42658e-07	0.314433	0.348	0.246	0.0125416
STARD3	3.47871e-07	-0.319304	0.139	0.25	0.0127324
ALDH2	3.83195e-07	-0.248484	0.082	0.184	0.0140253
GCH1	3.93681e-07	0.106414	0.064	0.023	0.0144091
METRNL	3.97012e-07	-0.427018	0.227	0.335	0.014531
TYMP	3.99431e-07	-0.352209	0.216	0.339	0.0146196
DOCK4	4.10096e-07	-0.213727	0.08	0.184	0.0150099
C2CD4B	4.11939e-07	-0.500073	0.16	0.28	0.0150774
RNF19A	4.16248e-07	0.249937	0.358	0.243	0.0152351
TCTEX1D1	4.2119e-07	-0.172619	0.003	0.067	0.015416
KLF10	4.35886e-07	-0.47107	0.32	0.433	0.0159539
APOD	4.39986e-07	-0.360434	0.077	0.174	0.0161039
TAF1D	4.50365e-07	-0.3141	0.24	0.365	0.0164838
HLA-DQB1	4.6356e-07	-0.474469	0.358	0.467	0.0169667
TPM3	5.22461e-07	-0.297326	0.827	0.885	0.0191226
TAPBP	5.28961e-07	-0.374355	0.389	0.495	0.0193605
EDN1	5.31758e-07	-0.282675	0.446	0.565	0.0194629
FBXO31	5.59341e-07	-0.251393	0.052	0.14	0.0204725
GPIHBP1	5.63035e-07	0.243573	0.17	0.094	0.0206077
RHOJ	5.70087e-07	-0.270302	0.121	0.224	0.0208658
FURIN	5.80557e-07	0.215241	0.198	0.116	0.021249
RASGRF2	5.96216e-07	0.18374	0.134	0.068	0.0218221
GRB10	6.00241e-07	-0.234034	0.088	0.19	0.0219694
ARL6IP1	6.03589e-07	-0.354547	0.443	0.551	0.022092
EIF4G2	6.08779e-07	0.317149	0.616	0.516	0.0222819
TMEM120A	6.12434e-07	0.301807	0.18	0.102	0.0224157
LINC00987	6.14332e-07	0.141183	0.088	0.037	0.0224852
ZSCAN16-AS1	6.52301e-07	0.133828	0.149	0.078	0.0238749
PTPRM	6.83415e-07	0.286047	0.394	0.284	0.0250137
NRN1	6.841e-07	-0.406692	0.464	0.56	0.0250387
SWAP70	6.9868e-07	0.363613	0.456	0.363	0.0255724
CFI	7.14177e-07	-0.315279	0.216	0.332	0.0261396
MEGF6	7.62483e-07	-0.247201	0.057	0.145	0.0279076
SKP1	8.05159e-07	0.254595	0.693	0.619	0.0294696
RAB34	8.09343e-07	0.149563	0.188	0.108	0.0296228
MAP7D1	8.14175e-07	0.231976	0.247	0.156	0.0297996
SMIM10	8.58626e-07	-0.235546	0.054	0.143	0.0314266
SORBS2	8.62237e-07	0.190391	0.232	0.142	0.0315587
MRRF	8.7909e-07	-0.191961	0.031	0.109	0.0321756
CALM2	8.82408e-07	0.280189	0.83	0.776	0.032297
SUB1	8.85568e-07	0.241031	0.534	0.421	0.0324127
ATP8A2	9.01292e-07	-0.177626	0.021	0.094	0.0329882
SLC40A1	9.11159e-07	-0.210574	0.064	0.158	0.0333493
POLR1D	9.30103e-07	-0.303655	0.276	0.39	0.0340427
HRH1	9.39056e-07	-0.286553	0.082	0.176	0.0343704
CPNE2	9.55898e-07	0.223808	0.211	0.127	0.0349868
IMPDH2	1.01365e-06	-0.269601	0.139	0.246	0.0371005
CAST	1.06573e-06	-0.323707	0.814	0.845	0.0390067
PALLD	1.13816e-06	0.220857	0.247	0.154	0.0416579
SLC38A2	1.15947e-06	-0.371927	0.302	0.414	0.0424377
TNFRSF1A	1.17477e-06	-0.377778	0.273	0.379	0.0429979
RBM3	1.18121e-06	-0.305556	0.729	0.783	0.0432335
NUAK1	1.18601e-06	-0.345093	0.325	0.44	0.043409
ADAR	1.20259e-06	0.254828	0.379	0.274	0.0440159
NOS3	1.22855e-06	0.149135	0.124	0.062	0.0449662
PSIP1	1.23065e-06	0.292045	0.531	0.421	0.0450429
PLEKHG2	1.24797e-06	0.111431	0.075	0.03	0.0456768
PLEKHF2	1.25027e-06	0.198457	0.147	0.079	0.045761
BCKDHA	1.30446e-06	0.217814	0.219	0.134	0.0477447
MYOF	1.30627e-06	-0.324348	0.286	0.398	0.0478107
EPB41L4A-AS1	1.31931e-06	-0.262328	0.265	0.388	0.048288
MOSPD2	1.37663e-06	0.116205	0.139	0.072	0.0503861
PLXNA2	1.40298e-06	0.260934	0.219	0.133	0.0513504
CSF2RB	1.40378e-06	-0.292979	0.085	0.178	0.0513798
TP53I11	1.43404e-06	0.154114	0.088	0.038	0.0524872
C21orf91	1.43631e-06	-0.236454	0.054	0.141	0.0525704
CLIC2	1.47875e-06	-0.264963	0.16	0.27	0.0541239
PLXDC2	1.53661e-06	0.24338	0.258	0.167	0.0562416
TCEA3	1.55496e-06	-0.168801	0.015	0.084	0.0569131
ITIH5	1.58532e-06	-0.341292	0.095	0.195	0.0580243
MAPK3	1.60859e-06	0.334264	0.418	0.315	0.0588759
OSBPL10	1.62651e-06	-0.194109	0.044	0.126	0.0595318
DRAM1	1.62677e-06	0.149544	0.131	0.068	0.0595415
CD200	1.69872e-06	0.118088	0.054	0.019	0.0621748
AMIGO2	1.70698e-06	-0.175365	0.015	0.083	0.0624771
KIAA0355	1.74885e-06	0.287452	0.554	0.45	0.0640096
BIRC3	1.82058e-06	-0.241469	0.046	0.129	0.066635
SCARA3	1.83062e-06	-0.302817	0.059	0.143	0.0670025
FILIP1L	1.83807e-06	0.327542	0.41	0.307	0.0672751
NFIB	1.91332e-06	-0.274747	0.539	0.646	0.0700295
RNASEH2C	2.02431e-06	0.228548	0.353	0.245	0.0740918
LDB2	2.06323e-06	-0.25058	0.253	0.374	0.0755162
KCNJ12	2.0962e-06	0.126073	0.059	0.022	0.076723
TMEM159	2.09854e-06	-0.201936	0.046	0.128	0.0768085
MAGEH1	2.09902e-06	0.140932	0.183	0.105	0.0768263
RAMP2-AS1	2.12244e-06	0.15084	0.077	0.033	0.0776836
RAD50	2.19753e-06	0.157233	0.124	0.063	0.0804317
C7orf50	2.25721e-06	0.185448	0.216	0.133	0.0826161
RERE	2.26547e-06	-0.286825	0.178	0.287	0.0829183
APBB2	2.29687e-06	0.223006	0.219	0.135	0.0840678
RALGAPA2	2.32033e-06	-0.282467	0.129	0.23	0.0849264
HID1	2.34113e-06	-0.225326	0.034	0.107	0.0856876
GIMAP2	2.3964e-06	-0.233452	0.062	0.147	0.0877107
FRMD3	2.42447e-06	-0.189943	0.015	0.081	0.088738
HRCT1	2.42594e-06	-0.251036	0.106	0.203	0.0887918
TLE1	2.4385e-06	0.256406	0.245	0.158	0.0892517
CARD6	2.45511e-06	0.152483	0.173	0.098	0.0898595
TRAK1	2.51185e-06	0.117191	0.101	0.047	0.0919362
CD2BP2	2.60239e-06	0.21249	0.235	0.147	0.09525
MGAT1	2.69183e-06	0.309187	0.353	0.252	0.0985236
ANXA4	2.69728e-06	-0.199817	0.157	0.266	0.0987232
HMOX2	2.70438e-06	0.222813	0.229	0.147	0.098983
CFLAR	2.7051e-06	-0.370091	0.394	0.494	0.0990094
CBX1	2.70634e-06	0.203393	0.242	0.153	0.0990548
DNAJB1	2.75893e-06	-0.477625	0.242	0.348	0.10098
TXN	2.75899e-06	-0.313425	0.616	0.698	0.100982
ELK3	2.89999e-06	-0.368534	0.647	0.708	0.106142
SELENOW	3.01028e-06	0.293053	0.91	0.924	0.110179
KDR	3.15973e-06	-0.244389	0.144	0.249	0.115649
FDPS	3.19125e-06	0.278328	0.51	0.407	0.116803
NDUFA7	3.37455e-06	0.27709	0.345	0.249	0.123512
H3F3A	3.42365e-06	0.230649	0.969	0.948	0.125309
ADM5	3.51246e-06	-0.358868	0.149	0.247	0.12856
EIF3L	3.5648e-06	-0.30354	0.332	0.447	0.130475
ZNF853	3.65074e-06	0.112605	0.028	0.007	0.133621
PALM2-AKAP2	3.72057e-06	-0.340758	0.549	0.625	0.136177
ALDH1A2	3.75481e-06	-0.190638	0.018	0.084	0.13743
LY96	3.90248e-06	-0.235035	0.085	0.175	0.142835
CTNNB1	3.90817e-06	0.244949	0.402	0.299	0.143043
SLC48A1	3.98143e-06	0.206875	0.191	0.115	0.145724
CIRBP	4.05013e-06	-0.259043	0.647	0.731	0.148239
HYAL2	4.13798e-06	0.247308	0.701	0.591	0.151454
EPB41L4A	4.16247e-06	-0.197601	0.062	0.146	0.152351
PLIN2	4.16766e-06	-0.267349	0.09	0.178	0.15254
ATPAF1	4.32542e-06	0.105115	0.077	0.033	0.158315
UGCG	4.35758e-06	-0.279724	0.085	0.174	0.159492
ISG20	4.42526e-06	0.15659	0.142	0.077	0.161969
TRIM24	4.81869e-06	-0.21375	0.052	0.131	0.176369
AC008555.4	4.86306e-06	-0.156795	0.013	0.074	0.177993
PBX2	4.93331e-06	0.152155	0.144	0.08	0.180564
AEBP2	5.03514e-06	0.166047	0.131	0.07	0.184291
MPP1	5.19562e-06	-0.158147	0.046	0.126	0.190165
HLA-C	5.27825e-06	0.181927	0.997	0.979	0.193189
EMILIN2	5.41776e-06	-0.202337	0.039	0.113	0.198295
TPST2	5.42096e-06	-0.248871	0.131	0.231	0.198412
IFIT3	5.42676e-06	0.323361	0.325	0.233	0.198625
BNC2	5.48892e-06	-0.147888	0.01	0.069	0.2009
ITPR1	5.70074e-06	0.222885	0.245	0.158	0.208653
ANKRD28	5.88083e-06	0.18131	0.253	0.163	0.215244
PMEPA1	6.5359e-06	0.181719	0.155	0.087	0.239221
TGFB1	6.70944e-06	0.239388	0.196	0.121	0.245572
MAOA	6.76185e-06	-0.223926	0.067	0.149	0.24749
TJP1	6.79876e-06	0.37323	0.665	0.594	0.248841
NAPA	7.1294e-06	0.211369	0.268	0.182	0.260943
CDC42EP2	7.13426e-06	-0.197894	0.054	0.133	0.261121
ZNF503	7.27754e-06	0.104038	0.101	0.049	0.266365
RFTN1	7.50174e-06	0.100646	0.131	0.07	0.274571
SERPING1	7.64251e-06	0.243346	0.557	0.457	0.279723
ARRDC2	7.64554e-06	-0.223795	0.113	0.208	0.279835
CCDC91	7.70211e-06	0.148542	0.103	0.051	0.281905
UBXN1	7.72831e-06	-0.318112	0.495	0.59	0.282864
AZIN1	7.82491e-06	0.163159	0.17	0.1	0.2864
FUNDC2	8.10291e-06	0.210776	0.387	0.284	0.296574
RHOQ	8.13472e-06	0.114201	0.072	0.031	0.297739
RAB11FIP1	8.7972e-06	-0.228669	0.062	0.14	0.321986
NR5A2	8.80362e-06	-0.189266	0.041	0.113	0.322221
PLCXD3	8.92346e-06	-0.18968	0.005	0.058	0.326608
AMPD2	9.00289e-06	0.104908	0.041	0.014	0.329515
PRKAR1B	9.10606e-06	-0.204072	0.052	0.126	0.333291
UHRF2	9.35205e-06	-0.235818	0.08	0.165	0.342294
BRD2	9.54954e-06	-0.256905	0.253	0.364	0.349523
INPP5K	9.65328e-06	0.161959	0.193	0.117	0.35332
TRAM2	9.89182e-06	0.125016	0.113	0.059	0.362051
DUSP6	1.01163e-05	0.409773	0.296	0.212	0.370266
SEPTIN7	1.06257e-05	-0.266903	0.66	0.744	0.388912
FBXO34	1.06264e-05	0.226802	0.209	0.133	0.388937
CNIH1	1.10289e-05	-0.265769	0.129	0.221	0.40367
FDFT1	1.12379e-05	0.207717	0.165	0.099	0.41132
ITGB3	1.13428e-05	0.126475	0.085	0.04	0.415158
NASP	1.15081e-05	-0.301856	0.485	0.575	0.42121
AKAP12	1.16931e-05	-0.267797	0.082	0.168	0.427979
STX12	1.2299e-05	0.155395	0.196	0.121	0.450154
SERP1	1.23948e-05	-0.259423	0.286	0.394	0.453664
FRYL	1.24457e-05	0.28458	0.291	0.203	0.455526
PPP1R21	1.25794e-05	0.142654	0.137	0.075	0.460418
CDC42	1.28001e-05	0.244417	0.814	0.764	0.468498
UQCC2	1.28825e-05	0.118788	0.103	0.052	0.471514
COPZ2	1.31491e-05	-0.171963	0.057	0.132	0.481271
AC005332.6	1.31612e-05	0.148101	0.103	0.052	0.481715
MCAM	1.32457e-05	-0.273404	0.219	0.324	0.484806
RYR3	1.32991e-05	-0.157556	0.013	0.07	0.486762
EIF2S2	1.35284e-05	-0.312159	0.508	0.585	0.495152
CPLX1	1.37328e-05	-0.249791	0.09	0.176	0.502633
ZBTB20	1.37861e-05	-0.304356	0.356	0.451	0.504585
JAK3	1.40896e-05	-0.134937	0.003	0.051	0.515695
HLTF	1.59362e-05	0.140627	0.137	0.076	0.583282
DHRS7	1.60736e-05	-0.294894	0.34	0.435	0.588309
HMGB3	1.60968e-05	0.132497	0.077	0.035	0.589159
ARPC2	1.61994e-05	0.266651	0.608	0.546	0.592914
ENPP4	1.66619e-05	0.159809	0.173	0.105	0.609842
LMAN1	1.67875e-05	-0.323251	0.294	0.39	0.61444
ARFGEF3	1.73968e-05	-0.180137	0.026	0.087	0.636741
SASH1	1.78892e-05	-0.310475	0.327	0.429	0.654764
GIPC2	1.79337e-05	0.178904	0.224	0.146	0.656392
HINT1	1.81298e-05	-0.281917	0.747	0.798	0.66357
CDK2AP1	1.81703e-05	0.251719	0.353	0.258	0.665052
ADGRG6	1.82015e-05	-0.136908	0.003	0.05	0.666192
SOCS3	1.83525e-05	-0.365486	0.688	0.76	0.671719
CACUL1	1.86016e-05	0.106978	0.139	0.078	0.680836
ANKRD40	1.86524e-05	0.148235	0.147	0.084	0.682695
SAMD9	1.86632e-05	0.170305	0.165	0.099	0.683093
MRAP2	1.89067e-05	-0.131011	0.003	0.05	0.692005
RAPGEF1	1.89882e-05	0.25657	0.247	0.168	0.694986
TBX1	1.93266e-05	-0.316526	0.25	0.351	0.707373
PRXL2C	1.98805e-05	0.231806	0.289	0.201	0.727645
DOCK1	1.99232e-05	0.194786	0.258	0.175	0.729207
RAB11FIP5	2.00035e-05	-0.183498	0.07	0.148	0.732147
UBE2V1	2.00423e-05	-0.308054	0.397	0.498	0.733569
ARHGEF3	2.13637e-05	-0.206281	0.152	0.247	0.781932
SMAD9	2.17216e-05	-0.189727	0.054	0.127	0.795031
SSBP3	2.21175e-05	-0.199536	0.07	0.147	0.809522
HSPA12B	2.21841e-05	0.202762	0.253	0.17	0.811959
ARHGAP29	2.21978e-05	-0.33165	0.639	0.679	0.812462
CPE	2.22498e-05	-0.246289	0.015	0.071	0.814365
CYB5R3	2.23053e-05	0.266899	0.698	0.631	0.816395
RAPGEF4	2.23924e-05	-0.141151	0.057	0.13	0.819585
AKT3	2.24639e-05	-0.281651	0.16	0.252	0.8222
FCSK	2.26303e-05	0.119737	0.054	0.021	0.828291
CRTAC1	2.32092e-05	-0.199086	0.005	0.054	0.849482
PABPC4	2.3419e-05	-0.222632	0.149	0.245	0.857158
FLNC	2.39205e-05	0.181694	0.131	0.074	0.875515
HLA-E	2.39585e-05	0.189363	0.99	0.991	0.876905
STAT1	2.44934e-05	0.233367	0.232	0.154	0.896483
C1orf115	2.51129e-05	-0.25797	0.302	0.395	0.919158
OAS3	2.51352e-05	0.149638	0.131	0.074	0.919974
CXXC5	2.55833e-05	-0.208434	0.077	0.156	0.936373
RCOR1	2.57186e-05	0.143113	0.106	0.055	0.941325
CEP85L	2.59248e-05	0.176581	0.224	0.146	0.948875
STARD3NL	2.63751e-05	0.157892	0.144	0.084	0.965356
YBX3	2.66333e-05	0.238385	0.876	0.826	0.974804
FEM1C	2.67348e-05	0.148779	0.106	0.055	0.978521
MSANTD3	2.68533e-05	0.153334	0.103	0.053	0.982858
TSC22D3	2.75912e-05	-0.396648	0.531	0.596	1
KPNB1	2.76796e-05	-0.27838	0.183	0.278	1
MYL6	2.79846e-05	0.229567	0.936	0.944	1
TMCC1	2.83953e-05	0.140156	0.095	0.048	1
NNMT	2.85579e-05	-0.457468	0.214	0.303	1
DNAJC2	2.88807e-05	0.160759	0.186	0.116	1
SAT2	2.92925e-05	-0.255331	0.188	0.281	1
UCK2	2.94612e-05	-0.138775	0.018	0.074	1
MLXIP	2.99498e-05	-0.196164	0.052	0.122	1
FAM214A	3.00073e-05	0.125675	0.165	0.099	1
GGCT	3.0139e-05	-0.253174	0.137	0.223	1
BEX3	3.10168e-05	0.339352	0.289	0.206	1
NDUFC1	3.10503e-05	0.246652	0.57	0.495	1
BTG1	3.12318e-05	-0.340631	0.691	0.713	1
MDFIC	3.14712e-05	-0.254742	0.126	0.213	1
MANSC1	3.14738e-05	0.209335	0.242	0.163	1
EGLN1	3.14758e-05	-0.212407	0.186	0.284	1
AL445524.1	3.16105e-05	-0.185924	0.028	0.088	1
ST6GALNAC6	3.19222e-05	-0.206894	0.093	0.175	1
TJP2	3.21704e-05	0.148642	0.235	0.154	1
DUSP5	3.22752e-05	0.164505	0.175	0.108	1
LAMP2	3.34988e-05	0.212543	0.33	0.24	1
LYST	3.39325e-05	-0.291531	0.116	0.197	1
LAYN	3.4056e-05	-0.198226	0.057	0.128	1
CCDC3	3.51509e-05	0.222692	0.487	0.386	1
RNASE1	3.56076e-05	0.197831	0.946	0.887	1
CFL1	3.70773e-05	0.246208	0.892	0.862	1
POLR2J	3.75704e-05	0.158923	0.345	0.248	1
ADH5	3.85684e-05	0.178066	0.263	0.18	1
SLC22A23	3.8693e-05	-0.143253	0.01	0.06	1
ITSN1	3.88343e-05	-0.154418	0.023	0.08	1
SNRPF	3.94042e-05	-0.269664	0.423	0.512	1
NDUFAF3	4.10739e-05	0.240562	0.338	0.245	1
ARHGEF2	4.17324e-05	0.139927	0.142	0.082	1
EXOC3L2	4.18501e-05	-0.122423	0.003	0.046	1
FOS	4.24612e-05	0.247588	0.948	0.932	1
ENDOD1	4.25227e-05	-0.242918	0.18	0.273	1
MRPS18C	4.38425e-05	0.227355	0.433	0.336	1
TBC1D1	4.38729e-05	0.188113	0.211	0.14	1
PRR34-AS1	4.45912e-05	0.149684	0.16	0.096	1
LINC01197	4.48372e-05	-0.140808	0.021	0.076	1
LDHB	4.5204e-05	-0.231291	0.144	0.231	1
PLEKHO2	4.60401e-05	-0.15042	0.028	0.088	1
FGD6	4.66663e-05	-0.178261	0.044	0.108	1
BLOC1S1	4.78286e-05	0.248223	0.392	0.299	1
MCUR1	4.85541e-05	-0.20711	0.113	0.199	1
TBC1D15	4.93373e-05	-0.274293	0.24	0.34	1
RAB3IL1	4.93987e-05	-0.154874	0.028	0.087	1
GIMAP4	4.96264e-05	0.210722	0.809	0.735	1
PRR5	4.98615e-05	-0.136424	0.018	0.071	1
TMEM204	4.99114e-05	-0.311255	0.206	0.29	1
CYSLTR1	5.01023e-05	-0.136377	0.015	0.068	1
HSD3B7	5.14893e-05	-0.14958	0.018	0.071	1
SNHG1	5.23052e-05	-0.153851	0.026	0.083	1
ARID5A	5.23794e-05	0.210175	0.188	0.12	1
PLK2	5.24347e-05	-0.310566	0.289	0.379	1
RNF2	5.28517e-05	0.153678	0.098	0.051	1
RYBP	5.29e-05	-0.207839	0.147	0.237	1
RBMS2	5.32686e-05	-0.285874	0.175	0.261	1
ASPH	5.47229e-05	-0.271649	0.227	0.322	1
SYCE1L	5.56406e-05	-0.2004	0.031	0.089	1
PLEKHF1	5.5733e-05	-0.142698	0.021	0.075	1
ARHGDIB	5.59585e-05	-0.261354	0.255	0.353	1
JDP2	5.6241e-05	-0.169832	0.041	0.104	1
ZDHHC17	5.8676e-05	-0.234104	0.098	0.174	1
SERTAD2	5.87432e-05	-0.205944	0.111	0.195	1
DOCK6	5.87454e-05	0.177365	0.162	0.099	1
PCMTD2	5.97667e-05	-0.268266	0.119	0.194	1
RILPL2	6.0581e-05	0.200352	0.433	0.342	1
EIF2AK4	6.12816e-05	0.235257	0.294	0.212	1
APCDD1	6.28466e-05	0.178371	0.198	0.129	1
NDUFA13	6.32341e-05	0.209796	0.696	0.629	1
LSM7	6.3616e-05	0.277918	0.469	0.382	1
TNRC6C	6.52494e-05	0.192246	0.198	0.129	1
NR3C1	6.58708e-05	0.309255	0.394	0.307	1
ATP5MC2	6.59363e-05	-0.270116	0.706	0.766	1
FAM117A	6.59369e-05	-0.160119	0.044	0.107	1
TATDN1	6.61021e-05	-0.212685	0.075	0.145	1
RPA3	6.70639e-05	-0.161498	0.052	0.118	1
PDE4A	6.85734e-05	0.149119	0.113	0.063	1
EMP2	6.87499e-05	0.250498	0.58	0.498	1
EPHB4	6.93389e-05	-0.232185	0.191	0.28	1
RNF5	6.9605e-05	0.151232	0.201	0.13	1
CAMK2G	6.98127e-05	-0.160719	0.028	0.084	1
GBP5	7.00115e-05	-0.141975	0.013	0.062	1
CALCRL	7.00898e-05	-0.393658	0.327	0.41	1
CASKIN2	7.05374e-05	0.200691	0.224	0.151	1
PROS1	7.1117e-05	-0.224521	0.18	0.271	1
LSR	7.40019e-05	0.257707	0.317	0.239	1
EBF3	7.41396e-05	-0.288308	0.175	0.257	1
SLCO4A1	7.49385e-05	-0.179052	0.075	0.148	1
LRP10	7.50178e-05	-0.238147	0.242	0.337	1
ABRAXAS1	7.50273e-05	-0.195113	0.059	0.127	1
CYB5A	7.55223e-05	0.210542	0.366	0.273	1
CCM2L	7.71731e-05	0.234091	0.224	0.153	1
DDAH2	7.76536e-05	0.246408	0.376	0.29	1
LSM4	7.78707e-05	0.193762	0.304	0.219	1
ARPP19	7.96483e-05	0.22588	0.374	0.287	1
RPL36AL	8.14383e-05	-0.258075	0.763	0.799	1
HEXA	8.29327e-05	-0.265746	0.155	0.235	1
GATA2	8.3487e-05	0.255371	0.343	0.264	1
UBLCP1	8.60701e-05	0.140994	0.149	0.091	1
ABCG1	8.70368e-05	-0.203421	0.093	0.168	1
SHC1	8.7599e-05	-0.248269	0.175	0.262	1
HIRIP3	8.80825e-05	0.16286	0.155	0.095	1
PGRMC2	8.90868e-05	0.163207	0.312	0.224	1
KLF4	8.91856e-05	-0.392518	0.436	0.509	1
NBDY	8.932e-05	-0.235183	0.206	0.298	1
PLAC9	9.04841e-05	0.200056	0.358	0.269	1
NOB1	9.22791e-05	-0.20543	0.126	0.208	1
CCNY	9.23541e-05	0.237111	0.302	0.228	1
NOP56	9.53909e-05	-0.214641	0.149	0.234	1
HADHA	9.54884e-05	-0.278454	0.356	0.444	1
PALD1	9.75785e-05	-0.115993	0.013	0.06	1
AASS	9.82855e-05	-0.157006	0.057	0.122	1
RTF2	9.99216e-05	0.194777	0.41	0.32	1
ANXA2	0.000100441	-0.25209	0.879	0.901	1
TMEM256	0.000102381	-0.229561	0.193	0.286	1
TNFRSF6B	0.000102524	-0.285399	0.062	0.13	1
ABCB1	0.000103158	0.259647	0.343	0.262	1
ANO6	0.000103943	0.159025	0.224	0.152	1
EIF3F	0.00010627	-0.300198	0.495	0.568	1
TAX1BP1	0.000106535	0.188737	0.451	0.366	1
SFR1	0.000107714	0.115108	0.093	0.049	1
SLC25A3	0.000112923	-0.264167	0.593	0.673	1
DNASE1L3	0.000113576	-0.165139	0.018	0.067	1
ZMIZ1	0.000114045	-0.250162	0.173	0.255	1
ATP5MC3	0.000114091	0.18359	0.389	0.301	1
AKR1C3	0.000116737	-0.269825	0.438	0.521	1
NBEAL2	0.000119638	0.112359	0.088	0.046	1
KCNK5	0.000121152	-0.114865	0.005	0.046	1
ELOB	0.000125778	0.244786	0.796	0.734	1
PDE7B	0.000126336	-0.119315	0.013	0.059	1
TUBA4A	0.000127441	0.193052	0.229	0.158	1
SP100	0.000127726	0.249203	0.564	0.466	1
SERTAD1	0.000128004	-0.265288	0.24	0.331	1
MINDY2	0.000128173	-0.22479	0.103	0.176	1
DAPK3	0.000129171	0.134103	0.18	0.115	1
ARHGAP18	0.000130482	-0.211324	0.07	0.135	1
NAV3	0.000132107	-0.104078	0.005	0.046	1
DEXI	0.000132923	0.160408	0.165	0.104	1
MCFD2	0.000133068	-0.247571	0.18	0.265	1
NAPG	0.000133129	0.141096	0.209	0.139	1
CAV2	0.000133281	0.228649	0.619	0.537	1
STXBP1	0.000135654	-0.147494	0.067	0.135	1
CPTP	0.000135754	-0.182802	0.085	0.155	1
SKIL	0.000139687	0.173058	0.343	0.258	1
NT5C	0.000140325	-0.198051	0.085	0.154	1
EIF3D	0.000140839	-0.20434	0.363	0.457	1
MAPK14	0.000141303	0.167924	0.175	0.113	1
ADGRA2	0.000146083	-0.249268	0.095	0.167	1
RB1	0.000146575	0.179638	0.26	0.186	1
MAGI2-AS3	0.000147353	0.224597	0.242	0.17	1
FUCA2	0.000147662	0.143429	0.157	0.098	1
ZNF433-AS1	0.00014955	-0.121916	0.015	0.062	1
B4GALT1	0.000149893	0.164298	0.193	0.129	1
USP18	0.000150336	0.12661	0.059	0.027	1
DYSF	0.00015034	-0.111383	0.034	0.09	1
CPD	0.000152165	-0.210448	0.101	0.172	1
CCDC124	0.000152567	0.195789	0.299	0.221	1
MCL1	0.000156874	0.247059	0.474	0.393	1
NAP1L1	0.000159966	-0.23012	0.652	0.693	1
TIMM8B	0.000160397	0.184733	0.33	0.247	1
TINF2	0.000162436	0.142444	0.152	0.094	1
EIF4A1	0.000164991	-0.201135	0.727	0.773	1
SCARF1	0.000165701	-0.240066	0.124	0.201	1
H6PD	0.00016696	-0.159001	0.057	0.121	1
ERF	0.000168016	-0.214247	0.126	0.204	1
OBI1	0.000171171	0.141108	0.121	0.071	1
VIM	0.000175248	-0.125743	1	1	1
SELENOK	0.000176455	0.146223	0.461	0.369	1
PRMT2	0.000176622	0.271213	0.433	0.354	1
DENND3	0.000185368	0.128522	0.101	0.055	1
HLA-DOA	0.000186221	-0.10448	0.013	0.058	1
TSPAN3	0.000188081	0.161625	0.232	0.16	1
C20orf204	0.000189394	-0.140211	0.026	0.077	1
CAMKK1	0.000189548	-0.119297	0.013	0.057	1
ATP5F1D	0.000189936	-0.265137	0.523	0.601	1
FTL	0.000192702	-0.196435	0.972	0.977	1
DDX5	0.000193638	0.170455	0.897	0.891	1
EGR2	0.000195913	0.118111	0.062	0.029	1
DNM3	0.000196857	-0.130298	0.031	0.084	1
GLRX5	0.000200371	0.116631	0.263	0.187	1
PMAIP1	0.000205127	-0.140295	0.023	0.073	1
HERPUD1	0.000205181	0.351791	0.389	0.313	1
DDIT4	0.000206577	0.313877	0.335	0.257	1
PSMB6	0.000208831	0.204948	0.49	0.408	1
TUBB2A	0.000209842	-0.202105	0.08	0.147	1
CRHBP	0.000210113	-0.104828	0.003	0.039	1
GIT2	0.000210364	0.145561	0.165	0.106	1
MRPL11	0.000212175	-0.222413	0.134	0.209	1
SMIM26	0.000212472	-0.279132	0.278	0.361	1
USHBP1	0.000213408	0.114995	0.155	0.095	1
AP1AR	0.00021417	-0.168519	0.052	0.111	1
MAP3K3	0.000215294	-0.230831	0.16	0.234	1
YIF1A	0.000217062	0.13314	0.224	0.154	1
PXN	0.000218158	-0.21094	0.144	0.223	1
BZW2	0.000221042	-0.228047	0.116	0.186	1
ZYX	0.00022231	0.154167	0.191	0.128	1
LRRC8A	0.000223451	0.13516	0.235	0.165	1
RTRAF	0.000225657	-0.246722	0.402	0.483	1
EHD2	0.000225763	0.248065	0.482	0.39	1
TSPYL5	0.000227646	-0.120511	0.023	0.072	1
ZSCAN18	0.00022771	0.147964	0.204	0.137	1
IFIT1	0.000228564	0.203052	0.258	0.186	1
ANXA6	0.000228847	-0.147233	0.036	0.09	1
TMOD1	0.000237625	-0.182472	0.057	0.118	1
SH3RF3	0.000243699	-0.116002	0.005	0.043	1
TRIOBP	0.000247423	-0.245863	0.183	0.261	1
ZNF581	0.000248418	-0.152924	0.052	0.111	1
ELMO1	0.000253634	0.167462	0.253	0.181	1
CSF1	0.000254791	-0.132036	0.082	0.151	1
EXOC5	0.000255308	-0.169705	0.049	0.106	1
ATOH8	0.000256293	-0.199284	0.049	0.105	1
EIF3H	0.000257018	-0.249957	0.459	0.535	1
MBOAT2	0.000257906	-0.133634	0.034	0.086	1
GPM6A	0.000261151	-0.157044	0.015	0.059	1
DDB2	0.000263702	-0.168571	0.049	0.106	1
EPSTI1	0.000265021	0.147355	0.124	0.073	1
GALNT15	0.000266982	-0.168645	0.041	0.097	1
SNAPIN	0.000269556	0.143218	0.168	0.107	1
PMF1	0.000274682	-0.158356	0.103	0.173	1
PDGFB	0.000276057	0.175026	0.541	0.441	1
PRXL2B	0.000277449	-0.141044	0.054	0.113	1
FNBP1	0.000278624	0.169699	0.224	0.157	1
ANP32A	0.00028302	-0.286233	0.317	0.388	1
LRRTM2	0.000286043	-0.1222	0.01	0.051	1
PWWP2B	0.000287921	0.130509	0.119	0.071	1
NIBAN2	0.000289657	-0.188821	0.152	0.231	1
IRF9	0.000292084	0.223937	0.294	0.223	1
ZNF428	0.000294403	0.233603	0.276	0.206	1
PPP1R18	0.000295783	-0.212091	0.152	0.228	1
EEF1E1	0.000295794	0.161641	0.201	0.137	1
WDR74	0.000296005	-0.267889	0.219	0.305	1
EGLN3	0.000296319	-0.14197	0.034	0.085	1
HINT2	0.000298253	0.176837	0.245	0.174	1
SELENOP	0.000302661	-0.231049	0.304	0.389	1
B2M	0.000302999	0.128537	1	1	1
LINC02147	0.000303758	-0.124817	0.01	0.05	1
CEBPG	0.000308702	0.141867	0.242	0.171	1
ATP6V1G1	0.000310719	0.206127	0.613	0.522	1
ENY2	0.00031097	-0.260503	0.433	0.526	1
SLC29A1	0.000311028	-0.209719	0.108	0.176	1
TSPAN6	0.000313925	-0.166668	0.062	0.123	1
PDCD6IP	0.000317959	0.166038	0.332	0.253	1
SSBP4	0.000319116	0.148134	0.237	0.167	1
BCAP29	0.000321964	0.172229	0.446	0.354	1
ID3	0.000323864	-0.321468	0.809	0.845	1
IMPDH1	0.000325691	0.18083	0.08	0.042	1
RALB	0.000327302	0.158464	0.343	0.262	1
VPS37B	0.000329614	0.121922	0.162	0.104	1
SH2B3	0.000329759	0.111158	0.121	0.072	1
PNP	0.000330534	0.187967	0.273	0.203	1
RAB30	0.000334278	0.128718	0.072	0.037	1
LRG1	0.000335961	-0.200812	0.015	0.058	1
CDC42EP4	0.000336167	-0.179894	0.098	0.165	1
MARVELD1	0.000339073	-0.111122	0.015	0.059	1
COX4I1	0.000341981	-0.208661	0.83	0.861	1
PYCARD	0.000351537	-0.230162	0.111	0.178	1
ATP5F1A	0.00035477	-0.165162	0.356	0.444	1
GRASP	0.000356495	-0.290632	0.469	0.545	1
IGBP1	0.000360383	-0.208518	0.201	0.281	1
PPM1G	0.000361816	-0.174977	0.258	0.345	1
CMTM3	0.000363541	-0.172816	0.057	0.115	1
PREX2	0.000363782	0.159804	0.425	0.337	1
BID	0.000365255	-0.16937	0.077	0.142	1
NAA38	0.000368513	0.248646	0.613	0.546	1
LINC01985	0.000373564	-0.115317	0.01	0.05	1
CDKN2D	0.000375851	0.204904	0.211	0.148	1
GNB1	0.000377087	0.193037	0.564	0.486	1
TUBA1A	0.000389156	0.196215	0.567	0.476	1
JPT1	0.000392063	-0.139165	0.039	0.091	1
SOWAHC	0.000392069	-0.108607	0.013	0.053	1
YIF1B	0.000392321	0.112107	0.149	0.095	1
MRPS12	0.000394128	-0.211551	0.129	0.2	1
PLEKHA7	0.000399466	-0.100024	0.015	0.058	1
EIF3M	0.000404646	-0.255326	0.273	0.346	1
GSPT1	0.000407236	-0.180281	0.147	0.222	1
TUBB	0.000409043	-0.238147	0.634	0.689	1
KRT7	0.000409979	-0.169143	0.031	0.079	1
DUSP11	0.000410622	0.156322	0.144	0.092	1
COMT	0.000412573	0.132286	0.229	0.161	1
MAOB	0.000416465	-0.125691	0.039	0.091	1
TMEM184B	0.000418288	0.102989	0.157	0.101	1
SMAD6	0.000420592	0.103417	0.082	0.044	1
TXNL4A	0.000420699	0.19901	0.286	0.219	1
DPYSL2	0.000421791	-0.2344	0.716	0.753	1
HIF3A	0.000423182	0.123754	0.188	0.127	1
CLEC2B	0.000429509	-0.254855	0.405	0.488	1
KCNB1	0.000436291	-0.102469	0.003	0.036	1
LINC01116	0.000442112	0.15247	0.276	0.201	1
PPM1F	0.000442407	-0.149154	0.103	0.17	1
KPNA3	0.000445009	-0.164253	0.149	0.222	1
MED16	0.000448179	-0.138856	0.026	0.072	1
TOMM7	0.000465018	-0.191983	0.845	0.873	1
DNAJA1	0.000484549	-0.35732	0.575	0.626	1
SELENOH	0.000486026	-0.21218	0.41	0.498	1
ECE1	0.000490518	0.235293	0.631	0.578	1
CA5B	0.000490786	0.209374	0.186	0.127	1
LINC01013	0.000496471	-0.183138	0.044	0.097	1
FPGS	0.000500691	0.111441	0.103	0.06	1
SLC41A3	0.000506638	-0.217218	0.116	0.181	1
PTPN14	0.000518688	0.134395	0.219	0.155	1
SAMD12	0.000519338	0.117595	0.088	0.049	1
PTGIS	0.000525281	-0.183535	0.036	0.086	1
GYPC	0.000526265	-0.205585	0.137	0.209	1
FCHSD2	0.000529966	0.107762	0.129	0.079	1
EIF3G	0.000533626	-0.224857	0.528	0.606	1
SLC3A2	0.000536748	-0.270507	0.405	0.488	1
SYNGR2	0.000541627	-0.224454	0.412	0.486	1
CARD19	0.000542114	-0.236546	0.211	0.29	1
OSBPL5	0.000543772	-0.165007	0.041	0.091	1
IFNGR1	0.000545121	0.164942	0.33	0.252	1
C1orf54	0.000546408	-0.124869	0.023	0.068	1
ZNF827	0.000550236	0.137711	0.052	0.024	1
MPDZ	0.000572668	-0.20282	0.142	0.214	1
EIF3I	0.000581073	-0.240964	0.309	0.393	1
YPEL2	0.000587537	-0.201875	0.152	0.225	1
ZNF518A	0.000590914	0.115781	0.121	0.074	1
LPP	0.000591811	0.205969	0.286	0.218	1
REEP1	0.000599635	-0.102634	0.005	0.039	1
GFOD2	0.000608677	-0.185637	0.119	0.19	1
AC110611.2	0.000614044	-0.125971	0.023	0.067	1
OST4	0.000616005	-0.264396	0.601	0.655	1
JMJD1C	0.000621687	0.155946	0.363	0.286	1
EDNRB	0.000622533	-0.176182	0.077	0.139	1
UBE2J1	0.000627963	0.177186	0.247	0.182	1
REEP5	0.000633904	0.188572	0.433	0.347	1
CTSF	0.00063803	-0.167906	0.067	0.125	1
CALCOCO2	0.000640084	-0.272492	0.335	0.411	1
HLF	0.000648835	-0.125486	0.021	0.063	1
NELFB	0.000649962	0.133488	0.16	0.105	1
SLPI	0.000653372	-0.11486	0.031	0.077	1
CTBP2	0.000653893	0.147846	0.271	0.202	1
KIAA0040	0.000655358	-0.176312	0.059	0.115	1
TMEM18	0.000661108	-0.183358	0.16	0.232	1
CMPK1	0.000663306	-0.217795	0.209	0.286	1
MPZL1	0.000674898	0.112169	0.18	0.122	1
FLRT2	0.000677677	-0.103903	0.015	0.055	1
LAMA3	0.000684141	-0.134405	0.034	0.081	1
CDYL	0.00069312	-0.181141	0.111	0.176	1
LAMP1	0.000700891	0.123256	0.541	0.445	1
SMAD7	0.0007097	0.155855	0.165	0.111	1
L3MBTL3	0.000710827	0.100103	0.046	0.021	1
MAPK11	0.000711787	-0.125799	0.077	0.138	1
RAB3GAP1	0.000719889	0.15973	0.155	0.103	1
HAGH	0.000728904	0.128553	0.178	0.121	1
CHMP2B	0.000732215	0.21771	0.291	0.218	1
TEK	0.000734941	0.120786	0.255	0.184	1
UBTD1	0.000735765	-0.15798	0.049	0.1	1
ZFAND1	0.000745131	-0.160589	0.101	0.163	1
MPST	0.000759214	-0.159833	0.09	0.153	1
CFAP410	0.000770958	0.127623	0.075	0.04	1
SNX3	0.000787287	0.194116	0.557	0.487	1
H2AFX	0.000793382	-0.117739	0.039	0.088	1
CAMK2D	0.000793695	0.101291	0.165	0.11	1
PTPRE	0.000824672	-0.205697	0.134	0.199	1
SRP72	0.000827768	0.2012	0.374	0.298	1
FAM167B	0.000836346	-0.101303	0.028	0.073	1
BAZ2A	0.000837784	-0.203859	0.121	0.185	1
MICOS10	0.000839628	0.177016	0.528	0.458	1
SNHG12	0.000839989	-0.143094	0.036	0.083	1
ATP6V1A	0.000843887	0.118117	0.144	0.094	1
ODF2L	0.000844552	-0.174932	0.17	0.243	1
GTF3C6	0.000856014	0.172836	0.235	0.173	1
CPT1A	0.000871911	-0.16796	0.126	0.193	1
HIST1H2AC	0.000874135	-0.123947	0.015	0.053	1
SLCO2B1	0.000884634	-0.138859	0.028	0.072	1
TPCN1	0.000885303	-0.102128	0.008	0.041	1
TMEM59	0.000886195	-0.22563	0.523	0.605	1
CRTAP	0.000890549	-0.171268	0.338	0.415	1
NCL	0.000891593	-0.233932	0.678	0.716	1
MRPS28	0.000892105	0.147576	0.157	0.105	1
TSTD2	0.000900652	0.100918	0.062	0.031	1
MAPRE2	0.000929671	-0.126836	0.039	0.086	1
BRI3	0.00093055	-0.196511	0.701	0.744	1
DYNLRB1	0.000941673	-0.265725	0.546	0.601	1
AHCTF1	0.000942117	0.141353	0.193	0.136	1
SECTM1	0.000966115	-0.144296	0.054	0.106	1
KTN1	0.000973659	-0.185244	0.776	0.813	1
JUP	0.000973935	0.140926	0.155	0.102	1
CRACR2B	0.000978611	-0.1882	0.126	0.191	1
TLN2	0.00100124	0.128944	0.129	0.083	1
KIAA1191	0.00101435	0.105083	0.126	0.08	1
SLC30A1	0.00102291	-0.165753	0.082	0.14	1
BTN3A2	0.00103939	-0.15588	0.126	0.195	1
CYGB	0.00106217	-0.17078	0.049	0.098	1
RAC1	0.00106511	0.196162	0.863	0.836	1
SCCPDH	0.00108172	0.100374	0.108	0.066	1
PHLDA1	0.00108721	-0.217573	0.075	0.13	1
DPP7	0.00108867	0.137862	0.32	0.244	1
CAPZB	0.00109097	-0.115749	0.42	0.52	1
SERPINI1	0.00109592	-0.114576	0.026	0.067	1
RAB30-DT	0.00111384	0.131209	0.09	0.053	1
ABI1	0.00114195	0.119923	0.232	0.167	1
MTDH	0.00114438	-0.216581	0.536	0.604	1
RAB11B	0.00114787	0.154576	0.263	0.199	1
SURF1	0.00114889	0.147943	0.124	0.078	1
MAP1LC3A	0.00116781	-0.192128	0.155	0.222	1
ADGRG1	0.00116837	0.115196	0.227	0.163	1
EIF2A	0.00117733	-0.226869	0.25	0.322	1
PRNP	0.00118457	-0.132923	0.08	0.137	1
MAGI1	0.00119376	-0.214459	0.245	0.313	1
SPSB1	0.0012085	-0.101882	0.013	0.048	1
ACADS	0.00121485	-0.11999	0.046	0.094	1
DLC1	0.00121703	-0.18698	0.07	0.123	1
KLF7	0.00124644	-0.140389	0.139	0.207	1
GPRC5B	0.00125419	0.168045	0.191	0.134	1
INF2	0.00125458	-0.169583	0.064	0.117	1
HMGN1	0.00127925	0.122796	0.552	0.47	1
STX3	0.00129021	-0.116164	0.044	0.092	1
SNRPB	0.00130286	-0.202228	0.423	0.488	1
CASP3	0.00130387	-0.123448	0.044	0.091	1
TNFAIP3	0.00130558	-0.14312	0.049	0.099	1
NPDC1	0.00130577	-0.222514	0.794	0.813	1
KL	0.00130938	-0.113338	0.028	0.071	1
MALT1	0.00131955	-0.153284	0.142	0.211	1
SENCR	0.00132234	-0.126827	0.046	0.094	1
REV3L	0.00134485	-0.147009	0.124	0.19	1
IGKC	0.00135189	-0.17036	0.018	0.056	1
PPIB	0.00137747	-0.224873	0.608	0.638	1
MGAT4A	0.00140541	-0.156417	0.106	0.168	1
TOP1	0.00141434	-0.212867	0.198	0.266	1
PLSCR1	0.00141879	-0.187628	0.392	0.457	1
CANX	0.00143074	-0.240221	0.51	0.568	1
KDM7A	0.00144594	-0.148697	0.041	0.087	1
NUMB	0.00144994	0.115386	0.209	0.15	1
POLR2M	0.00147789	-0.151747	0.075	0.128	1
ITPRIP	0.00148551	0.141007	0.098	0.059	1
FBN1	0.00149017	0.113207	0.186	0.128	1
AL359220.1	0.00151	-0.15041	0.041	0.086	1
ABI2	0.00151239	0.103589	0.144	0.095	1
PTTG1IP	0.00151483	0.16224	0.642	0.583	1
SGK1	0.00152657	0.150691	0.168	0.116	1
LATS1	0.0015357	0.123269	0.116	0.073	1
FBXL7	0.0015438	-0.102843	0.034	0.077	1
NAMPT	0.00154876	-0.213597	0.173	0.238	1
VPS53	0.00156656	0.107166	0.101	0.061	1
SEC61G	0.00157134	0.162761	0.497	0.424	1
VAMP3	0.00157638	-0.242566	0.351	0.416	1
AKR1A1	0.00158062	-0.182263	0.198	0.267	1
TNFAIP1	0.00159062	-0.196223	0.16	0.224	1
SP3	0.00160971	-0.192007	0.149	0.214	1
HCFC1R1	0.00161489	0.114097	0.255	0.189	1
LZTS2	0.00164191	-0.141275	0.064	0.116	1
PNPLA2	0.00167221	-0.218436	0.209	0.274	1
A4GALT	0.00167568	-0.143664	0.191	0.265	1
MRPL45	0.00168699	-0.110144	0.059	0.11	1
CHST15	0.00170675	-0.102237	0.034	0.077	1
IL15	0.00174443	-0.12127	0.034	0.076	1
PDLIM3	0.0017457	0.132866	0.211	0.152	1
CLPTM1L	0.00177076	0.190304	0.162	0.111	1
IFI35	0.00177697	0.152868	0.224	0.164	1
PEAR1	0.00178754	-0.152847	0.108	0.169	1
PSAP	0.00179663	0.145476	0.714	0.644	1
RAB40B	0.00181961	0.102857	0.103	0.064	1
CCDC50	0.0018312	-0.253977	0.428	0.49	1
RPS19BP1	0.001841	-0.220284	0.265	0.335	1
SLC39A3	0.00184618	0.111975	0.124	0.08	1
GBP2	0.00188353	-0.198852	0.281	0.356	1
TMEM209	0.00188483	0.100874	0.077	0.044	1
RAPGEF2	0.00188689	0.105289	0.178	0.124	1
LIMS2	0.00188808	0.202722	0.438	0.373	1
SPRY2	0.0018884	-0.102707	0.031	0.072	1
CFAP298	0.00192835	0.13663	0.284	0.215	1
DCTN3	0.00196296	0.146923	0.371	0.3	1
MRPS10	0.00197131	0.159026	0.242	0.179	1
ARHGAP1	0.0019864	-0.127224	0.054	0.102	1
RNF115	0.00199108	-0.139866	0.183	0.252	1
PAX8-AS1	0.00200512	0.120992	0.082	0.048	1
C4orf3	0.0020224	0.162818	0.508	0.438	1
IFITM1	0.00202416	0.178078	0.418	0.346	1
HSBP1	0.00203661	0.15137	0.42	0.346	1
MYO9B	0.002053	0.144423	0.108	0.068	1
SMDT1	0.00206253	-0.273036	0.394	0.461	1
TMEM101	0.0020811	-0.148284	0.082	0.137	1
COQ4	0.0021297	-0.137733	0.064	0.115	1
RUSC1	0.00214042	0.112267	0.111	0.07	1
ABCD4	0.00218007	-0.187834	0.129	0.188	1
SNX4	0.00218524	0.133187	0.124	0.081	1
NEAT1	0.00220476	0.172791	0.943	0.91	1
PROX1	0.00220939	-0.160342	0.095	0.152	1
MGP	0.00222423	-0.392542	0.856	0.913	1
ADM	0.00224018	-0.143026	0.039	0.082	1
LTBR	0.00224941	-0.187644	0.193	0.261	1
TMOD3	0.00225133	0.122688	0.74	0.673	1
PTPRK	0.00227332	-0.177307	0.131	0.192	1
EIF2B2	0.00227824	-0.129263	0.046	0.092	1
NDRG2	0.002279	-0.137831	0.077	0.132	1
GPS2	0.00228893	0.159956	0.433	0.358	1
DELE1	0.00228946	-0.153027	0.072	0.123	1
KNOP1	0.00229497	0.205329	0.278	0.217	1
LPCAT4	0.00230458	-0.116968	0.041	0.085	1
EGR1	0.00233947	0.343373	0.492	0.425	1
RICTOR	0.00236024	0.154393	0.175	0.124	1
AFAP1	0.00237663	-0.128793	0.046	0.091	1
CIB1	0.00239505	0.183673	0.289	0.225	1
TPRKB	0.00239698	0.109915	0.26	0.196	1
C14orf132	0.00240471	-0.119384	0.036	0.077	1
STK17A	0.00241502	-0.125895	0.095	0.153	1
ZBTB8A	0.00243973	-0.163754	0.08	0.132	1
YPEL1	0.00244284	-0.100058	0.023	0.06	1
NUDCD1	0.00247209	-0.118623	0.085	0.139	1
SPTLC2	0.00248563	-0.128937	0.162	0.227	1
SUPT4H1	0.00251684	-0.175608	0.198	0.264	1
CITED2	0.00254514	-0.145139	0.054	0.1	1
ACAP2	0.00255823	-0.181734	0.206	0.275	1
MYADM	0.00256711	0.104227	0.34	0.269	1
AC108134.3	0.00256985	0.164792	0.077	0.045	1
AGTPBP1	0.00257141	0.106251	0.106	0.066	1
COX7A2	0.00257706	0.149557	0.698	0.654	1
PDE4B	0.00260303	-0.168369	0.07	0.118	1
TPBG	0.00262528	-0.134778	0.064	0.113	1
EPB41L2	0.00262714	0.124102	0.175	0.125	1
YAP1	0.00263326	0.10792	0.162	0.114	1
PLXNB2	0.00263762	-0.121984	0.062	0.11	1
MTR	0.00263956	0.137472	0.157	0.108	1
CYB561	0.00265391	0.167095	0.247	0.185	1
RNASEH1	0.0026664	-0.124994	0.07	0.12	1
IRF7	0.00266981	0.122215	0.124	0.082	1
LMNA	0.00267496	-0.121824	0.956	0.933	1
TPD52	0.00268363	-0.132311	0.113	0.172	1
GPR68	0.00270568	-0.167487	0.126	0.186	1
FARP1	0.00271856	-0.129557	0.064	0.113	1
CD93	0.0027266	0.156228	0.559	0.496	1
COQ8A	0.00277592	-0.143013	0.054	0.099	1
DSEL	0.00277645	-0.1141	0.021	0.055	1
ZADH2	0.00278287	0.124342	0.116	0.075	1
CSF3	0.002823	-0.157465	0.013	0.045	1
GLCE	0.00283464	-0.121828	0.039	0.079	1
PHC2	0.00285846	-0.18493	0.162	0.223	1
GNAQ	0.00286159	0.181093	0.477	0.41	1
GAB1	0.0028807	-0.168493	0.062	0.107	1
RHOA	0.00290512	0.190539	0.771	0.757	1
NFKB2	0.00290554	-0.149642	0.057	0.103	1
FGR	0.00293317	0.111049	0.088	0.053	1
DYNC1LI1	0.00297222	0.114823	0.276	0.21	1
NUDCD2	0.00300343	0.129473	0.219	0.162	1
HERC5	0.00300382	0.150992	0.206	0.152	1
SLC25A5	0.0030075	-0.166551	0.361	0.426	1
CDV3	0.00300868	-0.22425	0.405	0.469	1
STX4	0.00301784	-0.135511	0.103	0.16	1
TNRC6B	0.00302901	-0.216665	0.361	0.427	1
SYPL1	0.0030299	-0.202673	0.33	0.4	1
KIFC3	0.00304127	-0.124598	0.052	0.097	1
SEMA6B	0.00305232	-0.141567	0.08	0.131	1
ULK1	0.00307192	0.10354	0.131	0.088	1
RBM22	0.00307278	-0.162406	0.178	0.243	1
PARP14	0.00308147	0.162609	0.343	0.28	1
EGFL7	0.0031269	-0.231849	0.897	0.89	1
LITAF	0.00313767	-0.174006	0.093	0.145	1
N4BP1	0.00314309	-0.143468	0.108	0.165	1
TMEM245	0.00315296	-0.197486	0.152	0.209	1
MAPKAPK5-AS1	0.00317173	-0.182393	0.09	0.141	1
CCDC88A	0.00323132	0.101469	0.229	0.17	1
FAXDC2	0.00323595	-0.112914	0.052	0.096	1
RAB8B	0.0032362	-0.140796	0.093	0.146	1
SRGAP2B	0.00324667	-0.134111	0.072	0.122	1
HDDC2	0.00332137	0.105555	0.088	0.053	1
KLHL3	0.00338514	-0.116955	0.052	0.096	1
UBL7	0.00339904	0.135277	0.108	0.069	1
IFT52	0.00341317	0.10299	0.124	0.082	1
ADI1	0.00342862	0.174764	0.242	0.187	1
COX7B	0.00344183	0.182551	0.552	0.492	1
SON	0.00346731	0.189165	0.784	0.748	1
ICA1	0.003484	-0.232855	0.209	0.268	1
NSUN6	0.00348411	-0.141685	0.124	0.186	1
MYH9	0.00350208	-0.225551	0.649	0.695	1
HIF1A	0.00352406	-0.223472	0.186	0.244	1
GPAA1	0.00355505	0.110722	0.214	0.159	1
EFR3A	0.00356499	-0.114625	0.044	0.085	1
JAZF1	0.00361155	0.112214	0.08	0.048	1
LGALS9	0.00361633	0.139297	0.25	0.192	1
THAP5	0.00361795	0.14349	0.17	0.121	1
GPATCH11	0.00362092	-0.102187	0.075	0.125	1
ZNF706	0.00371394	-0.233184	0.399	0.45	1
ACO2	0.00373478	0.112107	0.121	0.08	1
ZNF462	0.00374008	-0.149808	0.101	0.155	1
MORC3	0.00377024	-0.127394	0.054	0.098	1
NARF	0.00377266	-0.145116	0.098	0.149	1
CDKN1A	0.00379253	-0.256784	0.265	0.329	1
MARCH8	0.0038061	-0.1215	0.026	0.061	1
SH3GLB2	0.00385069	0.160191	0.17	0.122	1
VOPP1	0.00391274	0.109192	0.196	0.144	1
BEND7	0.00391821	0.121089	0.129	0.087	1
TAF7	0.00394133	-0.241678	0.25	0.315	1
MRPS2	0.00396365	-0.16329	0.067	0.112	1
EOGT	0.00400679	0.107682	0.111	0.072	1
CAMLG	0.00402227	-0.168927	0.343	0.415	1
GBP3	0.00404209	-0.124187	0.062	0.107	1
NECTIN2	0.00404867	-0.17458	0.304	0.378	1
RNF125	0.00406288	-0.181789	0.101	0.151	1
COPRS	0.00407334	-0.168899	0.17	0.229	1
TCIM	0.00408715	0.105102	0.121	0.08	1
DDX19B	0.00410906	-0.110628	0.054	0.098	1
SOCS6	0.00412638	-0.104964	0.044	0.085	1
WNK1	0.00412699	-0.225687	0.436	0.496	1
FAM210B	0.0041748	-0.167894	0.162	0.223	1
ASXL1	0.00418704	-0.13851	0.134	0.193	1
EIF3J	0.00419564	-0.237329	0.338	0.395	1
SHOC2	0.00419639	0.104463	0.32	0.255	1
LMCD1	0.00420228	-0.194498	0.601	0.647	1
NFATC3	0.00422039	-0.116897	0.044	0.084	1
RAI2	0.00423647	0.100289	0.082	0.05	1
DCXR	0.00423979	-0.123439	0.057	0.101	1
ZNF524	0.0042428	-0.122498	0.147	0.207	1
PTGES3	0.00424932	-0.18699	0.531	0.602	1
ITGB1BP1	0.00427478	-0.180929	0.245	0.316	1
TMEM109	0.00430136	0.124136	0.451	0.382	1
SNHG26	0.00432916	-0.102453	0.044	0.085	1
NRM	0.00436485	-0.100827	0.039	0.078	1
ZBED5	0.00436577	0.130371	0.103	0.067	1
MYRIP	0.00437101	0.12809	0.255	0.199	1
LRRFIP1	0.00438296	0.175726	0.768	0.734	1
RIF1	0.00439261	-0.195535	0.17	0.229	1
TMEM185A	0.00439467	0.110121	0.077	0.046	1
MT-ND4L	0.00439783	-0.255216	0.655	0.705	1
ZBTB8OS	0.00443471	0.102953	0.18	0.13	1
DTX3L	0.00445231	0.103592	0.157	0.111	1
TNFSF10	0.00452605	-0.214752	0.75	0.789	1
MYO10	0.0045699	0.126351	0.116	0.077	1
KAZN	0.00461814	-0.10341	0.021	0.053	1
COA5	0.00462612	-0.152913	0.085	0.134	1
CTSZ	0.00464291	-0.29913	0.443	0.48	1
ARL3	0.0046788	0.14037	0.232	0.179	1
HLA-F	0.00473276	0.186361	0.528	0.463	1
ZNF467	0.00475061	-0.123466	0.062	0.107	1
AVPR2	0.00479359	-0.179451	0.196	0.259	1
ZNF267	0.0048101	-0.125731	0.054	0.097	1
CCT4	0.00481302	-0.147333	0.242	0.312	1
BTBD3	0.0048146	0.156444	0.098	0.063	1
MBNL2	0.00481963	-0.217048	0.247	0.306	1
ATP6V0C	0.00482748	0.118036	0.487	0.417	1
GET1	0.00484962	0.1146	0.108	0.07	1
COPS2	0.00485319	-0.172629	0.224	0.291	1
GNB4	0.00486306	-0.161259	0.108	0.161	1
FXYD5	0.00486381	-0.183551	0.76	0.787	1
CNST	0.00486517	-0.107734	0.077	0.125	1
BCAM	0.00488011	-0.158087	0.688	0.719	1
GAS2L1	0.00490243	0.121984	0.265	0.205	1
ATP6AP1	0.00490557	0.114286	0.237	0.179	1
NDFIP1	0.00491439	0.150303	0.32	0.262	1
COPZ1	0.00492129	0.10559	0.214	0.159	1
CCND3	0.00492441	-0.214406	0.271	0.329	1
MRPS17	0.00498809	-0.119904	0.057	0.1	1
NTMT1	0.00499877	0.128175	0.121	0.082	1
LYRM1	0.00507318	-0.123949	0.067	0.114	1
PCDH17	0.00510851	-0.115318	0.049	0.09	1
FGF2	0.00516179	0.114658	0.34	0.276	1
CCDC112	0.00516202	0.109731	0.157	0.111	1
PHPT1	0.00523209	-0.224227	0.291	0.349	1
DSP	0.00526061	-0.152989	0.191	0.251	1
HEXD	0.00542263	-0.127355	0.057	0.099	1
S1PR1	0.00542659	0.194654	0.41	0.347	1
KLF6	0.00542804	-0.139598	0.647	0.72	1
PHLDA3	0.00546661	-0.112925	0.041	0.079	1
ASAH1	0.00550818	0.140438	0.245	0.193	1
DIPK2A	0.00552005	-0.104562	0.039	0.077	1
SRSF2	0.00571485	-0.192754	0.317	0.38	1
RHEB	0.00574915	0.155648	0.304	0.248	1
PIP5K1C	0.00575176	0.114675	0.124	0.084	1
MT-ATP8	0.00577781	-0.162136	0.224	0.29	1
PRKCH	0.00580149	-0.193699	0.196	0.25	1
COPS9	0.00581153	-0.229808	0.464	0.518	1
HLA-DMB	0.0058126	-0.178439	0.144	0.2	1
PSMD8	0.00582768	0.168065	0.407	0.351	1
DGLUCY	0.0058603	0.12488	0.142	0.1	1
CRYL1	0.00587898	-0.127853	0.059	0.102	1
CEP112	0.00589139	-0.136677	0.144	0.202	1
CDC27	0.00589885	0.129007	0.25	0.194	1
TMEM91	0.00589991	-0.132473	0.049	0.088	1
OARD1	0.00591308	-0.121035	0.116	0.17	1
XRN2	0.00595428	-0.202378	0.363	0.422	1
GRN	0.00595593	-0.244637	0.497	0.545	1
UBTF	0.00596061	0.192931	0.265	0.211	1
SLC25A25	0.00598267	-0.182053	0.09	0.138	1
CLTB	0.00598711	0.188232	0.317	0.26	1
KDELR1	0.00598852	-0.116063	0.438	0.495	1
TMEM14C	0.0060595	-0.199563	0.394	0.459	1
TSSC4	0.00607284	0.182561	0.24	0.188	1
MRPL48	0.00607843	0.103058	0.085	0.053	1
POLD4	0.00610303	-0.146262	0.175	0.237	1
HIVEP1	0.00610395	-0.112928	0.111	0.164	1
SHROOM4	0.00610523	0.135858	0.255	0.203	1
IQCK	0.00612389	0.113467	0.126	0.086	1
ZNFX1	0.00615755	0.168166	0.183	0.137	1
ZC3H12A	0.00615774	-0.102422	0.018	0.048	1
COL4A1	0.00617071	-0.213341	0.188	0.247	1
CLTA	0.00620059	-0.13685	0.513	0.58	1
SRP9	0.00620485	0.211243	0.443	0.38	1
SNRPE	0.00620914	-0.177152	0.399	0.466	1
CHD1	0.00621708	-0.146462	0.173	0.234	1
KHDRBS3	0.00627685	-0.104494	0.018	0.047	1
HOXB3	0.00630962	0.102992	0.121	0.082	1
ANAPC16	0.00634576	0.195881	0.505	0.442	1
PSMA1	0.00641252	-0.139154	0.33	0.395	1
PDHB	0.00644094	0.172208	0.216	0.168	1
RTL8C	0.00644969	0.109937	0.258	0.201	1
CCDC68	0.00647562	-0.169392	0.129	0.183	1
GSN	0.00649054	-0.32325	0.936	0.9	1
ARID1B	0.00652349	-0.184765	0.211	0.27	1
PGAM1	0.00661274	0.130332	0.304	0.248	1
PIM1	0.0067237	-0.127567	0.052	0.092	1
EXOSC6	0.00677709	0.134554	0.229	0.179	1
TRIR	0.00679282	-0.208008	0.562	0.602	1
TMBIM4	0.00681296	-0.185642	0.518	0.571	1
BMERB1	0.00681807	-0.131248	0.108	0.161	1
MGST3	0.00682273	-0.169691	0.603	0.655	1
PKM	0.00685686	-0.120052	0.469	0.527	1
SERPINH1	0.00688287	-0.176958	0.183	0.241	1
TSHZ1	0.00688579	-0.15584	0.119	0.17	1
GOLPH3	0.00693928	0.128831	0.131	0.091	1
TIMM10	0.00697203	-0.151137	0.144	0.2	1
SRGAP2C	0.00697206	-0.146955	0.09	0.137	1
MTIF3	0.006977	-0.229702	0.314	0.372	1
ACYP1	0.00703433	-0.130691	0.072	0.117	1
C5orf56	0.0070368	0.106228	0.149	0.106	1
FAM177A1	0.00703895	-0.173762	0.322	0.383	1
ARMC5	0.00707964	-0.111001	0.023	0.054	1
GCC2	0.00710608	0.121922	0.361	0.294	1
UFL1	0.00715066	0.140127	0.232	0.178	1
QKI	0.00719386	0.150526	0.492	0.425	1
ENOSF1	0.00726615	0.108998	0.101	0.066	1
TLNRD1	0.00729841	0.149246	0.201	0.152	1
PRORP	0.00732518	-0.113704	0.052	0.091	1
CLEC3B	0.00735773	0.107993	0.387	0.322	1
PHB2	0.00738481	-0.199678	0.289	0.348	1
CDK11B	0.00738754	0.207117	0.224	0.177	1
IFNAR1	0.00747236	0.135923	0.312	0.254	1
TES	0.00757176	0.118154	0.327	0.271	1
AKIRIN2	0.00757627	-0.132122	0.103	0.152	1
UBE2W	0.00758927	0.159436	0.111	0.076	1
SNX5	0.00761595	-0.154867	0.106	0.154	1
BCR	0.00773254	0.163422	0.24	0.189	1
ECHS1	0.00786156	0.147872	0.309	0.253	1
CTSH	0.00788658	-0.183351	0.503	0.553	1
FMNL2	0.00804148	-0.116378	0.062	0.102	1
UBL5	0.00804566	0.175385	0.691	0.646	1
ATXN3	0.00809213	-0.192919	0.147	0.198	1
TECR	0.00818753	-0.118921	0.157	0.211	1
CDKN1C	0.00819816	-0.161606	0.206	0.266	1
MRPS33	0.00821821	-0.144038	0.106	0.154	1
UGP2	0.00830393	-0.226255	0.281	0.34	1
ATP5PO	0.00840353	-0.132194	0.412	0.483	1
MYO1D	0.00841854	0.103317	0.067	0.04	1
MMRN2	0.00842017	0.184767	0.621	0.563	1
SETX	0.00842453	-0.15324	0.191	0.249	1
GPX3	0.00851425	0.121232	0.106	0.071	1
HMGN2	0.00854375	-0.184683	0.41	0.469	1
IRF1	0.00863715	-0.2764	0.345	0.399	1
MT2A	0.00866124	-0.569961	0.838	0.845	1
UBE2R2	0.00868579	-0.163266	0.227	0.291	1
IER5	0.00871237	-0.204888	0.245	0.305	1
CHD7	0.00872386	-0.109913	0.098	0.148	1
FAF2	0.00880599	0.135343	0.165	0.122	1
KCTD20	0.00886959	-0.1138	0.075	0.118	1
NDUFA6	0.00890151	0.134722	0.312	0.253	1
NCKAP1	0.00894444	0.133945	0.335	0.282	1
OAT	0.00896033	0.106762	0.111	0.075	1
TMEM70	0.00896212	-0.150615	0.093	0.138	1
SVIP	0.00897048	-0.166025	0.16	0.215	1
DEDD	0.00897742	0.127656	0.088	0.057	1
C12orf57	0.00899789	0.174205	0.552	0.487	1
TAX1BP3	0.00900353	0.117646	0.325	0.267	1
LSM8	0.00900572	-0.203846	0.304	0.361	1
TRAPPC10	0.0090342	0.104225	0.088	0.057	1
VMP1	0.00911548	0.133606	0.299	0.247	1
OLFML2A	0.0092211	-0.105503	0.095	0.143	1
PCMT1	0.00923839	0.119699	0.317	0.254	1
SIK2	0.00935331	-0.131079	0.057	0.095	1
CD79B	0.00949857	-0.134042	0.144	0.198	1
CAPG	0.00950487	-0.108255	0.101	0.147	1
IVNS1ABP	0.0095086	-0.169132	0.059	0.098	1
TM9SF1	0.0095216	0.131978	0.165	0.122	1
NDUFA12	0.00962534	0.151786	0.464	0.405	1
USP3	0.00967412	-0.11238	0.09	0.136	1
STOX2	0.00967966	-0.10113	0.062	0.102	1
SRSF3	0.00968383	-0.142148	0.582	0.635	1
CYP1A1	0.0097959	-0.184576	0.021	0.049	1
OCIAD1	0.00980907	0.168301	0.487	0.434	1
HIBCH	0.00984572	-0.107022	0.046	0.083	1
XRRA1	0.00989622	0.158091	0.149	0.109	1
ECSCR	0.00992589	-0.145851	0.786	0.803	1
DAB2	0.00994718	-0.130769	0.271	0.33	1
EPHA4	0.00998536	0.108109	0.183	0.137	1
GALNT1	0.0100281	-0.19939	0.129	0.176	1
TOMM6	0.0100342	0.113166	0.374	0.313	1
CCL21	0.0100857	-0.134597	0.925	0.947	1
DBP	0.0101366	-0.135751	0.088	0.131	1
PPP1R13L	0.0101512	-0.118878	0.028	0.059	1
ARIH1	0.0102468	-0.10702	0.116	0.166	1
SNRK	0.0102665	-0.219933	0.247	0.301	1
FKBP1A	0.0102986	-0.207389	0.781	0.8	1
UBN1	0.0103486	-0.163281	0.219	0.274	1
CLCN3	0.0103588	-0.124259	0.116	0.165	1
DIPK1B	0.0104077	0.122284	0.353	0.296	1
TCF3	0.0105089	0.110344	0.095	0.063	1
MMP28	0.0106644	-0.165997	0.322	0.379	1
PRRC2C	0.0106686	-0.169572	0.603	0.654	1
ARPC5L	0.0107571	0.154935	0.33	0.271	1
DDIT3	0.0109598	-0.118568	0.044	0.079	1
LIAS	0.0110503	-0.118558	0.039	0.072	1
STAB1	0.0112267	-0.110833	0.095	0.142	1
METTL7A	0.011234	-0.154878	0.168	0.22	1
LAMB2	0.0112518	-0.20774	0.25	0.3	1
ROCK1	0.0112816	0.115292	0.42	0.363	1
RPGR	0.0113606	-0.200956	0.191	0.245	1
SEPTIN2	0.0114365	0.195733	0.513	0.46	1
GPCPD1	0.0115081	-0.126583	0.082	0.125	1
DCAF12	0.0115187	0.121181	0.093	0.062	1
C12orf10	0.0115626	-0.189001	0.211	0.263	1
PNKD	0.0116203	0.143036	0.361	0.302	1
COMMD3	0.011676	0.133894	0.155	0.113	1
DPM2	0.0117045	0.141258	0.16	0.119	1
PAPSS1	0.0117061	0.130344	0.111	0.076	1
CHMP4A	0.0118381	0.142827	0.291	0.237	1
MORF4L1	0.0118986	0.17229	0.74	0.691	1
ARL2BP	0.0119328	0.117598	0.356	0.298	1
ZNF622	0.0119692	-0.128877	0.082	0.124	1
RSL24D1	0.0120021	-0.201565	0.433	0.488	1
CCDC71L	0.0120104	-0.140974	0.139	0.189	1
FAM172A	0.0121024	0.111504	0.16	0.118	1
GKAP1	0.0121092	-0.110736	0.036	0.068	1
KIAA0319L	0.0121377	-0.117571	0.095	0.139	1
GTF2F1	0.0121404	-0.130856	0.196	0.252	1
APEX1	0.0122621	-0.17356	0.273	0.324	1
MNAT1	0.0123109	-0.134749	0.064	0.102	1
SAV1	0.0123161	-0.123047	0.186	0.244	1
LRPAP1	0.0123693	0.101931	0.32	0.266	1
FSCN1	0.0124349	-0.100236	0.072	0.114	1
OXA1L	0.012438	-0.192012	0.191	0.241	1
TAF10	0.0125738	0.116646	0.307	0.247	1
DNAJB4	0.0125778	0.172478	0.322	0.268	1
CCNL1	0.0126459	0.198639	0.536	0.485	1
ATP6V1F	0.0126946	0.145362	0.454	0.388	1
CAPN2	0.0127451	-0.12711	0.253	0.309	1
SERTAD4	0.0128047	0.101856	0.106	0.072	1
PPP5C	0.0128275	-0.139199	0.126	0.173	1
PTBP3	0.0129386	-0.183259	0.25	0.305	1
STRN	0.0129515	-0.102566	0.085	0.128	1
TMEM165	0.0129717	0.128058	0.245	0.198	1
MZT2B	0.0130208	-0.213618	0.58	0.62	1
[truncated: 574 more rows]

## Sheet: Artery-Capillary
Symbol	p_val	avg_log2FC	pct.1	pct.2	p_val_adj
SEMA3G	3.85796e-168	0.93714	0.502	0.05	1.41205e-163
CXCL12	9.32103e-159	2.17706	0.714	0.117	3.41159e-154
HEY1	3.27436e-139	1.02292	0.489	0.058	1.19845e-134
NEBL	6.96987e-131	0.847031	0.427	0.047	2.55104e-126
IGFBP3	7.83397e-109	2.47625	0.559	0.1	2.86731e-104
CCL14	3.31415e-105	-3.49555	0.784	0.977	1.21301e-100
ACKR1	1.66873e-99	-3.5095	0.573	0.932	6.10773e-95
ARL15	1.32053e-93	1.05363	0.59	0.126	4.83326e-89
SRP14	2.9879e-83	1.64722	1	0.972	1.0936e-78
ALPL	6.01458e-77	0.543873	0.22	0.021	2.2014e-72
BTNL9	1.42123e-76	0.596992	0.282	0.034	5.20186e-72
MSX1	2.5946e-75	0.875151	0.449	0.087	9.49648e-71
HES4	2.68582e-74	0.713533	0.432	0.079	9.83036e-70
GJA4	2.14399e-73	0.788147	0.467	0.092	7.84723e-69
SRGN	4.63745e-71	1.37661	0.797	0.328	1.69735e-66
SPECC1	9.60159e-71	0.405166	0.291	0.039	3.51428e-66
CHRM3	4.03524e-68	0.300326	0.176	0.015	1.47694e-63
C19orf33	5.95955e-65	1.04465	0.577	0.156	2.18125e-60
SLC9A3R2	1.11195e-64	1.76538	0.912	0.602	4.06984e-60
PTP4A3	6.10942e-64	0.792031	0.361	0.066	2.23611e-59
CLU	1.80165e-63	-2.281	0.952	0.979	6.59423e-59
SOX17	2.74467e-62	1.06019	0.608	0.18	1.00458e-57
ADGRF5	6.46517e-61	1.21495	0.762	0.297	2.36632e-56
EFNB2	1.14276e-58	1.12546	0.674	0.233	4.18262e-54
VWF	5.306e-58	-1.96164	0.502	0.856	1.94205e-53
TPT1	6.23603e-57	-0.919697	1	1	2.28245e-52
BST2	6.45672e-57	1.34487	0.85	0.402	2.36323e-52
ITM2B	5.31309e-56	-1.11398	0.987	0.995	1.94464e-51
RAMP3	1.50714e-55	-1.95648	0.247	0.72	5.51629e-51
SAT1	2.87912e-55	2.07229	0.916	0.715	1.05379e-50
CLIC5	8.57998e-55	0.2791	0.176	0.019	3.14036e-50
PLLP	9.38844e-55	0.546417	0.366	0.075	3.43626e-50
TMEM178A	1.94247e-54	0.37701	0.194	0.023	7.10964e-50
SOX5	2.87092e-54	0.284061	0.123	0.009	1.05079e-49
A2M	3.41522e-54	1.1803	0.974	0.736	1.25e-49
ICAM2	1.43055e-50	1.3098	0.811	0.408	5.23597e-46
TMSB4X	1.46295e-47	-0.878019	1	1	5.35454e-43
ENPP2	1.48557e-47	1.24383	0.789	0.401	5.43732e-43
CP	9.23584e-47	0.39746	0.132	0.012	3.38041e-42
S100A10	7.24185e-46	-1.07268	0.991	0.99	2.65059e-41
FAM107A	1.19186e-44	0.66271	0.489	0.144	4.36233e-40
IFI27	1.56574e-44	1.14644	0.991	0.976	5.73078e-40
RHOB	1.70521e-44	1.26948	0.793	0.405	6.24125e-40
NOTCH4	7.40766e-44	0.647549	0.405	0.108	2.71128e-39
PCSK5	1.19426e-43	0.362547	0.207	0.031	4.37112e-39
PPA1	1.36664e-43	1.03264	0.85	0.498	5.00205e-39
S100A4	9.52379e-43	1.23614	0.965	0.705	3.4858e-38
NPR3	1.33787e-42	0.371132	0.167	0.022	4.89673e-38
SLC12A2	2.12183e-42	0.538368	0.278	0.055	7.76611e-38
LGALS3BP	2.67267e-41	0.250268	0.128	0.013	9.78225e-37
PRDM16	4.80662e-41	0.254804	0.119	0.011	1.75927e-36
AQP1	2.17454e-40	-1.23874	0.833	0.939	7.95902e-36
SYT1	3.98699e-40	0.553532	0.216	0.037	1.45928e-35
PRDM16-DT	4.97496e-40	0.169978	0.101	0.008	1.82088e-35
ATP2A3	5.74809e-40	0.453611	0.282	0.059	2.10386e-35
TSC22D1	8.76426e-40	1.02591	0.828	0.459	3.20781e-35
CRYBG3	4.68333e-39	0.995282	0.722	0.348	1.71415e-34
EMP3	1.86133e-37	0.500649	0.348	0.09	6.81266e-33
MGP	4.788e-37	-1.85767	0.806	0.914	1.75246e-32
TOX2	2.53327e-36	0.399861	0.238	0.047	9.27203e-32
MAP1B	3.32795e-36	0.325288	0.185	0.03	1.21806e-31
JAG2	3.69345e-36	0.612965	0.463	0.151	1.35184e-31
NR4A1	7.60996e-36	0.845017	0.467	0.163	2.78532e-31
NTRK2	9.10627e-36	0.21241	0.053	0.002	3.33299e-31
AIF1L	2.01617e-35	0.482212	0.278	0.064	7.37937e-31
ADIRF	3.95022e-35	-0.996138	0.987	0.992	1.44582e-30
AC004889.1	8.98519e-35	0.376821	0.229	0.046	3.28867e-30
JAG1	1.57883e-34	0.603058	0.493	0.173	5.77866e-30
FBLN5	2.40576e-34	0.280995	0.181	0.03	8.80533e-30
TBX3	4.56528e-34	0.238312	0.128	0.016	1.67094e-29
PTMA	7.26921e-34	0.576365	1	0.999	2.6606e-29
KYNU	2.65612e-33	0.109214	0.066	0.004	9.72167e-29
TSPAN13	1.18779e-32	0.573388	0.432	0.144	4.34744e-28
HRK	1.37382e-32	0.139319	0.044	0.002	5.02831e-28
CLDN5	9.09086e-32	1.10871	0.952	0.864	3.32735e-27
NR2F2	1.28083e-30	-1.37269	0.229	0.591	4.68796e-26
GLUL	2.34101e-30	0.963876	0.811	0.537	8.56833e-26
PODXL	7.55797e-30	0.80717	0.714	0.384	2.76629e-25
LPCAT2	8.35646e-30	0.695938	0.502	0.198	3.05855e-25
PLVAP	1.23021e-29	-1.19144	0.48	0.749	4.5027e-25
KRT19	2.85508e-29	0.216666	0.141	0.022	1.04499e-24
IL32	4.5728e-29	0.777746	0.476	0.182	1.67369e-24
RCAN2	1.08473e-28	0.326987	0.207	0.044	3.97021e-24
MT-ND2	2.4592e-28	-0.941244	0.996	0.994	9.0009e-24
ACE	2.58345e-28	0.661217	0.577	0.257	9.45568e-24
SLC16A14	4.18082e-28	0.253804	0.194	0.04	1.53022e-23
AC004540.2	7.44892e-28	0.482826	0.366	0.118	2.72638e-23
IFI6	1.11964e-27	0.991962	0.718	0.392	4.09799e-23
PECAM1	1.17201e-27	-0.873947	0.837	0.935	4.28969e-23
ADAMTS6	1.39878e-27	0.41319	0.269	0.071	5.11967e-23
PRCP	1.61119e-27	-1.17322	0.256	0.578	5.89712e-23
CAV1	2.32448e-27	0.785385	1	0.964	8.50781e-23
PERP	4.06469e-27	-1.26273	0.123	0.474	1.48772e-22
HBEGF	5.73194e-27	0.505863	0.361	0.12	2.09795e-22
RPL34	6.48568e-27	-0.54861	1	1	2.37383e-22
PDCD4	7.14021e-27	0.852072	0.775	0.477	2.61339e-22
STC1	8.82322e-27	0.92917	0.339	0.112	3.22939e-22
UNC5B	1.24732e-26	0.189041	0.088	0.01	4.56531e-22
PPP1R14A	1.54496e-26	0.32653	0.115	0.016	5.65471e-22
FAM89A	1.58134e-26	0.412864	0.242	0.062	5.78786e-22
IGFBP7	2.22938e-26	-0.665299	0.921	0.973	8.15976e-22
DUSP1	4.4729e-26	0.987952	0.934	0.853	1.63712e-21
ASS1	2.5559e-25	0.511837	0.414	0.154	9.35485e-21
KCNJ2-AS1	3.62919e-25	0.172619	0.097	0.013	1.32832e-20
FILIP1	5.62311e-25	0.429856	0.322	0.1	2.05811e-20
SLC14A1	7.91412e-25	0.161194	0.115	0.017	2.89665e-20
ISG15	2.73861e-24	1.04401	0.656	0.367	1.00236e-19
RPS2	4.5578e-24	-0.629056	1	0.999	1.6682e-19
TMEM47	4.66808e-24	0.262964	0.185	0.042	1.70856e-19
SOS1	5.94333e-24	0.452142	0.357	0.125	2.17532e-19
SIPA1L2	8.96445e-24	0.201691	0.132	0.023	3.28108e-19
IL1R1	9.18384e-24	-1.05904	0.141	0.46	3.36138e-19
SSTR1	1.04454e-23	0.108509	0.066	0.006	3.82312e-19
ADRA2C	1.09392e-23	0.249682	0.141	0.026	4.00386e-19
PFN2	2.25734e-23	0.145374	0.093	0.012	8.26208e-19
CPM	2.4013e-23	0.179814	0.097	0.014	8.789e-19
HLA-C	3.68981e-23	0.554962	1	0.979	1.35051e-18
PIM3	4.58607e-23	-1.00844	0.361	0.643	1.67855e-18
ENG	5.37138e-23	-1.00116	0.652	0.801	1.96598e-18
NPNT	7.57696e-23	0.114797	0.101	0.015	2.77324e-18
RPL37	7.82719e-23	-0.537185	1	0.999	2.86483e-18
MAP4K3-DT	1.20113e-22	0.393044	0.286	0.091	4.39627e-18
AC004947.1	1.5207e-22	0.139064	0.088	0.012	5.5659e-18
RUNDC3B	1.57127e-22	0.608401	0.396	0.152	5.75101e-18
THSD7A	2.01488e-22	0.605461	0.542	0.249	7.37465e-18
MAST4	3.27929e-22	0.465097	0.374	0.14	1.20025e-17
ITGA8	5.42708e-22	0.186109	0.079	0.01	1.98637e-17
SORBS2	6.24135e-22	0.415626	0.374	0.14	2.28439e-17
NOSTRIN	9.79204e-22	-1.07136	0.22	0.499	3.58398e-17
SNCG	1.20786e-21	-0.96394	0.348	0.623	4.42089e-17
STMN1	1.35089e-21	0.650555	0.467	0.209	4.9444e-17
GPIHBP1	1.37232e-21	0.427659	0.286	0.092	5.02283e-17
IFI27L2	1.69505e-21	0.38695	0.388	0.148	6.20406e-17
MT-CYB	1.84134e-21	-0.775769	0.996	0.996	6.73948e-17
LEPR	2.10047e-21	0.494571	0.458	0.201	7.68794e-17
TFPI	2.91314e-21	-0.937718	0.37	0.647	1.06624e-16
ABCB1	3.05122e-21	0.631908	0.533	0.258	1.11678e-16
UTRN	3.43935e-21	0.655258	0.736	0.459	1.25884e-16
HSPA2	4.11886e-21	0.521387	0.471	0.206	1.50754e-16
TGFBR3	4.53214e-21	-0.954659	0.238	0.53	1.65881e-16
JUND	5.34567e-21	0.786036	0.952	0.892	1.95657e-16
PREX1	5.58041e-21	0.274143	0.167	0.039	2.04248e-16
DAAM1	5.65242e-21	-1.07925	0.326	0.587	2.06884e-16
RPS23	5.94987e-21	-0.506647	1	0.999	2.17771e-16
IGFBP4	6.13995e-21	-0.878409	0.802	0.886	2.24728e-16
CGNL1	1.0471e-20	0.195475	0.106	0.018	3.83249e-16
RAMP2	1.09854e-20	0.621751	0.96	0.882	4.02075e-16
RGS3	1.43161e-20	0.387111	0.317	0.112	5.23983e-16
SPRY1	1.8837e-20	0.64348	0.639	0.348	6.89451e-16
TPM1	3.4733e-20	0.492658	0.463	0.201	1.27126e-15
RPL32	6.77219e-20	-0.504822	1	0.999	2.47869e-15
FGF12	9.25945e-20	0.102665	0.066	0.008	3.38905e-15
RPL36A	1.3916e-19	-0.585327	0.996	0.994	5.09338e-15
APOLD1	1.92879e-19	0.488634	0.405	0.17	7.05955e-15
RPS18	2.16916e-19	-0.499884	1	1	7.93936e-15
SEZ6L2	3.4678e-19	0.112017	0.062	0.007	1.26925e-14
MMRN1	4.15285e-19	-1.11177	0.388	0.61	1.51999e-14
COL21A1	5.43968e-19	0.329489	0.189	0.052	1.99098e-14
HSPG2	6.71171e-19	-0.922852	0.48	0.687	2.45655e-14
RDX	9.75906e-19	0.839217	0.793	0.58	3.57191e-14
CCN3	1.00343e-18	0.158746	0.093	0.015	3.67265e-14
KCNN3	1.22754e-18	0.322627	0.33	0.123	4.49291e-14
CST3	1.63409e-18	-0.638413	0.974	0.986	5.98092e-14
COL15A1	2.71773e-18	-1.01739	0.163	0.436	9.94715e-14
LDLR	2.76209e-18	0.313398	0.308	0.113	1.01095e-13
HECW2	2.7775e-18	0.190001	0.11	0.021	1.01659e-13
DUSP23	3.00265e-18	-0.925378	0.26	0.535	1.099e-13
ACTG1	3.55472e-18	-0.68511	0.978	0.974	1.30106e-13
LIFR	4.07208e-18	-1.03707	0.419	0.626	1.49042e-13
PIK3R3	5.53505e-18	0.565248	0.502	0.251	2.02588e-13
N4BP3	5.7282e-18	0.162341	0.093	0.016	2.09658e-13
PALMD	7.84063e-18	0.66505	0.872	0.724	2.86975e-13
PLPP1	1.0551e-17	0.40794	0.463	0.215	3.86176e-13
NCOA7	1.44229e-17	-0.969446	0.286	0.524	5.27893e-13
CXCL2	1.71186e-17	1.25686	0.251	0.087	6.26559e-13
SGK1	2.50738e-17	0.481545	0.295	0.113	9.17725e-13
NUDT14	2.73913e-17	0.483478	0.423	0.191	1.00255e-12
INAFM2	3.13589e-17	0.148266	0.11	0.022	1.14777e-12
OCIAD2	3.22325e-17	0.538478	0.564	0.304	1.17974e-12
C16orf74	3.60377e-17	0.108006	0.07	0.01	1.31902e-12
VEGFC	3.90162e-17	0.37686	0.357	0.145	1.42803e-12
PRKX	4.67434e-17	0.196431	0.154	0.039	1.71085e-12
CCN1	5.35354e-17	1.03658	0.524	0.288	1.95945e-12
MT-CO1	5.50726e-17	-0.69581	0.991	0.994	2.01571e-12
GUCY1B1	7.7571e-17	0.178949	0.115	0.024	2.83918e-12
MT-CO3	8.64442e-17	-0.725776	0.982	0.993	3.16394e-12
RPL26	9.55039e-17	-0.457522	1	0.999	3.49554e-12
FAM124B	9.77339e-17	0.178253	0.106	0.021	3.57716e-12
CD9	1.18914e-16	0.581403	0.938	0.829	4.35236e-12
CDH24	1.27645e-16	0.211666	0.128	0.029	4.67195e-12
MT-ND1	1.49007e-16	-0.734381	0.982	0.987	5.45382e-12
H19	1.50841e-16	0.23378	0.097	0.018	5.52094e-12
RPL7	1.76872e-16	-0.52953	0.991	0.98	6.47369e-12
SELP	2.0259e-16	-0.760032	0.062	0.32	7.41501e-12
FOSB	2.62313e-16	0.873837	0.692	0.474	9.6009e-12
CAVIN3	4.12901e-16	0.457824	0.722	0.465	1.51126e-11
AFAP1L2	4.8894e-16	0.305595	0.225	0.075	1.78957e-11
ITM2A	6.52896e-16	-0.930554	0.502	0.679	2.38966e-11
WNT4	7.06775e-16	0.164951	0.11	0.024	2.58687e-11
RPS14	7.72519e-16	-0.444076	1	1	2.8275e-11
MARCKS	1.07839e-15	-0.868155	0.172	0.422	3.94703e-11
PLCD3	1.48285e-15	0.176544	0.145	0.038	5.4274e-11
LAP3	1.78501e-15	0.513482	0.63	0.381	6.5333e-11
CFAP36	1.91299e-15	0.410993	0.511	0.262	7.00175e-11
TC2N	1.94208e-15	0.111571	0.119	0.027	7.10821e-11
CRIP2	2.1567e-15	0.505978	0.93	0.791	7.89374e-11
LTBP4	2.24086e-15	0.405934	0.423	0.2	8.20176e-11
PPT2	2.38896e-15	0.242926	0.128	0.031	8.74384e-11
GMFG	2.41185e-15	-0.783389	0.154	0.396	8.82762e-11
USP54	3.25223e-15	0.139253	0.088	0.017	1.19035e-10
DST	3.25789e-15	0.522913	0.348	0.155	1.19242e-10
AMD1	3.69538e-15	0.522769	0.507	0.27	1.35255e-10
DLL4	4.34051e-15	0.283495	0.295	0.117	1.58867e-10
NPC2	4.58199e-15	-0.796228	0.551	0.697	1.67705e-10
DHRS3	5.93439e-15	0.24162	0.238	0.084	2.17205e-10
PTPRG	6.37855e-15	0.221495	0.211	0.071	2.33461e-10
LDHA	6.6381e-15	-0.705046	0.74	0.811	2.42961e-10
TEAD4	7.37174e-15	0.164428	0.15	0.041	2.69813e-10
FAM110D	1.03903e-14	-0.815463	0.317	0.536	3.80295e-10
EVL	1.09217e-14	0.453962	0.392	0.187	3.99745e-10
PRSS23	1.44364e-14	-0.895704	0.185	0.413	5.28386e-10
TSPAN2	1.49916e-14	0.44777	0.48	0.246	5.48706e-10
ZFP36	1.50254e-14	0.694773	0.85	0.724	5.49943e-10
FUT8	1.66938e-14	0.229624	0.159	0.046	6.11009e-10
SORT1	1.77418e-14	0.240098	0.159	0.046	6.49368e-10
ACTN4	1.82685e-14	0.5503	0.824	0.62	6.68644e-10
DIXDC1	1.96271e-14	-0.67643	0.057	0.287	7.1837e-10
PROSER2	2.19578e-14	0.15662	0.084	0.016	8.03676e-10
SERPINB6	2.36639e-14	0.432935	0.656	0.407	8.66124e-10
SPHK1	2.47605e-14	-0.74078	0.216	0.446	9.0626e-10
HLA-A	2.85676e-14	0.453925	1	0.985	1.0456e-09
INKA2	3.2033e-14	0.162516	0.066	0.01	1.17244e-09
OLFM1	3.6009e-14	-0.768231	0.119	0.344	1.31797e-09
TM4SF1	3.82135e-14	0.480418	0.974	0.892	1.39865e-09
RPS6	4.90618e-14	-0.45622	1	0.998	1.79571e-09
DEPP1	4.93502e-14	0.61841	0.639	0.413	1.80627e-09
SH3BP5	6.9745e-14	-0.832599	0.436	0.594	2.55273e-09
ATF3	7.03253e-14	0.429609	0.568	0.318	2.57398e-09
CDK19	1.05291e-13	0.229672	0.198	0.067	3.85377e-09
GNAS	1.34108e-13	0.455254	0.934	0.869	4.90848e-09
ACTN1	1.58325e-13	-0.766736	0.335	0.531	5.79487e-09
ZNF503	1.61851e-13	0.195875	0.159	0.048	5.9239e-09
MMP2	1.68905e-13	0.196221	0.159	0.048	6.18208e-09
RPL10	1.78077e-13	-0.388825	1	1	6.51781e-09
STXBP6	1.97082e-13	0.194375	0.159	0.048	7.21338e-09
RPS15A	2.14715e-13	-0.419261	1	0.998	7.85879e-09
GAPDH	2.21341e-13	-0.558615	0.965	0.975	8.1013e-09
COTL1	2.47233e-13	-0.63325	0.057	0.265	9.04897e-09
LINC00639	2.6812e-13	0.152419	0.07	0.013	9.81345e-09
PMVK	3.65287e-13	0.340353	0.295	0.128	1.33699e-08
GAS5	3.69602e-13	-0.627182	0.784	0.833	1.35278e-08
CCDC88C	4.84774e-13	0.170849	0.203	0.071	1.77432e-08
AGPAT1	5.98075e-13	0.259089	0.211	0.077	2.18902e-08
IER5L	6.10592e-13	0.344944	0.357	0.168	2.23483e-08
MT-ATP6	7.12548e-13	-0.669679	0.991	0.995	2.608e-08
MT-CO2	7.3733e-13	-0.590323	0.996	0.995	2.6987e-08
IFIT3	7.4115e-13	0.552834	0.436	0.232	2.71268e-08
TPD52L1	9.74257e-13	-0.63218	0.079	0.287	3.56588e-08
TIMP1	1.16873e-12	-0.703273	0.621	0.738	4.27765e-08
CA5B	1.25776e-12	0.219134	0.295	0.125	4.60351e-08
PTMS	1.30759e-12	-0.537062	0.93	0.923	4.78592e-08
DBNDD2	1.37736e-12	0.273511	0.26	0.107	5.04127e-08
TGFBR2	1.41166e-12	-0.676847	0.78	0.816	5.16682e-08
BTG2	1.47808e-12	0.800399	0.67	0.47	5.40993e-08
RRAS	1.64268e-12	0.418339	0.476	0.263	6.01236e-08
IER2	1.69165e-12	0.747286	0.947	0.908	6.19162e-08
CLEC14A	1.74336e-12	0.462777	0.912	0.818	6.38088e-08
RPL11	1.89336e-12	-0.376327	1	0.999	6.9299e-08
CCL23	1.89914e-12	-0.790491	0.044	0.251	6.95104e-08
SLFN12L	1.90846e-12	0.115057	0.04	0.005	6.98514e-08
MRPL33	1.90958e-12	0.503009	0.683	0.471	6.98927e-08
ADGRG1	1.95382e-12	0.325004	0.344	0.161	7.15118e-08
RPL12	2.36729e-12	-0.433663	1	0.998	8.66451e-08
CPVL	2.59781e-12	-0.625336	0.097	0.307	9.50824e-08
CYBA	2.6022e-12	0.289251	0.229	0.09	9.5243e-08
MYL9	2.70013e-12	0.607478	0.48	0.26	9.88273e-08
PLS3	2.89208e-12	0.422084	0.573	0.359	1.05853e-07
PRXL2A	3.89063e-12	-0.753741	0.352	0.522	1.42401e-07
CTHRC1	4.13283e-12	-0.649983	0.106	0.314	1.51266e-07
EPAS1	4.19111e-12	0.402847	0.837	0.635	1.53399e-07
RSAD2	4.35758e-12	0.224344	0.198	0.072	1.59492e-07
RNF144B	4.64818e-12	0.271846	0.203	0.076	1.70128e-07
B2M	5.53002e-12	0.243598	1	1	2.02404e-07
CD74	5.87792e-12	-0.551294	0.987	0.992	2.15138e-07
PDE2A	6.40905e-12	-0.620043	0.115	0.32	2.34577e-07
CTTNBP2NL	6.89508e-12	0.476776	0.445	0.249	2.52367e-07
CDH5	7.24241e-12	0.400411	0.652	0.43	2.65079e-07
EGR1	8.16121e-12	0.849292	0.626	0.422	2.98709e-07
SNHG5	8.38638e-12	-0.533584	0.749	0.8	3.0695e-07
NR4A2	8.78176e-12	0.234377	0.216	0.084	3.21421e-07
FOS	9.34425e-12	0.614487	0.969	0.932	3.42009e-07
MX2	9.41869e-12	0.270485	0.22	0.087	3.44734e-07
CMPK2	9.44465e-12	0.127733	0.11	0.029	3.45684e-07
RPS6KA5	1.19596e-11	0.273703	0.256	0.108	4.37734e-07
EGR3	1.19915e-11	0.234209	0.167	0.058	4.38901e-07
PDIA5	1.21943e-11	-0.58321	0.11	0.314	4.46324e-07
CD200	1.22575e-11	0.159832	0.084	0.019	4.48638e-07
LGALS1	1.24203e-11	0.709669	0.639	0.414	4.54597e-07
SCGB3A1	1.30477e-11	0.139726	0.044	0.006	4.77559e-07
HSPB1	1.43432e-11	-0.525695	0.894	0.926	5.24975e-07
IGF2	1.45531e-11	0.160363	0.123	0.036	5.3266e-07
TSC22D3	1.56276e-11	-0.796388	0.454	0.597	5.71985e-07
NACA	1.72841e-11	-0.451658	0.982	0.993	6.32616e-07
CD63	1.95144e-11	-0.506908	0.925	0.931	7.14247e-07
SYNJ2	2.13551e-11	0.20889	0.207	0.08	7.81618e-07
CD34	2.4787e-11	-0.587043	0.833	0.875	9.0723e-07
EGFL8	3.32943e-11	0.159643	0.132	0.041	1.2186e-06
EPB41L3	3.51442e-11	-0.514543	0.026	0.202	1.28631e-06
PRKY	3.86213e-11	0.168287	0.119	0.034	1.41358e-06
CD59	4.08499e-11	-0.507353	0.859	0.892	1.49515e-06
POMP	4.20022e-11	0.459846	0.687	0.484	1.53732e-06
ARL4A	4.61668e-11	-0.73838	0.489	0.621	1.68975e-06
SEC11C	5.27756e-11	0.333824	0.476	0.271	1.93164e-06
ADH5	6.14556e-11	0.246517	0.361	0.179	2.24934e-06
BLOC1S5	6.55784e-11	0.263605	0.304	0.143	2.40023e-06
APLNR	6.70063e-11	-0.527126	0.022	0.192	2.4525e-06
CFAP410	7.29426e-11	0.241958	0.128	0.04	2.66977e-06
JUN	7.62415e-11	0.7963	0.965	0.922	2.79052e-06
SPARC	8.28572e-11	-0.582768	0.665	0.767	3.03266e-06
AC099343.3	8.28907e-11	0.145734	0.123	0.037	3.03388e-06
TCIM	9.43844e-11	0.377142	0.198	0.078	3.45456e-06
TMSB10	1.04748e-10	0.27922	1	0.999	3.83388e-06
TUSC3	1.09449e-10	0.187124	0.203	0.079	4.00593e-06
CDA	1.12349e-10	0.260915	0.128	0.04	4.11209e-06
NEDD9	1.25348e-10	0.358163	0.471	0.275	4.58785e-06
LMO2	1.36068e-10	-0.611894	0.546	0.679	4.98023e-06
TNK2	1.56113e-10	0.149108	0.093	0.024	5.7139e-06
CD2BP2	1.66499e-10	0.254592	0.308	0.147	6.09403e-06
CCDC91	1.94128e-10	0.164186	0.15	0.051	7.10527e-06
MX1	2.09026e-10	0.477265	0.445	0.256	7.65057e-06
GADD45A	2.20746e-10	0.501016	0.507	0.311	8.07952e-06
EFNA1	2.23179e-10	0.438361	0.634	0.415	8.16858e-06
SELE	2.24008e-10	-1.22743	0.084	0.265	8.19893e-06
RPS4X	2.26263e-10	-0.37155	1	0.996	8.28146e-06
NRP1	2.35705e-10	-0.689098	0.308	0.484	8.62704e-06
MCC	2.54825e-10	0.141863	0.145	0.049	9.32683e-06
RPL13	3.34375e-10	-0.31261	1	1	1.22385e-05
HERPUD1	3.63435e-10	0.363936	0.52	0.311	1.33021e-05
TRIM2	3.97484e-10	0.164431	0.141	0.048	1.45483e-05
H3F3B	4.65462e-10	0.328618	0.969	0.968	1.70364e-05
MYO10	4.95787e-10	0.261867	0.189	0.076	1.81463e-05
IFITM3	5.16463e-10	0.329129	1	0.994	1.89031e-05
CSPP1	5.42831e-10	0.237305	0.211	0.089	1.98682e-05
COBLL1	5.98835e-10	0.231504	0.432	0.235	2.1918e-05
AC023157.3	6.22239e-10	0.170842	0.154	0.055	2.27746e-05
AL591623.1	6.71669e-10	0.166234	0.066	0.014	2.45838e-05
SELENOM	6.93801e-10	0.365474	0.749	0.555	2.53938e-05
TRIP6	7.03006e-10	0.132381	0.176	0.067	2.57307e-05
ARHGAP4	7.11357e-10	0.152566	0.097	0.027	2.60364e-05
HLA-B	7.4592e-10	0.302671	1	0.993	2.73014e-05
OR2A1-AS1	7.55699e-10	0.102812	0.066	0.014	2.76593e-05
RCAN1	8.17499e-10	0.247678	0.308	0.151	2.99213e-05
PDE10A	8.70477e-10	0.117595	0.097	0.027	3.18603e-05
SPARCL1	9.2314e-10	-0.435183	1	0.998	3.37878e-05
CDC42BPA	9.39104e-10	0.279587	0.357	0.186	3.43721e-05
CX3CL1	9.67725e-10	0.140852	0.163	0.061	3.54197e-05
IFNAR2	1.0732e-09	0.256758	0.313	0.158	3.92803e-05
RPL38	1.10526e-09	-0.358521	0.982	0.989	4.04535e-05
MAP4K3	1.18653e-09	0.17827	0.141	0.049	4.34282e-05
CENPF	1.1946e-09	0.149269	0.075	0.018	4.37234e-05
LFNG	1.20289e-09	-0.550357	0.093	0.265	4.40268e-05
SYNPO	1.20627e-09	0.237448	0.357	0.182	4.41506e-05
MECOM	1.22781e-09	0.409624	0.621	0.441	4.49391e-05
PEPD	1.22954e-09	0.217317	0.357	0.185	4.50025e-05
AKR1C2	1.31391e-09	-0.791554	0.053	0.214	4.80905e-05
TSPAN12	1.35025e-09	-0.502707	0.057	0.217	4.94204e-05
CTSH	1.3663e-09	0.422427	0.736	0.546	5.00079e-05
CTSC	1.45936e-09	-0.886813	0.348	0.485	5.34142e-05
UACA	1.50272e-09	0.449515	0.718	0.516	5.50011e-05
HIP1R	1.7707e-09	0.172476	0.225	0.097	6.48093e-05
SSUH2	1.77671e-09	0.100429	0.04	0.006	6.50294e-05
UBE2J1	1.90653e-09	0.350417	0.339	0.181	6.97811e-05
MYLK	1.98237e-09	-0.570691	0.176	0.348	7.25569e-05
HAGLROS	2.04618e-09	0.157553	0.07	0.017	7.48922e-05
MCTP1	2.08806e-09	0.350147	0.696	0.479	7.64251e-05
C3orf14	2.12115e-09	0.155672	0.106	0.032	7.76362e-05
KIF26A	2.15532e-09	0.22765	0.216	0.094	7.88869e-05
TIMP3	2.31226e-09	0.518076	0.903	0.817	8.4631e-05
RFC3	2.31259e-09	0.129118	0.154	0.057	8.4643e-05
PTPN12	2.53905e-09	0.342923	0.617	0.412	9.29318e-05
CRIM1	2.70502e-09	-0.583587	0.41	0.543	9.90065e-05
C8orf33	2.91438e-09	0.26693	0.441	0.251	0.000106669
GCNT2	2.98627e-09	0.196397	0.132	0.046	0.0001093
SCN1B	2.98824e-09	-0.481062	0.093	0.26	0.000109372
NPTN	3.21479e-09	0.329946	0.225	0.102	0.000117665
AKR1C1	3.53018e-09	-0.868807	0.242	0.408	0.000129208
RASD1	3.60743e-09	0.115172	0.097	0.028	0.000132036
TSPAN7	3.79741e-09	-0.590978	0.546	0.66	0.000138989
SH3BGRL2	4.12353e-09	-0.459076	0.075	0.242	0.000150925
RPL39	4.68474e-09	-0.337348	1	0.997	0.000171466
NSUN6	5.01766e-09	0.268001	0.339	0.179	0.000183651
NES	5.6096e-09	0.223116	0.211	0.093	0.000205317
FHL1	5.86027e-09	0.212882	0.256	0.121	0.000214492
HLA-DQA2	6.07045e-09	-0.460178	0.04	0.19	0.000222184
RAI2	6.28981e-09	0.147703	0.137	0.049	0.000230213
SERTAD4	6.42358e-09	0.16031	0.176	0.071	0.000235109
SNX3	6.71525e-09	0.4317	0.665	0.485	0.000245785
PCDH19	7.27817e-09	-0.462605	0.044	0.195	0.000266388
PLCB1	7.51337e-09	0.262183	0.322	0.169	0.000274997
RPS27A	8.2606e-09	-0.314365	1	0.999	0.000302346
RPS21	8.90967e-09	-0.342542	0.996	0.997	0.000326103
KLF2	8.91424e-09	0.345039	0.982	0.923	0.00032627
ANXA2	9.13814e-09	-0.447421	0.868	0.901	0.000334465
RPS15	9.34345e-09	-0.323876	1	0.997	0.000341979
AGA	9.92801e-09	0.114621	0.128	0.045	0.000363375
CLDN15	1.02115e-08	0.235388	0.256	0.123	0.00037375
NTHL1	1.07287e-08	0.241008	0.379	0.211	0.000392679
MSI2	1.17256e-08	0.169024	0.216	0.096	0.00042917
EEF1G	1.28827e-08	-0.409181	0.93	0.943	0.000471518
VPS37B	1.29654e-08	0.218468	0.225	0.104	0.000474545
LSR	1.34448e-08	0.224581	0.419	0.238	0.000492094
ADRB2	1.3876e-08	0.160211	0.273	0.133	0.000507876
RPL7A	1.46333e-08	-0.32396	0.996	0.995	0.000535595
GIT2	1.52242e-08	0.185588	0.229	0.105	0.000557221
GFOD1	1.58911e-08	0.197726	0.322	0.168	0.000581629
ITPRID2	1.68547e-08	0.386285	0.604	0.413	0.000616899
THSD4	1.86988e-08	0.118523	0.07	0.018	0.000684395
SNTB2	1.95053e-08	-0.539649	0.172	0.332	0.000713915
LEPROTL1	1.9779e-08	0.220058	0.264	0.131	0.000723933
PLEKHF2	2.04222e-08	0.225645	0.185	0.079	0.000747471
LAPTM5	2.07685e-08	0.19874	0.242	0.115	0.00076015
KRT10	2.08035e-08	0.269267	0.498	0.298	0.00076143
IFITM1	2.09289e-08	0.296783	0.537	0.344	0.000766019
LRP6	2.09767e-08	0.181055	0.194	0.085	0.000767767
MEOX1	2.27531e-08	-0.565392	0.194	0.363	0.000832787
KCTD15	2.33317e-08	0.149657	0.106	0.035	0.000853962
CYTL1	2.41758e-08	-0.606406	0.079	0.229	0.000884857
PRPS1	2.43151e-08	0.16091	0.207	0.092	0.000889958
GCNT1	2.49286e-08	0.179248	0.15	0.059	0.000912412
PLA2G4A	2.58957e-08	0.123442	0.11	0.037	0.00094781
RPS20	2.60434e-08	-0.357426	0.991	0.981	0.000953215
SLC1A5	2.62971e-08	-0.483901	0.093	0.245	0.0009625
GUK1	2.63716e-08	-0.484502	0.855	0.856	0.000965227
RPL30	2.69183e-08	-0.316497	1	0.999	0.000985235
NTMT1	2.82885e-08	0.111101	0.189	0.081	0.00103539
RPS24	2.99595e-08	-0.310824	1	0.999	0.00109655
TESC	3.04843e-08	-0.408817	0.053	0.2	0.00111576
GNG12	3.24359e-08	-0.496735	0.185	0.346	0.00118719
S100A13	3.28747e-08	-0.530473	0.767	0.795	0.00120325
ZFP36L2	3.32998e-08	-0.573283	0.771	0.825	0.00121881
HLA-DRA	3.64054e-08	-0.602255	0.877	0.905	0.00133247
DEPTOR	3.78054e-08	0.115904	0.084	0.024	0.00138372
PCMTD1	3.89529e-08	0.291336	0.546	0.36	0.00142571
SHROOM1	4.00991e-08	0.149644	0.119	0.042	0.00146767
LRRC1	4.25437e-08	-0.440207	0.062	0.207	0.00155714
RPS12	4.41696e-08	-0.265665	1	1	0.00161665
NRP2	4.99759e-08	-0.480599	0.079	0.224	0.00182917
RAB34	5.19698e-08	0.171011	0.229	0.108	0.00190215
MAP3K20	5.32298e-08	0.187101	0.233	0.112	0.00194826
MT-ND3	5.36342e-08	-0.397642	0.991	0.993	0.00196307
MLPH	5.41983e-08	-0.361492	0.013	0.136	0.00198371
CEBPD	5.43663e-08	-0.666415	0.454	0.569	0.00198986
RPL31	5.50276e-08	-0.374408	0.943	0.956	0.00201406
SNCA	5.60144e-08	-0.436142	0.048	0.185	0.00205018
NAA38	5.77002e-08	0.390661	0.718	0.544	0.00211189
VWA1	5.82513e-08	-0.644338	0.229	0.371	0.00213205
PLCG2	5.86911e-08	0.142099	0.198	0.089	0.00214815
RPL15	6.34376e-08	-0.325327	0.987	0.988	0.00232188
TLE5	6.39571e-08	0.314028	0.568	0.382	0.00234089
CPNE2	6.45711e-08	0.235941	0.256	0.128	0.00236337
CALM1	6.5333e-08	0.342526	0.956	0.944	0.00239125
IFNGR1	6.7577e-08	0.236218	0.427	0.251	0.00247338
SMS	6.76065e-08	0.205664	0.22	0.105	0.00247446
CD81	6.86476e-08	0.303317	0.925	0.835	0.00251257
PRMT1	7.57267e-08	0.290055	0.705	0.523	0.00277167
SCD5	7.59028e-08	0.157405	0.079	0.023	0.00277812
SEC61B	7.63268e-08	0.352512	0.705	0.555	0.00279364
HES5	7.84662e-08	0.10732	0.097	0.031	0.00287194
CTNNB1	8.55488e-08	0.233106	0.485	0.299	0.00313117
FDFT1	8.93204e-08	0.17484	0.211	0.099	0.00326922
ZNF664	8.95359e-08	0.150454	0.154	0.064	0.0032771
TMC7	8.96055e-08	0.103848	0.057	0.014	0.00327965
NET1	9.11825e-08	-0.589485	0.233	0.378	0.00333737
AOPEP	9.20667e-08	0.181103	0.449	0.268	0.00336973
ITGB4	9.26162e-08	-0.575735	0.529	0.625	0.00338984
WWP1	9.91753e-08	-0.566212	0.238	0.382	0.00362992
SEMA6A	1.05731e-07	-0.421521	0.079	0.222	0.00386986
CXCL3	1.06185e-07	0.191137	0.093	0.03	0.00388649
ATP13A3	1.12948e-07	0.18262	0.128	0.049	0.00413401
PRXL2C	1.21051e-07	0.230874	0.352	0.201	0.0044306
RPL24	1.21632e-07	-0.335005	1	0.991	0.00445186
TUBA4A	1.22175e-07	0.263415	0.295	0.158	0.00447174
PRDM1	1.26314e-07	0.170612	0.106	0.037	0.00462321
PLEKHG5	1.27097e-07	0.121871	0.053	0.012	0.00465188
RHOC	1.3151e-07	0.378991	0.709	0.588	0.00481341
ITSN2	1.33356e-07	0.173877	0.26	0.133	0.00488097
CRIP1	1.38033e-07	0.58669	0.85	0.722	0.00505213
LINC02289	1.40485e-07	0.118752	0.04	0.007	0.00514188
SLC26A2	1.76897e-07	0.19232	0.167	0.073	0.00647462
BACE2	1.82049e-07	-0.529164	0.326	0.457	0.00666317
SCARB1	1.8443e-07	-0.540808	0.167	0.311	0.00675034
CNN3	1.89097e-07	-0.534372	0.326	0.457	0.00692113
PDGFD	1.906e-07	0.102017	0.123	0.046	0.00697617
RPL17	2.09364e-07	-0.32058	1	0.993	0.00766293
ERC1	2.12739e-07	0.229904	0.256	0.134	0.00778647
ABL2	2.12759e-07	0.16576	0.203	0.095	0.00778719
HSD17B12	2.29754e-07	0.316934	0.507	0.344	0.00840924
LINC00987	2.34591e-07	0.136485	0.106	0.038	0.00858626
PNP	2.3922e-07	0.261597	0.352	0.202	0.00875568
TM6SF1	2.41496e-07	0.158337	0.172	0.076	0.00883898
LIMS1	2.50655e-07	-0.548645	0.551	0.631	0.00917422
TMEM100	2.60648e-07	0.162095	0.084	0.027	0.00953996
RB1	2.82288e-07	0.170619	0.335	0.185	0.010332
FKBP1A	2.82772e-07	-0.426435	0.744	0.801	0.0103498
CEP68	2.98768e-07	0.290237	0.458	0.289	0.0109352
S100A6	3.01041e-07	-0.343106	1	1	0.0110184
LRP5	3.01051e-07	-0.326005	0.018	0.133	0.0110188
ATP5PF	3.02248e-07	0.316379	0.784	0.631	0.0110626
MRPL42	3.06859e-07	0.191255	0.247	0.125	0.0112313
MRPL57	3.0708e-07	0.232038	0.471	0.295	0.0112394
NUPR1	3.08817e-07	-0.574908	0.238	0.384	0.011303
RPL5	3.19614e-07	-0.321809	1	0.991	0.0116982
MIDN	3.24848e-07	0.34711	0.555	0.388	0.0118898
CCDC107	3.31732e-07	0.149214	0.286	0.153	0.0121417
IFIT1	3.32453e-07	0.264498	0.326	0.185	0.0121681
ZNF704	3.631e-07	0.130197	0.159	0.069	0.0132898
PDGFB	3.68637e-07	0.25932	0.639	0.44	0.0134925
FN1	3.70835e-07	0.19757	0.229	0.117	0.0135729
CD24	3.75307e-07	0.126868	0.035	0.006	0.0137366
ATP8A1	3.83578e-07	0.162027	0.132	0.053	0.0140393
SDC3	4.02638e-07	0.146507	0.106	0.038	0.0147369
ELF1	4.12682e-07	0.282619	0.489	0.321	0.0151046
MDK	4.25038e-07	0.167485	0.357	0.204	0.0155568
DUSP6	4.40639e-07	0.318122	0.348	0.212	0.0161278
HMGXB3	4.47455e-07	0.148833	0.225	0.113	0.0163773
SERPING1	4.56442e-07	0.306913	0.621	0.457	0.0167062
CCDC85B	4.61473e-07	0.271192	0.885	0.773	0.0168904
XAF1	4.78371e-07	0.308024	0.493	0.327	0.0175089
FES	4.93384e-07	0.183061	0.176	0.08	0.0180583
ING1	4.98165e-07	0.239944	0.189	0.089	0.0182333
ZNF428	5.03452e-07	0.160689	0.361	0.205	0.0184269
CEMIP2	5.22443e-07	0.165333	0.176	0.081	0.0191219
PDHB	5.2799e-07	0.133135	0.308	0.166	0.0193249
CAMK1D	5.47325e-07	0.127111	0.189	0.088	0.0200327
CSRP2	5.88048e-07	-0.487022	0.093	0.227	0.0215231
RALB	6.11497e-07	0.27243	0.419	0.261	0.0223814
TAGLN2	6.13279e-07	0.249009	0.952	0.894	0.0224466
DIPK2B	6.40417e-07	-0.531197	0.317	0.436	0.0234399
LHX6	6.47635e-07	-0.35533	0.031	0.145	0.0237041
APOL3	6.90157e-07	0.191109	0.445	0.281	0.0252605
RASA4	6.91589e-07	-0.406625	0.044	0.163	0.0253128
CNDP2	7.04725e-07	0.177463	0.203	0.099	0.0257936
AIMP1	7.26456e-07	0.259061	0.441	0.281	0.026589
ARPC2	7.53048e-07	0.375845	0.709	0.544	0.0275623
RPL3	7.62012e-07	-0.274194	1	0.999	0.0278904
SNHG6	7.6287e-07	-0.434143	0.722	0.765	0.0279218
RABGAP1	7.96161e-07	0.149143	0.233	0.118	0.0291403
JCAD	8.04553e-07	0.289888	0.392	0.244	0.0294474
COX17	8.21464e-07	0.324443	0.476	0.312	0.0300664
PKIG	8.23563e-07	0.259021	0.423	0.266	0.0301432
TOB1	8.48636e-07	0.1206	0.185	0.086	0.0310609
JUNB	8.7594e-07	0.450521	0.965	0.921	0.0320603
BTG3	9.39929e-07	0.140075	0.207	0.101	0.0344023
CCL2	9.58273e-07	0.847687	0.366	0.23	0.0350738
PSIP1	9.93856e-07	0.248841	0.617	0.421	0.0363761
KNOP1	1.0176e-06	0.146389	0.366	0.216	0.037245
RASAL2	1.08524e-06	-0.469571	0.123	0.253	0.0397208
RNASEH2B	1.13445e-06	0.103592	0.128	0.052	0.0415219
IFI44L	1.14383e-06	0.233936	0.419	0.259	0.0418654
RPS9	1.16674e-06	-0.261715	1	0.994	0.0427039
PLK3	1.19005e-06	0.157612	0.172	0.079	0.0435569
TOMM6	1.19866e-06	0.270141	0.485	0.312	0.043872
CTTNBP2	1.20107e-06	-0.283495	0.009	0.11	0.0439605
H2AFZ	1.2075e-06	0.307543	0.656	0.491	0.0441956
FOXK2	1.23465e-06	0.137077	0.15	0.066	0.0451894
EMC8	1.25342e-06	0.139989	0.185	0.088	0.0458763
BTBD6	1.25534e-06	0.135972	0.264	0.141	0.0459469
MT-ND5	1.29979e-06	-0.480852	0.969	0.964	0.0475735
ARL6IP1	1.30757e-06	-0.51313	0.463	0.549	0.0478582
BRI3	1.32837e-06	-0.440687	0.709	0.743	0.0486198
UPF3B	1.33193e-06	0.121797	0.181	0.085	0.04875
AC020916.1	1.42381e-06	0.250704	0.419	0.257	0.0521128
CALCRL	1.43309e-06	-0.546015	0.291	0.41	0.0524525
RPL35	1.4373e-06	-0.275167	1	0.994	0.0526065
RPL19	1.45754e-06	-0.260646	1	0.998	0.0533473
SWAP70	1.46191e-06	0.185449	0.546	0.362	0.0535073
NEU1	1.50039e-06	0.130153	0.278	0.149	0.0549156
IQCK	1.5111e-06	0.199598	0.181	0.086	0.0553079
GIMAP4	1.54624e-06	0.30247	0.859	0.735	0.0565938
BLOC1S1	1.56795e-06	0.253091	0.463	0.299	0.0573884
MRPL58	1.5938e-06	0.24727	0.159	0.072	0.0583347
NFE2L1	1.61951e-06	-0.514698	0.427	0.507	0.0592756
IFI35	1.65413e-06	0.195078	0.291	0.163	0.0605427
NELFB	1.69009e-06	0.115775	0.211	0.105	0.0618588
NAV1	1.76607e-06	0.135864	0.181	0.086	0.06464
NFIX	1.78501e-06	0.140605	0.189	0.092	0.065333
EXOC2	1.87205e-06	0.176649	0.11	0.044	0.068519
CCNI	1.87409e-06	-0.457219	0.67	0.71	0.0685936
RAD50	1.88575e-06	0.130283	0.145	0.064	0.0690203
ENPP4	1.94287e-06	0.103012	0.211	0.105	0.071111
MAP7D1	1.95033e-06	0.17259	0.282	0.157	0.0713839
AC008875.3	2.10036e-06	0.163943	0.326	0.185	0.0768754
SHFL	2.1032e-06	0.173894	0.308	0.176	0.0769793
RAI14	2.11536e-06	-0.471781	0.181	0.315	0.0774244
RAB13	2.11715e-06	-0.48623	0.665	0.714	0.0774897
TSHZ2	2.17437e-06	-0.556729	0.449	0.55	0.0795841
VAMP5	2.20206e-06	-0.482419	0.621	0.678	0.0805977
RPS19	2.25994e-06	-0.272947	1	0.999	0.0827162
FAM214A	2.27832e-06	0.180216	0.198	0.1	0.0833886
JMJD1C	2.33032e-06	0.225158	0.449	0.285	0.0852922
RHOU	2.41051e-06	-0.378039	0.048	0.161	0.0882272
PDLIM1	2.4273e-06	-0.474496	0.692	0.75	0.0888415
CLTB	2.48198e-06	0.21155	0.414	0.259	0.0908429
CASKIN2	2.51936e-06	0.206442	0.273	0.151	0.092211
DGCR6L	2.66661e-06	0.167414	0.282	0.158	0.0976007
ADAMTS1	2.67562e-06	0.660377	0.441	0.297	0.0979303
UBE2S	2.71005e-06	0.106592	0.198	0.097	0.0991905
FADS3	2.83984e-06	0.116987	0.159	0.073	0.103941
FMO2	2.95252e-06	0.129252	0.053	0.014	0.108065
BHLHE40	3.14297e-06	0.218986	0.454	0.3	0.115036
MMP28	3.14729e-06	-0.492868	0.247	0.38	0.115194
FURIN	3.15475e-06	0.144749	0.225	0.117	0.115467
RASGRF2	3.24601e-06	0.146433	0.15	0.069	0.118807
CAPZA2	3.27797e-06	0.304376	0.577	0.418	0.119977
AHR	3.40435e-06	0.247104	0.573	0.405	0.124603
EFCAB14	3.5066e-06	0.180788	0.379	0.23	0.128345
UBL5	3.51874e-06	0.268462	0.802	0.644	0.128789
EIF4G2	3.54513e-06	0.330592	0.661	0.516	0.129755
IRF9	3.55575e-06	0.311923	0.357	0.222	0.130144
TGOLN2	3.56367e-06	0.186193	0.559	0.366	0.130434
RAB11A	3.68725e-06	-0.429593	0.59	0.642	0.134957
RPL10A	3.69247e-06	-0.291869	0.991	0.99	0.135148
AKR1B1	3.76671e-06	0.134534	0.141	0.062	0.137865
FDPS	3.81243e-06	0.226581	0.564	0.407	0.139539
MEOX2	3.90261e-06	-0.359351	0.11	0.238	0.142839
AGAP2-AS1	3.98011e-06	0.125741	0.106	0.042	0.145676
FCGRT	4.19026e-06	-0.493615	0.617	0.64	0.153368
CD46	4.56507e-06	0.208251	0.498	0.334	0.167086
ATP1B3	4.57806e-06	0.392916	0.524	0.371	0.167561
RPS25	4.611e-06	-0.271951	1	0.994	0.168767
SESTD1	4.70509e-06	0.224364	0.181	0.089	0.172211
TBX1	4.82855e-06	-0.428961	0.225	0.35	0.17673
CAST	4.84418e-06	-0.41169	0.824	0.845	0.177302
SYNE2	5.12582e-06	0.288143	0.859	0.742	0.18761
PBX2	5.24598e-06	0.141556	0.167	0.08	0.192008
CYGB	5.35099e-06	0.141505	0.185	0.093	0.195852
C21orf91	5.72006e-06	-0.309498	0.035	0.14	0.20936
ADIPOR2	6.09591e-06	0.175789	0.198	0.103	0.223117
RPS3A	6.62127e-06	-0.281922	1	0.996	0.242345
CYSTM1	6.70834e-06	0.227859	0.595	0.414	0.245532
C1QTNF1	6.76679e-06	-0.291467	0.022	0.117	0.247671
CCDC69	6.79298e-06	-0.500081	0.304	0.416	0.24863
TSPAN18	6.84593e-06	-0.35283	0.119	0.243	0.250568
HLA-DQA1	6.87926e-06	-0.532102	0.163	0.287	0.251788
DYNLT3	6.97341e-06	0.143221	0.154	0.073	0.255234
WWC2	7.119e-06	0.144101	0.15	0.07	0.260562
WDR18	7.12812e-06	0.102257	0.154	0.072	0.260896
SLC38A1	7.26818e-06	-0.317513	0.031	0.129	0.266023
CARD6	7.57058e-06	0.120042	0.194	0.099	0.277091
KDM6B	7.62198e-06	0.104033	0.172	0.084	0.278972
HLX	7.67336e-06	0.104706	0.088	0.033	0.280853
OTULINL	7.72619e-06	-0.286918	0.013	0.104	0.282786
CTNNAL1	7.78979e-06	-0.452917	0.181	0.3	0.285114
GATA2	8.13764e-06	0.240568	0.405	0.264	0.297846
SURF2	8.3947e-06	0.130634	0.115	0.048	0.307254
FAM241A	8.43402e-06	-0.466512	0.207	0.325	0.308694
PPP4R2	8.45777e-06	0.157418	0.26	0.147	0.309563
WWC3	8.57417e-06	0.11638	0.211	0.111	0.313823
RPL13A	8.90318e-06	-0.254729	0.996	0.995	0.325865
CAV2	9.17976e-06	0.235068	0.696	0.537	0.335988
ATP6V1G1	9.49859e-06	0.190348	0.696	0.521	0.347658
WSB1	9.66328e-06	0.162439	0.559	0.389	0.353686
ASPSCR1	9.75751e-06	0.140669	0.132	0.059	0.357135
BISPR	1.00264e-05	0.102004	0.062	0.019	0.366976
AL391121.1	1.0183e-05	0.136807	0.084	0.031	0.372709
GPATCH11	1.0266e-05	0.193902	0.22	0.12	0.375745
RRBP1	1.03718e-05	-0.499868	0.432	0.526	0.379619
GATA2-AS1	1.07829e-05	0.119313	0.128	0.057	0.394665
ANGPTL2	1.08393e-05	0.136119	0.203	0.107	0.396728
GPANK1	1.14221e-05	0.176839	0.22	0.118	0.418061
ABO	1.17414e-05	0.104404	0.093	0.036	0.429747
LARP7	1.20094e-05	0.18104	0.476	0.311	0.439556
CCSER2	1.30454e-05	0.182572	0.278	0.164	0.477475
RPS29	1.34045e-05	-0.233591	1	0.998	0.490619
PEX10	1.35983e-05	0.116363	0.132	0.06	0.497712
ECSCR	1.37767e-05	-0.39015	0.775	0.803	0.50424
LSM7	1.38543e-05	0.210328	0.542	0.382	0.507081
FASTK	1.40747e-05	0.191834	0.145	0.07	0.51515
TRIM69	1.43673e-05	0.122653	0.132	0.06	0.525856
GPRC5B	1.46039e-05	0.173063	0.238	0.134	0.534518
APCDD1	1.4884e-05	0.137933	0.233	0.13	0.544771
CADM3-AS1	1.49731e-05	-0.231364	0.004	0.085	0.548029
ESAM	1.49784e-05	0.207633	0.74	0.558	0.548226
CLIC4	1.50411e-05	0.196504	0.436	0.292	0.550519
DUSP11	1.55398e-05	0.136388	0.181	0.092	0.568773
PPP1R15A	1.63746e-05	0.344441	0.696	0.55	0.599326
SKA2	1.64633e-05	0.127141	0.119	0.052	0.602574
BLOC1S2	1.69471e-05	0.181513	0.189	0.099	0.620282
DNTTIP2	1.69955e-05	0.231703	0.357	0.229	0.622054
MYO6	1.70427e-05	0.151485	0.242	0.136	0.623779
CASTOR1	1.74039e-05	0.112053	0.11	0.047	0.636999
ZNF521	1.8271e-05	-0.391091	0.123	0.233	0.668736
TIAM1	1.84621e-05	-0.254014	0.031	0.125	0.675732
SMIM15	1.86859e-05	0.137335	0.159	0.079	0.683922
EPSTI1	1.92745e-05	0.20636	0.15	0.074	0.705467
DOC2B	1.94479e-05	-0.342992	0.115	0.23	0.711813
H1F0	1.94708e-05	0.208346	0.211	0.117	0.712652
TCF12	1.96268e-05	0.124169	0.247	0.139	0.718361
NNMT	1.98678e-05	-0.610807	0.189	0.302	0.72718
STMP1	2.01882e-05	0.131006	0.247	0.14	0.738909
ANXA6	2.05821e-05	-0.208946	0.009	0.09	0.753326
HOXD10	2.15684e-05	0.105207	0.194	0.101	0.789424
CSRNP1	2.16416e-05	0.16536	0.291	0.173	0.792106
RAC1	2.187e-05	0.246599	0.947	0.834	0.800463
DOCK11	2.26889e-05	-0.28908	0.04	0.133	0.830438
ARHGAP31	2.31906e-05	0.180039	0.339	0.209	0.8488
AC004540.1	2.35724e-05	0.106186	0.15	0.072	0.862772
ABHD17A	2.38167e-05	0.194889	0.476	0.317	0.871715
CADM3	2.43077e-05	-0.273266	0.013	0.095	0.889685
ATP1A1	2.46292e-05	0.20485	0.656	0.476	0.901453
SUCLG1	2.48067e-05	0.11773	0.278	0.161	0.907952
RNF214	2.50031e-05	0.180926	0.154	0.077	0.915137
IGFBP2	2.59108e-05	0.13458	0.559	0.391	0.948362
TRAK1	2.75673e-05	0.136719	0.11	0.048	1
RPL14	2.95535e-05	-0.238943	0.991	0.989	1
STIM2	2.97931e-05	0.133967	0.304	0.186	1
CD58	2.99614e-05	0.141646	0.181	0.094	1
MT-ND4	3.12579e-05	-0.414219	1	0.992	1
RHEB	3.20197e-05	0.210635	0.383	0.247	1
PDLIM5	3.22114e-05	0.181723	0.511	0.36	1
RAPGEF2	3.2353e-05	0.169391	0.22	0.124	1
RNF5	3.24984e-05	0.108539	0.233	0.131	1
RABL6	3.46551e-05	0.135106	0.278	0.165	1
ABCG2	3.54002e-05	-0.245391	0.026	0.113	1
GGT5	3.55846e-05	-0.429092	0.145	0.25	1
RN7SL832P	3.5664e-05	0.117109	0.101	0.043	1
OSBPL1A	3.58553e-05	-0.527667	0.348	0.43	1
ATP8A2	3.69091e-05	-0.221949	0.013	0.092	1
PCDH1	3.83091e-05	0.144299	0.207	0.115	1
MEF2A	3.85736e-05	0.332853	0.546	0.394	1
SNHG7	3.90138e-05	-0.34014	0.784	0.824	1
PPFIA1	3.90281e-05	0.149223	0.225	0.127	1
LRMDA	3.92159e-05	0.15404	0.216	0.119	1
RAPGEF1	4.13176e-05	0.160575	0.278	0.168	1
EPB41L2	4.14761e-05	0.151377	0.22	0.125	1
NME2	4.25304e-05	-0.274612	0.925	0.933	1
RPLP1	4.35618e-05	-0.193656	1	1	1
CHSY1	4.43517e-05	0.119179	0.278	0.163	1
PNN	4.45604e-05	0.173088	0.441	0.288	1
PARP1	4.70174e-05	0.144264	0.335	0.21	1
SLC15A3	4.7324e-05	0.115183	0.137	0.066	1
ZDHHC20	5.00408e-05	0.202731	0.278	0.168	1
MYL12A	5.02182e-05	-0.29354	0.877	0.893	1
CNOT6L	5.1816e-05	0.161291	0.339	0.219	1
GRN	5.20372e-05	-0.465424	0.467	0.545	1
CD14	5.25385e-05	-0.307048	0.048	0.142	1
SLC2A3	5.29386e-05	-0.525438	0.379	0.486	1
H3F3A	5.30452e-05	0.19954	0.978	0.948	1
RGCC	5.30812e-05	0.140277	0.119	0.055	1
AHNAK	5.49853e-05	-0.395205	0.828	0.845	1
LINC01116	5.50887e-05	0.138702	0.326	0.201	1
MGAT1	5.52382e-05	0.219841	0.383	0.253	1
DDX1	5.54781e-05	0.206923	0.41	0.272	1
RBP7	5.55783e-05	0.509914	0.405	0.293	1
PLSCR4	5.69152e-05	-0.386469	0.172	0.284	1
TRMT10C	5.70626e-05	0.162065	0.242	0.143	1
FNBP1	5.79376e-05	0.176181	0.264	0.158	1
METRNL	5.85548e-05	-0.39946	0.216	0.333	1
TLE1	5.94294e-05	0.175374	0.264	0.159	1
MYO1C	6.34935e-05	0.181338	0.392	0.256	1
ATN1	6.36486e-05	0.161281	0.313	0.195	1
CDKN2D	6.46314e-05	0.240333	0.247	0.148	1
CWF19L2	6.50122e-05	0.139331	0.37	0.236	1
TAX1BP1	6.67592e-05	0.243001	0.511	0.366	1
SUPT5H	6.69098e-05	0.131041	0.291	0.178	1
NDUFAF3	6.72189e-05	0.157647	0.379	0.246	1
ASRGL1	6.90855e-05	0.102418	0.115	0.053	1
PRKAG2	6.93472e-05	-0.351052	0.101	0.201	1
CIC	6.94095e-05	0.127266	0.211	0.118	1
DACH1	6.95029e-05	0.179379	0.216	0.124	1
TSPAN15	6.99842e-05	0.10383	0.154	0.078	1
RPS17	7.16915e-05	-0.301468	0.969	0.972	1
VAMP7	7.33228e-05	0.129228	0.128	0.062	1
HNRNPA2B1	7.36001e-05	0.266474	0.846	0.745	1
KLHL5	7.43954e-05	0.135244	0.242	0.144	1
MTFR1L	7.4478e-05	0.110858	0.097	0.041	1
ITPRIP	7.47188e-05	0.155905	0.123	0.059	1
TCF7L2	7.56953e-05	0.108419	0.295	0.179	1
MYOF	7.59163e-05	-0.369173	0.291	0.396	1
RPLP0	7.7575e-05	-0.24992	0.996	0.977	1
BAIAP2	7.78903e-05	-0.352511	0.101	0.199	1
DUSP5	7.86695e-05	0.102274	0.198	0.109	1
CTCF	7.90366e-05	0.173062	0.278	0.171	1
VCAN	8.18825e-05	-0.245001	0.004	0.072	1
FGR	8.21746e-05	0.126765	0.115	0.053	1
NCOA1	8.39381e-05	0.125977	0.211	0.122	1
SLCO2A1	8.48929e-05	-0.310758	0.062	0.153	1
SET	8.57947e-05	0.262221	0.85	0.742	1
APLP2	8.7773e-05	0.302681	0.7	0.558	1
MXD4	8.88681e-05	0.167083	0.282	0.175	1
PRPSAP1	8.95027e-05	-0.384803	0.172	0.274	1
SMARCA2	8.96954e-05	0.156724	0.379	0.247	1
APP	8.99336e-05	0.201592	0.837	0.715	1
ATMIN	9.33296e-05	0.113449	0.167	0.089	1
ZRSR2	9.45177e-05	0.122437	0.159	0.083	1
RPL6	9.57933e-05	-0.264398	1	0.993	1
SMARCE1	9.65835e-05	0.165484	0.551	0.379	1
GUCY1A1	9.72568e-05	0.10613	0.176	0.095	1
CYB5R3	9.76503e-05	0.153374	0.797	0.63	1
HLA-F	9.82377e-05	0.162683	0.599	0.462	1
MATN2	0.000100627	-0.239956	0.048	0.139	1
TPR	0.000103289	0.261961	0.546	0.404	1
RPL28	0.000104211	-0.249673	0.991	0.998	1
INO80E	0.00010447	0.130934	0.163	0.087	1
YME1L1	0.000107625	0.259268	0.445	0.302	1
GABARAPL1	0.000107711	0.163533	0.344	0.223	1
SEC11A	0.000107717	-0.332898	0.626	0.674	1
GBP4	0.000112114	-0.43289	0.313	0.411	1
OSBPL9	0.000113667	0.259407	0.207	0.12	1
DAD1	0.000115654	0.166449	0.753	0.584	1
CCNG2	0.000115892	-0.321487	0.075	0.163	1
HPCAL1	0.000118457	0.137486	0.33	0.209	1
PAQR4	0.000118466	0.105567	0.062	0.022	1
ADGRA2	0.000118719	-0.343934	0.075	0.166	1
RPL29	0.000122279	-0.245369	1	0.995	1
GNS	0.000123641	-0.395193	0.181	0.277	1
EEF1D	0.000124831	0.227866	0.978	0.903	1
STARD9	0.000125458	-0.338769	0.088	0.182	1
ANAPC15	0.00013013	0.106038	0.185	0.102	1
MAN1A1	0.00013039	-0.330691	0.097	0.188	1
RPLP2	0.000133772	-0.201151	1	0.997	1
RRAGA	0.000134437	0.162962	0.326	0.21	1
PSMC3	0.000135795	0.164293	0.48	0.336	1
COMT	0.000136456	0.106101	0.269	0.161	1
BUD31	0.000140556	0.158975	0.449	0.31	1
ARID5A	0.000142457	0.149118	0.207	0.121	1
RBFA	0.000142601	0.113328	0.211	0.122	1
SLC40A1	0.000145442	-0.275746	0.066	0.156	1
EPHA4	0.000145999	0.162223	0.233	0.137	1
RBM6	0.00015001	0.141199	0.242	0.144	1
SLC25A11	0.000151055	0.112507	0.216	0.125	1
AMIGO2	0.000158028	-0.195789	0.013	0.082	1
SYT15	0.000159113	-0.225835	0.022	0.095	1
CEBPG	0.000160671	0.123649	0.278	0.172	1
CD320	0.000160703	0.228076	0.612	0.471	1
ROBO4	0.000166146	-0.444916	0.339	0.414	1
TUBA1A	0.000167155	0.236305	0.608	0.476	1
RND3	0.000169671	0.135061	0.062	0.023	1
SNHG29	0.000176049	-0.347898	0.921	0.892	1
ARL8B	0.000176442	0.128394	0.211	0.124	1
EMC4	0.000176468	0.136554	0.339	0.225	1
AMZ2	0.000181939	0.154606	0.097	0.044	1
HLA-DPA1	0.000185192	-0.531253	0.74	0.737	1
RAB11FIP5	0.000187292	-0.255475	0.062	0.147	1
TBC1D1	0.000188739	0.16952	0.233	0.14	1
DDX3Y	0.00018895	0.176737	0.322	0.21	1
SMAP1	0.000192758	0.108676	0.251	0.153	1
SLC48A1	0.000194056	0.100928	0.203	0.116	1
CCNH	0.000197871	0.133947	0.141	0.073	1
ANP32B	0.000199004	-0.37574	0.568	0.625	1
NUMB	0.00020176	0.133793	0.247	0.15	1
GJC2	0.000201967	-0.226488	0.022	0.093	1
VEZF1	0.000202114	0.138276	0.348	0.231	1
MTX1	0.000203663	0.115396	0.216	0.129	1
PGP	0.000204411	0.155134	0.211	0.124	1
CD151	0.000204765	-0.3402	0.744	0.753	1
ANAPC16	0.000205942	0.187466	0.59	0.441	1
IER3	0.000206955	-1.01587	0.696	0.717	1
HIST1H4C	0.00020745	0.193734	0.476	0.343	1
SERPINE1	0.000207689	-0.393709	0.053	0.134	1
PIK3C2B	0.000208526	0.111193	0.198	0.113	1
WASL	0.000209037	0.119774	0.304	0.192	1
AKR1C3	0.000211525	-0.343172	0.427	0.52	1
TSPAN4	0.000212183	-0.421126	0.529	0.585	1
LIMS2	0.000212759	0.223913	0.502	0.373	1
PLCXD3	0.000215232	-0.197614	0	0.057	1
NBL1	0.000215526	-0.413854	0.273	0.369	1
TLL1	0.00021656	-0.227444	0.026	0.098	1
CEP85L	0.000217221	0.142969	0.242	0.147	1
CALD1	0.000218552	0.396829	0.643	0.526	1
RPL35A	0.000224476	-0.216009	1	0.997	1
WDR13	0.000225021	0.104763	0.361	0.231	1
CYP51A1	0.0002269	0.15073	0.189	0.11	1
TAP2	0.000236514	0.152367	0.242	0.149	1
TMOD1	0.000237713	-0.257061	0.04	0.117	1
KLF3	0.0002438	0.218075	0.564	0.416	1
SRSF11	0.000244655	0.1698	0.621	0.47	1
NOP53	0.000246403	-0.256175	0.868	0.85	1
RAB10	0.00024741	0.102419	0.339	0.218	1
EEF2	0.000247701	-0.349369	0.811	0.817	1
TGM2	0.000248385	0.100377	0.123	0.062	1
CHD3	0.000249993	0.126087	0.141	0.074	1
ALDH2	0.000252435	-0.254291	0.088	0.182	1
DOCK1	0.000254423	0.144488	0.282	0.176	1
SKP1	0.000261051	0.177464	0.767	0.618	1
ARHGEF15	0.00026297	0.131301	0.247	0.152	1
LAMTOR5	0.000266932	0.109951	0.511	0.351	1
FOSL2	0.00027187	0.101102	0.3	0.189	1
WAPL	0.000272018	0.113533	0.229	0.136	1
IFITM2	0.000286216	0.179255	0.952	0.933	1
NDUFA7	0.0002924	0.143594	0.37	0.25	1
MET	0.000306896	0.111812	0.256	0.159	1
DIAPH2	0.000314269	0.158232	0.322	0.217	1
TACSTD2	0.000320619	-0.208095	0.031	0.104	1
PRDX4	0.000321268	-0.421808	0.322	0.403	1
RIN2	0.000321625	0.133084	0.207	0.123	1
C17orf49	0.000322984	0.117715	0.529	0.383	1
ARHGDIB	0.000324865	-0.404969	0.264	0.351	1
ZNF385D	0.000329042	-0.380884	0.185	0.28	1
GTF3C6	0.000329463	0.115548	0.273	0.173	1
RPL36	0.000329759	-0.179759	1	0.994	1
EML2	0.000331194	0.101367	0.123	0.062	1
ARCN1	0.000332809	0.103746	0.269	0.169	1
ADGRL2	0.000337811	-0.255158	0.062	0.141	1
CALML4	0.000350935	-0.232293	0.057	0.138	1
PBX1	0.000364269	-0.309705	0.097	0.183	1
AHCYL1	0.000367575	0.145262	0.322	0.209	1
CRTAC1	0.000374088	-0.209002	0	0.053	1
HEXA	0.000374707	-0.294112	0.141	0.233	1
DNMT1	0.000374828	0.112743	0.159	0.087	1
ITGA6	0.000384818	-0.416532	0.687	0.706	1
PPL	0.000389657	-0.266798	0.11	0.202	1
PTGS2	0.000391687	0.157802	0.141	0.076	1
LRPAP1	0.00039331	0.139946	0.383	0.265	1
HOPX	0.000405032	-0.166263	0.013	0.076	1
RPS13	0.00042014	-0.224497	1	0.995	1
IFIT2	0.000423894	0.101713	0.203	0.123	1
DRAP1	0.000425267	0.114914	0.405	0.278	1
HIPK3	0.000440767	-0.317532	0.313	0.408	1
EEF1E1	0.000442356	0.125266	0.225	0.137	1
CHORDC1	0.000449499	0.133881	0.176	0.103	1
FGFR1	0.000454906	0.104167	0.207	0.124	1
EEF1B2	0.000460821	-0.326384	0.956	0.923	1
RBBP4	0.000471413	0.130842	0.322	0.212	1
PRPF40A	0.000478096	0.211991	0.419	0.3	1
OTUD6B	0.000484046	0.108967	0.093	0.043	1
EMILIN2	0.000489178	-0.222119	0.04	0.111	1
TRAPPC3	0.000493298	0.148652	0.286	0.185	1
TXNL1	0.000499571	0.135565	0.339	0.231	1
CSNK2B	0.000505191	0.141387	0.471	0.341	1
CRYBG1	0.000509295	0.114805	0.101	0.049	1
EMCN	0.000512843	0.173934	0.771	0.623	1
TUBB	0.000517464	-0.307165	0.661	0.687	1
RBMS3	0.000517623	0.123348	0.22	0.134	1
OAZ1	0.000521149	0.169212	0.771	0.633	1
PHTF1	0.000523952	0.121509	0.075	0.032	1
HCP5	0.000527047	0.111776	0.194	0.115	1
ANKS1A	0.000536004	-0.244499	0.07	0.151	1
C18orf32	0.000536177	0.150689	0.374	0.259	1
NFIB	0.000542853	-0.387593	0.599	0.642	1
PSMD8	0.000554551	0.150111	0.485	0.349	1
ABCD4	0.00058449	-0.30031	0.106	0.187	1
NRARP	0.000588559	0.230982	0.361	0.25	1
IFT43	0.000588892	0.120661	0.176	0.101	1
MARCKSL1	0.000592726	-0.275213	0.154	0.245	1
ACKR3	0.000593841	-0.230143	0.031	0.099	1
METTL7A	0.000600803	-0.287035	0.128	0.22	1
SNAPIN	0.000604861	0.168579	0.181	0.108	1
HAPLN3	0.000607544	-0.302387	0.075	0.152	1
RPL41	0.000608489	-0.199773	1	1	1
F2R	0.000613258	-0.290369	0.115	0.2	1
CITED4	0.000613571	0.148428	0.167	0.098	1
ZEB2	0.00061836	0.106486	0.088	0.041	1
RPS3	0.000621021	-0.241028	0.996	0.992	1
OSBPL10	0.000629533	-0.250403	0.053	0.124	1
PHYH	0.000630958	0.123536	0.189	0.112	1
FUBP1	0.000631874	0.121679	0.242	0.155	1
MTDH	0.000635739	-0.327965	0.564	0.602	1
IRF2BPL	0.000644433	0.230087	0.225	0.142	1
CALU	0.000644835	0.11344	0.396	0.275	1
TJP1	0.000646575	0.293875	0.683	0.595	1
PABPC1	0.000655839	-0.357869	0.758	0.779	1
ZDHHC17	0.00067127	-0.283669	0.093	0.172	1
SLC39A7	0.000672743	0.163601	0.238	0.148	1
CAPZB	0.000681918	-0.360261	0.454	0.517	1
ALYREF	0.000692762	0.118953	0.198	0.121	1
MBOAT2	0.000693635	-0.167821	0.022	0.085	1
MPP1	0.000694904	-0.242035	0.053	0.124	1
FRMD4B	0.000707175	0.156912	0.405	0.296	1
EIF2AK4	0.000714681	0.10534	0.326	0.213	1
SYAP1	0.000717104	0.128768	0.264	0.174	1
SPATA13	0.000725451	0.102742	0.154	0.087	1
SNHG30	0.000736433	0.106569	0.159	0.091	1
AP3M2	0.000738493	0.134995	0.119	0.062	1
FRYL	0.000743811	0.149316	0.308	0.204	1
PPIC	0.000745313	-0.334613	0.251	0.341	1
PFKP	0.000760058	-0.299865	0.154	0.238	1
WARS	0.000760353	0.245771	0.326	0.226	1
PMPCB	0.000767005	0.102988	0.229	0.144	1
PRR5	0.000772626	-0.162204	0.013	0.071	1
NDUFA13	0.000777803	0.182791	0.771	0.629	1
STX10	0.000784405	0.127883	0.198	0.119	1
TUBA1C	0.00078577	0.125644	0.225	0.142	1
AC108134.3	0.000790364	0.125811	0.093	0.045	1
ATP5MC3	0.000813122	0.146659	0.419	0.302	1
PCAT19	0.000813512	-0.400145	0.74	0.748	1
WWTR1	0.00081794	-0.443115	0.441	0.503	1
H1FX	0.000823593	0.134996	0.687	0.531	1
TPRKB	0.000825226	0.176577	0.291	0.196	1
MARK2	0.000842131	0.188111	0.115	0.061	1
SLFN11	0.000842259	0.108473	0.159	0.091	1
APOD	0.000845714	-0.292068	0.088	0.171	1
SEC14L1	0.000846768	0.127381	0.546	0.421	1
ANXA5	0.00084999	0.215251	0.63	0.519	1
SHE	0.000856355	0.139162	0.304	0.206	1
TIMMDC1	0.000874243	0.103713	0.278	0.181	1
CTNNA1	0.000889902	0.188629	0.608	0.471	1
LINC00963	0.000893398	0.148258	0.216	0.136	1
CANX	0.000899574	-0.380666	0.529	0.567	1
IFRD1	0.000903499	0.127918	0.256	0.164	1
CLDN11	0.000909052	-0.293468	0.101	0.179	1
SP100	0.000912679	0.157991	0.586	0.468	1
CDC123	0.000916791	0.126698	0.26	0.17	1
ZNF608	0.00092931	-0.189158	0.031	0.094	1
LINC01197	0.000930285	-0.173939	0.018	0.075	1
ALDH1A2	0.000934298	-0.172054	0.022	0.082	1
ARPC5L	0.00093683	0.111014	0.383	0.27	1
HLA-DRB5	0.000948586	-0.503731	0.533	0.578	1
UFD1	0.00097625	0.152961	0.308	0.208	1
NOTCH1	0.000992239	0.121039	0.339	0.228	1
TPM3	0.000993057	-0.273625	0.903	0.882	1
TMED3	0.000994121	0.11127	0.093	0.046	1
BNC2	0.000998362	-0.156462	0.013	0.068	1
C1orf21	0.00100264	0.188261	0.445	0.323	1
ATP11C	0.00101371	-0.304169	0.154	0.235	1
RYR3	0.00102324	-0.163426	0.013	0.068	1
FAM204A	0.00104545	0.130073	0.467	0.333	1
UBLCP1	0.00104953	0.127945	0.159	0.092	1
AC091271.1	0.00105896	0.202666	0.132	0.075	1
LSM3	0.00106413	0.166659	0.419	0.302	1
RPS26	0.00107361	-0.269548	0.982	0.973	1
PCNP	0.00107474	0.143755	0.471	0.352	1
TRAPPC6A	0.00111205	-0.318598	0.172	0.252	1
NAA10	0.00112981	0.116632	0.423	0.303	1
FXYD5	0.00113695	-0.248122	0.784	0.786	1
UBC	0.00113907	0.185164	0.987	0.972	1
CCND1	0.00116068	-0.333558	0.216	0.307	1
EBPL	0.00118165	-0.318208	0.242	0.319	1
TMA16	0.00118519	0.108938	0.216	0.134	1
LRATD2	0.00118662	-0.358381	0.181	0.26	1
ZSCAN16-AS1	0.00120782	0.124751	0.141	0.08	1
ARMCX3	0.00121856	0.117176	0.295	0.196	1
FERMT2	0.00122002	0.122017	0.313	0.211	1
CSNK1A1	0.00123687	0.149377	0.577	0.47	1
EMC2	0.00123842	0.117609	0.238	0.153	1
PDE4A	0.00125705	0.105383	0.119	0.063	1
MTUS1	0.00127266	0.158617	0.696	0.578	1
WTIP	0.00127314	-0.133263	0.004	0.052	1
TBCC	0.00129508	0.116939	0.145	0.084	1
AP2B1	0.00130962	0.14128	0.529	0.398	1
PIK3C2A	0.0013103	0.152024	0.383	0.282	1
FLT1	0.00131481	0.150154	0.537	0.418	1
EIF3E	0.00132845	-0.273494	0.656	0.696	1
ATP5ME	0.00134554	0.165478	0.775	0.651	1
ARRDC3	0.00135476	0.100632	0.194	0.12	1
CAPG	0.00136035	-0.246498	0.075	0.147	1
MRPS34	0.00136616	0.183233	0.352	0.247	1
PIN1	0.00137014	0.133041	0.357	0.255	1
RPS10	0.00139256	-0.246618	0.982	0.968	1
RPL23A	0.0013932	-0.228056	0.996	0.973	1
STOM	0.00139391	0.135085	0.7	0.584	1
USP7	0.00139929	0.129455	0.26	0.171	1
LYST	0.00141548	-0.27039	0.115	0.195	1
MON1B	0.00145969	0.115106	0.159	0.094	1
ARL4C	0.00147055	-0.250336	0.066	0.135	1
CCDC25	0.00149649	0.15002	0.436	0.318	1
OFD1	0.00150532	0.121977	0.198	0.124	1
PALM2-AKAP2	0.00152116	-0.333233	0.577	0.623	1
CMIP	0.00153791	-0.376045	0.335	0.401	1
MYDGF	0.00153843	0.13783	0.427	0.312	1
HSPD1	0.00153892	-0.374269	0.449	0.502	1
GALNT15	0.00154054	-0.229731	0.035	0.096	1
HERC5	0.00154365	0.115446	0.233	0.153	1
HSBP1	0.00155553	0.117771	0.476	0.346	1
GPS2	0.00156557	0.179475	0.476	0.358	1
FLI1	0.00160152	-0.359567	0.278	0.353	1
CDK2AP2	0.00161963	0.109593	0.229	0.147	1
CSNK2A2	0.00162736	0.113064	0.238	0.155	1
CYTH2	0.0016287	0.132929	0.211	0.136	1
ERCC1	0.00164695	0.140978	0.163	0.097	1
CYYR1	0.0016495	0.18337	0.617	0.506	1
RPL21	0.00165538	-0.196668	1	0.997	1
CCL21	0.00167104	-0.157023	0.93	0.946	1
ELOB	0.00168174	0.151926	0.837	0.734	1
ITGA2	0.00168804	-0.258594	0.066	0.134	1
AC097534.2	0.0016894	0.116717	0.22	0.141	1
GRB10	0.00170151	-0.302061	0.115	0.187	1
SERTAD1	0.00170354	0.182363	0.427	0.324	1
ZBTB20	0.00173529	-0.372183	0.379	0.449	1
PSMD1	0.00174268	0.108279	0.278	0.185	1
CHMP2A	0.00174324	0.164038	0.595	0.482	1
RPF2	0.00177725	0.212212	0.251	0.171	1
GABARAPL2	0.00179812	0.175404	0.608	0.488	1
RAB3C	0.0018059	-0.17302	0.022	0.077	1
TCEA3	0.00181037	-0.184948	0.026	0.082	1
RPS7	0.0018265	-0.220427	1	0.991	1
CCNL1	0.00184005	0.252027	0.59	0.484	1
EIF5A	0.00184305	0.118347	0.555	0.422	1
ADGRG6	0.00184848	-0.12888	0.004	0.049	1
CDON	0.00184996	-0.141653	0.009	0.056	1
POLR2E	0.00185649	0.167954	0.366	0.27	1
CDKN1B	0.001871	0.188116	0.264	0.186	1
CCDC3	0.00187979	0.104325	0.529	0.387	1
RPL9	0.00190301	-0.182624	0.991	0.993	1
RACK1	0.00190508	-0.246135	0.982	0.971	1
TRA2B	0.00191173	0.199214	0.595	0.473	1
VIM	0.0019214	-0.151259	1	1	1
OSER1	0.00194295	0.112837	0.194	0.121	1
KLF6	0.00197173	0.131573	0.828	0.714	1
AURKAIP1	0.00198507	0.155145	0.467	0.348	1
TRABD2B	0.00201064	-0.107291	0	0.04	1
FLNA	0.00201581	-0.252487	0.374	0.457	1
CMTM3	0.00204384	-0.170839	0.048	0.114	1
SGCB	0.00206399	0.121226	0.101	0.054	1
RAPGEF5	0.00207321	0.112261	0.26	0.175	1
TRAPPC5	0.00207701	0.117129	0.485	0.365	1
HNRNPR	0.00208071	0.176205	0.476	0.371	1
PALLD	0.00208634	-0.262257	0.088	0.16	1
SLC50A1	0.0020881	0.14248	0.154	0.093	1
ICAM1	0.00209975	-0.478187	0.247	0.323	1
C12orf57	0.00212748	0.212278	0.626	0.486	1
CDK2AP1	0.00213091	0.124305	0.366	0.259	1
BRD7	0.00213257	0.10967	0.445	0.321	1
TAF3	0.00215878	0.108556	0.203	0.129	1
JAK1	0.00217168	-0.307824	0.524	0.566	1
LSM4	0.00218483	0.114147	0.322	0.22	1
PTK2B	0.00218883	-0.266119	0.079	0.146	1
KMT2C	0.00219742	0.109035	0.313	0.219	1
NOSIP	0.00221197	0.121111	0.322	0.226	1
MT-ND4L	0.00222182	-0.292842	0.665	0.704	1
BMPR2	0.00222216	-0.433418	0.445	0.484	1
NFKBIA	0.00222451	-0.574507	0.683	0.685	1
ZBTB38	0.00227291	0.141255	0.507	0.379	1
DNAJB6	0.00229737	0.15448	0.445	0.333	1
RPL23	0.00230322	-0.265898	0.982	0.975	1
SERTAD4-AS1	0.00230911	0.184347	0.396	0.294	1
CORO2A	0.00233806	-0.146419	0.022	0.075	1
CPD	0.00234427	-0.244992	0.097	0.171	1
STAT1	0.00239021	0.123077	0.238	0.156	1
FRMD4A	0.0024234	0.161948	0.203	0.13	1
DCTN3	0.00243236	0.165482	0.41	0.301	1
EFEMP1	0.00247071	-0.671284	0.216	0.285	1
POLR2K	0.00254396	0.119128	0.379	0.268	1
OAZ2	0.0025515	0.108749	0.326	0.228	1
DLL1	0.00255917	-0.211827	0.053	0.116	1
PHAX	0.0025943	0.109287	0.238	0.157	1
REST	0.00260721	0.103565	0.291	0.199	1
ADD1	0.0026608	0.146284	0.423	0.311	1
ELK3	0.00266812	-0.310433	0.709	0.705	1
NTN4	0.00270304	-0.300773	0.163	0.235	1
EIF1AY	0.00270546	0.104772	0.203	0.129	1
ABHD6	0.00270907	-0.157415	0.018	0.066	1
ARID1A	0.00271756	0.116919	0.211	0.139	1
CYP1B1	0.00273636	-0.630952	0.145	0.213	1
SH3BGRL3	0.00277715	-0.266923	0.872	0.86	1
ARID4B	0.00279119	0.151212	0.476	0.375	1
BNIP3	0.00284248	-0.268984	0.137	0.211	1
MCMBP	0.00291563	0.107444	0.176	0.11	1
TAPBP	0.00298743	-0.37573	0.436	0.491	1
EEPD1	0.00299654	0.121669	0.093	0.049	1
RPL22	0.00301186	-0.184906	1	0.991	1
RNF139	0.00302524	0.148742	0.119	0.068	1
ODC1	0.00305733	-0.355334	0.167	0.241	1
KIAA2026	0.00306616	0.135605	0.313	0.217	1
GASK1B	0.00308067	-0.264098	0.181	0.259	1
YIF1A	0.00313126	0.131389	0.233	0.155	1
KIF17	0.00315327	0.115923	0.093	0.048	1
KRT7	0.00315752	-0.190986	0.026	0.078	1
MRRF	0.00319373	-0.198047	0.048	0.107	1
IFIH1	0.00320167	0.127405	0.172	0.107	1
IRF2	0.00325321	0.10847	0.313	0.22	1
IKBIP	0.00328391	-0.307318	0.176	0.249	1
GRPEL2	0.00330973	0.103736	0.079	0.04	1
RBM17	0.0033416	0.118765	0.458	0.342	1
UQCRQ	0.00340088	0.207406	0.683	0.545	1
FAM210B	0.00341399	-0.269077	0.15	0.222	1
IL6ST	0.00343299	-0.46515	0.568	0.58	1
LBH	0.00347634	-0.218062	0.062	0.124	1
PHF14	0.00348791	0.103521	0.366	0.263	1
HNRNPA1	0.00349627	-0.235138	0.859	0.847	1
BAALC	0.00351656	-0.14172	0.031	0.086	1
GBP1	0.00354286	0.198731	0.229	0.153	1
IFI44	0.0035833	0.168565	0.264	0.181	1
ADPRH	0.00360803	0.118909	0.088	0.047	1
GLUD1	0.0036123	0.119177	0.304	0.215	1
CHST7	0.00366342	-0.208775	0.044	0.099	1
DNASE1L3	0.0036727	-0.13807	0.018	0.066	1
PELI1	0.00367412	0.138052	0.141	0.085	1
ATXN7L3B	0.00368714	0.12775	0.352	0.245	1
CARD8	0.00374357	-0.302269	0.238	0.314	1
HMG20B	0.00377824	0.100189	0.269	0.184	1
GLCE	0.00379526	-0.137919	0.026	0.079	1
SNHG9	0.00379767	0.115089	0.308	0.218	1
WDR92	0.0038965	0.100422	0.079	0.041	1
CDC42	0.00389788	0.154376	0.881	0.763	1
PLA2G12A	0.00392253	0.12131	0.106	0.059	1
HNRNPUL1	0.00394553	0.124062	0.392	0.282	1
NUDT7	0.00396723	-0.103201	0.004	0.043	1
FAM171A1	0.00397154	-0.24246	0.066	0.126	1
UBE2Q2	0.00407512	0.129985	0.22	0.148	1
SAMD5	0.00410345	-0.116639	0.004	0.043	1
CFL1	0.00414101	0.212263	0.925	0.862	1
ZFYVE21	0.0041441	-0.327368	0.286	0.348	1
NFIA	0.00415173	-0.40326	0.542	0.571	1
NAP1L4	0.00417094	0.104545	0.278	0.195	1
RBP4	0.00422391	-0.10692	0	0.035	1
PDIA3	0.0042848	0.14251	0.687	0.569	1
CDH13	0.00435627	0.141546	0.542	0.44	1
UPP1	0.00439195	-0.359589	0.229	0.294	1
HMGB1	0.0044168	0.167828	0.978	0.966	1
RPS8	0.00443293	-0.145343	1	1	1
MAP1LC3A	0.00444316	-0.286431	0.154	0.221	1
POLR2L	0.00447013	-0.303941	0.841	0.822	1
CPNE8	0.00449932	0.156973	0.3	0.215	1
MGLL	0.00452759	-0.462311	0.546	0.564	1
SMARCA5	0.0045356	0.120405	0.357	0.263	1
ST8SIA6	0.00453822	-0.229311	0.053	0.11	1
FBLN2	0.0045388	-0.317375	0.238	0.316	1
SERPINB1	0.00455981	-0.324772	0.348	0.417	1
EIF5A2	0.00458834	0.129542	0.088	0.047	1
SOCS3	0.00460766	0.139864	0.815	0.755	1
GADD45G	0.00464447	0.12335	0.115	0.065	1
LITAF	0.00470869	0.127438	0.211	0.141	1
MYH9	0.00471369	-0.327258	0.678	0.693	1
SLC41A3	0.00477475	-0.264055	0.115	0.18	1
JUP	0.00480511	0.100765	0.163	0.103	1
C12orf75	0.00480573	-0.104298	0.004	0.042	1
DPYSL2	0.00481577	-0.276964	0.753	0.751	1
EHD4	0.00485088	-0.368807	0.291	0.344	1
DBNL	0.00486127	0.101729	0.247	0.169	1
TUBB4B	0.0048725	0.148238	0.639	0.524	1
SMAD1	0.00493375	-0.372679	0.432	0.474	1
TERF2IP	0.00505734	0.105622	0.414	0.312	1
MAP4	0.00507131	0.10397	0.476	0.366	1
HLA-DQB1	0.00507837	-0.532406	0.414	0.464	1
HOXD9	0.00538251	0.124798	0.388	0.291	1
ZFAS1	0.00543485	-0.334178	0.758	0.748	1
FAM133B	0.00545036	0.106684	0.405	0.301	1
IWS1	0.00548855	0.116287	0.159	0.099	1
SASH1	0.00550945	-0.310373	0.366	0.426	1
SLC2A4RG	0.00560967	-0.266851	0.145	0.213	1
UBTD1	0.00566064	-0.1575	0.044	0.099	1
UGCG	0.00568126	-0.282904	0.11	0.171	1
COX8A	0.00568191	0.14862	0.656	0.528	1
C6orf141	0.0056918	-0.171596	0.048	0.105	1
SOD2	0.00571043	-0.445246	0.339	0.4	1
NXPE3	0.00571637	-0.141447	0.026	0.075	1
EMP2	0.00571957	0.137596	0.621	0.499	1
VASP	0.00572834	0.165283	0.273	0.2	1
AC015912.3	0.0057587	0.108215	0.137	0.084	1
ARF4	0.00579904	0.101941	0.308	0.221	1
HSP90AA1	0.00587558	0.149097	0.903	0.842	1
PPP1R11	0.00592071	0.113341	0.167	0.109	1
GCHFR	0.00594548	-0.281329	0.154	0.219	1
RPS5	0.00597753	-0.218484	1	0.98	1
DDX3X	0.0059945	0.174081	0.612	0.516	1
DOCK9	0.00606922	0.118017	0.41	0.311	1
GSTM3	0.00613968	0.130986	0.141	0.087	1
GCH1	0.0061865	0.150101	0.053	0.024	1
ARFRP1	0.00619887	0.145609	0.207	0.136	1
NUAK1	0.00622236	-0.296882	0.388	0.436	1
HMGN3	0.00627435	-0.350289	0.427	0.46	1
LPCAT4	0.00634151	-0.175028	0.035	0.084	1
DNAJB1	0.00637049	0.204878	0.441	0.341	1
LHFPL2	0.00641385	-0.103417	0.009	0.047	1
PSMB6	0.00661696	0.132815	0.529	0.409	1
UFSP2	0.00663391	0.104045	0.291	0.21	1
SERP1	0.00666327	-0.342735	0.348	0.391	1
ATP5MC2	0.00667019	-0.253999	0.767	0.764	1
TNFAIP8L1	0.00674639	-0.228662	0.123	0.187	1
MLXIP	0.00697098	-0.233427	0.066	0.12	1
STOX2	0.00701683	-0.174206	0.048	0.102	1
PKN3	0.00701832	0.116505	0.207	0.139	1
PNRC1	0.00703954	0.137927	0.828	0.724	1
MAP4K4	0.00712782	0.115123	0.361	0.267	1
CNTNAP3B	0.0071884	-0.317396	0.167	0.228	1
EBF3	0.00719072	-0.305682	0.194	0.255	1
MYCT1	0.00720735	0.196689	0.458	0.365	1
KDR	0.00721194	0.180771	0.322	0.242	1
GALNT1	0.00727659	-0.262163	0.115	0.175	1
SRP19	0.0073242	0.103188	0.348	0.258	1
BCAP31	0.00738634	-0.28675	0.392	0.436	1
CRCP	0.00739814	-0.188887	0.079	0.138	1
NEURL1B	0.00747019	-0.195462	0.062	0.117	1
GAPVD1	0.00754309	0.157665	0.15	0.096	1
CSF2RB	0.00755532	-0.263905	0.115	0.176	1
UVRAG	0.00763209	0.110368	0.26	0.184	1
CRHBP	0.00769298	-0.100154	0.004	0.038	1
CDKN2AIP	0.00772998	0.109078	0.167	0.109	1
KTN1	0.00781334	-0.250823	0.815	0.811	1
MRPL52	0.00794297	0.150719	0.454	0.36	1
AFDN	0.00799715	0.133298	0.392	0.293	1
FAM214B	0.00805002	-0.157357	0.026	0.07	1
SULF1	0.0081328	0.241168	0.273	0.202	1
DDB2	0.00817745	-0.162235	0.053	0.105	1
PRDX5	0.00818646	0.12013	0.581	0.465	1
ARGLU1	0.00819659	0.123226	0.718	0.598	1
HNRNPU	0.0082259	0.174154	0.696	0.576	1
C14orf132	0.00826505	-0.155156	0.031	0.077	1
SESN3	0.00846302	-0.204482	0.101	0.166	1
DLG1	0.00847934	0.125572	0.137	0.087	1
H2AFY	0.0085541	0.113231	0.37	0.275	1
GET1	0.00855714	0.102628	0.119	0.071	1
CTSZ	0.0086789	-0.334647	0.449	0.479	1
C1orf35	0.00872706	0.132671	0.238	0.17	1
MALAT1	0.00895232	0.154024	1	0.999	1
COMMD6	0.00905055	-0.273572	0.736	0.741	1
CCDC66	0.00912666	0.102616	0.194	0.129	1
MYADM	0.0091991	0.157309	0.352	0.27	1
DOCK4	0.00925219	-0.282575	0.123	0.181	1
UQCRH	0.00927843	-0.234957	0.652	0.659	1
COQ7	0.00935556	0.11689	0.11	0.066	1
ATP5MG	0.00939152	0.102275	0.775	0.659	1
PLEKHA7	0.00945172	-0.118387	0.018	0.057	1
CPE	0.00948792	-0.236462	0.026	0.07	1
DDX24	0.00950937	0.143499	0.665	0.566	1
CD302	0.00954941	-0.252284	0.132	0.196	1
PLP2	0.00964173	0.126206	0.423	0.33	1
MARVELD1	0.00966439	-0.115238	0.018	0.058	1
CHST15	0.00967111	-0.142136	0.031	0.076	1
RPL27A	0.00969014	-0.159245	0.996	0.989	1
SARNP	0.0100898	0.109759	0.295	0.219	1
METTL5	0.0101802	0.118474	0.286	0.204	1
CHMP5	0.0102175	0.11245	0.436	0.341	1
PPM1F	0.01031	-0.211555	0.11	0.169	1
THRB	0.0103513	-0.100817	0.009	0.043	1
UHRF2	0.0104709	-0.142166	0.101	0.163	1
IQGAP1	0.0104749	0.125332	0.687	0.584	1
CNBP	0.010657	0.170993	0.758	0.627	1
GHITM	0.0107724	0.14705	0.441	0.339	1
MTM1	0.0107802	-0.116019	0.026	0.07	1
ATP10D	0.0108536	-0.110346	0.022	0.063	1
AGO2	0.010938	-0.155266	0.053	0.103	1
PLXNB2	0.0110736	-0.169955	0.057	0.109	1
TNFAIP8	0.0111596	-0.213091	0.079	0.132	1
RAB3IL1	0.0111827	-0.154537	0.04	0.085	1
MICOS10	0.0112719	0.100552	0.568	0.458	1
MYLIP	0.011376	-0.198958	0.084	0.14	1
FKBP10	0.0114279	-0.132462	0.057	0.109	1
LINC02147	0.0114563	-0.115285	0.013	0.05	1
CHRAC1	0.0115269	0.132055	0.247	0.177	1
TSSC4	0.0115459	0.113488	0.26	0.188	1
INHBB	0.0116609	-0.238462	0.062	0.112	1
FAT4	0.0119078	0.107219	0.128	0.079	1
ARFGEF3	0.0121027	-0.148075	0.04	0.086	1
HES1	0.0121214	0.166039	0.692	0.613	1
LINC01985	0.0121543	-0.117256	0.013	0.049	1
NOP58	0.0121551	0.105574	0.211	0.149	1
MRAP2	0.0123528	-0.114167	0.013	0.049	1
PFDN5	0.0125087	-0.163292	0.956	0.933	1
TBC1D4	0.0126166	-0.184907	0.101	0.159	1
ANXA3	0.0127861	0.152885	0.097	0.057	1
ARL2BP	0.0128208	0.158552	0.379	0.299	1
PTPRE	0.0129605	-0.280806	0.141	0.198	1
ROBO3	0.0130073	0.10966	0.115	0.071	1
TNFRSF1A	0.0131288	-0.287478	0.326	0.375	1
PNMT	0.0131848	-0.111495	0.022	0.062	1
WBP4	0.0132895	0.118635	0.304	0.225	1
AC103591.3	0.0133402	0.185785	0.198	0.136	1
NT5E	0.0134014	-0.160648	0.053	0.101	1
COX16	0.0134967	0.130068	0.379	0.293	1
FKBP11	0.013505	-0.256687	0.115	0.17	1
UBB	0.0137351	0.140122	0.837	0.781	1
LPAR6	0.0138499	0.155203	0.467	0.372	1
RAB11FIP1	0.0138503	-0.191646	0.084	0.138	1
HGSNAT	0.01394	-0.229792	0.106	0.159	1
PMP22	0.0139452	-0.266485	0.617	0.638	1
SCARA3	0.0140032	-0.249162	0.088	0.14	1
CDC25B	0.0140995	-0.213056	0.093	0.146	1
ANP32A	0.0141513	-0.243016	0.326	0.387	1
AAK1	0.0141594	0.173999	0.326	0.249	1
PCM1	0.0141735	0.129391	0.414	0.327	1
FBXL4	0.0146768	-0.101321	0.013	0.048	1
MPDZ	0.0147444	-0.287151	0.159	0.212	1
FAM50A	0.0147518	0.104775	0.242	0.175	1
PSMB5	0.0148647	0.109504	0.401	0.313	1
SSBP3	0.0150616	-0.157397	0.088	0.145	1
CSTB	0.0150668	-0.266153	0.449	0.473	1
SEPTIN10	0.01542	-0.303377	0.348	0.393	1
RPL37A	0.0157009	-0.140576	1	0.998	1
RPL27	0.0157417	-0.149301	0.982	0.968	1
GTPBP6	0.0157706	0.136469	0.203	0.141	1
PRKCSH	0.0158845	-0.208606	0.181	0.239	1
EPHB4	0.0159958	-0.228885	0.216	0.278	1
RBMS2	0.0160889	-0.21985	0.198	0.259	1
EGLN3	0.0161168	-0.112748	0.04	0.084	1
VSIR	0.0161612	0.123007	0.348	0.268	1
RPRD2	0.0161776	0.103943	0.145	0.096	1
NEDD4L	0.0163011	-0.116472	0.018	0.053	1
HAGH	0.0165108	0.104626	0.176	0.122	1
FAM43A	0.0165832	-0.24389	0.145	0.204	1
MT1G	0.0167907	0.160914	0.035	0.015	1
FGL2	0.0168437	-0.319784	0.225	0.276	1
PTGIS	0.0170613	-0.12258	0.04	0.085	1
GNB1	0.0170949	0.104499	0.568	0.487	1
PDLIM7	0.017179	-0.213428	0.084	0.132	1
SGMS2	0.0173188	-0.111555	0.018	0.053	1
EGFL7	0.0173323	-0.237741	0.912	0.889	1
SMIM7	0.0173801	0.119082	0.3	0.226	1
PON2	0.0174222	-0.267596	0.163	0.216	1
CDK11B	0.017548	0.114159	0.242	0.177	1
CFI	0.0175664	-0.28104	0.278	0.328	1
CPT1A	0.017692	-0.204123	0.132	0.191	1
LAMB1	0.0181024	-0.257209	0.115	0.165	1
NHSL2	0.018136	-0.239501	0.141	0.197	1
ATG3	0.0181399	0.111028	0.242	0.174	1
HSPA8	0.0182194	-0.233428	0.7	0.689	1
WDFY3	0.0182827	0.144338	0.097	0.059	1
HMGB3	0.0182856	0.10473	0.066	0.036	1
AGRN	0.0183011	-0.17258	0.053	0.098	1
LIMD2	0.018419	-0.109633	0.022	0.059	1
MIR99AHG	0.0187477	-0.177009	0.035	0.075	1
ERP29	0.0188604	-0.26671	0.507	0.526	1
PDE7B	0.0188719	-0.118116	0.022	0.058	1
ABLIM1	0.0190475	-0.315019	0.392	0.423	1
LARP6	0.0191178	-0.214197	0.079	0.127	1
ACTR3	0.019301	0.114692	0.357	0.28	1
TPST2	0.0193653	-0.229562	0.167	0.228	1
CELF2	0.0194184	-0.286788	0.185	0.235	1
GADD45B	0.0194233	0.181431	0.833	0.761	1
NPM3	0.0195029	-0.100999	0.018	0.052	1
MCL1	0.0196457	0.153964	0.489	0.394	1
ETS1	0.0196909	0.154501	0.595	0.497	1
CARHSP1	0.0197295	-0.264667	0.238	0.3	1
MXRA7	0.0198233	0.150984	0.48	0.397	1
ZNF787	0.0200121	-0.213167	0.11	0.16	1
EIF2S2	0.0201754	-0.3159	0.586	0.581	1
BMP2K	0.0202303	-0.148242	0.044	0.086	1
MAOA	0.0203307	-0.210029	0.097	0.146	1
MRPS25	0.0204736	-0.135494	0.053	0.098	1
RTN2	0.0210942	-0.128073	0.048	0.091	1
C20orf204	0.0210981	-0.12685	0.035	0.075	1
RSPO3	0.0211025	-0.132267	0.018	0.052	1
HOMER3	0.0212793	-0.196136	0.084	0.131	1
MINDY4	0.0213543	-0.134402	0.031	0.068	1
PRRC1	0.0214041	-0.1718	0.066	0.112	1
CDC42EP2	0.0215345	-0.154479	0.079	0.13	1
CDR2	0.0217417	0.106496	0.062	0.034	1
ABLIM3	0.0217659	-0.185633	0.07	0.116	1
AC104794.3	0.0218128	0.119534	0.057	0.03	1
PIEZO1	0.0218536	-0.187838	0.141	0.197	1
BRD2	0.0218847	0.170352	0.432	0.357	1
HDAC7	0.0219941	-0.21764	0.3	0.357	1
NDUFC2	0.022042	0.159061	0.652	0.557	1
LGALS3	0.0223897	-0.198114	0.974	0.966	1
PRXL2B	0.0224122	-0.151706	0.066	0.112	1
TMEM255B	0.0227156	-0.246165	0.225	0.27	1
TMEM65	0.0227622	-0.125142	0.031	0.068	1
ABCG1	0.0227743	-0.19311	0.115	0.166	1
ZNRD1	0.0227784	0.108246	0.22	0.161	1
MYO9A	0.0228991	-0.220785	0.123	0.175	1
NDUFA11	0.0239562	0.146128	0.656	0.544	1
CAMKK1	0.0240333	-0.110161	0.022	0.056	1
SSBP4	0.0240747	0.102833	0.233	0.168	1
PGM5	0.0240978	-0.18423	0.145	0.202	1
AASS	0.0242243	-0.193767	0.075	0.12	1
ABHD16A	0.0242834	-0.112229	0.026	0.063	1
GAB1	0.0242918	-0.166647	0.062	0.106	1
SELENOW	0.0248183	0.200429	0.952	0.922	1
FBL	0.0250141	-0.254938	0.419	0.463	1
BEX2	0.0252594	-0.10562	0.013	0.043	1
EPS8	0.025431	0.113359	0.471	0.387	1
PEAR1	0.025478	-0.210232	0.119	0.168	1
LINC01013	0.0257577	-0.178465	0.053	0.095	1
HID1	0.0257712	-0.126055	0.062	0.105	1
BMERB1	0.0261438	-0.210301	0.11	0.16	1
TMEM173	0.0262	-0.324426	0.445	0.465	1
GNAL	0.0264995	-0.117691	0.031	0.067	1
CARD10	0.0265213	-0.222634	0.123	0.173	1
TPM4	0.0265252	-0.249179	0.731	0.723	1
PXDN	0.0267042	-0.244664	0.115	0.162	1
CDS2	0.0269182	0.130085	0.172	0.122	1
WDFY1	0.0270236	0.102349	0.181	0.13	1
RILPL2	0.0270809	0.117548	0.414	0.344	1
CPAMD8	0.0274058	-0.113613	0.018	0.049	1
IPO8	0.0275189	-0.14671	0.04	0.077	1
ADGRL4	0.0276317	-0.313385	0.683	0.693	1
RALGDS	0.0277665	-0.248451	0.247	0.296	1
CNST	0.0277888	-0.191406	0.079	0.124	1
LAMA4	0.0283563	-0.273242	0.163	0.211	1
FTH1	0.0284029	-0.191225	0.978	0.98	1
INF2	0.0284836	-0.12582	0.07	0.116	1
LHFPL6	0.0285001	-0.283555	0.37	0.408	1
COG1	0.0285584	-0.112144	0.018	0.048	1
SAP18	0.0285911	0.105828	0.652	0.552	1
CLSTN3	0.0288148	-0.140529	0.035	0.072	1
SRRM1	0.0289496	0.149252	0.7	0.604	1
CELSR1	0.0291861	-0.111191	0.026	0.061	1
CBR3	0.0291955	-0.163138	0.15	0.203	1
FLRT2	0.0293066	-0.111901	0.022	0.054	1
TM4SF18	0.0296302	-0.285678	0.282	0.322	1
TMEM91	0.0297844	-0.153318	0.048	0.088	1
MYH10	0.0300164	-0.121881	0.057	0.101	1
SERF2	0.0300805	-0.194092	0.952	0.927	1
SLCO2B1	0.0303429	-0.149306	0.035	0.071	1
GPX4	0.0304659	0.106366	0.753	0.646	1
NDRG2	0.0307437	-0.163847	0.084	0.13	1
SNX14	0.0312155	-0.139076	0.048	0.088	1
SPCS3	0.0314498	-0.265979	0.374	0.406	1
PHKG2	0.0315904	0.114758	0.07	0.042	1
COX5B	0.0318003	0.123848	0.775	0.683	1
PKP4	0.0319184	-0.257351	0.278	0.326	1
SNRPB	0.0321496	0.121616	0.573	0.482	1
SPSB1	0.0325172	-0.104444	0.018	0.047	1
FAM89B	0.0325505	-0.251621	0.207	0.251	1
BHLHE41	0.032848	-0.190679	0.057	0.098	1
VAMP2	0.0332244	-0.271598	0.419	0.448	1
TXNRD2	0.0333292	-0.120025	0.035	0.071	1
MCF2L	0.0335922	-0.253617	0.137	0.181	1
CD99	0.0337949	-0.188138	0.885	0.882	1
PPP1R14B	0.0344214	-0.22997	0.502	0.552	1
CASP10	0.0346321	0.158945	0.163	0.117	1
UBE2V1	0.0347329	-0.251832	0.485	0.493	1
HRCT1	0.0353132	-0.273078	0.154	0.2	1
TMBIM4	0.0353247	-0.270153	0.577	0.568	1
NDUFA5	0.0357836	0.122804	0.357	0.283	1
ZNF467	0.0359841	-0.165099	0.066	0.106	1
PHIP	0.0360396	-0.175448	0.176	0.228	1
ANXA4	0.0360585	-0.216555	0.211	0.262	1
PELI2	0.0363645	-0.12576	0.044	0.082	1
ASPH	0.0367103	-0.278119	0.282	0.319	1
MPV17	0.0370585	0.122236	0.132	0.091	1
LMCD1	0.0376761	-0.244524	0.626	0.645	1
DNM3	0.0389913	-0.10473	0.044	0.082	1
ELN	0.0390021	-0.264171	0.145	0.189	1
L1CAM	0.0391305	-0.181675	0.07	0.111	1
SRI	0.0399234	0.144993	0.419	0.337	1
ATP5PD	0.0400069	0.130208	0.533	0.461	1
AL359220.1	0.0401978	-0.145982	0.048	0.085	1
ATP6V1E1	0.0402258	0.108433	0.322	0.248	1
PHACTR2	0.0403729	-0.308554	0.405	0.431	1
HOXB7	0.0403964	0.120242	0.379	0.293	1
BIRC3	0.0404568	-0.220712	0.084	0.126	1
COX6B1	0.0407733	0.113259	0.705	0.622	1
IL33	0.0412141	-0.237153	0.507	0.551	1
SLC35E4	0.0414438	-0.176844	0.084	0.126	1
EHD1	0.0414884	-0.107795	0.035	0.069	1
FZD4	0.0417693	-0.203509	0.101	0.144	1
FBXO25	0.0417924	-0.184723	0.106	0.149	1
MAGI1	0.0418513	-0.225269	0.26	0.312	1
KIF16B	0.0418732	0.104608	0.093	0.06	1
PROX1	0.0419165	-0.183845	0.106	0.151	1
ZBTB8A	0.0419809	-0.18351	0.088	0.131	1
RALGAPA2	0.0425886	-0.18002	0.176	0.227	1
IL13RA1	0.0426355	-0.235209	0.159	0.204	1
KRT8	0.0427433	-0.179992	0.145	0.193	1
NR5A2	0.0434787	-0.145	0.07	0.111	1
HSD3B7	0.0437796	-0.101627	0.035	0.069	1
SCRIB	0.043933	0.11892	0.057	0.033	1
RASSF9	0.0442071	-0.216208	0.141	0.187	1
HRH1	0.0444444	-0.187315	0.128	0.173	1
SLC8A1	0.0446147	-0.113263	0.026	0.057	1
LRG1	0.0448443	-0.173344	0.026	0.057	1
ITSN1	0.045177	-0.12396	0.044	0.079	1
ETS2	0.0456031	-0.249535	0.63	0.621	1
ARHGAP1	0.0460164	-0.117858	0.062	0.101	1
MT-ATP8	0.0461811	-0.298073	0.247	0.288	1
MEDAG	0.0470483	-0.12422	0.031	0.062	1
TMEM43	0.0472088	-0.227543	0.247	0.287	1
PDK4	0.0476159	-0.225815	0.093	0.133	1
RPS4Y1	0.0478683	-0.259185	0.815	0.796	1
EBF1	0.0478755	-0.203622	0.432	0.454	1
PPP1R16A	0.0487432	-0.107783	0.026	0.056	1
ATF4	0.0492424	-0.200974	0.485	0.522	1
RECQL	0.0493771	-0.213097	0.203	0.249	1
SREK1IP1	0.0495954	0.178997	0.322	0.256	1
SULT1C4	0.0496311	-0.115871	0.031	0.062	1
CYSLTR1	0.0498796	-0.142676	0.035	0.066	1
MAP1LC3B	0.0500837	-0.186998	0.524	0.559	1
PPP5C	0.05053	-0.204677	0.132	0.172	1
SLFN5	0.0519131	0.121549	0.432	0.358	1
ESYT2	0.0523031	-0.263454	0.176	0.215	1
BZW2	0.0523769	-0.199796	0.141	0.184	1
CRYL1	0.0531732	-0.108713	0.062	0.101	1
AKAP12	0.0545202	-0.182021	0.119	0.165	1
TNRC6B	0.0552273	-0.173129	0.401	0.425	1
ODF2L	0.0556481	-0.24471	0.203	0.241	1
NUP50	0.055994	-0.183589	0.079	0.116	1
ATP5F1E	0.0561315	-0.188288	0.974	0.955	1
HLA-DRB1	0.056255	-0.255624	0.921	0.925	1
ELOVL7	0.056782	-0.263971	0.181	0.218	1
LRP10	0.0577286	-0.243557	0.304	0.334	1
ULK3	0.0579172	-0.103439	0.031	0.06	1
MIGA1	0.0581006	-0.207108	0.088	0.126	1
MEGF6	0.0583166	-0.176032	0.101	0.142	1
PLAT	0.0585404	-0.225221	0.203	0.25	1
ACTB	0.0585842	0.160199	0.982	0.955	1
CARD19	0.0590591	-0.132468	0.238	0.288	1
SNED1	0.0590848	-0.124525	0.057	0.093	1
ZNRF3	0.0601143	-0.121205	0.04	0.07	1
MCUR1	0.0605133	-0.244962	0.159	0.196	1
SPTBN1	0.0606539	-0.263693	0.758	0.733	1
MAD2L2	0.0608783	-0.100558	0.079	0.119	1
CALM2	0.0609134	-0.208923	0.802	0.778	1
YWHAZ	0.0612783	-0.248168	0.524	0.53	1
HLA-DPB1	0.0627289	-0.329579	0.63	0.63	1
PRKAR1B	0.0642694	-0.142727	0.088	0.124	1
DSG2	0.0644951	-0.102371	0.031	0.059	1
TAF15	0.0648208	-0.225587	0.238	0.277	1
NRN1	0.0658399	-0.315962	0.564	0.556	1
DDX17	0.0659884	-0.309019	0.48	0.493	1
STARD3	0.0674694	-0.205109	0.211	0.246	1
SSBP1	0.0691655	0.11487	0.546	0.455	1
TIMM10	0.0698005	-0.186085	0.159	0.199	1
DYNC1LI2	0.0699725	0.122175	0.432	0.358	1
EDN1	0.0701885	0.425334	0.643	0.557	1
NADK	0.0708386	-0.113202	0.044	0.075	1
STAB1	0.0712059	-0.151335	0.101	0.141	1
CADPS2	0.0716979	-0.18206	0.093	0.127	1
KLF7	0.0721431	-0.209396	0.167	0.205	1
OGT	0.0721775	-0.147566	0.057	0.09	1
INPP1	0.0724064	-0.241479	0.181	0.215	1
TCP11L2	0.0728645	-0.138562	0.106	0.143	1
ACAA2	0.0730386	-0.116482	0.053	0.085	1
CRTAP	0.0735427	-0.214377	0.392	0.412	1
SIK2	0.0745005	-0.138798	0.062	0.094	1
SLC35E1	0.0746845	-0.114797	0.053	0.085	1
CAPNS1	0.0750291	-0.17378	0.648	0.636	1
CISD1	0.0752888	-0.176913	0.101	0.138	1
MRPL32	0.076094	-0.170859	0.145	0.186	1
POSTN	0.0764871	-0.289857	0.159	0.207	1
ST13	0.0766835	-0.166365	0.718	0.687	1
ZNF706	0.0767581	-0.258481	0.427	0.449	1
GPM6A	0.0769305	-0.116484	0.031	0.058	1
UCHL5	0.0769764	0.122262	0.123	0.089	1
BAG5	0.0778854	-0.218732	0.207	0.245	1
POLDIP2	0.0779801	0.105597	0.11	0.079	1
ZNF32	0.0780634	0.113577	0.141	0.104	1
TNRC18	0.0781927	-0.151103	0.048	0.077	1
CAMTA1	0.0797837	-0.210391	0.273	0.308	1
MSRB3	0.080226	-0.214149	0.33	0.368	1
RBMS1	0.0803639	-0.249508	0.286	0.316	1
LDHB	0.0803716	-0.214204	0.194	0.228	1
GFOD2	0.0804002	-0.195337	0.15	0.187	1
GRASP	0.0807489	-0.292259	0.542	0.541	1
VAT1	0.0818454	-0.205441	0.26	0.293	1
TMX3	0.0818859	-0.15982	0.101	0.138	1
TTC14	0.0820695	-0.101507	0.057	0.089	1
MAP3K3	0.0825123	-0.198824	0.194	0.232	1
ECE1	0.082521	-0.252463	0.568	0.58	1
TMOD2	0.0827058	-0.155134	0.062	0.093	1
PIGS	0.0827446	-0.10697	0.04	0.068	1
SEPTIN8	0.0835651	-0.113742	0.035	0.062	1
FOXO1	0.0841778	-0.218813	0.22	0.257	1
LYRM1	0.0841784	-0.170448	0.079	0.112	1
NBDY	0.0851335	-0.169931	0.26	0.295	1
KIAA0319L	0.0859384	-0.127928	0.101	0.138	1
ITPR1	0.0862698	-0.184559	0.128	0.163	1
SMARCC2	0.0868986	-0.100314	0.181	0.22	1
FAM3A	0.0873572	-0.11239	0.048	0.078	1
FKBP5	0.0879021	-0.147735	0.088	0.123	1
OSBP	0.087937	-0.155869	0.079	0.111	1
CMC1	0.0881039	-0.156149	0.084	0.116	1
MCAM	0.0882543	-0.184148	0.282	0.32	1
BCL3	0.088404	-0.248688	0.198	0.233	1
TIE1	0.0891469	0.110545	0.392	0.329	1
RERE	0.0892199	-0.276966	0.256	0.282	1
ATRAID	0.089857	-0.22754	0.348	0.374	1
MRTFB	0.0901571	-0.280084	0.463	0.483	1
PPP1CC	0.0902031	-0.149113	0.207	0.248	1
CPXM2	0.0914494	-0.1896	0.137	0.172	1
FBN1	0.0916282	-0.180004	0.097	0.132	1
NT5C3B	0.0925562	-0.128246	0.101	0.138	1
TPD52	0.0926383	-0.181195	0.137	0.17	1
RPL8	0.0927628	-0.127569	1	0.998	1
CXCL9	0.0927805	-0.597435	0	0.012	1
URGCP	0.0928231	-0.103456	0.035	0.062	1
FAM118A	0.094176	-0.20157	0.119	0.15	1
PSME1	0.094563	0.133731	0.784	0.719	1
HADHA	0.0946037	-0.256606	0.423	0.44	1
TMEM39B	0.0949798	-0.121733	0.053	0.082	1
NNT-AS1	0.0952981	-0.118172	0.053	0.083	1
BCAR1	0.095442	-0.175852	0.119	0.154	1
SNHG8	0.0962325	-0.214895	0.722	0.702	1
PSMA7	0.0968827	0.160082	0.806	0.74	1
PMAIP1	0.0971043	-0.12848	0.044	0.072	1
TMEM14C	0.0973543	-0.233566	0.449	0.456	1
BEX5	0.0981123	0.141811	0.088	0.061	1
TNFRSF14	0.0987669	-0.216927	0.278	0.309	1
GLOD4	0.0989238	-0.143627	0.154	0.193	1
AKT3	0.0989887	-0.194393	0.216	0.248	1
ETHE1	0.0993854	-0.179235	0.154	0.188	1
MKNK2	0.0996894	-0.202002	0.141	0.173	1
MFSD14A	0.100748	-0.152036	0.084	0.115	1
ITGA5	0.100826	-0.219777	0.339	0.367	1
ZC3H13	0.100869	0.119106	0.458	0.39	1
NKTR	0.102364	-0.247238	0.401	0.418	1
RAB29	0.102953	-0.146182	0.07	0.101	1
MFNG	0.104236	-0.198321	0.194	0.23	1
RAD18	0.104835	0.129896	0.04	0.023	1
SMAD9	0.104868	-0.153817	0.093	0.124	1
CRIM1-DT	0.105075	-0.100708	0.04	0.066	1
CDK6	0.106704	-0.109152	0.048	0.077	1
YBX1	0.106794	-0.142383	0.952	0.916	1
PLEKHO2	0.106828	-0.119643	0.057	0.086	1
PROS1	0.108568	-0.273146	0.247	0.267	1
RTN3	0.109118	-0.223627	0.282	0.3	1
AVPR2	0.109474	-0.227954	0.225	0.257	1
ZNF267	0.110266	-0.131385	0.066	0.096	1
PCBP2	0.110471	-0.182448	0.678	0.658	1
HAUS1	0.110906	-0.135985	0.075	0.105	1
ARHGAP12	0.111354	-0.10759	0.035	0.059	1
ZNF667-AS1	0.111736	-0.142412	0.11	0.144	1
MACF1	0.112421	-0.22852	0.502	0.514	1
MBD3	0.11257	-0.132302	0.07	0.1	1
HYI	0.112636	-0.138587	0.088	0.12	1
LY96	0.114435	-0.187691	0.141	0.171	1
LAMA3	0.114674	-0.131914	0.053	0.079	1
PPP1R18	0.114881	-0.18191	0.189	0.225	1
SLC16A7	0.114967	-0.163557	0.088	0.116	1
CALCOCO2	0.114992	-0.247194	0.405	0.408	1
NUFIP1	0.115049	0.131648	0.093	0.067	1
GIMAP2	0.115544	-0.151492	0.11	0.144	1
PCYOX1	0.116363	-0.179835	0.15	0.182	1
SLC43A3	0.116705	-0.142421	0.088	0.117	1
LPGAT1	0.116981	-0.126262	0.123	0.158	1
TSPAN9	0.117099	-0.138345	0.15	0.186	1
SHC1	0.117706	-0.111483	0.229	0.259	1
ATP5F1D	0.117841	-0.274021	0.652	0.596	1
LINC-PINT	0.11786	-0.176527	0.119	0.153	1
LAPTM4B	0.118808	-0.199183	0.15	0.181	1
TMEM205	0.119629	-0.198596	0.233	0.263	1
DEK	0.120238	-0.268718	0.727	0.679	1
LY6E	0.120386	-0.118648	0.806	0.778	1
PLSCR1	0.120431	-0.253508	0.454	0.454	1
COPRS	0.123808	-0.146408	0.194	0.228	1
FRMD3	0.124581	-0.129173	0.053	0.078	1
APTX	0.124658	-0.125305	0.053	0.079	1
CYTH1	0.125435	-0.231937	0.211	0.241	1
MAPRE2	0.126363	-0.102358	0.057	0.085	1
NUDCD1	0.126594	-0.189174	0.11	0.138	1
GIMAP6	0.127135	-0.154563	0.401	0.418	1
RAB6A	0.12739	-0.17503	0.194	0.228	1
CDC42SE2	0.127476	-0.192711	0.176	0.205	1
DYNC1H1	0.127527	-0.216595	0.33	0.361	1
OST4	0.127906	-0.19784	0.652	0.652	1
ELP2	0.132041	-0.153412	0.066	0.091	1
FOXC1	0.132182	-0.221653	0.291	0.316	1
WDR6	0.132287	-0.104742	0.04	0.063	1
NSA2	0.136703	-0.214078	0.604	0.611	1
DPY19L4	0.136763	-0.123775	0.062	0.088	1
BRIX1	0.13706	-0.119993	0.119	0.152	1
TXN	0.1383	-0.187635	0.705	0.694	1
ACIN1	0.138317	-0.142821	0.15	0.185	1
HAX1	0.139219	-0.130441	0.211	0.241	1
SF1	0.139389	-0.208421	0.361	0.381	1
UBL3	0.139866	-0.158549	0.167	0.2	1
PPP2R5A	0.140695	-0.190869	0.189	0.218	1
POLR2J3	0.142038	-0.172543	0.093	0.121	1
UPF3A	0.143753	0.106551	0.436	0.379	1
HSD17B11	0.143882	-0.235978	0.423	0.429	1
UQCRB	0.144975	-0.16286	0.894	0.871	1
PQBP1	0.146164	-0.17239	0.189	0.22	1
PPCS	0.146385	-0.194462	0.282	0.308	1
BAZ1A	0.146481	-0.200177	0.167	0.196	1
IP6K1	0.146483	-0.107811	0.053	0.078	1
ARRDC2	0.146671	-0.162937	0.176	0.205	1
PPP4R1	0.146901	-0.183001	0.106	0.132	1
WNK1	0.147534	-0.18642	0.507	0.493	1
EIF3M	0.147816	-0.192248	0.322	0.343	1
FAM3C	0.148688	-0.180546	0.181	0.211	1
CDC42EP4	0.149168	-0.189067	0.137	0.163	1
CPQ	0.150907	-0.176804	0.123	0.151	1
IGBP1	0.151244	-0.174812	0.251	0.278	1
TXNDC5	0.151413	-0.129008	0.163	0.196	1
SUMO3	0.151664	-0.220216	0.317	0.339	1
CCND3	0.152936	-0.11807	0.3	0.327	1
ST6GAL1	0.152946	-0.207671	0.22	0.245	1
DNASE2	0.154138	-0.14256	0.119	0.147	1
CLSTN1	0.154171	-0.189031	0.141	0.169	1
ERCC4	0.154705	-0.103985	0.035	0.056	1
CRTC3	0.155453	-0.110392	0.048	0.071	1
CCNL2	0.157045	-0.143415	0.128	0.158	1
TXNDC12	0.157076	-0.141932	0.242	0.272	1
WDR74	0.157334	-0.269879	0.286	0.301	1
PIK3IP1	0.157397	-0.18928	0.211	0.24	1
ZMIZ1	0.159257	-0.146999	0.22	0.252	1
UBE2R2	0.160229	-0.171292	0.264	0.289	1
FNIP2	0.160472	-0.208865	0.172	0.197	1
STX4	0.160589	-0.170765	0.132	0.159	1
MGAT4A	0.162007	-0.184227	0.141	0.166	1
GALNT11	0.162115	-0.150657	0.101	0.128	1
RPL4	0.162617	-0.136523	0.925	0.88	1
EGLN2	0.163057	-0.206205	0.233	0.26	1
WDR73	0.163287	-0.116337	0.048	0.071	1
EIF4E3	0.165384	-0.106861	0.088	0.116	1
PPP3CA	0.165939	-0.170832	0.48	0.482	1
HSPA9	0.166879	-0.192811	0.216	0.241	1
SRFBP1	0.166948	-0.12571	0.119	0.15	1
CRACR2B	0.168087	-0.137003	0.159	0.189	1
GNB4	0.168365	-0.163206	0.132	0.159	1
SOD1	0.168418	-0.18811	0.59	0.587	1
CCDC186	0.169036	-0.188036	0.216	0.244	1
FABP4	0.170214	0.232966	0.062	0.043	1
SOGA1	0.171336	-0.12712	0.079	0.104	1
CUL5	0.171409	-0.169544	0.123	0.151	1
RAPGEF3	0.171563	-0.146376	0.247	0.281	1
CLIC2	0.17165	-0.186543	0.242	0.266	1
CXCL11	0.17181	-0.110896	0.004	0.016	1
CAT	0.173226	-0.126355	0.066	0.09	1
G0S2	0.174087	-0.239344	0.009	0.022	1
RWDD1	0.174174	-0.294473	0.476	0.459	1
ST6GALNAC6	0.174409	-0.139832	0.141	0.172	1
MAPKAPK2	0.17474	-0.122126	0.075	0.1	1
BEX4	0.175591	-0.147423	0.093	0.118	1
MGST2	0.175795	-0.236468	0.674	0.632	1
CENPX	0.175915	-0.164222	0.238	0.26	1
IFNAR1	0.17608	0.110566	0.322	0.255	1
LRRC32	0.176498	-0.14478	0.225	0.255	1
GOPC	0.177119	-0.195148	0.176	0.199	1
SNRK	0.178004	-0.181772	0.273	0.299	1
AC100810.1	0.178046	-0.101161	0.053	0.075	1
NANS	0.178077	-0.135472	0.128	0.155	1
MAPK1	0.178274	-0.131881	0.101	0.129	1
BRD1	0.178699	0.115949	0.145	0.116	1
IST1	0.178931	-0.184508	0.154	0.178	1
RPS19BP1	0.17926	-0.200739	0.313	0.332	1
KRT18	0.17934	-0.156204	0.194	0.222	1
RARA	0.181107	-0.146829	0.101	0.126	1
EIF3I	0.181154	-0.197908	0.396	0.389	1
ANKRD12	0.181316	-0.260708	0.599	0.564	1
PCDH17	0.181645	-0.14687	0.066	0.089	1
CCDC127	0.182557	-0.100756	0.048	0.07	1
ZNF431	0.183285	-0.111031	0.044	0.065	1
EIF3L	0.183349	-0.195535	0.449	0.441	1
TTC3	0.184402	-0.204283	0.229	0.251	1
MAP4K5	0.184494	-0.133657	0.115	0.141	1
NECAP2	0.185022	-0.162063	0.137	0.161	1
GON4L	0.18539	-0.134162	0.115	0.143	1
ARSD	0.185704	-0.11425	0.07	0.095	1
ZFP36L1	0.186936	-0.146188	0.736	0.741	1
NASP	0.187603	-0.191786	0.586	0.57	1
DYNLL2	0.18859	-0.193394	0.172	0.195	1
CCDC50	0.190061	-0.219811	0.493	0.487	1
VDAC3	0.191154	-0.128089	0.207	0.238	1
GSS	0.192295	-0.108162	0.048	0.068	1
SNX5	0.192778	-0.138881	0.128	0.153	1
ARPC1B	0.19298	-0.131145	0.744	0.719	1
MRPS18B	0.193358	-0.212547	0.256	0.273	1
MYCBP2	0.194331	-0.194968	0.388	0.414	1
SLC66A2	0.194793	-0.149916	0.154	0.179	1
FAM107B	0.195541	-0.167321	0.141	0.166	1
IGF2R	0.198439	-0.131133	0.079	0.103	1
NDEL1	0.199502	-0.116513	0.07	0.094	1
TOMM7	0.201201	-0.119087	0.907	0.871	1
BX284668.5	0.201513	-0.117018	0.075	0.098	1
DBN1	0.201679	-0.12184	0.079	0.104	1
FABP5	0.203706	-0.113801	0.489	0.514	1
INO80C	0.204037	-0.114068	0.084	0.108	1
AHNAK2	0.204566	-0.18686	0.194	0.217	1
ZNF622	0.205525	-0.113522	0.097	0.123	1
TUT4	0.206085	-0.143154	0.181	0.212	1
FZD6	0.206318	-0.133194	0.189	0.216	1
RNF126	0.206628	-0.142186	0.128	0.154	1
M6PR	0.206862	-0.187814	0.141	0.162	1
LPP	0.20703	-0.202975	0.203	0.221	1
SLC25A37	0.207779	-0.168954	0.128	0.152	1
TMEM107	0.209662	-0.159844	0.137	0.161	1
PUS7L	0.209894	-0.110871	0.097	0.122	1
PKM	0.211763	-0.204858	0.537	0.524	1
HSF1	0.211926	-0.128241	0.137	0.161	1
LCOR	0.214935	-0.11954	0.066	0.087	1
CCN2	0.217533	-0.206948	0.815	0.798	1
SLC25A3	0.217603	-0.126549	0.714	0.668	1
DYNLRB1	0.218039	-0.219398	0.639	0.597	1
CTSA	0.21804	-0.165938	0.247	0.266	1
XIAP	0.218402	-0.136531	0.15	0.175	1
GYPC	0.221234	-0.104597	0.176	0.207	1
PYCARD	0.22137	-0.160409	0.154	0.176	1
SERINC1	0.221496	-0.167898	0.52	0.503	1
JDP2	0.221942	-0.10231	0.079	0.102	1
RCN1	0.224911	-0.169814	0.388	0.384	1
APOL6	0.225561	-0.121657	0.07	0.092	1
DPM1	0.226824	-0.119679	0.093	0.115	1
AKR1A1	0.227348	-0.163227	0.242	0.265	1
RPS27L	0.229494	-0.193314	0.555	0.558	1
PXN	0.229607	-0.184262	0.198	0.22	1
PTGES3	0.229821	-0.21972	0.617	0.598	1
NDUFA1	0.230109	-0.162578	0.555	0.559	1
HINT1	0.230492	-0.15858	0.802	0.796	1
PDCL	0.230822	-0.103097	0.132	0.157	1
AC008555.4	0.230835	-0.101435	0.053	0.072	1
SAT2	0.232847	-0.166921	0.26	0.277	1
MCUB	0.234491	-0.19932	0.242	0.258	1
MED15	0.234552	-0.101664	0.084	0.107	1
BGN	0.234779	0.15574	0.044	0.031	1
DNAJC18	0.235642	-0.115442	0.084	0.106	1
ADSS	0.236734	-0.133173	0.22	0.241	1
RHOJ	0.237672	-0.176695	0.198	0.22	1
ARL6IP4	0.237843	0.169645	0.683	0.616	1
NPDC1	0.238281	-0.130721	0.85	0.811	1
EXOSC10	0.238581	-0.110634	0.062	0.081	1
ATP5MC1	0.239028	-0.182501	0.357	0.363	1
PABPC4	0.239955	-0.220931	0.225	0.241	1
ST3GAL1	0.240239	-0.14288	0.079	0.098	1
SLC12A6	0.240302	-0.1142	0.079	0.102	1
DHRS7	0.240327	-0.226049	0.449	0.431	1
LAMA5	0.240356	-0.178907	0.216	0.237	1
SYCE1L	0.246237	-0.115087	0.066	0.087	1
MT1M	0.246547	-0.340988	0.093	0.071	1
SMAGP	0.247745	-0.100705	0.115	0.14	1
PRDX1	0.248248	-0.125296	0.806	0.79	1
EIF4A1	0.253011	-0.164014	0.837	0.769	1
EIF4B	0.253839	-0.173923	0.621	0.589	1
RHOA	0.25601	0.113305	0.819	0.756	1
ENSA	0.256385	-0.215298	0.423	0.409	1
DDOST	0.256999	-0.205933	0.242	0.25	1
MYRIP	0.258126	-0.194197	0.185	0.202	1
BCAM	0.258295	-0.197869	0.731	0.717	1
SNRPF	0.25899	-0.192532	0.52	0.508	1
ARFGEF1	0.259496	-0.135335	0.093	0.112	1
FBXO31	0.261	-0.137365	0.115	0.136	1
GLS	0.262065	-0.250641	0.3	0.297	1
C6orf89	0.262505	-0.16222	0.128	0.148	1
USP36	0.263139	-0.124094	0.097	0.118	1
NEDD8	0.265629	-0.188315	0.626	0.597	1
FUT11	0.266177	-0.106345	0.066	0.085	1
TTC19	0.268323	-0.12543	0.189	0.21	1
ANXA1	0.271238	-0.212542	0.767	0.76	1
SYNGR2	0.271334	-0.204778	0.502	0.482	1
MALL	0.271381	-0.219674	0.326	0.323	1
DSTN	0.271917	-0.116218	0.956	0.945	1
PLAC9	0.273229	-0.203197	0.256	0.274	1
BICD2	0.273726	-0.111021	0.062	0.08	1
CGGBP1	0.273986	-0.116587	0.225	0.249	1
PPP1R35	0.274061	-0.158408	0.115	0.134	1
PIK3CA	0.278939	-0.166638	0.106	0.123	1
TAF1D	0.279882	-0.207646	0.357	0.359	1
ADM5	0.280971	-0.101984	0.295	0.241	1
GSN	0.282052	-0.137692	0.93	0.901	1
TM9SF3	0.282352	-0.18447	0.401	0.391	1
AUP1	0.282448	-0.172165	0.172	0.188	1
EEF2K	0.283234	-0.112311	0.163	0.185	1
UGP2	0.284124	-0.216381	0.335	0.337	1
ATXN3	0.284903	-0.121079	0.172	0.196	1
ERG28	0.285273	-0.116057	0.079	0.097	1
RPN1	0.285433	-0.165431	0.176	0.193	1
NBEAL1	0.285997	-0.109743	0.145	0.169	1
TRIB1	0.287101	-0.284333	0.233	0.24	1
BTF3	0.287681	-0.109173	0.947	0.917	1
ITGB1BP1	0.287701	-0.164196	0.304	0.313	1
LAMB2	0.287754	-0.196937	0.286	0.298	1
EGLN1	0.288798	-0.209432	0.269	0.28	1
GNB5	0.289881	-0.103426	0.053	0.069	1
EZR	0.291299	-0.117356	0.22	0.24	1
TMEM134	0.291612	-0.130572	0.159	0.179	1
RGS16	0.291812	-0.752143	0.282	0.287	1
TERF1	0.29222	-0.145849	0.132	0.152	1
SYNE3	0.292586	-0.140472	0.101	0.12	1
ARHGAP21	0.293515	-0.140457	0.145	0.165	1
RSL1D1	0.29448	-0.175699	0.405	0.4	1
ZNF644	0.294783	-0.181069	0.207	0.223	1
RBM5	0.295861	-0.114888	0.167	0.185	1
FARP1	0.298186	-0.116887	0.093	0.111	1
CLPTM1	0.300236	-0.141411	0.119	0.139	1
ABRAXAS1	0.30047	-0.137222	0.106	0.124	1
CTDNEP1	0.30059	-0.137731	0.163	0.182	1
CCNT1	0.30093	-0.113903	0.053	0.068	1
PPIA	0.300969	-0.101881	0.96	0.913	1
ACYP1	0.301536	-0.109653	0.097	0.116	1
TXNDC9	0.302085	-0.103269	0.137	0.156	1
AKAP17A	0.305484	-0.149388	0.101	0.118	1
C11orf96	0.306206	-0.14509	0.097	0.119	1
SIK3	0.306631	-0.104432	0.062	0.078	1
PGRMC1	0.307836	-0.133644	0.256	0.268	1
DHX9	0.311262	-0.14132	0.15	0.169	1
FMNL2	0.313776	-0.11795	0.084	0.101	1
GAK	0.316988	-0.100314	0.084	0.101	1
ARRB1	0.318473	-0.129745	0.119	0.138	1
RTN4	0.320123	-0.161667	0.621	0.591	1
SHANK3	0.321596	-0.12804	0.141	0.16	1
EMC7	0.321784	-0.136646	0.198	0.213	1
SLC44A1	0.321881	-0.123949	0.137	0.158	1
AGPAT2	0.322668	-0.161395	0.229	0.245	1
REV3L	0.323817	-0.142856	0.167	0.188	1
TMEM192	0.324798	-0.123322	0.084	0.099	1
METAP2	0.327292	-0.144975	0.537	0.528	1
EIF2S3	0.327623	-0.176953	0.308	0.322	1
EPB41L4A	0.328673	-0.111894	0.123	0.143	1
IFI16	0.328794	-0.178904	0.744	0.705	1
C5orf24	0.330497	-0.192235	0.26	0.272	1
SNHG16	0.330545	-0.172046	0.432	0.416	1
G6PD	0.331123	-0.105241	0.048	0.062	1
SLC29A1	0.331721	-0.154933	0.159	0.173	1
PMEPA1	0.332075	-0.119891	0.075	0.091	1
PGF	0.333672	-0.119133	0.088	0.106	1
ADAM10	0.336045	-0.162512	0.238	0.253	1
ZNF720	0.336091	-0.110457	0.062	0.076	1
CTDSP2	0.336093	-0.150922	0.194	0.21	1
CDYL	0.337099	-0.12129	0.154	0.174	1
C12orf76	0.338619	-0.124273	0.097	0.113	1
N4BP2L2	0.338668	-0.207738	0.559	0.538	1
DIAPH1	0.339229	-0.151829	0.207	0.223	1
NPEPPS	0.340166	-0.12292	0.128	0.146	1
AKAP9	0.340306	-0.223409	0.48	0.472	1
NDUFB5	0.342265	-0.135289	0.22	0.242	1
GPBP1L1	0.34275	-0.132798	0.154	0.171	1
PPFIBP1	0.343183	-0.105852	0.423	0.356	1
TUBB6	0.34572	-0.192979	0.269	0.273	1
NCK1	0.34631	-0.135019	0.256	0.268	1
SPAG7	0.347193	-0.150458	0.22	0.234	1
IMP3	0.347374	-0.199139	0.374	0.373	1
AC018521.5	0.347421	-0.113458	0.066	0.08	1
TMED10	0.34777	-0.149302	0.317	0.321	1
BCLAF1	0.350338	-0.184774	0.414	0.411	1
MIS18BP1	0.35123	-0.117382	0.15	0.169	1
FTX	0.352078	-0.197106	0.189	0.202	1
NRBP1	0.353241	-0.148186	0.203	0.214	1
DKK3	0.35541	-0.185573	0.141	0.157	1
[truncated: 401 more rows]

## Sheet: Capillary
Symbol	p_val	avg_log2FC	pct.1	pct.2	p_val_adj
CLU	0	-2.66243	0.871	0.991	0
ACKR1	6.06352e-238	-2.15871	0.716	0.945	2.21931e-233
RGCC	2.93873e-207	1.04938	0.284	0.031	1.07561e-202
ITIH5	3.71946e-163	1.39606	0.509	0.154	1.36136e-158
A2M	3.8764e-155	1.20004	0.95	0.719	1.4188e-150
ADIRF	2.95523e-133	-1.01954	0.965	0.995	1.08164e-128
TMSB4X	1.33019e-130	-0.750012	1	1	4.86862e-126
CCL14	9.8188e-125	-1.36658	0.952	0.974	3.59378e-120
RPL34	2.10229e-123	-0.668047	1	1	7.69458e-119
RCAN2	6.89466e-123	0.528417	0.212	0.03	2.52351e-118
RPS14	2.89215e-121	-0.684746	0.999	1	1.05856e-116
ADGRF5	7.10606e-112	1.01567	0.608	0.276	2.60089e-107
RPL37	7.07307e-104	-0.626479	0.998	1	2.58881e-99
S100A6	1.16774e-103	-0.694838	1	1	4.27404e-99
TPT1	9.32295e-100	-0.613518	1	1	3.41229e-95
TSC22D1	5.01701e-98	1.33114	0.71	0.442	1.83627e-93
SPARC	7.84414e-94	1.09622	0.9	0.75	2.87104e-89
RPL13	4.20241e-93	-0.573401	1	1	1.53812e-88
RPS18	8.58446e-93	-0.613082	0.999	1	3.142e-88
RBP7	1.1682e-91	1.49365	0.544	0.269	4.27573e-87
RPL32	1.60783e-90	-0.612361	0.999	0.999	5.88484e-86
SPRY1	2.37442e-88	1.21969	0.615	0.327	8.69062e-84
PERP	1.3499e-80	-1.12388	0.167	0.498	4.94078e-76
RPS23	4.4087e-80	-0.546348	0.999	0.999	1.61363e-75
RPL10	1.6627e-79	-0.547665	1	1	6.08565e-75
ITM2B	4.63726e-75	-0.64286	0.991	0.996	1.69728e-70
BTNL9	3.7237e-74	0.412442	0.157	0.028	1.36291e-69
RPL30	9.60272e-74	-0.521525	0.995	0.999	3.51469e-69
RPS21	4.51945e-73	-0.562244	0.994	0.997	1.65417e-68
NR2F2	4.53877e-70	-1.01197	0.323	0.61	1.66124e-65
DAAM1	2.00337e-67	-0.944223	0.33	0.608	7.33252e-63
RPL39	4.00546e-67	-0.547217	0.995	0.998	1.46604e-62
RPS27	4.75868e-67	-0.454551	0.999	1	1.74172e-62
GSN	6.82303e-67	0.743445	0.956	0.896	2.4973e-62
GNG11	1.08419e-66	0.61372	0.994	0.98	3.96823e-62
S100A10	2.4434e-65	-0.6287	0.973	0.991	8.94307e-61
RFLNB	2.497e-64	0.593921	0.247	0.075	9.13928e-60
NOTCH4	4.96248e-64	0.563925	0.288	0.097	1.81632e-59
RPS29	1.01187e-63	-0.478999	0.999	0.998	3.70356e-59
RPL12	2.79728e-63	-0.54275	0.997	0.998	1.02383e-58
MMRN1	3.48519e-62	-1.01067	0.374	0.63	1.27561e-57
RPL35	5.3274e-62	-0.508406	0.984	0.995	1.94988e-57
SLC14A1	1.03515e-61	0.380463	0.094	0.011	3.78877e-57
RPS15A	1.81427e-61	-0.512079	0.997	0.998	6.64041e-57
COL4A2	4.72408e-61	0.92761	0.555	0.314	1.72906e-56
CXCR4	5.54041e-61	0.243574	0.073	0.006	2.02784e-56
ENPP2	5.98995e-61	1.25699	0.618	0.388	2.19238e-56
RPL41	1.89456e-60	-0.44587	0.999	1	6.93429e-56
RPS2	2.03191e-58	-0.514968	1	0.999	7.43701e-54
PRCP	2.9704e-58	-0.727697	0.321	0.598	1.08719e-53
RPL26	1.75028e-57	-0.460362	0.997	0.999	6.40619e-53
RPL35A	2.77543e-57	-0.465422	0.997	0.998	1.01583e-52
EDNRB	3.8641e-56	0.893572	0.301	0.118	1.4143e-51
RPS12	1.23716e-55	-0.45623	1	0.999	4.52812e-51
RPL11	3.37764e-55	-0.420743	0.999	0.999	1.23625e-50
RPS19	1.30613e-54	-0.477929	0.997	0.999	4.78057e-50
RPS6	1.80844e-54	-0.473905	0.995	0.998	6.61907e-50
RPS15	2.74198e-52	-0.440881	0.997	0.997	1.00359e-47
RPL37A	4.64706e-52	-0.413925	0.997	0.998	1.70087e-47
C1orf54	6.26541e-52	0.324736	0.188	0.052	2.2932e-47
FAM13C	7.1275e-52	0.703428	0.54	0.316	2.60874e-47
PLVAP	1.45982e-51	0.816867	0.847	0.73	5.34308e-47
RPS4X	2.34524e-51	-0.462696	0.997	0.996	8.58382e-47
MMP28	5.87649e-51	-0.693825	0.147	0.402	2.15085e-46
COL4A1	1.54096e-50	0.932006	0.429	0.224	5.64006e-46
CD300LG	7.69107e-50	0.286807	0.1	0.017	2.81501e-45
RPL38	1.53016e-49	-0.470777	0.972	0.99	5.60055e-45
RPL18	1.57839e-49	-0.464991	0.987	0.995	5.77707e-45
SELP	2.04263e-49	-0.704093	0.094	0.337	7.47623e-45
ACTG1	2.44528e-49	-0.562018	0.942	0.978	8.94998e-45
VIM	2.72144e-49	-0.38317	1	1	9.96073e-45
GAPDH	4.12123e-49	-0.569977	0.952	0.977	1.50841e-44
PTMS	4.51992e-49	-0.584053	0.862	0.93	1.65434e-44
IFI27	9.92375e-49	0.659092	0.987	0.976	3.63219e-44
FBLN2	1.63303e-48	-0.705124	0.096	0.338	5.97704e-44
C16orf74	4.32083e-48	0.144847	0.062	0.006	1.58147e-43
BST2	5.40568e-48	0.746651	0.611	0.392	1.97853e-43
TFPI	5.91837e-48	-0.739521	0.436	0.662	2.16618e-43
HSPB1	6.50918e-48	-0.592805	0.859	0.933	2.38243e-43
IER3	3.04227e-47	-1.24919	0.552	0.735	1.1135e-42
MSX1	4.31449e-47	0.382651	0.234	0.081	1.57915e-42
RPL19	5.394e-47	-0.422103	0.999	0.998	1.97426e-42
RPL7	2.67126e-46	-0.476901	0.966	0.982	9.77707e-42
TCIM	5.38638e-46	0.509785	0.206	0.068	1.97147e-41
FILIP1	6.49557e-46	0.478898	0.247	0.091	2.37744e-41
RPLP1	1.60442e-44	-0.367879	1	1	5.87234e-40
CST3	3.22324e-44	-0.492286	0.958	0.988	1.17974e-39
HLA-C	5.60478e-44	0.437189	0.981	0.98	2.05141e-39
COL15A1	7.99239e-44	0.65598	0.631	0.406	2.92529e-39
RPL17	9.15485e-44	-0.423174	0.985	0.994	3.35077e-39
RPL3	2.78064e-43	-0.405857	0.997	0.999	1.01774e-38
RAMP3	1.01825e-42	-0.742143	0.537	0.727	3.72689e-38
NACA	1.13429e-42	-0.449946	0.987	0.993	4.15163e-38
RPS27A	1.4051e-42	-0.374717	0.997	0.999	5.14279e-38
AKR1C1	1.72607e-42	-1.00009	0.204	0.426	6.3176e-38
VWF	1.89336e-42	-0.79421	0.756	0.857	6.92987e-38
ESM1	3.46557e-42	0.202537	0.044	0.003	1.26843e-37
IVNS1ABP	3.91754e-42	0.73388	0.22	0.082	1.43386e-37
RPS25	1.08936e-41	-0.416608	0.983	0.996	3.98717e-37
RPL7A	1.90721e-41	-0.415247	0.991	0.995	6.98056e-37
RPLP2	2.29591e-41	-0.371995	0.988	0.998	8.40327e-37
TMEM37	2.49546e-41	0.132645	0.072	0.01	9.13362e-37
RPS24	5.82207e-41	-0.375117	0.995	1	2.13093e-36
RPS28	2.04938e-40	-0.357308	0.999	1	7.50095e-36
SIPA1L2	5.58345e-40	0.216554	0.094	0.019	2.0436e-35
RPL13A	2.13676e-39	-0.360244	0.995	0.995	7.82074e-35
RPL10A	2.6202e-39	-0.424491	0.985	0.99	9.59019e-35
RPL29	2.97995e-39	-0.436611	0.992	0.995	1.09069e-34
RPL24	3.93993e-39	-0.405332	0.976	0.993	1.44205e-34
RPL21	6.25559e-39	-0.365728	0.997	0.997	2.28961e-34
EEF1B2	7.49306e-39	-0.506541	0.864	0.93	2.74254e-34
IL32	3.17155e-38	0.716961	0.347	0.172	1.16082e-33
RPS9	3.75236e-38	-0.4151	0.986	0.995	1.3734e-33
RPS3A	3.96284e-38	-0.394038	0.994	0.997	1.45044e-33
FAU	7.17313e-38	-0.366889	0.988	0.996	2.62544e-33
RPS13	7.17994e-38	-0.372432	0.983	0.997	2.62793e-33
IL1R1	1.11655e-37	-0.685186	0.259	0.473	4.08669e-33
FTH1	2.26743e-37	-0.433162	0.956	0.983	8.29903e-33
FAM107A	3.22624e-37	0.490069	0.298	0.137	1.18084e-32
ALPL	5.61502e-37	0.188419	0.092	0.019	2.05515e-32
RPS11	7.96163e-37	-0.379456	0.98	0.99	2.91403e-32
SNCG	1.81621e-36	-0.59202	0.436	0.635	6.6475e-32
EEF1G	2.22284e-36	-0.464137	0.909	0.947	8.13581e-32
SEC14L1	1.37174e-35	0.606928	0.583	0.406	5.02072e-31
RPL36	1.47595e-35	-0.375918	0.987	0.995	5.40212e-31
RPS20	1.75539e-35	-0.418685	0.965	0.983	6.4249e-31
RPL36A	4.92967e-35	-0.387945	0.985	0.995	1.80431e-30
TSPAN13	1.19202e-34	0.44602	0.293	0.136	4.36289e-30
RPL31	1.96416e-34	-0.425239	0.92	0.96	7.18904e-30
ARHGAP29	2.23623e-34	0.56337	0.793	0.664	8.18481e-30
RPL27A	2.88108e-34	-0.348009	0.979	0.99	1.0545e-29
GPIHBP1	3.12375e-34	0.482735	0.212	0.084	1.14332e-29
RPS8	6.9046e-34	-0.328549	1	1	2.52715e-29
HEY1	2.3539e-33	0.349028	0.169	0.058	8.61551e-29
INSR	3.30043e-33	0.636715	0.275	0.131	1.20799e-28
RPS5	5.23455e-33	-0.429948	0.959	0.983	1.9159e-28
S100A4	5.83344e-33	0.504865	0.828	0.699	2.1351e-28
KLF2	6.79889e-33	-0.448295	0.828	0.935	2.48846e-28
MLEC	1.08492e-32	0.378534	0.206	0.083	3.9709e-28
ARL4A	2.44048e-32	-0.560814	0.455	0.636	8.9324e-28
MEF2C	3.04976e-32	0.625835	0.698	0.564	1.11624e-27
DIXDC1	6.60859e-32	-0.55115	0.114	0.3	2.41881e-27
GAS5	7.29265e-32	-0.498567	0.747	0.841	2.66918e-27
COL13A1	7.36098e-32	0.109589	0.037	0.003	2.69419e-27
RPS3	4.78924e-31	-0.372133	0.988	0.993	1.75291e-26
ITGB4	1.20167e-30	-0.568177	0.47	0.64	4.39824e-26
RPL9	1.67187e-30	-0.329391	0.98	0.994	6.1192e-26
RPL27	1.68705e-30	-0.380408	0.952	0.97	6.17476e-26
BTG1	1.83314e-30	0.640915	0.805	0.701	6.70949e-26
RPL22	2.69005e-30	-0.352386	0.981	0.992	9.84583e-26
METRNL	7.79914e-30	-0.505981	0.162	0.349	2.85456e-25
GUK1	1.1696e-29	-0.470443	0.759	0.867	4.28086e-25
TGFBR3	2.02695e-29	-0.538592	0.355	0.54	7.41885e-25
NOP53	2.64739e-29	-0.445252	0.762	0.861	9.68971e-25
INHBB	2.74268e-29	0.437247	0.223	0.098	1.00385e-24
SULF1	3.11229e-29	-0.549266	0.058	0.22	1.13913e-24
RPL8	4.17211e-29	-0.346112	0.997	0.999	1.52703e-24
TM4SF18	8.6573e-29	0.605758	0.469	0.304	3.16866e-24
RPL23A	1.3763e-28	-0.372023	0.958	0.976	5.03741e-24
PTMA	1.40838e-28	0.298759	1	0.999	5.15482e-24
SEZ6L2	2.46394e-28	0.103936	0.041	0.005	9.01828e-24
RACK1	7.09199e-28	-0.373411	0.951	0.974	2.59574e-23
CPM	2.3551e-27	0.170073	0.059	0.011	8.61989e-23
RPS10	2.69121e-27	-0.380148	0.95	0.97	9.85009e-23
CYP1B1	2.78706e-27	-0.821145	0.072	0.227	1.02009e-22
OLFM1	3.13739e-27	-0.514286	0.182	0.355	1.14832e-22
KDR	3.32506e-27	0.485031	0.382	0.228	1.217e-22
NNMT	5.11855e-27	-0.663237	0.147	0.316	1.87344e-22
ANGPT2	5.60702e-27	1.09971	0.449	0.302	2.05223e-22
CCL23	7.39818e-27	-0.647255	0.096	0.263	2.70781e-22
CX3CL1	1.6812e-26	0.415215	0.147	0.054	6.15335e-22
PRDM1	2.44813e-26	0.228031	0.105	0.031	8.96041e-22
TPM1	3.35479e-26	0.427401	0.343	0.193	1.22789e-21
TMEM204	9.35672e-26	0.460524	0.424	0.271	3.42465e-21
LIFR	1.43527e-25	-0.573797	0.474	0.637	5.25322e-21
SPHK1	1.67212e-25	-0.47166	0.279	0.458	6.12014e-21
AKR1C2	3.71073e-25	-0.690862	0.076	0.224	1.35816e-20
PFDN5	4.81416e-25	-0.369347	0.885	0.939	1.76203e-20
MARCKS	5.62666e-25	-0.547527	0.261	0.433	2.05941e-20
TSC22D3	1.22696e-24	-0.534351	0.457	0.609	4.4908e-20
SNHG29	1.39333e-24	-0.449408	0.829	0.9	5.09974e-20
SELE	1.89362e-24	-0.712082	0.115	0.276	6.93085e-20
ADGRA2	3.20204e-24	-0.398185	0.043	0.177	1.17198e-19
LNX1	7.27998e-24	0.347473	0.218	0.104	2.66455e-19
ACTN1	7.75425e-24	-0.47512	0.379	0.543	2.83813e-19
ELN	7.92193e-24	-0.389471	0.062	0.202	2.8995e-19
AQP1	3.26573e-23	0.519529	0.96	0.934	1.19529e-18
KCNQ1	3.2771e-23	0.117423	0.045	0.008	1.19945e-18
NRN1	8.67663e-23	-0.470991	0.417	0.571	3.17573e-18
TPD52L1	8.9075e-23	-0.417054	0.143	0.297	3.26023e-18
RPL6	1.13892e-22	-0.314005	0.988	0.994	4.16856e-18
DGKD	1.41692e-22	0.177334	0.064	0.015	5.18607e-18
SH3BGRL3	1.75303e-22	-0.456624	0.79	0.868	6.41628e-18
ARRDC3	2.19749e-22	0.358041	0.223	0.111	8.04304e-18
CAVIN2	2.8561e-22	-0.451456	0.478	0.625	1.04536e-17
CXCL12	3.08948e-22	0.599786	0.237	0.121	1.13078e-17
NPC2	3.21639e-22	-0.465824	0.589	0.705	1.17723e-17
ETS1	3.26909e-22	0.496615	0.615	0.487	1.19652e-17
TSPAN15	3.87795e-22	0.284965	0.164	0.071	1.41937e-17
MT2A	6.13015e-22	-1.02036	0.747	0.855	2.2437e-17
RPL14	7.6037e-22	-0.292882	0.979	0.99	2.78303e-17
EXOC3L2	8.05135e-22	0.228297	0.108	0.037	2.94687e-17
GADD45B	9.21552e-22	-0.659464	0.646	0.776	3.37297e-17
RPL15	1.53289e-21	-0.280935	0.98	0.989	5.61054e-17
PDIA5	1.87624e-21	-0.375858	0.174	0.323	6.86721e-17
MYO1B	2.00601e-21	0.223905	0.118	0.043	7.34221e-17
TP53I11	2.41399e-21	0.156436	0.101	0.034	8.83543e-17
EPB41L3	2.41866e-21	-0.363851	0.077	0.211	8.85255e-17
PCDH19	4.38747e-21	-0.354723	0.072	0.205	1.60586e-16
RGS3	5.88311e-21	0.31498	0.213	0.106	2.15328e-16
SLC9A3R2	6.34763e-21	0.598612	0.678	0.603	2.32329e-16
PALLD	1.04803e-20	-0.320463	0.047	0.171	3.83591e-16
PRMT1	1.16533e-20	0.433324	0.646	0.515	4.26523e-16
RASGRF2	1.66033e-20	0.235954	0.148	0.062	6.07698e-16
CCDC85B	3.17292e-20	0.387978	0.84	0.769	1.16132e-15
TMSB10	3.74391e-20	-0.26923	0.995	0.999	1.37031e-15
LTC4S	4.58115e-20	-0.365178	0.077	0.208	1.67675e-15
CAV1	5.64282e-20	0.474696	0.964	0.965	2.06533e-15
ATOH8	6.91977e-20	0.317745	0.19	0.093	2.53271e-15
LRATD1	7.21812e-20	0.248276	0.099	0.034	2.6419e-15
SPRED2	7.6727e-20	0.178675	0.099	0.034	2.80828e-15
EIF1	8.42465e-20	-0.259444	0.951	0.981	3.08351e-15
NQO1	1.0218e-19	0.299139	0.226	0.119	3.73987e-15
APLP2	1.15247e-19	0.473639	0.657	0.551	4.21816e-15
TIMP1	1.22891e-19	-0.459786	0.643	0.745	4.49793e-15
MAML2	1.36282e-19	0.31379	0.251	0.138	4.98805e-15
TCF4	1.56578e-19	0.427777	0.861	0.795	5.73091e-15
RPS17	2.03334e-19	-0.296113	0.955	0.974	7.44222e-15
ECSCR	2.36606e-19	-0.382522	0.724	0.811	8.66001e-15
PTP4A3	2.4157e-19	0.208634	0.15	0.066	8.8417e-15
MGP	2.72616e-19	-1.38623	0.887	0.913	9.978e-15
HLA-A	3.53883e-19	0.316084	0.985	0.985	1.29525e-14
RPL5	4.21553e-19	-0.267238	0.985	0.992	1.54293e-14
SCARA3	4.71959e-19	-0.331143	0.04	0.15	1.72742e-14
LGALS1	5.71684e-19	0.864055	0.53	0.408	2.09242e-14
PLCB1	7.4397e-19	0.334115	0.28	0.161	2.72301e-14
LRRC1	9.55807e-19	-0.331652	0.089	0.216	3.49835e-14
SCN1B	1.852e-18	-0.321566	0.134	0.269	6.77849e-14
MYL12A	2.00227e-18	-0.318014	0.823	0.901	7.32852e-14
TMEM47	2.09975e-18	0.176732	0.105	0.039	7.68529e-14
HBEGF	3.65749e-18	0.243862	0.219	0.116	1.33868e-13
EMC8	3.94181e-18	0.19428	0.171	0.081	1.44274e-13
SNHG5	4.03582e-18	-0.382128	0.734	0.806	1.47715e-13
RPLP0	4.21399e-18	-0.303484	0.962	0.98	1.54236e-13
CTTNBP2	4.48142e-18	-0.279702	0.021	0.117	1.64025e-13
PRXL2A	5.42001e-18	-0.4176	0.38	0.533	1.98378e-13
RPL4	5.48976e-18	-0.30663	0.828	0.887	2.00931e-13
SH3TC1	5.81782e-18	0.210583	0.078	0.025	2.12938e-13
ABCB1	6.17221e-18	0.433297	0.38	0.253	2.25909e-13
SLCO2B1	6.77151e-18	0.222693	0.141	0.062	2.47844e-13
TNFRSF4	7.88964e-18	0.134448	0.061	0.016	2.88769e-13
LIMS1	8.2032e-18	-0.401192	0.515	0.642	3.00245e-13
GCHFR	8.87062e-18	-0.335623	0.105	0.23	3.24674e-13
FOS	9.99811e-18	-0.419204	0.878	0.939	3.65941e-13
RNASE1	1.43852e-17	-0.3631	0.821	0.897	5.26514e-13
BMX	1.50228e-17	-0.369833	0.129	0.257	5.49848e-13
CLIC5	1.86024e-17	0.119562	0.064	0.018	6.80865e-13
ZFAS1	2.38555e-17	-0.40415	0.666	0.758	8.73135e-13
TUBB	2.42199e-17	-0.355662	0.583	0.698	8.86473e-13
CTSH	3.29379e-17	0.434942	0.66	0.539	1.20556e-12
HLX	3.47134e-17	0.154274	0.084	0.029	1.27054e-12
SNCA	3.92693e-17	-0.336967	0.079	0.192	1.43729e-12
EFNA1	4.34893e-17	0.382981	0.54	0.407	1.59175e-12
KCTD12	5.91084e-17	-0.417764	0.66	0.762	2.16343e-12
RCAN1	6.22607e-17	0.469679	0.247	0.144	2.2788e-12
LRRC32	6.47915e-17	-0.340917	0.14	0.267	2.37143e-12
RUNDC3B	6.63708e-17	0.420073	0.255	0.148	2.42924e-12
JUNB	7.79471e-17	-0.401178	0.878	0.927	2.85294e-12
YBX1	9.60119e-17	-0.315802	0.886	0.921	3.51413e-12
DBI	1.4e-16	0.320934	0.545	0.42	5.12415e-12
SORT1	1.44691e-16	0.159072	0.107	0.043	5.29583e-12
JAG2	1.58258e-16	0.251138	0.259	0.149	5.79241e-12
PLAU	1.68971e-16	0.124872	0.061	0.017	6.18451e-12
FMO2	2.18702e-16	0.152575	0.048	0.012	8.00471e-12
RPL18A	2.24555e-16	-0.255178	0.991	0.995	8.21895e-12
LDHA	2.46706e-16	-0.354976	0.734	0.817	9.0297e-12
SYNGR2	3.11701e-16	-0.336687	0.365	0.496	1.14086e-11
PPP1R14B	3.23133e-16	-0.404812	0.441	0.563	1.1827e-11
ADGRL4	3.3316e-16	0.418733	0.755	0.686	1.2194e-11
COMMD6	3.3727e-16	-0.308328	0.653	0.75	1.23444e-11
TSPO	3.47476e-16	-0.32594	0.631	0.738	1.2718e-11
GNG12	3.60397e-16	-0.280898	0.218	0.356	1.31909e-11
ARL6IP1	4.22641e-16	-0.452216	0.434	0.559	1.54691e-11
EFNB2	4.25612e-16	0.307927	0.358	0.232	1.55778e-11
AKR1C3	4.3121e-16	-0.380061	0.403	0.53	1.57827e-11
ITGA1	4.70137e-16	0.32401	0.245	0.143	1.72075e-11
PDGFB	5.43708e-16	0.531185	0.538	0.435	1.99003e-11
NFKBIA	5.88781e-16	-0.37225	0.569	0.698	2.155e-11
YWHAH	6.24428e-16	0.424429	0.531	0.409	2.28547e-11
ITGA8	6.24681e-16	0.122151	0.04	0.008	2.2864e-11
MT-ND2	6.34811e-16	-0.38052	0.991	0.995	2.32347e-11
MCC	7.38877e-16	0.180747	0.11	0.045	2.70437e-11
TOMM7	8.89021e-16	-0.310257	0.812	0.879	3.25391e-11
MALAT1	9.08902e-16	0.236934	1	0.999	3.32667e-11
TMOD1	1.15932e-15	-0.253827	0.033	0.124	4.24324e-11
ST8SIA6	1.2124e-15	-0.274076	0.028	0.117	4.43751e-11
PLXDC2	1.237e-15	-0.283459	0.075	0.182	4.52754e-11
ANXA2	1.27073e-15	-0.299068	0.848	0.906	4.65099e-11
RALA	1.36032e-15	0.312104	0.31	0.196	4.9789e-11
LMO2	1.47223e-15	-0.382024	0.584	0.686	5.3885e-11
ADRB2	1.55193e-15	0.277104	0.224	0.127	5.6802e-11
PDLIM1	1.75568e-15	-0.331222	0.657	0.758	6.42598e-11
PKM	1.80375e-15	-0.310066	0.41	0.537	6.60192e-11
RPL28	2.09687e-15	-0.23362	0.995	0.998	7.67474e-11
VWA1	2.24437e-15	0.422311	0.474	0.355	8.21463e-11
NR4A1	2.31771e-15	0.365524	0.266	0.161	8.48306e-11
DYSF	2.88191e-15	0.221552	0.16	0.08	1.05481e-10
PIK3R3	3.23557e-15	0.326264	0.366	0.246	1.18425e-10
CYP1A1	3.28611e-15	0.354184	0.101	0.042	1.20275e-10
LYST	3.32097e-15	-0.337284	0.092	0.204	1.21551e-10
EFEMP1	4.35906e-15	-0.661292	0.176	0.296	1.59546e-10
ITPR2	4.79279e-15	-0.388528	0.159	0.277	1.75421e-10
HOXD9	6.25087e-15	0.348351	0.401	0.282	2.28788e-10
KLF4	7.35986e-15	-0.387469	0.389	0.519	2.69378e-10
PTPRG	7.93625e-15	0.175074	0.141	0.067	2.90475e-10
MYL9	8.20708e-15	0.311149	0.369	0.254	3.00387e-10
RAB3C	8.42625e-15	-0.215926	0.009	0.083	3.08409e-10
NET1	1.22276e-14	-0.291849	0.255	0.388	4.47542e-10
PTPRK	1.30916e-14	0.286422	0.287	0.178	4.79165e-10
ALDH1A2	1.45449e-14	-0.212162	0.013	0.088	5.32359e-10
MGLL	1.46757e-14	0.471213	0.643	0.555	5.37144e-10
FILIP1L	1.62203e-14	-0.376617	0.2	0.325	5.93678e-10
METTL7A	1.66425e-14	-0.275865	0.117	0.229	6.09134e-10
IL6ST	1.84894e-14	-0.423584	0.486	0.59	6.76731e-10
FOXC1	2.00637e-14	-0.384949	0.205	0.327	7.34352e-10
CDC42EP1	2.02412e-14	0.193314	0.179	0.095	7.40849e-10
FLT1	2.21603e-14	0.528986	0.512	0.412	8.11088e-10
FABP5	2.35571e-14	-0.302036	0.396	0.527	8.62215e-10
SOX17	2.40546e-14	0.318288	0.288	0.18	8.80422e-10
OLFML2A	2.70251e-14	0.290463	0.226	0.132	9.89146e-10
PODXL	2.75436e-14	0.396824	0.493	0.381	1.00812e-09
PASK	2.81863e-14	0.122125	0.05	0.014	1.03165e-09
UBA52	2.86404e-14	-0.25628	0.95	0.973	1.04827e-09
FTL	2.94564e-14	-0.263302	0.959	0.979	1.07813e-09
CCNI	3.24976e-14	-0.312916	0.628	0.718	1.18944e-09
RASSF9	3.34288e-14	-0.282992	0.092	0.196	1.22353e-09
PRKAG2	3.42436e-14	-0.293226	0.104	0.208	1.25335e-09
CRYBG3	4.08983e-14	0.423309	0.464	0.346	1.49692e-09
PDE10A	4.29657e-14	0.124271	0.07	0.024	1.57259e-09
CPVL	4.93634e-14	-0.339891	0.191	0.314	1.80675e-09
RPS7	5.15091e-14	-0.248135	0.992	0.991	1.88529e-09
NAV1	6.25627e-14	0.202666	0.157	0.08	2.28986e-09
LPCAT2	6.50221e-14	0.340977	0.302	0.195	2.37988e-09
CTSC	6.51977e-14	-0.471817	0.378	0.493	2.3863e-09
SNHG7	7.26867e-14	-0.320078	0.763	0.829	2.6604e-09
PLCB4	8.06946e-14	-0.299455	0.093	0.195	2.9535e-09
NES	8.32e-14	0.239859	0.167	0.088	3.0452e-09
CYGB	9.11531e-14	0.221036	0.166	0.087	3.3363e-09
SYT15	1.02711e-13	-0.20924	0.023	0.101	3.75933e-09
APLN	1.08863e-13	0.145253	0.036	0.008	3.98448e-09
PGM5	1.159e-13	-0.309032	0.107	0.211	4.24205e-09
LFNG	1.15901e-13	-0.335258	0.157	0.272	4.24209e-09
PCAT19	1.25873e-13	-0.328085	0.656	0.758	4.60707e-09
PXDN	1.2717e-13	0.29807	0.247	0.151	4.65455e-09
RDX	1.34486e-13	0.394926	0.663	0.577	4.92234e-09
AGPAT2	1.45759e-13	-0.282248	0.145	0.256	5.33494e-09
ENTPD1	1.47603e-13	-0.272769	0.224	0.347	5.40243e-09
NPDC1	1.75795e-13	-0.323709	0.732	0.821	6.43427e-09
NIBAN1	2.27292e-13	0.220652	0.121	0.058	8.31912e-09
PTGIS	2.94494e-13	-0.266381	0.019	0.091	1.07788e-08
OST4	3.02762e-13	-0.298486	0.55	0.664	1.10814e-08
CTSZ	3.14995e-13	-0.33483	0.372	0.49	1.15291e-08
ANGPTL2	3.84126e-13	0.212726	0.183	0.102	1.40594e-08
FGF2	3.96383e-13	-0.344406	0.179	0.29	1.4508e-08
SNHG6	4.37718e-13	-0.308775	0.695	0.772	1.60209e-08
EEF1A1	4.65325e-13	-0.172103	1	1	1.70314e-08
RSAD2	4.83567e-13	0.216924	0.138	0.069	1.7699e-08
FADS3	5.06766e-13	0.167988	0.138	0.068	1.85481e-08
EDN1	5.61914e-13	-0.365852	0.456	0.571	2.05666e-08
VCAN	5.66398e-13	-0.232908	0.01	0.077	2.07307e-08
CCN1	7.63013e-13	0.428958	0.392	0.283	2.79271e-08
CAPNS1	8.65972e-13	-0.292315	0.544	0.647	3.16954e-08
PALMD	1.00166e-12	0.408856	0.777	0.722	3.66617e-08
CDH24	1.09322e-12	0.119596	0.072	0.027	4.00128e-08
AFAP1L1	1.21673e-12	0.225047	0.251	0.157	4.45336e-08
CD151	1.46295e-12	-0.294105	0.672	0.762	5.35456e-08
ITGA6	1.47855e-12	0.357849	0.774	0.698	5.41163e-08
ANP32B	1.58419e-12	-0.273036	0.52	0.635	5.79828e-08
CD59	1.70659e-12	-0.301616	0.851	0.895	6.24631e-08
ISG15	1.79826e-12	0.515961	0.465	0.364	6.5818e-08
CALM1	1.8014e-12	0.329346	0.953	0.944	6.5933e-08
LAYN	1.86349e-12	0.23636	0.199	0.116	6.82057e-08
MYRIP	1.89909e-12	-0.246026	0.111	0.212	6.95087e-08
FAM110D	2.22066e-12	-0.345061	0.432	0.541	8.12783e-08
MLPH	2.22625e-12	-0.230203	0.056	0.141	8.14829e-08
PLCXD3	2.31722e-12	-0.201318	0.003	0.061	8.48125e-08
KRT7	2.43067e-12	-0.196786	0.016	0.084	8.89649e-08
ESAM	2.78059e-12	0.319924	0.649	0.553	1.01772e-07
CDS2	2.81333e-12	0.212102	0.198	0.115	1.02971e-07
SEMA6A	3.11686e-12	-0.319804	0.129	0.228	1.1408e-07
CADM3-AS1	3.21579e-12	-0.203137	0.021	0.09	1.17701e-07
GPRC5B	3.26101e-12	0.243844	0.212	0.128	1.19356e-07
TXNIP	3.31506e-12	-0.214724	0.964	0.982	1.21335e-07
MCF2L	3.47267e-12	0.273174	0.265	0.17	1.27103e-07
RAB11FIP1	3.57045e-12	-0.225054	0.059	0.145	1.30682e-07
ST13	3.76956e-12	-0.329319	0.604	0.698	1.3797e-07
KLHL5	3.89839e-12	0.290164	0.225	0.138	1.42685e-07
ST8SIA4	4.34079e-12	0.135226	0.087	0.037	1.58877e-07
SGK1	5.53624e-12	0.23668	0.189	0.11	2.02632e-07
STC1	5.85505e-12	0.289841	0.189	0.11	2.14301e-07
MYOF	6.1278e-12	-0.306244	0.294	0.404	2.24284e-07
EPAS1	6.55085e-12	0.314702	0.712	0.633	2.39768e-07
HYAL2	6.75873e-12	-0.34378	0.507	0.606	2.47376e-07
DUSP23	7.40471e-12	-0.327209	0.434	0.538	2.7102e-07
BHLHE41	8.83169e-12	-0.212764	0.031	0.104	3.23249e-07
TLL1	1.01732e-11	-0.182941	0.031	0.104	3.7235e-07
EEF1D	1.06621e-11	-0.309503	0.853	0.911	3.90242e-07
ERP29	1.07486e-11	-0.326158	0.435	0.536	3.93411e-07
PHLDA1	1.07807e-11	0.229786	0.2	0.119	3.94586e-07
NDRG4	1.13444e-11	-0.190088	0.022	0.089	4.15218e-07
NME2	1.1459e-11	-0.224454	0.904	0.936	4.1941e-07
ARL15	1.19896e-11	0.176202	0.216	0.129	4.38832e-07
HLA-B	1.20085e-11	0.19394	0.993	0.993	4.39524e-07
FBN1	1.22566e-11	-0.250931	0.058	0.139	4.48604e-07
PLSCR4	1.28508e-11	-0.254241	0.185	0.291	4.70351e-07
HMGB1	1.28677e-11	0.256255	0.97	0.966	4.70972e-07
UACA	1.39536e-11	0.381389	0.601	0.512	5.10714e-07
PTPRB	1.46727e-11	-0.299604	0.423	0.529	5.37034e-07
SEMA6B	1.53065e-11	0.229989	0.2	0.121	5.60233e-07
PCDH17	1.59253e-11	0.229827	0.149	0.081	5.82882e-07
RPS16	1.94964e-11	-0.177755	0.984	0.991	7.13588e-07
FLNA	2.18543e-11	-0.314095	0.359	0.466	7.99888e-07
NFE2L1	2.24029e-11	-0.29354	0.413	0.516	8.19968e-07
CLDN11	2.34413e-11	-0.263453	0.098	0.186	8.57974e-07
BAIAP2	2.5413e-11	-0.285171	0.114	0.205	9.30141e-07
CNOT6L	2.54612e-11	0.254042	0.308	0.212	9.31907e-07
LINC01197	2.54957e-11	-0.168514	0.017	0.08	9.33169e-07
RPSA	2.55922e-11	-0.254591	0.91	0.945	9.36701e-07
SORBS2	2.57687e-11	0.276155	0.219	0.138	9.43161e-07
CLEC14A	3.42585e-11	0.293499	0.832	0.819	1.2539e-06
NDST1	3.46076e-11	0.190819	0.146	0.079	1.26667e-06
SLC41A3	3.52736e-11	-0.196095	0.096	0.187	1.29105e-06
TIMP3	3.58829e-11	0.28204	0.865	0.814	1.31335e-06
SGIP1	3.91941e-11	0.128647	0.061	0.023	1.43455e-06
CADM3	4.70967e-11	-0.220355	0.031	0.1	1.72379e-06
CSF2RB	4.774e-11	-0.223959	0.094	0.183	1.74733e-06
ADM	4.83457e-11	0.147619	0.139	0.073	1.7695e-06
CEBPD	5.11304e-11	-0.353274	0.478	0.576	1.87142e-06
WWP1	7.25603e-11	-0.242608	0.281	0.389	2.65578e-06
AHNAK	7.55772e-11	-0.262836	0.786	0.851	2.7662e-06
DLL4	7.85841e-11	0.284478	0.189	0.114	2.87626e-06
ACE	8.26589e-11	0.381442	0.35	0.256	3.0254e-06
RIN3	1.02704e-10	0.114752	0.078	0.033	3.75908e-06
ACACB	1.03708e-10	-0.181829	0.066	0.147	3.79582e-06
CPE	1.1756e-10	-0.277192	0.016	0.074	4.30282e-06
MYO10	1.29962e-10	0.218416	0.134	0.073	4.75674e-06
UQCRB	1.42187e-10	-0.238484	0.819	0.878	5.20417e-06
SPTAN1	1.42813e-10	-0.328028	0.395	0.492	5.2271e-06
AOC3	1.47413e-10	0.130014	0.101	0.049	5.39547e-06
NCALD	1.47936e-10	0.144257	0.084	0.038	5.4146e-06
DACH1	1.64139e-10	0.230226	0.195	0.119	6.00764e-06
LRMP	1.68905e-10	0.130981	0.078	0.034	6.18207e-06
LTBP1	1.77239e-10	-0.17385	0.033	0.099	6.48711e-06
TCN2	1.85459e-10	-0.218672	0.058	0.132	6.78798e-06
ECE1	1.95215e-10	-0.292713	0.505	0.589	7.14506e-06
RYR3	1.96666e-10	-0.158847	0.015	0.073	7.19817e-06
YBX3	1.9817e-10	-0.283153	0.774	0.835	7.25323e-06
ZNF521	2.01423e-10	-0.253293	0.145	0.239	7.37227e-06
PTPRE	2.01938e-10	-0.306954	0.119	0.205	7.39114e-06
GJC2	2.07812e-10	-0.200657	0.033	0.098	7.60611e-06
SLC12A2	2.13929e-10	0.166733	0.111	0.056	7.83e-06
PIM3	2.2743e-10	-0.302064	0.568	0.643	8.32417e-06
SH3BGRL2	2.42104e-10	-0.274409	0.154	0.247	8.86126e-06
FAM167B	2.57966e-10	0.145721	0.125	0.065	9.44182e-06
MX2	2.69784e-10	0.237033	0.149	0.084	9.87435e-06
NFIA	3.11061e-10	-0.342502	0.499	0.578	1.13851e-05
PBX1	3.17597e-10	-0.264795	0.106	0.189	1.16244e-05
IFI6	3.24944e-10	0.369245	0.481	0.392	1.18933e-05
WDFY1	3.34896e-10	0.184888	0.2	0.123	1.22575e-05
JAM2	3.63662e-10	-0.253417	0.534	0.622	1.33104e-05
B2M	3.75724e-10	0.135484	1	1	1.37519e-05
KCNQ1OT1	4.00922e-10	0.205144	0.171	0.101	1.46741e-05
CLEC3B	4.03003e-10	-0.259624	0.231	0.336	1.47503e-05
PCDH12	4.06847e-10	0.121165	0.057	0.022	1.4891e-05
ACKR3	4.15275e-10	-0.242401	0.038	0.104	1.51995e-05
CLTA	4.23161e-10	-0.281247	0.495	0.586	1.54881e-05
PECAM1	4.31916e-10	-0.210045	0.922	0.934	1.58086e-05
RPS26	4.32338e-10	-0.344732	0.978	0.973	1.5824e-05
LRIG1	4.61604e-10	-0.209879	0.063	0.137	1.68952e-05
CSRP2	4.63577e-10	-0.283856	0.143	0.232	1.69674e-05
SAT1	4.76114e-10	0.287968	0.766	0.715	1.74263e-05
XAF1	5.02087e-10	0.3532	0.414	0.322	1.83769e-05
ZFYVE21	5.08144e-10	-0.203844	0.256	0.356	1.85986e-05
EIF3K	5.46942e-10	-0.255258	0.664	0.748	2.00186e-05
ID1	5.96384e-10	-0.308514	0.802	0.862	2.18282e-05
BMP4	6.67093e-10	-0.244238	0.055	0.125	2.44163e-05
PPL	7.54459e-10	-0.227445	0.121	0.208	2.76139e-05
RSPO3	7.61283e-10	-0.164887	0.007	0.056	2.78637e-05
LUZP1	8.08393e-10	0.287393	0.438	0.341	2.9588e-05
MT-ND1	8.24803e-10	-0.274334	0.979	0.987	3.01886e-05
EXOC6	8.55081e-10	-0.22032	0.134	0.224	3.12968e-05
AP3M2	8.87167e-10	0.159298	0.112	0.058	3.24712e-05
CEMIP2	9.22187e-10	0.20726	0.138	0.078	3.3753e-05
SRGN	9.23013e-10	0.144476	0.435	0.33	3.37832e-05
SLC25A6	1.08069e-09	-0.248808	0.643	0.721	3.95543e-05
RNF145	1.08958e-09	0.273791	0.329	0.24	3.98797e-05
EML1	1.15887e-09	0.112225	0.078	0.035	4.24158e-05
CRTAC1	1.17254e-09	-0.204066	0.008	0.056	4.29162e-05
PPDPF	1.18655e-09	-0.263389	0.287	0.391	4.3429e-05
LXN	1.26507e-09	0.158282	0.142	0.081	4.63029e-05
RPL23	1.52059e-09	-0.19768	0.959	0.977	5.5655e-05
IFI27L2	1.67754e-09	0.215569	0.224	0.147	6.13998e-05
ATP8A2	1.80594e-09	-0.128155	0.034	0.097	6.60992e-05
FLNB	1.80598e-09	-0.201117	0.274	0.381	6.61005e-05
THSD7A	1.93946e-09	0.257178	0.337	0.248	7.09863e-05
UQCRH	2.06823e-09	-0.268343	0.597	0.666	7.56992e-05
ITGA3	2.10189e-09	-0.21231	0.085	0.159	7.69313e-05
TESC	2.47169e-09	-0.237478	0.122	0.205	9.04663e-05
ICAM1	2.71666e-09	-0.191711	0.228	0.331	9.94326e-05
COL21A1	2.89181e-09	0.166545	0.099	0.05	0.000105843
RRBP1	3.0683e-09	-0.237942	0.442	0.532	0.000112303
SLC40A1	3.0864e-09	-0.210281	0.086	0.161	0.000112965
JDP2	3.42874e-09	0.164046	0.159	0.095	0.000125495
DIPK2B	3.54184e-09	-0.27441	0.353	0.442	0.000129635
LHX6	3.578e-09	-0.203966	0.076	0.149	0.000130958
LTBP4	3.58227e-09	-0.265738	0.131	0.214	0.000131115
DOC2B	3.76039e-09	-0.215749	0.15	0.236	0.000137634
AMIGO2	3.88396e-09	-0.180677	0.029	0.086	0.000142157
SNHG8	3.98107e-09	-0.25037	0.638	0.71	0.000145711
DARS	3.98212e-09	0.211113	0.263	0.181	0.00014575
FRMD4B	4.0224e-09	-0.265203	0.213	0.308	0.000147224
H2AFJ	4.07213e-09	0.22644	0.365	0.274	0.000149044
MEOX2	4.40397e-09	-0.238408	0.156	0.243	0.00016119
GPX4	4.5447e-09	-0.24902	0.584	0.656	0.000166341
KNOP1	4.58369e-09	0.265772	0.296	0.211	0.000167768
ATP5F1E	4.77089e-09	-0.188201	0.937	0.958	0.000174619
CAVIN3	4.85077e-09	0.275447	0.548	0.464	0.000177543
DEPTOR	4.98546e-09	0.158504	0.056	0.023	0.000182473
TINAGL1	5.02562e-09	-0.224137	0.246	0.341	0.000183943
ORAI2	5.74876e-09	0.130172	0.096	0.048	0.00021041
RAB11A	6.31941e-09	-0.236914	0.557	0.65	0.000231297
S1PR1	6.79031e-09	-0.266621	0.27	0.359	0.000248532
MEF2A	7.22065e-09	0.264774	0.479	0.389	0.000264283
TSPAN7	7.27682e-09	-0.28299	0.596	0.664	0.000266339
ITGA5	7.28528e-09	-0.240993	0.284	0.376	0.000266648
EEF2	7.3713e-09	-0.223104	0.779	0.822	0.000269797
SOCS3	7.72992e-09	-0.250693	0.682	0.765	0.000282923
TRAPPC6A	8.06814e-09	-0.208069	0.174	0.258	0.000295302
CALM2	8.47956e-09	-0.23079	0.716	0.786	0.00031036
LRRFIP1	8.62661e-09	-0.234545	0.674	0.743	0.000315742
ZNF503	8.88643e-09	0.13951	0.092	0.047	0.000325252
IFIT1	9.54341e-09	0.375887	0.259	0.181	0.000349298
AIF1L	9.69903e-09	0.198124	0.117	0.064	0.000354994
DSG2	9.98704e-09	-0.133466	0.015	0.064	0.000365536
DLC1	1.10009e-08	0.171553	0.181	0.114	0.000402642
HLA-E	1.1211e-08	-0.153974	0.981	0.992	0.000410334
MIR99AHG	1.17911e-08	-0.157092	0.026	0.079	0.000431566
GAS6	1.40406e-08	-0.309184	0.228	0.313	0.000513899
CCDC71L	1.52916e-08	-0.219443	0.118	0.194	0.000559687
HSD17B12	1.80444e-08	-0.224525	0.269	0.357	0.000660442
PEBP1	2.01718e-08	-0.262217	0.538	0.618	0.00073831
CAVIN1	2.02803e-08	-0.18626	0.875	0.916	0.00074228
APOLD1	2.07683e-08	0.255252	0.242	0.169	0.000760142
EIF4A2	2.16123e-08	-0.23367	0.378	0.467	0.000791031
CELF2	2.3574e-08	-0.233827	0.163	0.242	0.000862832
DYNLRB1	2.37762e-08	-0.20883	0.524	0.607	0.000870234
SESN3	2.45098e-08	-0.199068	0.098	0.172	0.000897084
ZNF706	2.54623e-08	-0.280852	0.38	0.456	0.000931945
PDGFD	2.54734e-08	0.101034	0.087	0.044	0.000932354
FIS1	2.56764e-08	-0.235906	0.617	0.698	0.000939782
MZT2B	2.58303e-08	-0.230387	0.543	0.627	0.000945416
CCDC68	2.64959e-08	-0.194348	0.113	0.188	0.000969778
GJA1	2.73885e-08	0.414248	0.346	0.268	0.00100245
TSHZ2	2.84729e-08	-0.231974	0.469	0.557	0.00104214
CSRP1	2.86208e-08	-0.181862	0.191	0.273	0.00104755
FGFR1	2.90396e-08	0.20606	0.184	0.12	0.00106288
STK17A	2.92525e-08	0.181494	0.216	0.143	0.00107067
TNFRSF1A	3.0421e-08	-0.246799	0.291	0.383	0.00111344
HAPLN3	3.2806e-08	-0.195161	0.087	0.157	0.00120073
ATP5MC2	3.46177e-08	-0.256513	0.707	0.77	0.00126704
EIF3E	3.486e-08	-0.255411	0.633	0.702	0.00127591
APCDD1	3.53969e-08	0.35222	0.19	0.126	0.00129556
CTNNB1	3.92314e-08	0.23576	0.382	0.295	0.00143591
DAB2	4.07901e-08	0.260929	0.404	0.319	0.00149296
MARVELD1	5.09199e-08	-0.135819	0.016	0.061	0.00186372
NRP1	5.48351e-08	0.282303	0.543	0.473	0.00200702
SLPI	5.49644e-08	-0.157789	0.029	0.081	0.00201175
PLAT	5.5501e-08	-0.232295	0.176	0.256	0.00203139
DLL1	5.66754e-08	-0.183395	0.059	0.12	0.00207438
TEK	5.93428e-08	-0.193658	0.12	0.195	0.00217201
LGALS3	6.07725e-08	-0.163564	0.942	0.969	0.00222434
HRCT1	6.3402e-08	-0.226483	0.131	0.206	0.00232058
EXOC3L1	7.07183e-08	0.101716	0.034	0.011	0.00258836
CPEB4	7.37043e-08	0.158959	0.183	0.118	0.00269765
EIF3G	7.57964e-08	-0.205144	0.531	0.61	0.00277423
ALCAM	7.73271e-08	-0.126044	0.02	0.066	0.00283025
HMGN3	8.06306e-08	-0.251063	0.386	0.468	0.00295116
HES4	8.21712e-08	0.164639	0.139	0.083	0.00300755
MEGF6	8.50062e-08	-0.143346	0.08	0.148	0.00311131
NDNF	8.84138e-08	0.100698	0.047	0.019	0.00323603
SWAP70	9.17908e-08	0.301798	0.442	0.359	0.00335963
IL27RA	9.28158e-08	0.117172	0.089	0.046	0.00339715
HOPX	9.46517e-08	-0.152531	0.029	0.079	0.00346435
CYSTM1	9.8742e-08	-0.233107	0.345	0.427	0.00361406
SPARCL1	9.94233e-08	0.167884	1	0.998	0.00363899
DSTN	1.01484e-07	-0.171208	0.915	0.949	0.00371442
ZDHHC17	1.01697e-07	-0.191371	0.107	0.177	0.00372223
CD302	1.07026e-07	-0.193144	0.128	0.202	0.00391727
PNMT	1.12491e-07	-0.126602	0.02	0.066	0.0041173
SERPING1	1.17374e-07	0.266491	0.529	0.454	0.00429602
GBP1	1.18096e-07	0.25248	0.217	0.148	0.00432244
GLUL	1.18737e-07	-0.216238	0.462	0.553	0.00434589
SH3BP5	1.22172e-07	-0.20666	0.513	0.598	0.0044716
ZNF366	1.27514e-07	0.149821	0.139	0.085	0.00466714
HDGFL3	1.28671e-07	-0.224422	0.31	0.394	0.00470949
YWHAB	1.35714e-07	0.196024	0.772	0.709	0.00496728
ADGRG6	1.40462e-07	-0.120877	0.012	0.052	0.00514104
FAM107B	1.4117e-07	-0.193033	0.103	0.172	0.00516697
TMEM273	1.42719e-07	-0.194011	0.23	0.315	0.00522365
THRB	1.51339e-07	-0.101487	0.008	0.046	0.00553916
SMIM26	1.55321e-07	-0.238646	0.286	0.365	0.00568489
HOMER3	1.59763e-07	-0.149717	0.073	0.137	0.00584747
AC007681.1	1.64643e-07	0.13178	0.068	0.033	0.00602608
CAPG	1.67061e-07	-0.137474	0.085	0.152	0.00611461
EIF4B	1.68169e-07	-0.22015	0.531	0.596	0.00615516
HINT2	1.69161e-07	-0.165912	0.112	0.185	0.00619146
AC108134.3	1.71731e-07	0.164566	0.082	0.042	0.00628554
COTL1	1.73646e-07	-0.215129	0.188	0.268	0.00635562
IER2	1.77685e-07	-0.246202	0.866	0.914	0.00650343
RALB	2.03445e-07	0.223811	0.336	0.257	0.00744628
CCDC186	2.04859e-07	0.278367	0.31	0.236	0.00749804
PCBP2	2.14214e-07	-0.220674	0.606	0.665	0.00784045
FMNL3	2.15824e-07	0.111574	0.127	0.076	0.00789936
RPL36AL	2.27788e-07	-0.264314	0.744	0.804	0.00833726
ADIPOR2	2.28442e-07	0.143998	0.157	0.099	0.00836121
ID2	2.31115e-07	-0.302766	0.287	0.366	0.00845903
CRHBP	2.44807e-07	-0.104217	0.006	0.041	0.0089602
S100A11	2.51491e-07	-0.215822	0.754	0.821	0.00920481
RHBDF2	2.54559e-07	0.10601	0.061	0.028	0.00931711
L1CAM	2.54952e-07	-0.16604	0.058	0.116	0.00933151
VEGFC	2.58537e-07	-0.224109	0.094	0.157	0.00946271
LARP6	2.58647e-07	-0.17538	0.072	0.132	0.00946675
HSPG2	2.63768e-07	-0.20747	0.613	0.689	0.00965419
FAM171A1	2.7436e-07	-0.172045	0.071	0.13	0.0100419
C3orf70	2.75717e-07	0.104629	0.066	0.032	0.0100915
ARHGAP5	2.80371e-07	0.136146	0.211	0.144	0.0102619
NSA2	2.84912e-07	-0.221003	0.547	0.618	0.0104281
TCEA3	3.06774e-07	-0.14363	0.036	0.086	0.0112282
MDK	3.54782e-07	-0.175569	0.142	0.215	0.0129854
SERPINB1	3.56235e-07	-0.241372	0.347	0.422	0.0130385
PREX1	3.59751e-07	0.119254	0.076	0.039	0.0131673
ZNF532	3.68052e-07	0.123114	0.098	0.055	0.0134711
ETS2	3.73642e-07	0.261761	0.677	0.615	0.0136757
MRPS6	3.8613e-07	-0.200785	0.113	0.18	0.0141327
MCUB	4.14846e-07	-0.166647	0.19	0.265	0.0151838
IFIT3	4.27633e-07	0.277685	0.303	0.23	0.0156518
ARPC2	4.67167e-07	0.188252	0.61	0.542	0.0170988
TXN	4.70995e-07	-0.164349	0.614	0.703	0.0172389
SAMD5	4.76339e-07	-0.108	0.009	0.046	0.0174345
GNG5	4.81766e-07	-0.182356	0.596	0.673	0.0176331
DHRS7	4.96191e-07	-0.238425	0.357	0.439	0.0181611
GIMAP4	5.00091e-07	-0.24255	0.693	0.743	0.0183038
GRN	5.17318e-07	-0.213805	0.466	0.551	0.0189344
EZR	5.20989e-07	-0.192297	0.174	0.247	0.0190687
ASS1	5.21915e-07	0.224306	0.219	0.155	0.0191026
MYO6	5.54749e-07	0.168603	0.195	0.133	0.0203044
EMCN	5.77386e-07	0.247721	0.681	0.62	0.0211329
ITGB1	6.42063e-07	0.210331	0.824	0.786	0.0235001
MCMBP	6.43714e-07	0.152732	0.163	0.106	0.0235606
RBM17	6.46972e-07	0.25263	0.411	0.338	0.0236798
ATF3	6.48775e-07	-0.404676	0.255	0.332	0.0237458
HNRNPA1	6.51006e-07	-0.211872	0.818	0.851	0.0238275
UBE2J1	6.6043e-07	0.204877	0.246	0.178	0.0241724
LINC01116	6.61996e-07	0.199932	0.268	0.198	0.0242297
PRSS23	7.058e-07	0.356847	0.465	0.401	0.025833
UBE2H	7.12138e-07	0.184365	0.242	0.175	0.026065
PARP14	7.23313e-07	0.321805	0.348	0.276	0.026474
POMP	7.4747e-07	0.237557	0.55	0.482	0.0273581
CYSLTR1	7.71007e-07	0.145373	0.105	0.061	0.0282196
HLA-DQA2	7.73955e-07	-0.229733	0.128	0.193	0.0283275
PELI2	7.83701e-07	-0.121617	0.037	0.085	0.0286842
IRF2BPL	8.82583e-07	0.166783	0.199	0.138	0.0323034
WDR83OS	1.00045e-06	-0.18282	0.522	0.594	0.0366176
TACSTD2	1.01138e-06	-0.143949	0.054	0.107	0.0370177
PDLIM4	1.09228e-06	-0.201591	0.218	0.291	0.0399787
ACTN4	1.11023e-06	0.282614	0.676	0.62	0.0406355
CHSY1	1.1565e-06	0.195236	0.223	0.16	0.0423291
PGP	1.17341e-06	0.154808	0.178	0.12	0.042948
ARL6IP5	1.18217e-06	-0.21069	0.413	0.496	0.0432684
ATP11C	1.20754e-06	-0.210676	0.17	0.239	0.0441973
DKK3	1.21499e-06	-0.218332	0.1	0.162	0.0444698
PICALM	1.27343e-06	0.174449	0.283	0.214	0.0466089
CD63	1.34647e-06	-0.174206	0.904	0.934	0.0492821
SSR4	1.3746e-06	-0.209574	0.59	0.662	0.0503118
ZDHHC20	1.39758e-06	0.136715	0.231	0.164	0.051153
JUP	1.42795e-06	0.151695	0.152	0.099	0.0522645
LSR	1.44707e-06	0.237887	0.305	0.236	0.0529642
KIAA1211L	1.477e-06	0.128897	0.086	0.048	0.0540596
SYNPO	1.48357e-06	0.173483	0.249	0.179	0.0543001
TMOD3	1.51487e-06	-0.202777	0.622	0.682	0.0554457
CYBA	1.51625e-06	0.124153	0.14	0.089	0.0554961
GATA6	1.53462e-06	-0.112108	0.02	0.059	0.0561688
LAP3	1.57315e-06	0.266748	0.446	0.381	0.0575788
ITSN1	1.59078e-06	-0.102268	0.036	0.082	0.0582241
H3F3A	1.59571e-06	0.170036	0.946	0.949	0.0584045
SNRPF	1.61345e-06	-0.215827	0.442	0.515	0.0590538
PDE4B	1.7139e-06	0.147867	0.166	0.11	0.0627303
FYN	1.7495e-06	0.188919	0.294	0.223	0.0640333
CDON	1.76784e-06	-0.113095	0.02	0.059	0.0647049
NPM1	1.83502e-06	-0.181225	0.759	0.813	0.0671635
CD55	1.87458e-06	-0.204475	0.232	0.301	0.0686116
ANXA3	1.95091e-06	-0.109698	0.022	0.062	0.0714052
TSPAN12	2.02981e-06	-0.192172	0.154	0.22	0.0742932
KIAA0040	2.03287e-06	0.168982	0.16	0.107	0.0744049
BTBD3	2.03377e-06	0.102833	0.103	0.06	0.0744379
HACE1	2.10503e-06	0.124028	0.096	0.055	0.0770461
EPN2	2.14644e-06	0.142326	0.232	0.167	0.078562
BRI3	2.16457e-06	-0.170416	0.689	0.748	0.0792255
COX17	2.17835e-06	0.189225	0.385	0.308	0.0797296
CALR	2.1851e-06	0.237887	0.671	0.623	0.079977
HTRA1	2.19135e-06	0.259664	0.359	0.288	0.0802058
TIAM1	2.20494e-06	-0.122052	0.072	0.128	0.0807028
ETHE1	2.20581e-06	-0.15065	0.128	0.193	0.0807349
JUN	2.21111e-06	-0.181666	0.903	0.926	0.080929
PLS3	2.2279e-06	0.252715	0.434	0.357	0.0815435
FLI1	2.24185e-06	-0.170657	0.281	0.359	0.0820541
ATP1A1	2.27234e-06	-0.219019	0.409	0.489	0.0831701
FKBP1A	2.27338e-06	-0.155466	0.755	0.804	0.0832079
RNF19A	2.28317e-06	0.246047	0.312	0.241	0.0835664
OTULINL	2.31207e-06	-0.137818	0.055	0.107	0.084624
HLA-DRA	2.32819e-06	-0.217346	0.854	0.91	0.0852142
ALDH2	2.35114e-06	-0.139959	0.12	0.187	0.0860541
RHOC	2.62854e-06	0.207343	0.638	0.586	0.0962071
C9orf16	2.65991e-06	-0.223029	0.501	0.58	0.0973553
GRB10	2.66341e-06	0.214853	0.244	0.179	0.0974836
GNG10	2.685e-06	0.162952	0.341	0.269	0.0982736
CAST	2.73453e-06	-0.185711	0.804	0.848	0.100087
PROX1	2.81377e-06	-0.140326	0.096	0.156	0.102987
TNFAIP2	2.83457e-06	0.119707	0.128	0.081	0.103748
F2R	2.84843e-06	-0.18225	0.139	0.205	0.104255
SOS1	3.00481e-06	0.145867	0.183	0.125	0.109979
H2AFZ	3.04162e-06	0.214353	0.555	0.488	0.111326
REEP3	3.12035e-06	0.146503	0.195	0.136	0.114208
KDELR1	3.276e-06	-0.176121	0.429	0.499	0.119905
LIMA1	3.28261e-06	-0.200025	0.375	0.452	0.120147
CTNNAL1	3.37704e-06	-0.216298	0.235	0.303	0.123603
SLC26A2	3.41587e-06	0.122225	0.115	0.071	0.125024
SNRPD2	3.45992e-06	-0.206146	0.559	0.618	0.126637
GSTK1	3.48941e-06	-0.173837	0.369	0.449	0.127716
LEPR	3.4984e-06	0.180881	0.268	0.201	0.128045
PTPN12	3.5202e-06	0.206934	0.477	0.411	0.128843
CRIP2	3.60468e-06	0.202859	0.808	0.793	0.131935
PITPNC1	3.66019e-06	0.149392	0.195	0.136	0.133966
CARMIL1	3.76572e-06	-0.129086	0.038	0.082	0.137829
NRP2	3.91834e-06	-0.173837	0.159	0.227	0.143415
CRTAP	4.04567e-06	-0.206775	0.346	0.419	0.148075
ADAM15	4.11824e-06	-0.209806	0.53	0.602	0.150732
TPST2	4.22329e-06	-0.165963	0.167	0.233	0.154576
ARL4C	4.25547e-06	-0.166778	0.084	0.139	0.155754
LINC01013	4.27213e-06	0.240729	0.136	0.09	0.156364
PNPLA2	4.397e-06	-0.182864	0.207	0.278	0.160934
CD14	4.64696e-06	-0.163648	0.089	0.145	0.170083
ADAMTS9	4.70249e-06	0.128987	0.128	0.082	0.172116
C1orf21	4.78412e-06	0.289053	0.387	0.32	0.175104
KLHL3	4.78715e-06	-0.131616	0.051	0.099	0.175214
GNA13	4.80583e-06	0.139761	0.118	0.074	0.175898
MIR4435-2HG	4.9148e-06	0.103389	0.093	0.054	0.179887
CRIM1	4.92585e-06	-0.169233	0.477	0.546	0.180291
SIRPA	5.0565e-06	-0.111318	0.043	0.089	0.185073
TM6SF1	5.16522e-06	-0.148075	0.04	0.083	0.189052
MT1X	5.17248e-06	-0.382536	0.192	0.26	0.189318
ATP6V0E1	5.31065e-06	-0.193886	0.49	0.563	0.194375
GPM6A	5.4029e-06	-0.127253	0.023	0.061	0.197751
SHISA2	5.71557e-06	-0.101241	0.013	0.045	0.209196
NMB	6.4564e-06	0.107073	0.076	0.042	0.236311
CLIC2	6.81159e-06	-0.172811	0.205	0.272	0.249311
SKIL	6.87133e-06	-0.172949	0.202	0.269	0.251497
EDF1	6.90201e-06	-0.181435	0.703	0.764	0.252621
RNF166	6.97256e-06	0.104783	0.082	0.046	0.255203
UXT	7.07175e-06	-0.154444	0.427	0.506	0.258833
CCN2	7.38686e-06	0.266808	0.836	0.794	0.270366
AL445524.1	7.49567e-06	0.154528	0.126	0.081	0.274349
SOX4	7.74038e-06	-0.248616	0.281	0.345	0.283306
MYEF2	7.85814e-06	-0.117934	0.027	0.065	0.287616
CDH5	8.11878e-06	0.207633	0.498	0.429	0.297155
SDF2L1	8.18469e-06	0.169107	0.202	0.144	0.299568
CFI	8.4188e-06	-0.179786	0.265	0.333	0.308136
SLC38A2	8.69297e-06	-0.18845	0.344	0.416	0.318171
DNAJB1	8.85848e-06	-0.318903	0.282	0.35	0.324229
GIMAP6	8.91908e-06	-0.184672	0.355	0.425	0.326447
BMPR2	9.11934e-06	-0.216178	0.423	0.489	0.333777
CPXM2	9.45364e-06	-0.171993	0.118	0.178	0.346013
LPAR6	9.87127e-06	0.21548	0.438	0.367	0.361298
RBM6	1.01709e-05	0.156613	0.197	0.141	0.372267
HEBP2	1.04703e-05	-0.191108	0.35	0.424	0.383224
NEURL1B	1.08151e-05	0.172146	0.161	0.111	0.395845
GIMAP2	1.12363e-05	-0.139432	0.093	0.148	0.411261
IGFBP7	1.12761e-05	0.268761	0.977	0.971	0.412717
WLS	1.21317e-05	-0.151943	0.112	0.169	0.444034
SERPINH1	1.2379e-05	0.163094	0.296	0.232	0.453085
GNAL	1.24205e-05	-0.128701	0.031	0.07	0.454603
ITPR1	1.26067e-05	-0.162166	0.112	0.167	0.461419
CXCL11	1.32714e-05	0.295328	0.033	0.013	0.485747
EIF4G2	1.41688e-05	0.195718	0.585	0.513	0.518591
C1QTNF1	1.44989e-05	-0.1558	0.071	0.12	0.530674
NFAT5	1.48222e-05	-0.169527	0.2	0.263	0.542508
FKBP11	1.48616e-05	-0.196935	0.119	0.174	0.543949
LINC02147	1.50398e-05	-0.105547	0.019	0.052	0.55047
LPCAT4	1.50916e-05	-0.104848	0.044	0.087	0.552368
SERP1	1.51795e-05	-0.197899	0.329	0.396	0.555586
UGP2	1.53518e-05	-0.227867	0.282	0.344	0.56189
HLA-F	1.60789e-05	0.228676	0.524	0.46	0.588505
NBL1	1.67268e-05	-0.183495	0.305	0.373	0.612216
CD47	1.73671e-05	-0.181896	0.167	0.226	0.635653
MYO5A	1.74462e-05	0.143656	0.186	0.132	0.638548
IFIT5	1.76448e-05	0.112768	0.138	0.092	0.645817
SCN3B	1.82112e-05	-0.104766	0.036	0.076	0.66655
LY96	1.90956e-05	-0.137233	0.119	0.176	0.698919
HLF	1.92823e-05	0.104464	0.094	0.058	0.705752
CD74	1.96143e-05	-0.167248	0.986	0.992	0.717902
XIST	2.01376e-05	-0.169026	0.005	0.03	0.737056
EPHB4	2.02729e-05	-0.156486	0.217	0.283	0.74201
TMBIM1	2.06749e-05	-0.122896	0.224	0.29	0.756722
AKAP12	2.08225e-05	-0.201373	0.113	0.17	0.762124
CYTL1	2.12608e-05	0.391693	0.275	0.22	0.778168
GPR4	2.24373e-05	0.100147	0.058	0.031	0.821228
ENY2	2.32653e-05	-0.167389	0.459	0.529	0.851532
SLC2A4RG	2.34639e-05	-0.15234	0.159	0.217	0.858802
SUN2	2.39199e-05	-0.171782	0.221	0.288	0.875493
MMRN2	2.40294e-05	-0.15417	0.502	0.573	0.879499
RAPGEF1	2.46186e-05	0.164299	0.221	0.166	0.901066
PTPN14	2.49101e-05	0.196707	0.205	0.153	0.911734
EHD4	2.49925e-05	0.183792	0.403	0.335	0.914752
TMEM173	2.52265e-05	-0.19341	0.401	0.471	0.923313
FHL1	2.54191e-05	0.133654	0.169	0.12	0.930365
DDX52	2.56823e-05	0.133436	0.189	0.135	0.939997
EGLN1	2.62759e-05	0.21947	0.34	0.273	0.961722
HIGD2A	2.6622e-05	-0.218258	0.282	0.343	0.974393
PARVB	2.66844e-05	-0.141178	0.191	0.252	0.976676
ICAM2	2.73512e-05	0.14717	0.484	0.412	1
ANXA4	2.7543e-05	-0.175769	0.205	0.267	1
HEXIM1	2.7559e-05	0.13319	0.195	0.141	1
NEDD9	2.75654e-05	0.209443	0.338	0.274	1
HSPA8	2.80309e-05	-0.180512	0.642	0.695	1
UPP1	2.82501e-05	-0.156588	0.233	0.299	1
FAM214A	2.83952e-05	0.138438	0.142	0.098	1
BCR	2.84936e-05	-0.161361	0.14	0.197	1
TUBA1C	2.86282e-05	0.121295	0.191	0.139	1
THBS1	2.8705e-05	0.144851	0.106	0.068	1
GRK2	2.88335e-05	0.115287	0.162	0.113	1
EID1	2.89735e-05	-0.157072	0.678	0.739	1
CAMLG	2.96306e-05	-0.165582	0.352	0.418	1
PIEZO1	2.99215e-05	-0.178675	0.145	0.201	1
CYB5A	3.00028e-05	0.110124	0.34	0.27	1
PYCARD	3.00542e-05	-0.123351	0.125	0.181	1
LAPTM5	3.02171e-05	-0.158447	0.076	0.124	1
EBPL	3.0228e-05	-0.14852	0.256	0.324	1
SDCBP	3.04335e-05	-0.181176	0.564	0.634	1
DAD1	3.06518e-05	0.196884	0.634	0.584	1
EPSTI1	3.11873e-05	0.104361	0.112	0.072	1
ADGRG1	3.13807e-05	0.144346	0.216	0.16	1
MSRB3	3.14368e-05	-0.177683	0.307	0.374	1
PTK2B	3.21117e-05	-0.111785	0.097	0.149	1
LZTS2	3.31263e-05	0.110063	0.159	0.109	1
BMI1	3.43078e-05	0.144768	0.172	0.123	1
GLS	3.47124e-05	-0.169156	0.239	0.304	1
WNK1	3.59178e-05	-0.193902	0.436	0.499	1
HMGB2	3.67731e-05	-0.168271	0.255	0.322	1
ZCCHC24	3.75903e-05	-0.103106	0.047	0.088	1
ARHGAP18	3.8186e-05	0.18	0.176	0.128	1
SMAD1	3.82566e-05	0.222014	0.538	0.465	1
RHOU	3.8468e-05	-0.181531	0.111	0.163	1
IFITM1	3.99303e-05	0.158439	0.413	0.342	1
ATP13A2	4.04595e-05	0.103172	0.077	0.045	1
KCNB1	4.05702e-05	0.147003	0.058	0.032	1
VAMP3	4.09555e-05	-0.149741	0.358	0.419	1
AKIRIN1	4.09587e-05	0.123536	0.164	0.116	1
S100A16	4.12719e-05	0.194858	0.629	0.578	1
USP12	4.20455e-05	0.162959	0.2	0.148	1
SERPINE1	4.21477e-05	-0.231418	0.089	0.137	1
TLNRD1	4.36355e-05	-0.145351	0.11	0.16	1
KIF1B	4.43901e-05	0.136174	0.141	0.097	1
ASAP2	4.56603e-05	0.147325	0.193	0.142	1
CXCL10	4.57469e-05	0.681766	0.027	0.011	1
CMTM8	4.58863e-05	0.12623	0.286	0.222	1
BTF3	4.6352e-05	-0.135284	0.889	0.921	1
RHEB	5.0369e-05	0.160186	0.307	0.244	1
ZFP36	5.15882e-05	-0.172402	0.661	0.735	1
PLAC9	5.23371e-05	-0.167912	0.218	0.279	1
EEPD1	5.39065e-05	0.109272	0.078	0.047	1
NDUFS5	5.54732e-05	-0.146705	0.507	0.577	1
ATP5MC3	5.70646e-05	0.17001	0.359	0.299	1
FZD4	5.73349e-05	-0.176206	0.1	0.147	1
TYMP	5.79438e-05	0.273131	0.385	0.328	1
PKIG	5.80418e-05	0.125865	0.328	0.264	1
PRPF6	6.04202e-05	-0.144953	0.341	0.41	1
ATP6V0B	6.12261e-05	0.198581	0.401	0.335	1
TNFAIP1	6.14162e-05	0.151253	0.275	0.216	1
CFH	6.24103e-05	-0.176389	0.099	0.149	1
HCP5	6.35402e-05	0.127991	0.16	0.113	1
MEOX1	6.43142e-05	-0.109436	0.296	0.366	1
PDE2A	6.46617e-05	-0.195671	0.255	0.321	1
RPS27L	6.47033e-05	-0.171778	0.502	0.564	1
AK4	6.6827e-05	-0.133416	0.094	0.142	1
AC097534.2	6.77001e-05	-0.109435	0.099	0.148	1
PLPP3	6.88545e-05	0.11901	0.16	0.113	1
FBL	7.02164e-05	-0.17142	0.414	0.467	1
CHD9	7.07182e-05	-0.17279	0.336	0.401	1
VEGFB	7.07762e-05	-0.138509	0.15	0.205	1
DDT	7.1818e-05	-0.158264	0.361	0.424	1
NUCB2	7.28783e-05	0.222752	0.403	0.343	1
VAT1	7.35114e-05	-0.133546	0.239	0.298	1
CCSER2	7.56534e-05	0.133579	0.214	0.161	1
OSTF1	7.56813e-05	0.104726	0.176	0.127	1
DHRS7B	7.6273e-05	0.108225	0.135	0.093	1
GMDS	7.68722e-05	-0.118975	0.093	0.142	1
GASK1B	7.83455e-05	0.223875	0.308	0.251	1
CCDC69	7.94443e-05	-0.126812	0.352	0.42	1
MYO1E	8.27997e-05	0.122584	0.129	0.087	1
CD79B	8.67446e-05	0.146927	0.246	0.19	1
PDLIM7	8.88596e-05	-0.115243	0.09	0.135	1
CHKA	8.88999e-05	0.105057	0.103	0.067	1
RAD9A	8.93788e-05	0.10968	0.118	0.079	1
OTULIN	9.06166e-05	0.108135	0.135	0.094	1
NPHP3	9.07994e-05	-0.150711	0.071	0.113	1
GLRX	9.10511e-05	0.155205	0.189	0.14	1
CXCL9	9.40333e-05	0.933124	0.026	0.01	1
SLFN5	9.63076e-05	0.175627	0.421	0.353	1
RHOA	9.87475e-05	0.153083	0.786	0.754	1
C12orf57	9.88817e-05	0.165271	0.545	0.483	1
TNFAIP8L1	9.95269e-05	0.178533	0.231	0.18	1
HOXD10	0.000101314	0.145026	0.141	0.099	1
CYTH1	0.000102092	-0.163886	0.19	0.246	1
S100A13	0.000103014	-0.154706	0.762	0.798	1
EIF2A	0.000105087	-0.111098	0.26	0.325	1
TMBIM4	0.000107663	-0.122673	0.495	0.577	1
UVRAG	0.000107925	0.144767	0.233	0.181	1
PDK4	0.000110407	-0.167827	0.091	0.136	1
EPHX1	0.000111191	0.205589	0.28	0.226	1
SMARCA5	0.00011705	0.16658	0.319	0.259	1
FOXP1	0.000117756	-0.169582	0.593	0.655	1
RAPGEF2	0.000118506	0.115733	0.169	0.122	1
SPAG7	0.00012111	-0.114423	0.182	0.24	1
NUDT4	0.000121193	-0.177196	0.105	0.151	1
KRT8	0.000123787	-0.130472	0.143	0.197	1
HYI	0.000127398	-0.148416	0.08	0.123	1
PMAIP1	0.000128339	-0.128422	0.04	0.075	1
GIMAP1	0.000129523	-0.155406	0.543	0.599	1
PCMTD2	0.000131263	0.168409	0.238	0.186	1
PTTG1IP	0.00013166	-0.157242	0.529	0.592	1
MFNG	0.00013182	-0.148401	0.178	0.234	1
SVIL	0.000132986	0.159125	0.255	0.202	1
SERF2	0.000134664	-0.126858	0.897	0.931	1
HIPK2	0.000136175	0.110597	0.093	0.06	1
RPS4Y1	0.000139507	-0.158817	0.768	0.8	1
HHEX	0.000141267	-0.15708	0.217	0.276	1
ANXA1	0.000142492	-0.168548	0.702	0.767	1
CCDC3	0.000145831	-0.118182	0.33	0.397	1
C12orf10	0.000148337	-0.12346	0.21	0.266	1
NKTR	0.000149389	-0.156349	0.361	0.424	1
DIAPH2	0.000150473	0.139544	0.27	0.214	1
HADHA	0.000152409	-0.167062	0.387	0.446	1
DNASE1L1	0.000152859	-0.11597	0.069	0.11	1
PNN	0.000154993	-0.144081	0.234	0.298	1
RASSF8	0.00015735	-0.13221	0.086	0.129	1
TRAPPC5	0.000164355	-0.135508	0.312	0.374	1
MAP4K4	0.000165716	0.189343	0.323	0.264	1
CALD1	0.000166933	0.165637	0.571	0.525	1
PRPSAP1	0.000171251	-0.158848	0.224	0.276	1
SCAMP2	0.000174727	-0.139367	0.136	0.187	1
FSCN1	0.000176395	0.126114	0.15	0.108	1
ITGA2	0.000178511	-0.123741	0.092	0.137	1
CALML4	0.000183984	-0.118622	0.094	0.14	1
SMARCA2	0.000185505	0.179269	0.302	0.245	1
HACD3	0.0001861	0.168337	0.275	0.217	1
USP46	0.000188518	0.101458	0.066	0.04	1
SUSD6	0.000188916	0.133754	0.106	0.071	1
ABHD17A	0.000189409	0.144368	0.376	0.315	1
ADD1	0.000193132	-0.151196	0.262	0.32	1
COPRS	0.000203118	-0.136475	0.178	0.232	1
B3GNT2	0.000203603	0.136624	0.297	0.24	1
JAK1	0.000205777	0.211115	0.601	0.561	1
PTGS2	0.000207242	-0.271573	0.047	0.081	1
STOM	0.000210547	-0.125094	0.533	0.593	1
PLEC	0.000218334	-0.183655	0.414	0.471	1
CBR3	0.000232242	-0.127874	0.155	0.207	1
MALL	0.000235053	-0.125285	0.272	0.329	1
ATP5MPL	0.000236911	-0.10751	0.478	0.541	1
TMA7	0.000241352	-0.156568	0.725	0.769	1
RBFOX2	0.000251889	0.13321	0.188	0.141	1
FAM210B	0.000255213	-0.154329	0.175	0.225	1
CRIP1	0.000258067	0.186344	0.745	0.723	1
RAB13	0.000261933	0.231119	0.738	0.71	1
RAB34	0.000265316	0.101621	0.149	0.107	1
ENSA	0.000270064	-0.103727	0.355	0.416	1
TAP2	0.000271634	0.129552	0.195	0.146	1
UBE2D1	0.000275437	0.101438	0.132	0.092	1
ARPC5	0.000277006	0.1998	0.469	0.408	1
ILK	0.000283538	0.13372	0.239	0.188	1
BCAM	0.000287479	-0.138605	0.672	0.722	1
IRF9	0.000291209	0.158294	0.274	0.221	1
LMCD1	0.000292665	-0.145115	0.6	0.65	1
JMJD1C	0.000302214	0.187695	0.339	0.284	1
TUBB4B	0.000309191	-0.165302	0.466	0.534	1
GDI2	0.000310986	-0.13968	0.345	0.397	1
IL33	0.000314025	-0.10932	0.494	0.556	1
BLCAP	0.000324573	-0.115338	0.09	0.131	1
MAGI1	0.000327047	0.196205	0.357	0.305	1
HSF1	0.000329579	-0.129299	0.12	0.165	1
FERMT2	0.000357038	0.119898	0.261	0.208	1
NUCB1	0.000359334	-0.123007	0.422	0.49	1
ITPRIP	0.000363784	0.106353	0.089	0.058	1
ZNF160	0.000382964	0.170551	0.153	0.113	1
ATP5PD	0.000388095	-0.128259	0.408	0.469	1
KLF10	0.000390092	-0.185112	0.376	0.433	1
IGFBP3	0.000394614	-0.366506	0.152	0.108	1
SLC3A2	0.000408709	-0.157023	0.432	0.49	1
H3F3B	0.000410638	-0.12087	0.952	0.97	1
LINC02185	0.000418638	0.182567	0.259	0.208	1
CDC25B	0.000426646	-0.14126	0.107	0.149	1
MAN1A1	0.00044091	-0.103594	0.142	0.191	1
PARVA	0.000447956	-0.113974	0.121	0.167	1
TUSC3	0.00044799	0.120459	0.113	0.079	1
FGL2	0.000449245	-0.169468	0.227	0.28	1
CMTM6	0.000449878	0.113967	0.206	0.158	1
NFATC2IP	0.000458563	0.10362	0.178	0.135	1
AIG1	0.000474999	-0.149492	0.112	0.154	1
USP53	0.00047622	-0.10778	0.108	0.151	1
AHNAK2	0.000480418	-0.168664	0.174	0.221	1
TNFAIP8	0.000486329	-0.123816	0.093	0.135	1
DOCK11	0.000496923	-0.131145	0.094	0.134	1
FUBP1	0.000501302	0.130827	0.198	0.153	1
TPM4	0.000525044	-0.176623	0.692	0.727	1
KHDRBS1	0.00052687	-0.165029	0.388	0.438	1
BAZ1A	0.000527135	0.107229	0.241	0.19	1
TGFBR2	0.000529277	-0.148424	0.786	0.819	1
IFI16	0.000542772	0.163238	0.726	0.704	1
CD9	0.000548644	0.152411	0.846	0.831	1
BIRC3	0.000552763	-0.131703	0.09	0.129	1
TNFRSF14	0.00055621	-0.106459	0.26	0.314	1
IER5	0.000557278	-0.155413	0.258	0.307	1
IGBP1	0.000564056	-0.179462	0.233	0.282	1
PNRC1	0.000565001	-0.117435	0.688	0.732	1
ITGAE	0.000565774	-0.128754	0.103	0.143	1
LAMP1	0.000566093	-0.130685	0.396	0.456	1
MYL12B	0.000571114	-0.10059	0.816	0.857	1
MFSD6	0.000582492	0.147457	0.181	0.14	1
IL13RA1	0.000590217	-0.144883	0.162	0.207	1
PABPC1	0.000592492	-0.138043	0.742	0.782	1
H1F0	0.000601262	0.122169	0.155	0.115	1
CD34	0.000615328	0.18121	0.872	0.874	1
LRRC75A	0.00061621	-0.126976	0.054	0.088	1
EEF2K	0.000618016	-0.146303	0.145	0.189	1
AGFG2	0.000620538	0.115048	0.094	0.064	1
PAPSS1	0.00062427	0.100989	0.107	0.074	1
ENDOD1	0.000637971	-0.179903	0.227	0.273	1
ARHGAP26	0.000645105	-0.132647	0.118	0.161	1
IER5L	0.000652735	0.104028	0.217	0.168	1
HLA-DRB5	0.000658353	-0.145934	0.524	0.582	1
LAPTM4B	0.000676678	0.139636	0.219	0.176	1
MRPS18B	0.000679895	-0.137395	0.226	0.277	1
TRIR	0.000704329	-0.118134	0.557	0.604	1
GABARAP	0.000711028	-0.14368	0.646	0.695	1
HSPA2	0.000748218	0.148313	0.256	0.208	1
GAS2L1	0.000755488	-0.117202	0.166	0.213	1
CXXC5	0.000762446	0.140844	0.19	0.148	1
CAV2	0.000773192	0.200665	0.578	0.537	1
C1orf115	0.000774303	-0.155415	0.352	0.396	1
CASP3	0.000777213	0.106332	0.12	0.085	1
FDPS	0.00079111	0.19026	0.459	0.406	1
CNN3	0.000799874	-0.132506	0.411	0.458	1
CEBPG	0.000809403	0.103385	0.217	0.17	1
EBF3	0.000821393	-0.102296	0.207	0.258	1
SYNE2	0.000821628	-0.129587	0.697	0.751	1
IMPAD1	0.000861373	0.104741	0.133	0.097	1
FGD5	0.000871133	-0.124336	0.268	0.32	1
IFIT2	0.000884539	0.194023	0.159	0.121	1
BTG2	0.000918264	-0.140617	0.424	0.482	1
EPN1	0.000923116	-0.141633	0.181	0.226	1
UBXN4	0.000947465	0.210106	0.514	0.465	1
CMIP	0.000957585	-0.128065	0.353	0.404	1
MAP3K3	0.000962832	-0.142968	0.189	0.235	1
RAB11FIP5	0.00100824	-0.10441	0.107	0.149	1
AKR1A1	0.00100904	-0.138899	0.221	0.269	1
LTBR	0.00101578	-0.149601	0.217	0.263	1
G3BP1	0.00105064	0.142195	0.33	0.281	1
TMEM14C	0.00107664	-0.144498	0.407	0.461	1
MDFIC	0.00110111	0.107276	0.253	0.204	1
TIMP2	0.0011066	-0.181731	0.443	0.488	1
MAML3	0.00111106	0.100867	0.11	0.077	1
PABPC4	0.00112412	-0.118575	0.196	0.246	1
HSP90AB1	0.00112676	-0.119403	0.932	0.94	1
TEAD1	0.00112954	-0.123856	0.105	0.144	1
PPP1R15A	0.001139	-0.143818	0.499	0.56	1
CCDC80	0.00114752	-0.170333	0.127	0.168	1
MBTPS1	0.00116475	0.142776	0.242	0.196	1
DST	0.00118895	-0.170649	0.125	0.165	1
IQCK	0.00120559	0.143779	0.117	0.085	1
RAI14	0.00121293	-0.163888	0.268	0.316	1
UBXN1	0.00121654	-0.140105	0.543	0.59	1
TOP1	0.00125147	0.194367	0.303	0.259	1
PDIA6	0.00125273	0.199435	0.521	0.478	1
NHSL2	0.00125316	-0.119709	0.156	0.2	1
MMP24OS	0.00126528	-0.16053	0.143	0.183	1
PYURF	0.00126533	0.138178	0.424	0.372	1
BMERB1	0.00128698	0.137043	0.196	0.155	1
SLC36A4	0.0012886	0.126527	0.091	0.063	1
TAF11	0.00128925	0.125898	0.267	0.218	1
EIF5A2	0.00131314	0.1204	0.07	0.046	1
EPB41L4A-AS1	0.00132421	-0.147095	0.339	0.388	1
SEC61B	0.00132585	0.184055	0.596	0.555	1
TMEM219	0.00134039	-0.137511	0.387	0.436	1
COPS9	0.00134395	-0.145328	0.479	0.519	1
LAMB2	0.00139879	-0.144827	0.255	0.303	1
CCNL1	0.00149634	-0.228307	0.448	0.491	1
PSMB2	0.00149991	0.134883	0.311	0.259	1
TNFRSF6B	0.00150017	0.180018	0.16	0.123	1
ANXA5	0.00150224	0.145009	0.563	0.518	1
PLK2	0.00151796	0.153555	0.417	0.37	1
VTI1B	0.0015327	-0.13684	0.166	0.208	1
RB1	0.00153773	0.136292	0.228	0.185	1
SDAD1	0.00153901	-0.119496	0.111	0.15	1
ZFAND5	0.00159095	0.175855	0.36	0.31	1
FAM89B	0.00159171	-0.109082	0.207	0.255	1
TNRC6A	0.0016078	-0.126957	0.224	0.273	1
CA5B	0.00161117	0.104142	0.164	0.126	1
CIRBP	0.00162088	-0.15474	0.688	0.732	1
LRP5	0.00162333	-0.134666	0.098	0.134	1
ABL2	0.00163951	0.112299	0.128	0.094	1
NR2F6	0.00165242	-0.104053	0.071	0.105	1
CD93	0.00165944	0.162725	0.538	0.495	1
RESF1	0.0016598	0.165963	0.346	0.295	1
PHF20L1	0.00167977	0.126505	0.247	0.199	1
TP53TG1	0.00172559	-0.146501	0.145	0.185	1
UBE2A	0.00172645	0.104522	0.169	0.131	1
N4BP2L1	0.00174058	0.137735	0.142	0.107	1
ST6GALNAC6	0.00175125	-0.109764	0.134	0.175	1
HIF1A	0.00178937	0.175353	0.283	0.236	1
PDCD4	0.00182741	0.138385	0.524	0.48	1
DUSP6	0.00186138	0.118151	0.256	0.211	1
YES1	0.0018796	0.114653	0.323	0.27	1
SMARCD1	0.00191146	0.123772	0.181	0.141	1
MSN	0.0019369	0.123331	0.573	0.528	1
RAB11FIP2	0.00194774	0.105112	0.079	0.054	1
RNF13	0.00197758	-0.1124	0.284	0.332	1
CHRAC1	0.00198711	0.123735	0.219	0.175	1
CDC42EP2	0.0020304	-0.116863	0.097	0.133	1
TCEAL4	0.00203455	-0.116168	0.505	0.546	1
CORO1C	0.00203823	-0.122472	0.148	0.187	1
PNPLA8	0.00203892	0.121077	0.168	0.131	1
VAPA	0.00206678	0.141227	0.503	0.452	1
USP31	0.00211041	0.144487	0.076	0.051	1
MTERF4	0.00214485	0.131591	0.115	0.084	1
LIMS2	0.00214681	-0.125983	0.334	0.381	1
WAC-AS1	0.00215467	-0.116017	0.076	0.109	1
DUSP1	0.0021642	-0.137662	0.819	0.859	1
HEG1	0.00219111	-0.106616	0.42	0.469	1
TACR1	0.0022176	0.13004	0.256	0.211	1
IFNGR1	0.00222034	0.16412	0.296	0.251	1
SLC35G2	0.0022862	0.112992	0.094	0.067	1
OAZ2	0.0022965	0.135427	0.27	0.226	1
ETFB	0.00231674	-0.100687	0.234	0.284	1
ASPH	0.00237568	-0.133583	0.277	0.322	1
C8orf33	0.00240872	0.109966	0.301	0.251	1
LTBP3	0.00241035	-0.102583	0.122	0.161	1
POLR2I	0.00241425	-0.127252	0.361	0.406	1
RAB22A	0.0024187	0.102893	0.178	0.14	1
HNRNPA2B1	0.00248258	0.153719	0.749	0.747	1
PDCD6IP	0.00250383	-0.12498	0.219	0.261	1
ERG	0.00250523	0.143119	0.395	0.347	1
IGF2R	0.00250836	0.104303	0.132	0.099	1
SYF2	0.00256888	-0.11656	0.597	0.641	1
PFKP	0.00257457	-0.101798	0.193	0.24	1
ACTR2	0.00267839	0.150701	0.493	0.448	1
HLA-DQA1	0.00271262	-0.145636	0.241	0.288	1
EGLN2	0.00272852	-0.130665	0.223	0.263	1
TIMM10	0.00272973	-0.102163	0.162	0.202	1
FEZ2	0.00277634	0.139401	0.372	0.326	1
CCNY	0.00278405	0.111725	0.274	0.226	1
FXR1	0.00279146	-0.137899	0.431	0.476	1
FBXO34	0.00283673	-0.109228	0.105	0.14	1
SNHG16	0.00284625	-0.127323	0.376	0.421	1
PPIA	0.00292602	-0.140921	0.888	0.917	1
NDUFA11	0.00300773	-0.109762	0.502	0.552	1
ATP2B1	0.00301839	-0.101409	0.304	0.354	1
CAMTA1	0.0030521	-0.122978	0.267	0.312	1
CALU	0.00306119	0.110228	0.325	0.273	1
GSTP1	0.00308026	-0.110602	0.723	0.769	1
PLCG2	0.00312803	0.114202	0.119	0.089	1
JAG1	0.00320348	-0.132293	0.148	0.185	1
CD2AP	0.00324947	0.132554	0.291	0.245	1
RNF115	0.00330903	-0.100966	0.211	0.253	1
DHRS3	0.00332976	0.108091	0.114	0.085	1
NUDT14	0.00333522	0.128508	0.234	0.193	1
RASA4	0.00334246	-0.160178	0.128	0.164	1
MVP	0.00335515	-0.115333	0.218	0.262	1
SEC11A	0.00337093	-0.106405	0.629	0.678	1
DGKH	0.00337556	0.125126	0.15	0.117	1
IL6	0.00346858	-0.10971	0.029	0.051	1
ADM5	0.00358287	0.128608	0.282	0.238	1
DDX5	0.00363629	0.127886	0.893	0.891	1
SNRPB	0.00366805	0.206113	0.507	0.482	1
RBIS	0.00372664	-0.108347	0.399	0.447	1
NAA38	0.00377324	0.110063	0.59	0.544	1
POSTN	0.00382618	0.111746	0.166	0.211	1
LITAF	0.0038551	0.117237	0.175	0.139	1
PDLIM2	0.00386719	0.106411	0.185	0.147	1
VCL	0.00391599	0.143998	0.182	0.147	1
CDH13	0.00393137	0.149037	0.491	0.438	1
PPP2R5A	0.00398256	-0.112455	0.179	0.221	1
ARF4	0.00412102	0.128557	0.26	0.22	1
MT-CO3	0.00412763	-0.128845	0.992	0.993	1
RALY	0.00413212	-0.135749	0.315	0.357	1
ARPC4	0.00413383	-0.12649	0.326	0.369	1
TWF2	0.0041369	-0.118471	0.128	0.164	1
AP1S2	0.00415773	0.192827	0.499	0.465	1
CHD2	0.00419355	0.146169	0.228	0.187	1
PCYOX1	0.0042224	-0.112489	0.148	0.185	1
SERTAD4-AS1	0.00424893	0.180298	0.336	0.293	1
TM4SF1	0.00430471	0.240801	0.899	0.894	1
CCL2	0.00433625	-0.542446	0.197	0.238	1
SNRNP200	0.00435294	0.116708	0.241	0.199	1
MAP1LC3B	0.00447315	0.185362	0.583	0.555	1
PCSK7	0.00450501	0.123472	0.14	0.109	1
MESD	0.00452847	-0.102086	0.241	0.283	1
THAP12	0.00460813	0.103914	0.199	0.16	1
DDX21	0.00469084	0.149345	0.463	0.425	1
BCAP31	0.0047487	-0.125487	0.399	0.438	1
RASAL2	0.00486939	0.137599	0.287	0.245	1
SEPTIN10	0.00496871	-0.108236	0.36	0.396	1
RIT1	0.00498355	0.101885	0.148	0.116	1
NME1	0.00499219	0.159617	0.179	0.143	1
HERC1	0.00507333	0.129697	0.183	0.148	1
GPR146	0.00522243	0.104899	0.251	0.213	1
NR5A2	0.00527217	0.121576	0.138	0.107	1
UBE2R2	0.00529144	-0.103077	0.249	0.292	1
CNRIP1	0.00532906	0.123538	0.203	0.166	1
APLNR	0.00537469	-0.111708	0.153	0.191	1
RIOK3	0.00539858	-0.100911	0.155	0.194	1
MTPN	0.00541187	0.160824	0.472	0.431	1
EIF2AK2	0.00543858	0.109236	0.318	0.277	1
FNBP1	0.00545718	-0.105587	0.129	0.164	1
ROCK2	0.00550977	0.112998	0.354	0.308	1
NDUFB4	0.00558318	-0.118713	0.523	0.564	1
TMEM179B	0.00566997	-0.111954	0.301	0.341	1
HEXA	0.00576916	-0.123797	0.196	0.235	1
ZBTB20	0.00584406	-0.132554	0.413	0.451	1
PPP1R12A	0.00585873	0.145763	0.393	0.348	1
CHID1	0.00589005	-0.111101	0.082	0.111	1
MAPRE1	0.00592989	0.105798	0.177	0.144	1
VBP1	0.00597334	0.101266	0.142	0.112	1
SERTAD2	0.00599936	-0.132008	0.159	0.195	1
MT-CO2	0.00601285	-0.125778	0.993	0.995	1
IFI44	0.00602258	0.120399	0.217	0.179	1
SMC1A	0.00608784	0.111536	0.186	0.151	1
SAT2	0.00625037	-0.123908	0.242	0.281	1
COX7C	0.0062557	-0.138766	0.765	0.803	1
MOB2	0.00629488	-0.111505	0.329	0.367	1
PSMC5	0.0063967	-0.120143	0.323	0.362	1
HIVEP1	0.00640483	-0.105322	0.131	0.165	1
PSENEN	0.00642865	-0.11224	0.176	0.212	1
TBX1	0.00645737	-0.148068	0.31	0.351	1
TUG1	0.00650038	0.117418	0.177	0.143	1
LARS	0.00657834	0.136774	0.332	0.288	1
GADD45A	0.00659146	0.110071	0.357	0.312	1
PDHB	0.00662822	0.106558	0.203	0.167	1
PSMB10	0.00670066	-0.131777	0.183	0.219	1
PPP1R11	0.00670868	0.121374	0.138	0.108	1
ATRAID	0.00673273	-0.114743	0.338	0.377	1
SMIM7	0.00678222	-0.120656	0.196	0.232	1
DNAJB6	0.00686455	0.182408	0.369	0.333	1
CYYR1	0.00696065	0.172156	0.544	0.505	1
SMDT1	0.00701204	-0.108277	0.427	0.462	1
HSP90B1	0.00702767	0.172713	0.716	0.701	1
MRTFB	0.00707591	0.164694	0.517	0.479	1
KRT18	0.00712031	-0.100727	0.186	0.225	1
POLK	0.00716825	-0.100563	0.127	0.161	1
ERF	0.00719959	0.133388	0.233	0.197	1
ZHX3	0.00719974	0.116922	0.107	0.081	1
RSL24D1	0.00724437	-0.124695	0.444	0.49	1
CHURC1	0.0073796	-0.108437	0.503	0.55	1
NUCKS1	0.00738819	-0.113448	0.752	0.79	1
ANAPC11	0.00753413	0.119322	0.388	0.346	1
DAPK3	0.00754546	0.109853	0.146	0.115	1
BAG3	0.00754565	0.100531	0.207	0.173	1
TLE4	0.00763638	-0.124709	0.148	0.183	1
DEPP1	0.00777088	-0.135128	0.374	0.424	1
MED1	0.00778123	0.110784	0.143	0.113	1
NECTIN2	0.00778757	0.129431	0.414	0.371	1
RALGDS	0.00781956	-0.133107	0.26	0.298	1
MAP3K11	0.00791677	-0.126162	0.297	0.331	1
SAP30BP	0.00813153	0.119013	0.277	0.235	1
CSGALNACT1	0.00815539	0.127303	0.321	0.278	1
DPYSL3	0.00824646	0.142166	0.282	0.243	1
MX1	0.00825954	0.237132	0.289	0.258	1
OCIAD2	0.00826782	-0.123829	0.277	0.315	1
ACTR3	0.00829046	0.129359	0.318	0.278	1
RSBN1L	0.00851623	0.12051	0.248	0.209	1
RBPMS	0.00853881	0.115705	0.272	0.234	1
PCMTD1	0.00874103	0.111542	0.408	0.36	1
DTNBP1	0.00911216	-0.110443	0.083	0.11	1
CDV3	0.00939512	-0.112733	0.432	0.47	1
EEA1	0.00959049	-0.116795	0.212	0.25	1
PNISR	0.00974237	-0.101946	0.396	0.433	1
LAMC1	0.00990794	0.112407	0.336	0.299	1
DHX36	0.0101379	0.115065	0.334	0.292	1
HOXD8	0.0102866	0.111773	0.284	0.243	1
EVL	0.0103166	-0.122798	0.162	0.196	1
AGRN	0.0103212	-0.101468	0.073	0.099	1
NRARP	0.0104117	0.120811	0.288	0.249	1
PSME1	0.0104778	-0.106747	0.691	0.724	1
CD40	0.0105867	0.10961	0.227	0.19	1
ZNF428	0.0107268	0.10624	0.244	0.205	1
IFI44L	0.0108047	0.201474	0.293	0.26	1
PDLIM5	0.0108586	-0.142015	0.333	0.367	1
SNW1	0.0110314	-0.118446	0.321	0.359	1
CDKN1C	0.0116622	0.151968	0.295	0.259	1
MIDN	0.0116992	0.11674	0.427	0.389	1
TAX1BP1	0.0117327	0.143864	0.409	0.365	1
SELENOM	0.011787	-0.111718	0.519	0.565	1
VPS51	0.0123448	-0.10935	0.286	0.322	1
STAU1	0.0124283	-0.101441	0.333	0.37	1
THUMPD3	0.0124803	0.110789	0.089	0.067	1
EBF1	0.0125338	-0.102916	0.42	0.457	1
ARL6IP4	0.0125974	-0.110146	0.591	0.621	1
CD109	0.0126127	0.20407	0.303	0.271	1
LSM2	0.0127328	-0.140887	0.36	0.391	1
TMEM165	0.0127847	0.141722	0.228	0.197	1
GATAD2A	0.0129634	0.118573	0.171	0.142	1
NBDY	0.0131154	-0.101557	0.263	0.297	1
MT-CYB	0.0131283	-0.127935	0.994	0.997	1
SCARB2	0.01323	-0.121746	0.298	0.339	1
SET	0.0132313	0.105158	0.76	0.744	1
EIF3M	0.0132936	-0.101075	0.308	0.346	1
HLA-DQB1	0.0133173	-0.115395	0.421	0.467	1
MRPL54	0.0135619	-0.114134	0.223	0.256	1
TMF1	0.0135928	0.136988	0.218	0.184	1
SERPINB6	0.0137215	0.174779	0.451	0.409	1
TMCC3	0.0139363	0.150497	0.167	0.136	1
ADAMTS1	0.0139922	-0.124528	0.269	0.305	1
IL3RA	0.0140958	0.125124	0.464	0.426	1
PARP9	0.0146347	0.122223	0.162	0.134	1
NTN4	0.0148819	-0.129722	0.203	0.236	1
MT-CO1	0.0149104	-0.1154	0.992	0.994	1
PPP1R2	0.0150797	0.100586	0.269	0.234	1
TAX1BP3	0.0151047	-0.125515	0.241	0.273	1
ADSS	0.0153572	0.113512	0.275	0.237	1
NDUFA12	0.0155884	0.128854	0.449	0.403	1
MRTO4	0.016048	-0.102475	0.12	0.148	1
NOSTRIN	0.0160549	-0.108909	0.457	0.495	1
CCT2	0.0160791	0.142778	0.268	0.232	1
PRR34-AS1	0.0161089	-0.106387	0.077	0.101	1
EIF3I	0.016241	-0.100857	0.358	0.393	1
TMEM126A	0.0163296	-0.107737	0.115	0.143	1
CXCL2	0.0163538	-0.25339	0.07	0.094	1
FYTTD1	0.0167667	0.12245	0.237	0.202	1
PSMD1	0.0168995	0.130594	0.216	0.185	1
SEC23A	0.0169039	0.10748	0.126	0.1	1
BTBD7	0.0169526	-0.132602	0.168	0.197	1
PROCR	0.0169693	-0.104897	0.094	0.12	1
SSU72	0.0173213	0.118164	0.283	0.246	1
LYPLA1	0.0173541	0.113978	0.219	0.185	1
HSD17B11	0.0175745	-0.123665	0.402	0.432	1
BCAR1	0.0176206	-0.131356	0.128	0.156	1
SERINC3	0.0179913	-0.109471	0.422	0.45	1
ZFYVE16	0.0182514	0.118927	0.16	0.132	1
WSB1	0.0189299	-0.119533	0.365	0.397	1
MYSM1	0.0189847	0.132895	0.127	0.103	1
AHCTF1	0.0194521	0.115097	0.163	0.136	1
DR1	0.0198887	0.111207	0.129	0.104	1
MPHOSPH8	0.0200263	-0.109065	0.39	0.426	1
DNAJC21	0.0203365	0.129506	0.284	0.249	1
ME2	0.0209647	0.101714	0.097	0.075	1
PFDN1	0.0212379	0.111304	0.403	0.363	1
HLA-DPA1	0.0215466	-0.132635	0.691	0.743	1
HMGXB3	0.0218035	0.107207	0.14	0.113	1
PLEKHA1	0.0218063	0.111151	0.225	0.192	1
ELOC	0.0219117	0.12502	0.366	0.329	1
HNRNPR	0.0225057	0.149825	0.403	0.37	1
SDF4	0.0226496	0.109808	0.291	0.259	1
BCAS2	0.0226808	-0.12814	0.156	0.184	1
MAPK3	0.0229527	0.119051	0.35	0.316	1
MPHOSPH10	0.0238041	0.115845	0.265	0.232	1
SEC62	0.024033	0.140124	0.809	0.803	1
PRDX6	0.0244572	-0.119019	0.417	0.442	1
TUBA1A	0.0251041	0.135496	0.514	0.476	1
FRA10AC1	0.0253793	-0.100822	0.141	0.17	1
PHB2	0.0256171	-0.108657	0.317	0.348	1
LRG1	0.0262306	-0.103774	0.04	0.058	1
AHR	0.0267085	0.14216	0.441	0.406	1
YY1	0.0267379	0.119416	0.427	0.387	1
FN1	0.0268818	-0.275647	0.099	0.123	1
U2SURP	0.0270436	-0.110919	0.322	0.353	1
TSNAX	0.0276271	0.113196	0.312	0.277	1
MT-ND3	0.027746	-0.131251	0.987	0.993	1
RAB2A	0.0278015	0.126288	0.53	0.507	1
GATAD1	0.0280214	-0.111876	0.174	0.203	1
MXRA7	0.0282272	0.146553	0.43	0.396	1
WARS	0.0289688	0.13237	0.258	0.226	1
SYNE1	0.028975	-0.10286	0.244	0.275	1
SKP1	0.0296362	0.1049	0.648	0.62	1
PAPOLA	0.030369	0.160837	0.39	0.36	1
NFIB	0.0309519	0.132569	0.677	0.637	1
SPCS3	0.0311694	0.110473	0.434	0.402	1
UBE2G2	0.0328078	0.114194	0.26	0.23	1
PDIA3	0.0338049	0.175738	0.582	0.571	1
ZC3H13	0.0340971	-0.110137	0.366	0.395	1
TMEM123	0.0350655	0.14547	0.438	0.408	1
ODF3B	0.0375263	-0.10888	0.178	0.203	1
PSMA7	0.0376374	0.112295	0.745	0.741	1
PINK1	0.0377936	0.109158	0.184	0.158	1
ASAH1	0.0389209	0.106911	0.22	0.192	1
SKAP2	0.0406919	-0.102864	0.268	0.296	1
SMG1	0.0412753	0.107777	0.204	0.176	1
LRRC8C	0.0417285	0.151735	0.224	0.197	1
MT1E	0.0418053	-0.339891	0.142	0.168	1
ANKRD12	0.0419785	-0.102309	0.535	0.569	1
ARPP19	0.0425038	0.125856	0.319	0.288	1
GPATCH8	0.0440819	-0.116305	0.184	0.207	1
UTRN	0.0442926	-0.111502	0.438	0.469	1
PCGF5	0.0444101	0.114432	0.154	0.131	1
PSMB9	0.0446106	0.132187	0.521	0.498	1
MT1M	0.0452901	0.436918	0.055	0.073	1
GPBP1	0.0453825	0.102655	0.34	0.308	1
PHACTR4	0.0458011	0.105605	0.332	0.3	1
RTN4	0.0462077	0.132016	0.615	0.589	1
COBLL1	0.0479717	0.139162	0.267	0.238	1
NSD1	0.0534473	0.10891	0.168	0.145	1
MPG	0.0534957	-0.10662	0.235	0.26	1
NIBAN2	0.0537	0.103104	0.254	0.225	1
KLF9	0.0540237	-0.104471	0.548	0.577	1
TECR	0.0541305	-0.110901	0.19	0.211	1
ZRANB2	0.0546844	0.127543	0.297	0.267	1
ID3	0.055039	0.166809	0.829	0.845	1
DDX46	0.0550462	0.129399	0.464	0.431	1
FAM133B	0.0552196	0.101633	0.331	0.3	1
POLR2F	0.0565754	0.105636	0.258	0.231	1
YWHAQ	0.0566382	0.119466	0.407	0.383	1
PFN1	0.0575239	0.12595	0.748	0.735	1
DOCK9	0.0602106	0.10777	0.343	0.311	1
FABP4	0.0603348	0.236582	0.056	0.042	1
SFRP2	0.0606009	0.105061	0.001	0	1
ODC1	0.0619585	0.350701	0.256	0.238	1
EPS8	0.064159	0.10233	0.416	0.386	1
PLPP1	0.064391	-0.106508	0.197	0.224	1
SEPTIN7	0.0648056	0.117635	0.755	0.739	1
CARD10	0.0650138	-0.106386	0.153	0.174	1
LIPA	0.0656459	0.100719	0.252	0.228	1
CDC42EP3	0.0679081	0.149378	0.441	0.419	1
DFFA	0.0711382	0.119883	0.131	0.112	1
CRK	0.0730395	0.100991	0.303	0.27	1
ARPC5L	0.0740447	0.12694	0.297	0.271	1
SNX6	0.0802624	0.10331	0.393	0.369	1
TMEM167A	0.0804062	-0.104798	0.17	0.19	1
SCARF1	0.0823471	0.117285	0.218	0.195	1
MCTP1	0.0872213	0.114972	0.505	0.483	1
KIAA0355	0.0897878	0.116306	0.481	0.452	1
SERTAD1	0.0908957	0.105968	0.341	0.325	1
GALNT15	0.0928748	0.12363	0.11	0.093	1
RSF1	0.0945593	-0.1133	0.333	0.355	1
P4HB	0.0960611	0.101822	0.367	0.342	1
BDP1	0.103456	0.122867	0.316	0.291	1
DPP7	0.108215	0.102412	0.268	0.246	1
NDUFB6	0.114932	0.111958	0.303	0.283	1
TMEM59	0.115074	-0.103011	0.593	0.602	1
BZW1	0.116382	0.105202	0.436	0.413	1
SNRPG	0.117165	0.130412	0.469	0.454	1
CLIP1	0.120498	-0.106749	0.225	0.243	1
BCAP29	0.124829	0.118539	0.376	0.356	1
TCEA1	0.12906	0.1049	0.386	0.361	1
HP1BP3	0.129478	0.119143	0.481	0.469	1
GLTP	0.132642	0.109799	0.152	0.133	1
C11orf96	0.133668	0.199083	0.134	0.117	1
SULF2	0.134794	0.10674	0.383	0.357	1
H6PD	0.13907	0.100395	0.132	0.116	1
ZNF385D	0.140543	-0.105971	0.263	0.279	1
EIF5B	0.144003	0.109425	0.566	0.541	1
MANF	0.150364	0.13457	0.19	0.172	1
AKT3	0.151323	0.105588	0.263	0.246	1
NFIC	0.151673	0.105787	0.43	0.405	1
QKI	0.155271	0.114935	0.442	0.426	1
WASF2	0.160166	0.101477	0.617	0.612	1
PRKCH	0.160219	0.136239	0.267	0.246	1
HES1	0.164228	-0.288968	0.6	0.617	1
LUM	0.180522	0.114178	0.001	0	1
APOD	0.181164	0.189924	0.183	0.168	1
SUPT16H	0.183879	0.101277	0.277	0.258	1
PGF	0.184091	0.178521	0.118	0.104	1
SELENOK	0.188785	0.109399	0.388	0.371	1
LINC-PINT	0.203643	-0.103397	0.14	0.153	1
DDIT4	0.204894	-0.122533	0.249	0.262	1
TRA2B	0.212322	0.104901	0.49	0.475	1
UBALD2	0.219333	0.113757	0.253	0.237	1
PITPNB	0.224599	0.109419	0.273	0.256	1
AURKAIP1	0.228786	0.116273	0.366	0.35	1
VDAC1	0.229794	0.124242	0.359	0.343	1
SRP14	0.244221	-0.163869	0.966	0.973	1
STT3B	0.250487	0.100372	0.142	0.128	1
COL18A1	0.259239	0.172024	0.552	0.551	1
RNF213	0.34259	0.129547	0.328	0.312	1
TUBA1B	0.369771	0.127106	0.74	0.75	1
LARP7	0.387684	0.131385	0.323	0.314	1
EMP1	0.389052	0.152002	0.662	0.67	1
LMAN1	0.402478	0.103272	0.392	0.385	1
LY6E	0.466311	0.101977	0.772	0.78	1
CEP68	0.495555	0.100842	0.3	0.293	1
CCND1	0.497845	0.114774	0.308	0.304	1
IRF1	0.505028	0.153779	0.399	0.396	1
NSUN6	0.530404	-0.10048	0.178	0.184	1
SOD2	0.677857	0.13442	0.396	0.398	1
EIF5	0.685466	0.11242	0.471	0.471	1
AL627171.2	0.771953	0.153365	0.273	0.269	1
FOSB	0.774779	-0.139514	0.474	0.48	1
CYB5D2	0.936003	0.302128	0.132	0.134	1

## Sheet: Capillary-Vein
Symbol	p_val	avg_log2FC	pct.1	pct.2	p_val_adj
RPS18	3.22231e-188	0.503827	1	1	1.1794e-183
RPL10	1.1713e-187	0.489093	0.999	1	4.28707e-183
CLDN5	1.23614e-182	0.562323	0.957	0.825	4.52441e-178
RPS2	8.39396e-178	0.545064	1	0.999	3.07227e-173
RPL12	3.70132e-167	0.521939	1	0.998	1.35472e-162
RPL41	7.09022e-159	0.442201	1	0.999	2.59509e-154
CD74	9.17308e-156	0.602754	0.999	0.988	3.35744e-151
HLA-DRA	1.98577e-155	0.763571	0.954	0.882	7.26813e-151
RPL28	2.35189e-153	0.458524	1	0.997	8.60817e-149
CLU	7.6314e-150	-1.20307	0.984	0.976	2.79317e-145
RPL32	1.239e-143	0.439912	1	0.999	4.53487e-139
RPL11	2.30799e-140	0.408376	0.999	0.999	8.44746e-136
RPS19	2.7167e-140	0.463038	1	0.999	9.94338e-136
RPS8	1.32198e-139	0.429163	0.999	1	4.83858e-135
RPL17	1.79388e-134	0.446819	0.997	0.992	6.56578e-130
RPL26	6.49696e-132	0.417106	1	0.998	2.37795e-127
RPS7	8.79878e-130	0.480522	0.994	0.99	3.22044e-125
RPL34	1.0747e-129	0.384338	1	1	3.93351e-125
RPLP1	8.32589e-129	0.379355	1	1	3.04736e-124
RPL36A	4.93024e-128	0.451302	0.998	0.992	1.80452e-123
HLA-DRB1	3.45065e-126	0.68958	0.963	0.907	1.26297e-121
RPS28	9.12458e-125	0.400833	1	1	3.33969e-120
SULF1	8.60747e-123	-0.767722	0.055	0.272	3.15042e-118
COL15A1	7.52907e-121	0.616579	0.603	0.349	2.75571e-116
GNG11	5.92266e-120	0.464099	0.993	0.977	2.16775e-115
RPL7A	1.80861e-119	0.421253	0.997	0.994	6.61971e-115
HLA-DPA1	2.30123e-119	0.723751	0.84	0.691	8.42272e-115
GSN	4.09195e-117	0.584286	0.951	0.879	1.49769e-112
RPLP0	7.39562e-117	0.490914	0.989	0.973	2.70687e-112
CST3	9.15786e-117	0.504667	0.993	0.982	3.35187e-112
EEF1A1	1.22201e-116	0.340148	1	1	4.47267e-112
RPS9	1.47465e-115	0.437276	0.997	0.993	5.39737e-111
RPL13	3.03388e-114	0.356585	1	1	1.11043e-109
RPL29	5.6163e-114	0.440731	0.998	0.994	2.05562e-109
RPL3	7.31154e-112	0.398361	0.999	0.999	2.6761e-107
RPL30	4.28347e-110	0.366135	1	0.998	1.56779e-105
RPL8	2.4765e-105	0.406752	0.999	0.998	9.06426e-101
RPS13	2.46236e-103	0.380427	0.999	0.994	9.01248e-99
ACKR1	7.87574e-103	0.639045	0.975	0.898	2.8826e-98
RPS12	7.22047e-102	0.353659	1	0.999	2.64276e-97
RPS4X	9.62557e-101	0.397059	0.997	0.995	3.52306e-96
RPS3A	1.27497e-100	0.403373	0.998	0.996	4.66652e-96
RPL18A	1.16773e-99	0.39121	0.998	0.993	4.27401e-95
RPS6	6.9106e-98	0.383398	0.998	0.998	2.52935e-93
RPL10A	8.57513e-98	0.405475	0.992	0.988	3.13858e-93
RPL35A	4.62102e-97	0.356686	0.999	0.997	1.69134e-92
RPS27A	5.13727e-96	0.349022	1	0.998	1.88029e-91
ITM2A	9.12825e-96	0.711028	0.774	0.629	3.34103e-91
HLA-DPB1	1.74283e-95	0.698904	0.74	0.579	6.37893e-91
RPS15A	1.4767e-94	0.349717	0.998	0.998	5.40486e-90
SPARCL1	6.98064e-93	0.402866	1	0.997	2.55498e-88
RPL37	1.48563e-92	0.316571	0.999	0.999	5.43757e-88
TPT1	3.39336e-92	0.311576	1	1	1.242e-87
LY6E	1.20369e-88	0.584481	0.859	0.743	4.40562e-84
RPS15	2.91563e-88	0.341148	0.997	0.997	1.06715e-83
MMRN1	3.54328e-88	-0.821232	0.494	0.655	1.29688e-83
RPS21	5.99875e-87	0.333699	0.999	0.996	2.1956e-82
RPL36	6.05294e-87	0.363922	0.997	0.992	2.21544e-82
RPS3	4.64011e-86	0.373995	0.992	0.992	1.69833e-81
FAU	2.53331e-85	0.348674	0.997	0.994	9.27216e-81
HLA-DQA1	2.26975e-81	0.593876	0.415	0.224	8.3075e-77
RPL18	3.51656e-81	0.347717	0.995	0.994	1.2871e-76
RPL19	1.09397e-80	0.324476	0.999	0.998	4.00402e-76
CTSH	2.54704e-80	0.582859	0.675	0.494	9.32242e-76
A2M	7.70423e-80	0.364202	0.866	0.686	2.81983e-75
CYP1B1	1.25995e-77	-0.865864	0.093	0.265	4.61154e-73
RPS5	2.759e-77	0.409521	0.988	0.977	1.00982e-72
RPS24	1.37086e-76	0.317815	1	0.999	5.0175e-72
NACA	3.81393e-76	0.348152	0.995	0.991	1.39594e-71
RPL39	5.99063e-75	0.32266	0.999	0.997	2.19263e-70
PERP	8.39859e-74	-0.741665	0.348	0.518	3.07397e-69
AKR1C1	1.8425e-73	-0.858657	0.28	0.46	6.74375e-69
RPS23	2.51796e-73	0.294351	0.999	0.999	9.21597e-69
HLA-C	4.84106e-73	0.348328	0.988	0.976	1.77188e-68
IFI27	1.03309e-72	0.355646	0.988	0.972	3.78123e-68
PRMT1	1.54258e-72	0.541096	0.646	0.475	5.64598e-68
ADM5	2.21231e-71	0.551117	0.359	0.19	8.09729e-67
HLA-A	9.08197e-71	0.352795	0.993	0.982	3.32409e-66
RPL5	3.71121e-70	0.350304	0.995	0.99	1.35834e-65
HLA-DMA	6.15648e-69	0.525506	0.607	0.439	2.25333e-64
RPL15	1.97044e-66	0.303158	0.994	0.985	7.212e-62
RPS14	5.00404e-66	0.272063	1	1	1.83153e-61
RPL37A	1.16387e-65	0.278242	0.997	0.998	4.25988e-61
FBLN2	1.93075e-65	-0.564976	0.192	0.369	7.06675e-61
RPS25	2.52087e-65	0.302436	0.998	0.993	9.22664e-61
EEF1B2	7.51595e-64	0.391147	0.951	0.911	2.75091e-59
GAS5	8.35705e-64	0.424346	0.889	0.806	3.05876e-59
ACTG1	1.98616e-63	0.405462	0.982	0.97	7.26954e-59
RPL24	8.67131e-63	0.303054	0.998	0.989	3.17379e-58
CYTL1	1.27071e-61	0.411644	0.335	0.175	4.65092e-57
SNHG29	4.93089e-61	0.423983	0.925	0.878	1.80476e-56
IGFBP7	1.02808e-60	0.377802	0.982	0.967	3.76287e-56
RPL6	2.88655e-60	0.302212	0.995	0.993	1.0565e-55
HLA-B	5.35741e-60	0.31169	0.994	0.992	1.96087e-55
RPL35	2.7089e-59	0.277762	0.997	0.993	9.91485e-55
AKR1C2	4.02671e-59	-0.69286	0.107	0.256	1.47382e-54
BMX	5.73393e-59	-0.46575	0.134	0.295	2.09868e-54
VWF	2.23821e-58	-0.72174	0.828	0.856	8.19208e-54
EFEMP1	7.47089e-56	-0.853686	0.178	0.332	2.73442e-51
FAM13C	9.90959e-56	0.473145	0.45	0.287	3.62701e-51
RPL21	6.49378e-54	0.263394	0.997	0.996	2.37679e-49
RPL9	1.06635e-53	0.266958	0.995	0.992	3.90295e-49
RACK1	5.34563e-53	0.31821	0.979	0.968	1.95655e-48
HLA-DQB1	7.72698e-53	0.558889	0.565	0.415	2.82815e-48
MGLL	7.78293e-53	0.469475	0.662	0.519	2.84863e-48
LGALS3	1.02771e-52	0.364606	0.98	0.96	3.76153e-48
GJA4	4.12509e-52	-0.398428	0.028	0.136	1.50983e-47
ITPR2	1.00705e-51	-0.448298	0.16	0.312	3.68592e-47
KCNN3	1.31955e-51	-0.324384	0.047	0.166	4.82967e-47
RPS10	2.0837e-51	0.324388	0.98	0.963	7.62656e-47
RPL14	2.10865e-51	0.287502	0.991	0.988	7.71787e-47
RPS4Y1	4.59671e-51	0.414469	0.841	0.777	1.68244e-46
RPL22	3.99619e-50	0.275937	0.994	0.99	1.46264e-45
PTGIS	7.78996e-50	-0.32378	0.018	0.114	2.8512e-45
RPS29	7.79569e-50	0.24534	0.999	0.998	2.8533e-45
NME2	6.56167e-49	0.332455	0.955	0.923	2.40164e-44
ST8SIA6	7.47124e-49	-0.326074	0.036	0.141	2.73455e-44
SKIL	1.37176e-47	-0.438893	0.163	0.307	5.02077e-43
FCGRT	1.41493e-47	0.442406	0.718	0.603	5.17878e-43
GAS6	2.38496e-47	-0.448099	0.201	0.351	8.72919e-43
SCARA3	3.58654e-47	-0.349238	0.059	0.175	1.31271e-42
CPE	5.33049e-46	-0.356018	0.011	0.095	1.95101e-41
RPS27	1.27561e-45	0.218589	1	1	4.66886e-41
HSPG2	3.65539e-44	-0.514997	0.607	0.715	1.33791e-39
TESC	4.97154e-44	0.33102	0.283	0.157	1.81963e-39
HLA-DQA2	7.19651e-44	0.358309	0.269	0.149	2.63399e-39
ANGPT2	1.84431e-43	0.371917	0.416	0.271	6.75034e-39
CD34	1.95193e-43	0.310336	0.924	0.85	7.14427e-39
RPL7	3.19788e-43	0.270603	0.987	0.977	1.17046e-38
NDRG4	2.88505e-42	-0.229568	0.022	0.11	1.05596e-37
CCL14	3.12573e-42	0.324845	0.989	0.964	1.14405e-37
PDCD4	2.00127e-41	-0.513607	0.396	0.525	7.32486e-37
SPARC	1.97387e-40	0.247699	0.831	0.735	7.22454e-36
B2M	4.21983e-40	0.176794	1	1	1.5445e-35
LAMB1	2.20264e-39	-0.322989	0.087	0.199	8.06188e-35
NR2F2	3.85522e-39	-0.526819	0.52	0.609	1.41105e-34
IL33	4.35263e-39	0.364226	0.636	0.511	1.59311e-34
TMSB10	9.21796e-39	0.228497	0.999	0.999	3.37387e-34
RPLP2	1.88688e-38	0.21039	0.999	0.996	6.90618e-34
GMFG	5.36107e-38	0.34883	0.482	0.347	1.96221e-33
PLPP1	5.79229e-38	-0.434001	0.139	0.259	2.12004e-33
CFH	1.23132e-37	-0.350806	0.073	0.177	4.50674e-33
RAB13	1.90234e-37	0.336224	0.778	0.683	6.96277e-33
PLCXD3	2.19323e-37	-0.235892	0.009	0.077	8.02743e-33
DKK3	2.84448e-37	-0.359738	0.083	0.19	1.04111e-32
PLXDC2	4.30951e-37	-0.307361	0.095	0.206	1.57732e-32
UTRN	1.0548e-36	-0.43682	0.376	0.507	3.86068e-32
TMOD1	1.42919e-36	-0.266199	0.05	0.144	5.23098e-32
IGFBP2	1.6481e-36	0.382666	0.486	0.354	6.03222e-32
FGF2	5.45686e-36	-0.405583	0.193	0.318	1.99726e-31
RPL31	6.68377e-36	0.270939	0.972	0.949	2.44632e-31
APP	1.61917e-35	-0.370894	0.661	0.745	5.92631e-31
IFITM1	1.72512e-35	0.323561	0.438	0.308	6.3141e-31
ZNF385D	3.53538e-35	0.333203	0.361	0.24	1.29398e-30
SNHG7	7.25518e-35	0.358455	0.861	0.806	2.65547e-30
ARL15	9.89265e-35	-0.357633	0.072	0.168	3.62081e-30
TIMP2	1.14238e-34	-0.3575	0.39	0.526	4.18123e-30
HEY1	1.90684e-34	-0.272725	0.02	0.092	6.97921e-30
RPL23	3.33066e-34	0.282145	0.982	0.972	1.21905e-29
SEMA3G	7.84832e-34	-0.26469	0.015	0.084	2.87256e-29
CCDC3	1.24234e-33	-0.371824	0.301	0.431	4.5471e-29
FBN1	1.36575e-33	-0.276808	0.066	0.16	4.99879e-29
AQP1	1.43472e-33	0.225869	0.969	0.922	5.25121e-29
PFDN5	1.9907e-33	0.271861	0.952	0.925	7.28615e-29
IL3RA	2.77959e-33	0.329901	0.513	0.391	1.01736e-28
NET1	4.43928e-33	-0.386769	0.286	0.415	1.62482e-28
IL6ST	5.4152e-33	-0.4215	0.506	0.613	1.98202e-28
RHOB	6.12455e-33	-0.627111	0.336	0.452	2.24165e-28
VCAN	1.10726e-32	-0.249537	0.021	0.092	4.05269e-28
RPL38	1.17376e-32	0.206287	0.993	0.987	4.29607e-28
VEGFC	1.35007e-32	-0.252228	0.082	0.182	4.94141e-28
IGFBP3	1.67288e-32	-1.41653	0.054	0.139	6.1229e-28
SCARB1	2.40479e-32	0.326136	0.389	0.27	8.80177e-28
NNMT	2.66276e-32	-0.482993	0.218	0.336	9.74597e-28
CALD1	3.95201e-32	-0.414602	0.453	0.564	1.44647e-27
EMILIN2	5.59523e-32	0.229685	0.168	0.083	2.04791e-27
TNFRSF6B	5.69652e-32	0.367816	0.188	0.098	2.08498e-27
CRIP1	5.94641e-32	-0.558014	0.671	0.75	2.17645e-27
UBA52	6.8502e-32	0.23498	0.981	0.966	2.50724e-27
RPSA	8.56797e-32	0.268366	0.96	0.933	3.13596e-27
SELENOW	1.11012e-31	0.297437	0.941	0.915	4.06315e-27
VWA1	1.22583e-31	0.329372	0.45	0.329	4.48665e-27
PTMA	1.82991e-31	0.185651	0.999	0.999	6.69766e-27
RPL27	2.20045e-31	0.236775	0.977	0.964	8.05387e-27
IFITM3	3.07489e-31	0.20599	0.997	0.993	1.12544e-26
PRDX4	3.38179e-31	0.343126	0.483	0.364	1.23777e-26
SOCS3	3.68856e-31	0.531102	0.798	0.737	1.35005e-26
ACKR3	3.78853e-31	-0.250012	0.042	0.122	1.38664e-26
PLVAP	5.32797e-31	0.261219	0.805	0.713	1.95009e-26
CYGB	7.37227e-31	0.2106	0.149	0.071	2.69832e-26
FAM110D	9.14803e-31	0.34283	0.604	0.496	3.34827e-26
HES4	2.11798e-30	-0.260064	0.036	0.112	7.75203e-26
RSPO3	2.20307e-30	-0.217886	0.01	0.069	8.06345e-26
LTBP4	7.55224e-30	-0.34909	0.134	0.239	2.7642e-25
UBC	1.46689e-29	0.290579	0.976	0.97	5.36897e-25
TMOD3	2.26782e-29	-0.331887	0.613	0.704	8.30043e-25
GUCY1A1	3.69072e-29	-0.230028	0.044	0.121	1.35084e-24
LINC01013	3.97322e-29	0.194468	0.147	0.07	1.45424e-24
MIR99AHG	5.50194e-29	-0.207065	0.027	0.095	2.01377e-24
GPM6A	6.68844e-29	-0.191132	0.016	0.076	2.44804e-24
ANXA3	1.14423e-28	-0.197189	0.016	0.077	4.18799e-24
EMP3	1.37825e-28	-0.286691	0.045	0.121	5.04452e-24
H3F3A	1.42893e-28	0.25024	0.964	0.942	5.23004e-24
LYST	1.45261e-28	-0.322084	0.125	0.224	5.31671e-24
RPL23A	2.36314e-28	0.219693	0.983	0.97	8.64933e-24
PTGS2	3.02196e-28	-0.42103	0.031	0.099	1.10607e-23
PTPRB	3.16204e-28	-0.359865	0.444	0.552	1.15734e-23
IFI16	5.71953e-28	0.297452	0.761	0.681	2.0934e-23
TYMP	6.12497e-28	0.298258	0.411	0.298	2.2418e-23
PODXL	7.6165e-28	-0.349519	0.315	0.428	2.78772e-23
BTF3	7.7232e-28	0.264163	0.943	0.906	2.82677e-23
PTPRE	9.31447e-28	-0.297113	0.128	0.227	3.40919e-23
CLEC2B	1.02095e-27	0.317601	0.554	0.452	3.73676e-23
PIM3	1.1088e-27	0.299858	0.703	0.605	4.05831e-23
CCDC85B	1.19455e-27	0.281684	0.824	0.754	4.37216e-23
SLC9A3R2	1.98957e-27	-0.597358	0.547	0.639	7.28202e-23
SPTAN1	4.01608e-27	-0.324949	0.407	0.516	1.46993e-22
CRTAC1	5.34564e-27	-0.237328	0.013	0.069	1.95656e-22
ITSN2	1.15451e-26	-0.238268	0.078	0.163	4.2256e-22
MYL6	1.29329e-26	0.229784	0.958	0.938	4.73357e-22
EEF1G	1.48794e-26	0.219117	0.961	0.935	5.44601e-22
SPHK1	1.57174e-26	0.266061	0.518	0.404	5.75272e-22
ETS2	1.7204e-26	0.327627	0.68	0.595	6.29683e-22
NUDT4	1.80994e-26	-0.254995	0.087	0.174	6.62458e-22
CTSC	2.31904e-26	0.411532	0.55	0.45	8.48792e-22
NOP53	2.45282e-26	0.23802	0.88	0.837	8.97758e-22
FILIP1L	2.66547e-26	-0.341946	0.238	0.346	9.75589e-22
RPL13A	3.59096e-26	0.182806	0.996	0.995	1.31433e-21
MGP	4.14135e-26	-1.28069	0.906	0.913	1.51577e-21
LRIG1	4.40946e-26	-0.242757	0.073	0.156	1.61391e-21
ELN	1.67791e-25	-0.290689	0.123	0.217	6.14133e-21
WWTR1	3.03698e-25	-0.349374	0.428	0.535	1.11157e-20
NFIA	3.28953e-25	-0.349026	0.504	0.601	1.204e-20
ADGRA2	7.53962e-25	-0.27652	0.103	0.191	2.75958e-20
LAMA4	9.57376e-25	-0.274108	0.144	0.24	3.50409e-20
RAB11FIP1	1.7139e-24	-0.228214	0.081	0.162	6.27304e-20
LTBP1	2.52739e-24	-0.218211	0.046	0.114	9.25048e-20
BHLHE41	3.19833e-24	-0.231384	0.049	0.119	1.17062e-19
GJC2	3.28126e-24	-0.212139	0.045	0.113	1.20097e-19
IER2	3.63142e-24	0.301395	0.925	0.902	1.32914e-19
APLNR	4.71631e-24	0.197298	0.251	0.158	1.72622e-19
JUNB	5.55938e-24	0.384133	0.934	0.916	2.03479e-19
GAPDH	6.10133e-24	0.210939	0.985	0.969	2.23315e-19
CCDC80	1.1462e-23	-0.340964	0.106	0.191	4.19519e-19
CAVIN2	1.97369e-23	-0.381488	0.559	0.634	7.22389e-19
BMPR2	2.41738e-23	-0.316172	0.409	0.516	8.84784e-19
VAMP5	5.2378e-23	0.275842	0.73	0.652	1.91709e-18
JAG1	5.82218e-23	-0.380509	0.123	0.208	2.13098e-18
SESN3	6.05128e-23	-0.238452	0.106	0.191	2.21483e-18
SPTBN1	9.22416e-23	-0.295798	0.685	0.756	3.37614e-18
TACC1	9.5425e-23	-0.333214	0.529	0.613	3.49265e-18
RPS16	1.09794e-22	0.169511	0.992	0.989	4.01856e-18
NORAD	1.1359e-22	-0.297847	0.42	0.518	4.15751e-18
KCTD12	3.03124e-22	-0.328881	0.711	0.771	1.10947e-17
PCSK5	3.63593e-22	-0.148177	0.007	0.049	1.33079e-17
ID2	3.89809e-22	-0.327562	0.285	0.391	1.42674e-17
SNAI1	4.20882e-22	0.212615	0.159	0.089	1.54047e-17
HSD17B12	4.26197e-22	-0.289503	0.277	0.381	1.55992e-17
BMP4	4.3307e-22	-0.230738	0.068	0.141	1.58508e-17
DAAM1	4.87094e-22	-0.406324	0.527	0.604	1.78281e-17
DUSP23	6.99304e-22	0.278904	0.598	0.496	2.55952e-17
S100A13	9.16904e-22	0.270942	0.828	0.78	3.35596e-17
CRIM1	1.25765e-21	-0.343692	0.477	0.568	4.60313e-17
EGFL7	1.34952e-21	0.266428	0.907	0.882	4.93938e-17
EDNRB	1.79181e-21	-0.286718	0.084	0.16	6.55819e-17
FBLN5	1.97206e-21	-0.150131	0.006	0.046	7.21793e-17
TXNIP	2.26233e-21	-0.233639	0.972	0.983	8.28036e-17
MMP2	2.28239e-21	-0.139134	0.017	0.066	8.35378e-17
BMP6	2.79915e-21	-0.248838	0.113	0.194	1.02452e-16
PDLIM1	5.08584e-21	0.256946	0.785	0.731	1.86147e-16
HLA-DRB5	5.40732e-21	0.406076	0.622	0.556	1.97913e-16
EMCN	6.9163e-21	0.281335	0.681	0.602	2.53144e-16
ITGB4	7.20039e-21	-0.332025	0.571	0.646	2.63541e-16
NEURL1B	8.19632e-21	0.182845	0.163	0.094	2.99993e-16
ZFHX3	9.90261e-21	-0.171496	0.041	0.101	3.62445e-16
ENTPD1	1.21644e-20	-0.290832	0.269	0.365	4.45229e-16
TSPAN7	1.5586e-20	0.265394	0.706	0.635	5.70462e-16
TMEM178A	1.76206e-20	-0.123181	0.003	0.038	6.44933e-16
MEOX1	1.91428e-20	0.244958	0.426	0.328	7.00646e-16
RASSF9	1.98631e-20	-0.237582	0.129	0.211	7.27009e-16
FAM241A	2.43133e-20	0.227244	0.386	0.293	8.8989e-16
PLPP3	2.44034e-20	-0.220357	0.07	0.139	8.93188e-16
SELE	2.68495e-20	0.47617	0.322	0.232	9.8272e-16
FOXP1	2.8093e-20	-0.291214	0.597	0.672	1.02823e-15
CCN2	3.01565e-20	0.276412	0.844	0.778	1.10376e-15
MAP1LC3B	3.09371e-20	0.263601	0.615	0.532	1.13233e-15
AL583785.1	4.29912e-20	0.179862	0.127	0.067	1.57352e-15
CPVL	4.85592e-20	0.267033	0.366	0.273	1.77732e-15
BPTF	5.80338e-20	-0.286003	0.337	0.434	2.1241e-15
NOSTRIN	6.42892e-20	0.259293	0.555	0.462	2.35305e-15
BACE2	7.80323e-20	0.261773	0.515	0.426	2.85606e-15
NRN1	9.54331e-20	0.299683	0.61	0.531	3.49295e-15
SPATA13	1.07433e-19	-0.169575	0.047	0.107	3.93214e-15
BCAM	1.11743e-19	0.227559	0.759	0.699	4.08991e-15
GLUL	1.27039e-19	-0.338638	0.489	0.569	4.64977e-15
COTL1	1.31372e-19	0.234967	0.321	0.232	4.80835e-15
EFNB2	1.31899e-19	-0.367475	0.187	0.272	4.82762e-15
FLNA	1.47085e-19	-0.334205	0.391	0.484	5.38347e-15
CAMK2N1	1.50027e-19	0.110198	0.067	0.026	5.49114e-15
SEC14L1	1.72922e-19	0.273272	0.489	0.394	6.32913e-15
MMP28	2.54065e-19	-0.292374	0.314	0.405	9.29903e-15
STOM	3.17552e-19	-0.275531	0.53	0.613	1.16227e-14
PXDN	3.36196e-19	0.165762	0.213	0.137	1.23051e-14
SLPI	3.39773e-19	-0.168575	0.037	0.093	1.2436e-14
EEF1D	3.87657e-19	0.234498	0.923	0.897	1.41886e-14
PSMB8	4.88404e-19	0.227192	0.598	0.518	1.78761e-14
NPC2	8.45232e-19	0.202696	0.742	0.672	3.09363e-14
ADGRL4	9.55656e-19	0.240269	0.744	0.67	3.4978e-14
PALLD	9.84013e-19	-0.23025	0.108	0.181	3.60159e-14
NEBL	1.25439e-18	-0.168885	0.024	0.072	4.59118e-14
UQCRH	1.58597e-18	0.241069	0.704	0.639	5.8048e-14
SERPING1	2.05191e-18	0.251365	0.526	0.432	7.51021e-14
COX4I1	2.60274e-18	0.214586	0.882	0.85	9.52629e-14
CTHRC1	2.76146e-18	0.233893	0.371	0.28	1.01072e-13
ACE	2.77621e-18	-0.27421	0.207	0.292	1.01612e-13
STC1	2.86265e-18	-0.243421	0.073	0.138	1.04776e-13
SYNPO	3.11213e-18	-0.207395	0.132	0.211	1.13907e-13
RBMS3	5.76458e-18	-0.207182	0.089	0.157	2.10989e-13
ATP2A3	5.84812e-18	-0.153383	0.031	0.081	2.14047e-13
CALCRL	6.54957e-18	-0.306872	0.344	0.435	2.39721e-13
PROX1	7.00335e-18	-0.234446	0.101	0.172	2.5633e-13
TSPAN2	8.22589e-18	-0.226457	0.193	0.279	3.01076e-13
CTNNB1	8.4512e-18	-0.230698	0.242	0.333	3.09322e-13
SH3BP5	9.04038e-18	0.261271	0.64	0.566	3.30887e-13
SERPINE1	1.18137e-17	-0.309367	0.087	0.153	4.32394e-13
DST	1.24857e-17	-0.250296	0.111	0.183	4.56988e-13
RASSF8	1.61059e-17	-0.167455	0.08	0.145	5.8949e-13
CLIC1	1.9008e-17	0.209823	0.807	0.748	6.95713e-13
SERTAD1	2.5351e-17	0.322012	0.384	0.301	9.27871e-13
FOXC1	2.71416e-17	-0.22045	0.255	0.342	9.93409e-13
POLR2L	4.21936e-17	0.216305	0.848	0.81	1.54433e-12
AHNAK2	4.44754e-17	-0.224235	0.163	0.241	1.62784e-12
TGM2	5.18606e-17	-0.15205	0.031	0.078	1.89815e-12
NRP1	7.49595e-17	0.222616	0.541	0.452	2.74359e-12
EDN1	8.51427e-17	-0.50106	0.51	0.582	3.11631e-12
DDIT4	9.76765e-17	-0.230428	0.203	0.287	3.57506e-12
LINC01197	1.00133e-16	-0.145019	0.039	0.09	3.66497e-12
HDGFL3	1.03489e-16	-0.250122	0.326	0.413	3.7878e-12
LINC02185	1.21921e-16	0.224219	0.265	0.189	4.46243e-12
MYLK	1.22844e-16	0.221283	0.402	0.317	4.49623e-12
NQO1	1.7486e-16	0.174355	0.173	0.11	6.40004e-12
JAM2	1.78278e-16	0.228194	0.658	0.592	6.52517e-12
MSRB3	2.07635e-16	-0.242815	0.307	0.394	7.59963e-12
LAPTM5	2.38264e-16	-0.161904	0.076	0.138	8.72069e-12
CCND1	2.44022e-16	-0.284766	0.247	0.331	8.93147e-12
RPS20	2.53396e-16	0.162323	0.987	0.979	9.27454e-12
MEF2A	2.58556e-16	-0.255689	0.338	0.426	9.46339e-12
INSR	3.25332e-16	-0.235994	0.1	0.166	1.19075e-11
EBPL	3.37727e-16	0.21857	0.375	0.29	1.23611e-11
IGKC	3.51261e-16	0.252913	0.084	0.041	1.28565e-11
RPS17	3.69335e-16	0.182265	0.981	0.968	1.3518e-11
RPS26	4.41159e-16	0.29399	0.977	0.971	1.61469e-11
EIF4A1	6.66262e-16	0.202517	0.801	0.757	2.43859e-11
PRCP	8.62412e-16	0.226782	0.625	0.545	3.15651e-11
HLA-DMB	1.00473e-15	0.20289	0.246	0.175	3.67742e-11
CXCL12	1.14815e-15	-0.678506	0.092	0.151	4.20236e-11
RPL27A	1.68043e-15	0.140167	0.989	0.989	6.15053e-11
CDH13	1.88672e-15	-0.238333	0.383	0.47	6.90559e-11
HMCN1	1.90237e-15	-0.139254	0.032	0.077	6.96287e-11
OTULINL	2.00221e-15	0.171808	0.139	0.084	7.3283e-11
MARCKS	2.24096e-15	-0.316279	0.363	0.44	8.20215e-11
TSC22D3	2.35339e-15	-0.287518	0.549	0.613	8.61365e-11
GPR146	2.47948e-15	0.206818	0.267	0.195	9.07516e-11
ADD1	2.57804e-15	-0.240727	0.258	0.339	9.43588e-11
BST2	2.63086e-15	0.107158	0.481	0.383	9.62922e-11
EIF3E	2.86502e-15	0.215857	0.735	0.677	1.04863e-10
KRT19	2.95894e-15	-0.112008	0.005	0.034	1.083e-10
CD9	3.71306e-15	-0.270791	0.813	0.841	1.35902e-10
CHCHD2	4.10405e-15	0.195688	0.791	0.742	1.50212e-10
CPXM2	4.22171e-15	-0.178674	0.124	0.193	1.54519e-10
FOS	4.63333e-15	0.356855	0.948	0.927	1.69585e-10
EIF3K	4.65364e-15	0.207513	0.766	0.728	1.70328e-10
PLCB4	5.77157e-15	-0.177996	0.135	0.207	2.11245e-10
S100A10	6.70197e-15	0.163861	0.993	0.988	2.45299e-10
FBXO31	6.77962e-15	0.17605	0.177	0.117	2.48141e-10
SERINC1	8.09119e-15	-0.237012	0.446	0.53	2.96146e-10
CLDN11	8.22816e-15	-0.201873	0.13	0.198	3.01159e-10
SNHG8	9.02611e-15	0.23534	0.741	0.685	3.30365e-10
PHLDA1	1.00477e-14	0.202235	0.168	0.109	3.67754e-10
LMCD1	1.04582e-14	0.235884	0.685	0.627	3.8278e-10
FXYD5	1.37836e-14	0.214382	0.814	0.773	5.04493e-10
WSB1	1.50364e-14	-0.263442	0.34	0.418	5.50348e-10
STXBP6	2.12242e-14	-0.110521	0.024	0.064	7.76827e-10
WWP1	2.12984e-14	-0.254834	0.323	0.403	7.79543e-10
FABP5	3.14788e-14	0.34749	0.564	0.491	1.15215e-09
TMEM173	3.43849e-14	0.231305	0.513	0.442	1.25852e-09
CXCL2	3.4514e-14	-0.390977	0.057	0.107	1.26325e-09
ATP5MC2	3.5964e-14	0.20114	0.794	0.75	1.31632e-09
FN1	3.79642e-14	-0.522783	0.082	0.138	1.38953e-09
EIF3D	3.85806e-14	0.190406	0.502	0.43	1.41209e-09
RFLNB	3.95143e-14	0.115934	0.128	0.076	1.44626e-09
S100A16	4.01349e-14	0.200218	0.629	0.563	1.46898e-09
CFL1	6.2478e-14	0.176592	0.883	0.855	2.28676e-09
HINT1	6.42236e-14	0.216997	0.829	0.781	2.35065e-09
EHD4	6.59887e-14	0.180183	0.395	0.318	2.41525e-09
MATN2	7.16558e-14	0.133306	0.177	0.118	2.62267e-09
CEP85L	7.44505e-14	-0.178113	0.106	0.169	2.72496e-09
HSD17B11	7.52315e-14	0.245592	0.475	0.407	2.75355e-09
GNAS	7.66766e-14	-0.204359	0.853	0.879	2.80644e-09
MEF2C	9.48068e-14	0.190307	0.625	0.556	3.47002e-09
FAM107B	9.9444e-14	-0.165821	0.121	0.186	3.63975e-09
GCNT1	1.04132e-13	-0.113272	0.033	0.074	3.81135e-09
HEG1	1.13116e-13	-0.240566	0.409	0.489	4.14016e-09
PRSS23	1.27851e-13	-0.381454	0.366	0.426	4.67948e-09
ZFP36	1.28201e-13	0.34214	0.754	0.716	4.69228e-09
LTBP2	1.29386e-13	-0.107328	0.005	0.031	4.73566e-09
NUCKS1	1.39117e-13	-0.191271	0.76	0.798	5.09184e-09
SMAD1	1.42916e-13	0.243853	0.516	0.452	5.23088e-09
HIF3A	1.46343e-13	-0.15462	0.09	0.148	5.35629e-09
SERF2	1.90773e-13	0.191355	0.943	0.921	6.9825e-09
CHD3	1.90943e-13	-0.111682	0.045	0.09	6.98872e-09
APOD	2.31196e-13	0.185371	0.213	0.15	8.46202e-09
FRMD4B	2.48579e-13	-0.219845	0.248	0.322	9.09823e-09
COLEC12	2.55079e-13	-0.106941	0.039	0.083	9.33614e-09
MACF1	2.64001e-13	-0.209471	0.464	0.536	9.66269e-09
PLEC	3.22424e-13	-0.228297	0.41	0.49	1.18011e-08
HLA-E	3.29732e-13	0.132946	0.995	0.989	1.20685e-08
GLS	3.55871e-13	-0.204114	0.247	0.32	1.30252e-08
LTC4S	3.80463e-13	-0.21476	0.151	0.215	1.39253e-08
CLDN15	4.17375e-13	0.1579	0.164	0.109	1.52763e-08
KAT6B	5.23311e-13	-0.159892	0.102	0.162	1.91537e-08
CD79B	5.74876e-13	0.158305	0.24	0.175	2.1041e-08
SERPINE2	6.24136e-13	-0.125181	0.006	0.032	2.2844e-08
HLA-F	6.27853e-13	0.194442	0.52	0.441	2.29801e-08
TM4SF18	6.32939e-13	0.177594	0.371	0.298	2.31662e-08
SYT1	6.96328e-13	-0.141138	0.019	0.052	2.54863e-08
ZFAS1	6.99448e-13	0.175237	0.788	0.731	2.56005e-08
TMSB4X	7.02443e-13	0.125011	1	1	2.57101e-08
AOC3	7.04582e-13	0.117802	0.08	0.042	2.57884e-08
DLL1	7.10097e-13	-0.159899	0.078	0.131	2.59903e-08
SNHG5	7.15127e-13	0.161555	0.831	0.784	2.61743e-08
IFITM2	8.37321e-13	0.17339	0.947	0.928	3.06468e-08
ACTB	8.66562e-13	0.159493	0.962	0.953	3.1717e-08
LAP3	8.82639e-13	0.16088	0.441	0.363	3.23055e-08
TSPAN13	9.638e-13	0.149182	0.193	0.134	3.5276e-08
CASC4	9.68576e-13	-0.150141	0.13	0.194	3.54508e-08
ECE1	1.00689e-12	-0.19583	0.531	0.603	3.68533e-08
CDON	1.01974e-12	-0.104135	0.029	0.067	3.73236e-08
MBNL1	1.05805e-12	-0.171865	0.666	0.721	3.87256e-08
DSTN	1.0948e-12	-0.200865	0.942	0.947	4.00706e-08
PMEPA1	1.11075e-12	-0.12022	0.057	0.105	4.06545e-08
PPIA	1.2603e-12	0.154409	0.931	0.906	4.61282e-08
ATF4	1.26598e-12	0.192202	0.568	0.5	4.63362e-08
MTURN	1.3504e-12	-0.15064	0.14	0.206	4.9426e-08
JCAD	1.44582e-12	-0.178349	0.198	0.27	5.29184e-08
FLNB	1.63254e-12	-0.232219	0.321	0.393	5.97527e-08
JAM3	1.67026e-12	0.135275	0.154	0.102	6.11333e-08
TAGLN2	1.69111e-12	0.191744	0.916	0.886	6.18963e-08
MRTFB	1.8453e-12	0.174089	0.538	0.457	6.75398e-08
ESAM	1.93774e-12	0.19684	0.607	0.543	7.09233e-08
SLCO2B1	2.47704e-12	0.121526	0.099	0.057	9.06622e-08
SKI	2.55318e-12	-0.149862	0.137	0.201	9.34489e-08
EBF3	2.6946e-12	-0.206535	0.205	0.275	9.86249e-08
IL13RA1	2.70552e-12	-0.191505	0.159	0.223	9.90249e-08
AHNAK	3.03467e-12	-0.205081	0.826	0.853	1.11072e-07
TNFSF10	3.16205e-12	0.250711	0.813	0.775	1.15734e-07
ID1	3.48349e-12	-0.203075	0.834	0.866	1.27499e-07
ARL4A	3.53869e-12	-0.24382	0.579	0.635	1.29519e-07
SLC40A1	3.58834e-12	-0.172483	0.114	0.171	1.31337e-07
CSRP2	3.80307e-12	0.1787	0.267	0.203	1.39196e-07
SYNE1	4.88438e-12	-0.184482	0.223	0.294	1.78773e-07
SPRY1	5.08406e-12	0.248136	0.403	0.335	1.86082e-07
CTNNAL1	5.1696e-12	0.177141	0.345	0.275	1.89212e-07
NPDC1	5.50757e-12	0.229613	0.831	0.804	2.01583e-07
DIXDC1	5.8144e-12	-0.235493	0.237	0.301	2.12813e-07
POLE4	6.52879e-12	0.20272	0.487	0.421	2.3896e-07
CYSLTR1	6.74835e-12	0.100126	0.093	0.053	2.46997e-07
FNBP1	7.17459e-12	-0.135639	0.12	0.179	2.62597e-07
HMGB1	8.69874e-12	0.139128	0.975	0.963	3.18383e-07
FCHSD2	9.00961e-12	-0.10422	0.051	0.095	3.29761e-07
LCN6	9.6971e-12	0.117503	0.133	0.086	3.54924e-07
PFN1	1.06752e-11	0.157631	0.766	0.723	3.90722e-07
ALKBH7	1.07605e-11	0.188174	0.446	0.382	3.93846e-07
KLF2	1.15346e-11	0.226417	0.933	0.92	4.2218e-07
ADGRG6	1.22916e-11	-0.103607	0.025	0.058	4.49884e-07
OST4	1.23014e-11	0.157867	0.692	0.634	4.50243e-07
RHOU	1.28786e-11	0.191074	0.195	0.141	4.71368e-07
PDE4D	1.42765e-11	-0.116389	0.055	0.099	5.22535e-07
ARL6IP1	1.46487e-11	-0.211838	0.499	0.568	5.36156e-07
RYR3	1.60298e-11	-0.124376	0.04	0.079	5.86705e-07
PXDC1	1.7895e-11	-0.134618	0.127	0.186	6.54974e-07
NID1	2.01515e-11	-0.100084	0.037	0.076	7.37565e-07
EPB41L3	2.02478e-11	-0.190195	0.156	0.216	7.41089e-07
C1orf115	2.35382e-11	0.169264	0.435	0.371	8.61523e-07
PITPNC1	2.36085e-11	0.149566	0.178	0.125	8.64094e-07
ARPC3	2.74018e-11	0.194498	0.627	0.566	1.00293e-06
METRNL	2.87298e-11	-0.222016	0.282	0.352	1.05154e-06
TRIM56	3.16593e-11	-0.162473	0.234	0.304	1.15876e-06
PREX2	3.28063e-11	-0.194173	0.292	0.363	1.20074e-06
OLFM1	3.38371e-11	0.195943	0.384	0.317	1.23847e-06
GOLGA4	3.45684e-11	-0.187048	0.306	0.379	1.26524e-06
CCDC88A	4.92103e-11	-0.154794	0.133	0.191	1.80115e-06
EVA1C	5.05152e-11	0.144797	0.295	0.231	1.84891e-06
SLC41A3	5.6337e-11	-0.144873	0.138	0.196	2.06199e-06
EIF1	7.16848e-11	0.170465	0.979	0.977	2.62374e-06
CORO2A	7.80037e-11	0.107456	0.101	0.062	2.85501e-06
PPP1CB	8.03241e-11	-0.11442	0.197	0.265	2.93994e-06
MAFB	8.57424e-11	-0.114566	0.019	0.049	3.13826e-06
ITGB1	8.81223e-11	-0.166689	0.768	0.799	3.22536e-06
LEPR	8.8852e-11	-0.172467	0.165	0.227	3.25207e-06
UPP1	9.48656e-11	0.212552	0.335	0.272	3.47218e-06
FBXO34	1.04196e-10	-0.128747	0.1	0.153	3.81369e-06
TLE5	1.13819e-10	-0.209747	0.34	0.409	4.16589e-06
CSTB	1.15611e-10	0.163052	0.518	0.452	4.23147e-06
MT-ND5	1.16354e-10	-0.184308	0.961	0.966	4.25865e-06
SPEN	1.18374e-10	-0.164986	0.178	0.241	4.3326e-06
RABAC1	1.23797e-10	0.187275	0.718	0.672	4.53111e-06
MTUS1	1.31816e-10	-0.22636	0.542	0.599	4.82459e-06
SLC2A3	1.31826e-10	0.213117	0.525	0.464	4.82497e-06
RPS6KA5	1.52039e-10	-0.119027	0.079	0.127	5.56479e-06
AVPR2	1.56433e-10	0.165344	0.298	0.237	5.72559e-06
AC004540.2	1.56701e-10	-0.140373	0.091	0.14	5.7354e-06
FGD5	1.57891e-10	-0.185085	0.268	0.336	5.77897e-06
RPL4	1.57933e-10	0.144903	0.899	0.873	5.78052e-06
ZBTB38	1.77947e-10	-0.193267	0.335	0.404	6.51304e-06
ORAI1	1.78019e-10	0.167625	0.315	0.254	6.51567e-06
CARD19	1.87954e-10	0.14718	0.33	0.267	6.8793e-06
HRCT1	2.08077e-10	-0.180836	0.159	0.216	7.61584e-06
SPNS2	2.12607e-10	0.180856	0.333	0.268	7.78164e-06
MBNL2	2.21978e-10	-0.169451	0.257	0.325	8.12461e-06
DOCK9	2.30033e-10	-0.172216	0.266	0.336	8.41945e-06
LDLR	2.7755e-10	0.149119	0.15	0.104	1.01586e-05
LNX1	2.81046e-10	0.132248	0.147	0.101	1.02866e-05
EDF1	2.90089e-10	0.168712	0.789	0.744	1.06175e-05
BGN	3.0404e-10	-0.117588	0.013	0.039	1.11282e-05
FOXO1	3.14955e-10	-0.186619	0.214	0.276	1.15277e-05
SNU13	3.15408e-10	0.175718	0.588	0.53	1.15443e-05
SLC3A2	3.16769e-10	0.190306	0.523	0.466	1.15941e-05
LMO2	3.23485e-10	-0.206213	0.644	0.69	1.18399e-05
C21orf91	3.27361e-10	0.149388	0.171	0.121	1.19817e-05
CLEC3B	3.29099e-10	-0.163619	0.278	0.347	1.20454e-05
SOD2	3.40629e-10	0.246929	0.438	0.38	1.24673e-05
ANXA11	3.55437e-10	0.181273	0.452	0.393	1.30094e-05
CD63	3.65794e-10	0.133678	0.941	0.927	1.33884e-05
PLXNA2	3.75563e-10	-0.12935	0.102	0.153	1.3746e-05
YAP1	4.30274e-10	-0.115186	0.084	0.131	1.57484e-05
BSG	4.3636e-10	0.181823	0.572	0.518	1.59712e-05
PSME1	4.6492e-10	0.184463	0.749	0.708	1.70166e-05
NPM1	4.71052e-10	0.157303	0.828	0.798	1.7241e-05
PLXND1	4.80038e-10	-0.212316	0.371	0.44	1.75699e-05
CHST7	4.99158e-10	0.123469	0.127	0.084	1.82697e-05
PCMTD1	5.20503e-10	-0.177065	0.319	0.385	1.90509e-05
PPL	6.9886e-10	-0.181593	0.161	0.217	2.5579e-05
NDRG1	9.20122e-10	-0.198663	0.433	0.498	3.36774e-05
SNHG6	9.39056e-10	0.146379	0.79	0.752	3.43704e-05
SMAD7	9.48677e-10	-0.117648	0.082	0.127	3.47225e-05
LRG1	1.05225e-09	0.170909	0.079	0.046	3.85133e-05
F2R	1.14528e-09	-0.138357	0.16	0.216	4.19183e-05
TXN	1.14648e-09	0.181165	0.725	0.68	4.19622e-05
HERC1	1.24542e-09	-0.150716	0.117	0.167	4.55838e-05
SLC44A1	1.43337e-09	-0.144729	0.121	0.173	5.24626e-05
TIE1	1.47513e-09	-0.188551	0.286	0.351	5.39914e-05
MYC	1.50895e-09	0.139793	0.219	0.166	5.5229e-05
S1PR1	1.52373e-09	-0.156181	0.304	0.371	5.57699e-05
CDC42EP4	1.62335e-09	0.14081	0.196	0.147	5.94163e-05
PDE4B	1.67493e-09	-0.126485	0.085	0.13	6.13042e-05
STX7	1.68588e-09	-0.156192	0.134	0.187	6.1705e-05
C1orf54	1.6973e-09	0.102669	0.09	0.055	6.21231e-05
ANXA4	1.69857e-09	-0.148057	0.219	0.28	6.21692e-05
SLC38A2	1.81351e-09	-0.179436	0.367	0.428	6.63762e-05
TEK	1.85509e-09	-0.129157	0.15	0.205	6.7898e-05
CAMSAP2	2.09754e-09	-0.159546	0.157	0.21	7.67721e-05
RGS16	2.2211e-09	0.392373	0.326	0.269	8.12946e-05
ATP2B1	2.30512e-09	-0.175555	0.305	0.369	8.43697e-05
SUN2	2.33068e-09	-0.141589	0.239	0.301	8.53052e-05
RPL22L1	2.39187e-09	0.130481	0.323	0.263	8.75447e-05
HIGD2A	2.46577e-09	0.169028	0.375	0.32	9.02497e-05
ELK4	2.50023e-09	-0.119431	0.193	0.253	9.1511e-05
SERBP1	2.54544e-09	0.144611	0.813	0.779	9.31656e-05
PHPT1	2.71517e-09	0.190979	0.382	0.33	9.9378e-05
NPTN	2.72906e-09	-0.120567	0.076	0.119	9.98862e-05
EPB41L2	3.12755e-09	-0.128522	0.096	0.142	0.000114472
NUAK1	3.22752e-09	-0.197619	0.391	0.455	0.000118131
EPAS1	3.23271e-09	-0.188926	0.61	0.654	0.00011832
PLLP	3.26617e-09	-0.105201	0.057	0.094	0.000119545
SULF2	3.35327e-09	-0.202723	0.314	0.38	0.000122733
SNRPF	3.38215e-09	0.180957	0.544	0.491	0.00012379
GATA2	3.46279e-09	-0.174376	0.228	0.286	0.000126742
CD99	3.54922e-09	0.13851	0.896	0.876	0.000129905
ALDH1A2	3.57058e-09	-0.117488	0.055	0.092	0.000130687
PABPC1	3.69368e-09	0.179575	0.794	0.771	0.000135192
CCN1	3.88527e-09	-0.4196	0.258	0.31	0.000142205
GOLGB1	4.11075e-09	-0.16981	0.35	0.414	0.000150458
EIF3F	4.39663e-09	0.164381	0.597	0.55	0.000160921
MAOA	4.42654e-09	-0.104907	0.111	0.16	0.000162016
NSA2	5.38801e-09	0.178224	0.65	0.593	0.000197207
PDLIM2	5.52265e-09	0.139339	0.183	0.137	0.000202134
ADAMTS6	5.65022e-09	-0.115869	0.052	0.088	0.000206804
EPHX1	5.9894e-09	0.164684	0.266	0.215	0.000219218
MDFIC	6.51359e-09	-0.147068	0.171	0.226	0.000238404
MIF	6.54019e-09	0.154271	0.856	0.832	0.000239378
SRSF5	6.59544e-09	0.146726	0.739	0.698	0.0002414
NOP10	6.6088e-09	0.166626	0.522	0.468	0.000241889
PSMB9	6.87825e-09	0.178862	0.537	0.484	0.000251751
UBXN1	7.53088e-09	0.148625	0.624	0.568	0.000275638
C19orf53	7.60091e-09	0.155241	0.562	0.508	0.000278201
TACR1	8.13042e-09	0.142708	0.252	0.199	0.000297581
NAA38	8.14308e-09	0.15408	0.588	0.531	0.000298045
ACACB	8.53482e-09	-0.116954	0.106	0.153	0.000312383
SH3BGRL2	9.48417e-09	-0.169689	0.201	0.255	0.00034713
MECOM	9.75759e-09	-0.199116	0.406	0.464	0.000357138
DPYSL3	1.11699e-08	-0.179212	0.209	0.264	0.000408831
PLIN2	1.17173e-08	0.122786	0.207	0.159	0.000428866
YBX1	1.19452e-08	0.12779	0.928	0.912	0.000437207
SOCS2	1.20317e-08	0.172985	0.217	0.168	0.000440371
ATOH8	1.21177e-08	0.111638	0.13	0.09	0.000443521
IMP3	1.21818e-08	0.162696	0.412	0.356	0.000445867
PTPN14	1.23035e-08	-0.108982	0.125	0.173	0.00045032
SELENOH	1.27879e-08	0.154299	0.529	0.478	0.000468051
CDK19	1.31732e-08	-0.107114	0.048	0.081	0.000482154
ATOX1	1.51018e-08	0.197432	0.526	0.475	0.000552741
G0S2	1.6132e-08	0.44458	0.035	0.016	0.000590446
RBM3	1.63029e-08	0.135772	0.804	0.771	0.000596703
PGM5	1.68094e-08	-0.163757	0.165	0.217	0.000615239
ABHD2	1.73993e-08	-0.119698	0.085	0.127	0.000636833
ZBTB20	1.75012e-08	-0.186088	0.406	0.466	0.000640563
SLC25A25	1.84614e-08	0.154471	0.165	0.122	0.000675704
PSMA2	1.89501e-08	0.173569	0.463	0.407	0.000693592
MRPS24	1.94839e-08	0.14883	0.387	0.333	0.000713129
MET	1.97339e-08	-0.147163	0.129	0.176	0.00072228
CCNG2	2.04765e-08	0.106632	0.193	0.146	0.000749462
C19orf33	2.06126e-08	-0.250843	0.136	0.182	0.000754443
SLC25A6	2.06883e-08	0.17916	0.737	0.703	0.000757212
LSM2	2.14289e-08	0.155701	0.423	0.371	0.000784321
SNCA	2.43145e-08	-0.12889	0.146	0.197	0.000889933
PLSCR1	2.4872e-08	0.179679	0.491	0.437	0.000910342
CDKN1A	2.61724e-08	0.35171	0.36	0.311	0.000957935
COX7A2	2.65215e-08	0.134347	0.688	0.642	0.000970713
SOS1	2.82854e-08	-0.11732	0.101	0.145	0.00103527
ODF3B	2.83857e-08	0.15844	0.234	0.186	0.00103895
CLEC14A	2.95626e-08	-0.192633	0.804	0.828	0.00108202
PPIB	3.02204e-08	0.154929	0.672	0.621	0.0011061
SEPTIN2	3.08256e-08	-0.182604	0.422	0.481	0.00112825
TUBA1B	3.08977e-08	0.137021	0.778	0.735	0.00113089
CD320	3.23128e-08	0.153928	0.51	0.459	0.00118268
ARL6IP5	3.31667e-08	-0.179593	0.45	0.505	0.00121394
RNASEK	3.36535e-08	0.128487	0.769	0.738	0.00123175
TBX1	3.3767e-08	-0.184389	0.306	0.365	0.0012359
ATP5PO	3.48362e-08	0.14264	0.514	0.464	0.00127504
TXNDC5	3.95357e-08	-0.116695	0.159	0.211	0.00144705
APRT	4.11894e-08	0.179908	0.496	0.447	0.00150757
VSIR	4.21326e-08	0.149934	0.306	0.254	0.0015421
NUDT3	4.43647e-08	-0.105601	0.117	0.163	0.00162379
PSME2	4.88436e-08	0.199795	0.481	0.433	0.00178773
ATP5MG	4.91924e-08	0.140689	0.687	0.651	0.00180049
TSPAN4	4.933e-08	0.132628	0.623	0.566	0.00180553
HYAL2	5.02792e-08	-0.215367	0.564	0.611	0.00184027
FSTL1	5.17274e-08	-0.147973	0.279	0.336	0.00189328
IER3	5.229e-08	-0.38831	0.693	0.727	0.00191387
KRT7	5.24009e-08	-0.122135	0.054	0.087	0.00191792
ERP29	5.40098e-08	0.138891	0.561	0.509	0.00197681
NCKAP1	5.44117e-08	-0.1475	0.246	0.302	0.00199152
TGOLN2	5.60383e-08	-0.158792	0.329	0.39	0.00205106
FAM171A1	6.09018e-08	-0.116736	0.096	0.138	0.00222907
DYNLRB1	6.29355e-08	0.165297	0.621	0.589	0.0023035
NKTR	6.79961e-08	-0.188011	0.379	0.435	0.00248873
MYL12A	7.69027e-08	0.13141	0.906	0.887	0.00281472
CTSZ	8.05138e-08	-0.169774	0.44	0.496	0.00294689
CA5B	9.17728e-08	-0.102094	0.101	0.143	0.00335898
CCL23	9.19479e-08	0.187984	0.283	0.229	0.00336539
ABCD4	9.54797e-08	0.13395	0.217	0.171	0.00349465
ATRX	1.117e-07	-0.171345	0.507	0.558	0.00408835
VEZF1	1.13339e-07	-0.13875	0.198	0.25	0.00414832
CD93	1.14606e-07	0.141344	0.535	0.483	0.00419471
AP2S1	1.18177e-07	0.131675	0.364	0.314	0.00432539
THBS1	1.18187e-07	-0.128879	0.05	0.082	0.00432574
CDC42EP3	1.34601e-07	0.152349	0.454	0.406	0.00492653
PCGF5	1.34821e-07	-0.118901	0.105	0.146	0.00493458
COMMD6	1.60719e-07	0.149086	0.768	0.728	0.00588247
MAP2K2	1.60959e-07	0.118153	0.33	0.281	0.00589125
SRSF3	1.70678e-07	0.136691	0.66	0.62	0.00624697
EIF2S2	1.74662e-07	0.146809	0.61	0.568	0.0063928
HNRNPA1	1.7558e-07	0.137047	0.861	0.841	0.0064264
ZC3H13	1.81713e-07	-0.14003	0.355	0.409	0.00665088
ARHGEF10	1.86861e-07	-0.100793	0.071	0.107	0.00683928
NDUFA4	2.18645e-07	0.114573	0.744	0.7	0.00800264
AAK1	2.28961e-07	-0.154901	0.217	0.267	0.00838021
ITGA5	2.42541e-07	-0.169594	0.331	0.383	0.00887724
SECTM1	2.4745e-07	0.117022	0.128	0.093	0.00905693
NCOA7	2.79854e-07	0.13706	0.553	0.502	0.0102429
SLC25A5	3.01265e-07	0.148743	0.456	0.408	0.0110266
CERT1	3.04242e-07	-0.109554	0.156	0.204	0.0111355
MAP1LC3A	3.17425e-07	0.121874	0.25	0.205	0.0116181
PLK2	3.19705e-07	0.187222	0.409	0.36	0.0117015
RAI14	3.19831e-07	-0.139042	0.274	0.328	0.0117061
MBTPS1	3.22966e-07	-0.110741	0.167	0.217	0.0118209
CD40	3.51798e-07	0.114362	0.225	0.18	0.0128761
XRN2	3.58426e-07	0.154586	0.454	0.404	0.0131187
CREBRF	3.62604e-07	-0.1538	0.252	0.304	0.0132717
SNRPB	3.83995e-07	0.122229	0.52	0.468	0.0140546
RND1	3.97596e-07	0.143265	0.139	0.102	0.0145524
HIPK1	4.12429e-07	-0.108123	0.113	0.155	0.0150953
FTX	4.30426e-07	-0.131398	0.17	0.217	0.015754
ADAM10	4.37247e-07	-0.137738	0.218	0.269	0.0160037
MGST2	4.92248e-07	0.137244	0.662	0.62	0.0180168
JAG2	5.57216e-07	-0.157617	0.132	0.172	0.0203947
NBL1	5.59518e-07	0.129361	0.4	0.351	0.0204789
NFE2L1	5.62644e-07	-0.175161	0.471	0.521	0.0205933
RUNX1T1	5.67159e-07	-0.119032	0.149	0.193	0.0207586
PPP3CA	5.6966e-07	-0.16111	0.449	0.497	0.0208501
CYB5R3	5.79235e-07	-0.146391	0.606	0.647	0.0212006
PGRMC2	6.27022e-07	-0.113362	0.194	0.244	0.0229496
COX6A1	6.40597e-07	0.130573	0.706	0.667	0.0234465
MRPL43	6.8671e-07	0.142891	0.267	0.223	0.0251343
ARHGDIB	7.11656e-07	0.164564	0.381	0.334	0.0260473
ATP5MC3	7.1881e-07	0.103989	0.34	0.289	0.0263092
TNFRSF1A	7.21827e-07	0.122187	0.408	0.359	0.0264196
PIEZO1	7.7319e-07	-0.147444	0.166	0.209	0.0282995
AGRN	8.1356e-07	-0.101185	0.073	0.107	0.0297771
CSDE1	8.15224e-07	-0.138332	0.544	0.595	0.029838
RGS3	8.19706e-07	-0.102967	0.092	0.129	0.0300021
SH3BP2	8.20227e-07	-0.104971	0.089	0.126	0.0300211
CDH5	9.14575e-07	-0.162676	0.402	0.451	0.0334744
RNF11	9.36048e-07	-0.105871	0.139	0.183	0.0342603
RALB	9.56222e-07	0.122119	0.296	0.251	0.0349987
MCTP1	9.93927e-07	0.150662	0.521	0.469	0.0363787
SEPTIN11	1.04298e-06	-0.100023	0.13	0.172	0.0381739
H2AFZ	1.0548e-06	0.147432	0.523	0.482	0.0386066
RALGDS	1.09063e-06	0.135481	0.328	0.279	0.0399183
SYNE2	1.10197e-06	-0.183548	0.732	0.751	0.0403331
EIF4G2	1.14401e-06	-0.136339	0.479	0.539	0.0418718
LAPTM4A	1.19886e-06	-0.106878	0.579	0.628	0.0438794
PMP22	1.20472e-06	0.122813	0.66	0.628	0.0440938
MRPL36	1.28813e-06	0.122763	0.211	0.171	0.0471467
TPD52L1	1.3007e-06	0.122966	0.313	0.267	0.0476069
CCSER2	1.44564e-06	-0.107445	0.137	0.18	0.0529119
SLC25A3	1.49856e-06	0.14615	0.693	0.659	0.0548487
COX5B	1.50663e-06	0.141205	0.708	0.676	0.0551441
HSPE1	1.57277e-06	0.108566	0.484	0.435	0.0575649
ECSCR	1.70255e-06	0.108116	0.819	0.795	0.0623151
CDC42BPA	1.73534e-06	-0.1176	0.16	0.204	0.0635152
SRP14	1.76176e-06	-0.414068	0.97	0.973	0.0644822
RAPGEF5	1.86372e-06	-0.115034	0.148	0.191	0.0682141
TSHZ2	1.94814e-06	0.148363	0.574	0.536	0.071304
RPL36AL	2.00388e-06	0.152742	0.809	0.793	0.0733439
MALT1	2.07776e-06	-0.116366	0.178	0.222	0.076048
MGMT	2.17219e-06	0.12993	0.415	0.369	0.0795043
UGP2	2.21454e-06	-0.1747	0.302	0.353	0.0810544
TNFRSF1B	2.22176e-06	0.109993	0.337	0.292	0.0813185
NAMPT	2.27046e-06	0.123518	0.265	0.222	0.083101
PACSIN2	2.30717e-06	-0.104596	0.126	0.166	0.0844449
VPS35	2.40241e-06	-0.154699	0.214	0.259	0.0879305
ASH1L	2.40813e-06	-0.107966	0.27	0.323	0.0881399
CYP1A1	2.4372e-06	0.132382	0.064	0.04	0.0892038
PHB2	2.47615e-06	0.143799	0.375	0.331	0.0906297
METTL7A	2.50551e-06	-0.142416	0.187	0.231	0.0917042
DYNC1H1	2.54093e-06	-0.136941	0.326	0.375	0.0930007
EEF2	2.68875e-06	0.111275	0.826	0.813	0.0984108
MAP3K1	3.05827e-06	-0.118531	0.152	0.195	0.111936
TMEM30A	3.15425e-06	-0.111449	0.225	0.273	0.115449
PARVA	3.18483e-06	-0.106354	0.135	0.175	0.116568
FTH1	3.21882e-06	-0.132913	0.98	0.98	0.117812
NCK1	3.22198e-06	0.144142	0.297	0.255	0.117928
KMT2A	3.36908e-06	-0.151058	0.351	0.4	0.123312
SECISBP2L	3.44593e-06	-0.112487	0.142	0.183	0.126124
LTBP3	3.5085e-06	-0.101875	0.129	0.169	0.128415
MALAT1	3.69203e-06	0.111041	1	0.999	0.135132
CAVIN1	3.7282e-06	-0.102502	0.901	0.916	0.136456
SNX9	3.75899e-06	-0.113934	0.183	0.226	0.137583
ATP5MF	3.76102e-06	0.10236	0.398	0.351	0.137657
MYBBP1A	3.77851e-06	0.108708	0.137	0.104	0.138297
NDUFB9	3.93934e-06	0.123621	0.509	0.469	0.144184
UBE2V1	3.94115e-06	0.154197	0.522	0.48	0.14425
ELK3	4.0339e-06	-0.142802	0.679	0.717	0.147645
EIF3G	4.11933e-06	0.120493	0.631	0.589	0.150771
RFK	4.19968e-06	-0.113454	0.09	0.123	0.153713
SNHG16	4.54108e-06	0.132533	0.446	0.403	0.166208
PYCARD	4.56756e-06	0.114738	0.201	0.163	0.167177
MRPS21	4.87567e-06	0.142655	0.402	0.36	0.178454
PDLIM5	4.98928e-06	-0.13684	0.333	0.378	0.182612
AKAP13	5.12241e-06	-0.113925	0.376	0.427	0.187485
SMIM14	5.26931e-06	-0.121017	0.152	0.193	0.192862
DPM3	5.41996e-06	0.122378	0.37	0.327	0.198376
TLN1	5.50212e-06	-0.123286	0.403	0.456	0.201383
N4BP2L2	5.5909e-06	-0.177082	0.504	0.555	0.204632
SNRPD2	5.6439e-06	0.105683	0.643	0.599	0.206572
HNRNPF	5.74173e-06	0.129139	0.397	0.356	0.210153
HSPA1A	5.94732e-06	0.298126	0.628	0.597	0.217678
RPS19BP1	6.04902e-06	0.125434	0.361	0.318	0.2214
TPI1	6.06707e-06	0.123862	0.553	0.507	0.222061
EIF2A	6.11342e-06	0.130296	0.348	0.305	0.223757
HERC2	6.25678e-06	-0.126218	0.237	0.286	0.229004
FGD5-AS1	6.35553e-06	-0.110127	0.262	0.312	0.232619
REST	6.66417e-06	-0.113642	0.173	0.215	0.243915
PUM1	6.68386e-06	-0.125025	0.232	0.28	0.244636
JAK1	6.98091e-06	0.117487	0.587	0.555	0.255508
CCDC68	7.03303e-06	-0.100418	0.152	0.193	0.257416
IMPDH2	7.09175e-06	0.118975	0.27	0.228	0.259565
AGTRAP	7.22783e-06	0.118756	0.242	0.202	0.264546
NEAT1	7.83905e-06	-0.191177	0.91	0.913	0.286917
PCAT19	7.84604e-06	0.122288	0.765	0.74	0.287173
RPS27L	7.88721e-06	0.122836	0.586	0.545	0.28868
SEC11A	8.23424e-06	0.112841	0.697	0.662	0.301382
EIF3I	8.53565e-06	0.116814	0.417	0.376	0.312413
PTMS	8.97738e-06	-0.103795	0.917	0.926	0.328581
ZNF706	9.05912e-06	-0.109179	0.411	0.465	0.331573
RELL1	9.06728e-06	0.124543	0.318	0.275	0.331872
CIRBP	9.13912e-06	0.105247	0.751	0.717	0.334501
SERINC3	9.14342e-06	-0.132231	0.413	0.463	0.334658
PRDX5	9.15632e-06	0.121874	0.497	0.455	0.33513
MYRIP	9.36202e-06	-0.122205	0.174	0.215	0.342659
TMEM256	9.51328e-06	0.131466	0.309	0.269	0.348196
NFAT5	9.52e-06	-0.126396	0.225	0.271	0.348441
TRIB1	9.62054e-06	0.132903	0.268	0.227	0.352121
MZT2B	9.62221e-06	0.117063	0.642	0.608	0.352182
RNH1	9.62709e-06	0.130563	0.496	0.457	0.352361
CBR3	1.05124e-05	0.127539	0.228	0.19	0.384763
UBE2D3	1.12073e-05	0.120429	0.555	0.515	0.4102
UXT	1.15756e-05	0.13299	0.525	0.485	0.423679
RPAP3	1.17743e-05	0.10899	0.131	0.101	0.430953
SEC61B	1.19959e-05	0.114781	0.589	0.545	0.439063
GABARAPL1	1.21568e-05	-0.113574	0.197	0.24	0.444952
GLG1	1.23236e-05	-0.10922	0.195	0.237	0.451056
DBI	1.30482e-05	0.130935	0.463	0.419	0.477577
MIER2	1.30513e-05	0.109357	0.127	0.097	0.477689
KMT2C	1.32366e-05	-0.10513	0.193	0.234	0.484471
UBL3	1.32655e-05	-0.109019	0.171	0.211	0.485532
DUSP1	1.38757e-05	0.141678	0.859	0.853	0.507865
G3BP2	1.398e-05	-0.109516	0.189	0.233	0.511683
NECAP2	1.41292e-05	0.104677	0.185	0.149	0.517144
QKI	1.45018e-05	-0.117083	0.393	0.444	0.530782
TLK1	1.45156e-05	-0.100211	0.156	0.194	0.531286
BZW1	1.4649e-05	-0.128377	0.383	0.43	0.536167
EXOC6	1.47443e-05	-0.111648	0.187	0.228	0.539658
RWDD1	1.48482e-05	0.15657	0.488	0.446	0.543457
GIMAP4	1.60245e-05	-0.11337	0.723	0.745	0.586514
COX5A	1.64425e-05	0.116088	0.464	0.42	0.60181
PPFIBP1	1.671e-05	-0.17013	0.329	0.372	0.611603
GSTK1	1.77899e-05	0.130706	0.469	0.428	0.651128
PLSCR4	1.799e-05	-0.129517	0.252	0.294	0.658453
TMEM43	1.87488e-05	-0.10291	0.255	0.3	0.686225
CHMP3	1.89202e-05	-0.111506	0.532	0.577	0.692499
FNIP2	1.99567e-05	-0.100566	0.168	0.209	0.730437
NTS	2.00762e-05	-0.146349	0.03	0.051	0.734808
ABLIM1	2.04077e-05	-0.139669	0.388	0.437	0.746941
KLF6	2.06599e-05	0.110602	0.742	0.705	0.756174
NOB1	2.09864e-05	0.108195	0.231	0.192	0.768123
LGALS9	2.12709e-05	-0.101147	0.168	0.207	0.778535
FOSB	2.17004e-05	0.174523	0.506	0.468	0.794255
DIAPH1	2.17913e-05	-0.107207	0.195	0.236	0.797582
PRKAR1A	2.21193e-05	-0.13482	0.288	0.334	0.809587
FIS1	2.36159e-05	0.113952	0.717	0.677	0.864365
PBX1	2.47042e-05	-0.134735	0.156	0.192	0.904197
LPP	2.47447e-05	-0.112983	0.193	0.233	0.905682
SNHG14	2.48431e-05	-0.116232	0.095	0.126	0.909282
SLFN5	2.60848e-05	0.111994	0.389	0.346	0.954729
GSDMD	2.63727e-05	0.123704	0.334	0.295	0.965266
CEBPD	2.66015e-05	0.167498	0.594	0.553	0.973642
PTTG1IP	2.66167e-05	-0.119552	0.559	0.597	0.974199
ARPP19	2.6779e-05	-0.113754	0.26	0.305	0.980139
A4GALT	2.68053e-05	0.129127	0.288	0.249	0.981101
RCN1	2.72211e-05	0.130986	0.412	0.371	0.996321
HOXD9	2.77687e-05	0.103499	0.322	0.281	1
ITM2B	3.10448e-05	-0.105621	0.998	0.994	1
EEA1	3.18138e-05	-0.131152	0.218	0.259	1
CD55	3.31077e-05	-0.111187	0.261	0.309	1
BCL3	3.3625e-05	0.145785	0.257	0.221	1
JUND	3.407e-05	0.176549	0.897	0.891	1
ANKRD11	3.41126e-05	-0.127093	0.347	0.396	1
DACH1	3.45069e-05	0.1035	0.147	0.117	1
BTG1	3.45519e-05	0.106617	0.725	0.706	1
RALY	3.48553e-05	0.107825	0.379	0.341	1
LIMS2	3.65018e-05	-0.116597	0.346	0.39	1
VPS28	3.90658e-05	0.105723	0.541	0.505	1
COX7A2L	3.948e-05	0.114077	0.438	0.398	1
PLAC9	4.06698e-05	-0.118617	0.244	0.287	1
SCAF11	4.08452e-05	-0.112746	0.428	0.474	1
DICER1	4.2783e-05	-0.125724	0.165	0.201	1
CCL2	4.36015e-05	-0.202686	0.208	0.245	1
ATP5MD	4.47964e-05	0.113246	0.592	0.561	1
TLE4	4.56027e-05	-0.100752	0.154	0.191	1
ATL3	4.91585e-05	-0.125524	0.225	0.263	1
ARHGEF12	5.06233e-05	-0.100154	0.241	0.285	1
DDT	5.15675e-05	0.115291	0.447	0.405	1
MT-ND2	5.46651e-05	-0.135449	0.996	0.994	1
RAPGEF3	5.54057e-05	0.130495	0.305	0.268	1
RSL1D1	5.60784e-05	0.118133	0.43	0.386	1
NEDD8	6.08623e-05	0.153232	0.614	0.59	1
LRP5	6.4733e-05	-0.108805	0.109	0.14	1
KAT6A	6.72532e-05	-0.10051	0.22	0.26	1
TBCA	6.74563e-05	0.100824	0.57	0.529	1
FLOT1	6.77879e-05	0.122594	0.514	0.482	1
CYB5A	6.79218e-05	0.129768	0.301	0.266	1
IGBP1	6.9946e-05	0.120352	0.301	0.266	1
MT-ND6	7.28483e-05	-0.103862	0.15	0.186	1
MYOF	7.28814e-05	-0.124733	0.366	0.406	1
NR1D2	7.31128e-05	-0.107475	0.216	0.255	1
ARID1B	7.578e-05	-0.105093	0.239	0.28	1
PDCD6	7.58972e-05	0.109255	0.388	0.346	1
SLC44A2	7.6272e-05	-0.108706	0.265	0.307	1
SERPINH1	7.78351e-05	0.121243	0.265	0.226	1
YWHAZ	8.10486e-05	-0.141247	0.506	0.541	1
NR3C1	8.19479e-05	-0.106925	0.282	0.323	1
CALR	9.52088e-05	0.150802	0.645	0.621	1
ANKRD29	9.65373e-05	0.11678	0.367	0.33	1
ST13	0.00010002	0.121529	0.71	0.678	1
NDUFB4	0.000100628	0.114953	0.588	0.547	1
VAT1	0.000101897	-0.102546	0.262	0.305	1
HNRNPU	0.000105635	-0.133244	0.549	0.593	1
TM9SF3	0.000106838	-0.113348	0.363	0.405	1
LRRC1	0.000113799	-0.102835	0.178	0.214	1
NASP	0.000114211	0.134264	0.591	0.562	1
TIMM10	0.00011459	0.112685	0.22	0.188	1
JUN	0.000115859	0.164495	0.927	0.922	1
ATP5F1C	0.000126514	0.106605	0.456	0.421	1
TMA7	0.000133326	0.113017	0.788	0.754	1
BAG3	0.000134803	0.110839	0.198	0.167	1
PCNP	0.00013544	-0.129987	0.328	0.368	1
NOTCH4	0.000135938	-0.128285	0.097	0.125	1
ANKRD10	0.000136724	0.129443	0.195	0.165	1
TNRC6B	0.000137574	-0.121615	0.397	0.436	1
TGFBR2	0.000140242	0.110743	0.829	0.809	1
SRRM1	0.000141238	0.144929	0.622	0.599	1
ANKRD17	0.000142174	-0.106307	0.142	0.175	1
IL1R1	0.00014391	-0.181578	0.432	0.461	1
CSNK1A1	0.000151965	-0.100736	0.441	0.487	1
PCM1	0.000153478	-0.113177	0.3	0.343	1
NDUFB10	0.000154754	0.110166	0.546	0.52	1
CDC37	0.000156591	0.117417	0.665	0.626	1
BCAS2	0.000160793	0.13799	0.201	0.172	1
MDM4	0.000165407	-0.104103	0.142	0.173	1
EPS8	0.000167045	0.100747	0.415	0.377	1
INPP1	0.000178004	0.112128	0.236	0.204	1
IRF2BP2	0.000179358	-0.111272	0.362	0.402	1
METTL5	0.000181061	0.104046	0.229	0.196	1
CAPZA2	0.000202459	-0.108089	0.395	0.435	1
NFKBIA	0.000213275	0.293203	0.69	0.683	1
SAP18	0.000218216	0.11533	0.571	0.547	1
VAMP2	0.000227795	0.129732	0.468	0.438	1
FBL	0.000234461	0.106627	0.484	0.451	1
ENO1	0.000257967	0.116195	0.607	0.581	1
PHIP	0.000258071	-0.106314	0.202	0.238	1
CEP68	0.000282265	-0.1082	0.267	0.306	1
EZR	0.000295346	-0.102284	0.214	0.251	1
SERP1	0.000300466	0.132646	0.413	0.379	1
ALDH2	0.000308073	-0.106892	0.159	0.189	1
UPF3A	0.000309256	0.111579	0.401	0.372	1
IER5L	0.000310565	0.118078	0.195	0.164	1
ANAPC11	0.000331169	0.108957	0.374	0.34	1
REXO2	0.000336214	0.103251	0.291	0.257	1
EIF3J	0.000355347	0.130269	0.415	0.383	1
UBL5	0.000372091	0.103304	0.666	0.641	1
TRIR	0.000381151	0.111879	0.618	0.591	1
KRT8	0.000386373	0.108253	0.213	0.181	1
HMGN3	0.000397643	-0.130845	0.431	0.472	1
RPS6KA3	0.000404089	-0.125434	0.219	0.253	1
CSNK2B	0.000406581	0.100066	0.367	0.334	1
ZEB1	0.000438523	-0.110669	0.357	0.393	1
TCF25	0.000442174	0.112197	0.446	0.414	1
MAGT1	0.000462692	-0.107425	0.171	0.202	1
MAP3K13	0.000475597	0.110148	0.163	0.137	1
TNXB	0.000495048	-0.106144	0.294	0.331	1
ITGB1BP1	0.000495182	0.100557	0.335	0.303	1
FAM174C	0.000515817	0.105939	0.222	0.193	1
GBP2	0.00052505	0.11342	0.374	0.343	1
VDAC2	0.000528215	0.101304	0.362	0.327	1
SRSF2	0.000534105	0.116798	0.401	0.367	1
H3F3B	0.000537341	0.127718	0.971	0.967	1
PHACTR2	0.000538699	-0.115056	0.405	0.442	1
PCDH19	0.000544525	-0.106714	0.171	0.201	1
TIMM8B	0.000558416	0.10213	0.271	0.242	1
TAF15	0.000563443	-0.100491	0.251	0.288	1
SRSF1	0.000566413	-0.113654	0.147	0.176	1
KLF9	0.000611893	-0.121097	0.548	0.586	1
LGALS1	0.00062436	-0.199584	0.394	0.432	1
UGCG	0.000663671	0.11241	0.189	0.161	1
COL18A1	0.000672664	-0.117806	0.524	0.563	1
NFIC	0.000688138	-0.123098	0.384	0.418	1
CLTA	0.000690895	0.121449	0.594	0.569	1
DDX21	0.000693542	0.10494	0.453	0.418	1
ZNHIT1	0.00071218	0.111561	0.585	0.551	1
AKR1C3	0.000719487	0.123363	0.538	0.508	1
SMIM10	0.000725859	0.109099	0.156	0.131	1
PA2G4	0.00074839	0.106036	0.553	0.522	1
POLR1D	0.0008085	0.10423	0.406	0.376	1
ELF1	0.00081619	-0.109696	0.301	0.337	1
HSPA8	0.000851446	0.107771	0.7	0.684	1
CFLAR	0.000910397	-0.102195	0.465	0.5	1
NDUFB11	0.00094663	0.104564	0.457	0.431	1
TPM4	0.000976836	-0.109618	0.707	0.731	1
RB1CC1	0.00100197	-0.114119	0.24	0.273	1
ATP1B3	0.00112209	-0.130998	0.354	0.385	1
DPYSL2	0.0011594	-0.105069	0.743	0.755	1
TMEM14C	0.00131772	0.125006	0.472	0.448	1
SPTLC2	0.00131854	-0.107295	0.204	0.234	1
DEPP1	0.00147979	-0.335165	0.402	0.427	1
SEPTIN10	0.00148351	0.113728	0.409	0.384	1
TFF3	0.0016067	-0.124194	0.486	0.515	1
RAP1B	0.00164852	-0.103849	0.438	0.473	1
ZFYVE21	0.00165396	-0.115354	0.324	0.356	1
PLP2	0.00169847	0.113375	0.352	0.324	1
DNAJA1	0.00172761	0.157471	0.626	0.623	1
STMN1	0.0018079	-0.117605	0.196	0.224	1
S100A6	0.0019424	-0.10728	1	1	1
BIRC3	0.00206575	0.103096	0.141	0.118	1
ZNF521	0.00216966	-0.101378	0.21	0.239	1
GIMAP1	0.00243952	0.108296	0.61	0.586	1
HSPA1B	0.00245461	0.186088	0.384	0.357	1
RAMP2	0.00253794	-0.109505	0.879	0.886	1
EIF3H	0.0027218	0.114325	0.543	0.526	1
RGCC	0.00319073	-0.13507	0.046	0.061	1
SNRPD1	0.00361787	0.107792	0.355	0.331	1
TXNDC17	0.00377134	0.10281	0.283	0.255	1
C2CD4B	0.00447978	0.22508	0.292	0.267	1
ATF3	0.00490332	0.262313	0.34	0.317	1
APEX1	0.0049505	0.104572	0.339	0.314	1
ACTN4	0.00552404	-0.120893	0.608	0.634	1
PALMD	0.00642611	-0.109878	0.72	0.732	1
AKAP9	0.00699222	-0.100804	0.455	0.48	1
TIMP3	0.00859136	-0.121667	0.816	0.82	1
LARP7	0.00935325	-0.105853	0.296	0.323	1
HEBP2	0.010661	-0.100853	0.399	0.424	1
BTG2	0.0114776	-0.139876	0.461	0.483	1
YPEL3	0.0129792	0.103881	0.39	0.369	1
LPCAT2	0.014058	-0.111694	0.192	0.212	1
HP1BP3	0.0143253	-0.101569	0.454	0.478	1
RBM17	0.0145867	0.110198	0.357	0.341	1
FABP4	0.0146911	0.254785	0.051	0.04	1
SRGN	0.0148967	-0.378705	0.333	0.344	1
CRYBG3	0.024557	-0.163754	0.343	0.364	1
IVNS1ABP	0.0255751	-0.102079	0.086	0.101	1
SPPL2A	0.0267371	-0.207004	0.189	0.209	1
GADD45B	0.0268983	0.217015	0.763	0.763	1
CD59	0.0344325	-0.103803	0.895	0.889	1
YWHAH	0.0349511	-0.100295	0.405	0.429	1
MT1X	0.0382355	0.240131	0.265	0.247	1
DNAJB1	0.0512551	0.133893	0.354	0.338	1
TFPI	0.0674335	-0.144684	0.645	0.637	1
PPA1	0.0734881	-0.132244	0.505	0.508	1
MT2A	0.0955715	0.401963	0.849	0.842	1
CXCL10	0.0959125	-0.112297	0.009	0.014	1
HSP90AA1	0.20944	0.109915	0.842	0.845	1
ICAM2	0.335978	-0.156717	0.416	0.42	1
SAT1	0.39071	-0.493967	0.741	0.711	1
ID3	0.39422	0.103261	0.841	0.845	1
ADGRF5	0.802654	-0.119094	0.315	0.306	1
CXCL9	0.832609	-0.360884	0.012	0.012	1
TSC22D1	0.905509	-0.173678	0.476	0.465	1
KLF4	0.984481	0.102706	0.494	0.511	1

## Sheet: Vein
Symbol	p_val	avg_log2FC	pct.1	pct.2	p_val_adj
CLU	0	1.8667	0.999	0.957	0
A2M	0	-1.4648	0.595	0.898	0
CLDN5	0	-1.51471	0.791	0.946	0
PERP	1.1937e-304	1.16883	0.642	0.278	4.36905e-300
VWF	9.90049e-303	1.16693	0.93	0.76	3.62368e-298
MMRN1	1.17094e-301	1.20629	0.756	0.444	4.28576e-297
IFI27	4.00413e-269	-0.957077	0.966	0.988	1.46555e-264
NR2F2	9.80458e-243	1.00153	0.724	0.431	3.58857e-238
AKR1C1	7.61462e-210	1.18667	0.545	0.254	2.78703e-205
GSN	2.46248e-201	-0.816915	0.856	0.95	9.01292e-197
HLA-C	3.24116e-201	-0.599641	0.972	0.988	1.1863e-196
BST2	1.32699e-191	-1.05392	0.277	0.559	4.8569e-187
GNG11	6.7699e-191	-0.631365	0.974	0.991	2.47785e-186
ENPP2	7.0443e-179	-1.26766	0.284	0.546	2.57829e-174
DAAM1	8.99496e-175	0.853549	0.703	0.45	3.29225e-170
ITM2B	6.64109e-170	0.501642	0.995	0.995	2.4307e-165
AKR1C2	1.31986e-150	0.938441	0.318	0.094	4.83083e-146
ADIRF	1.3807e-146	0.537455	0.997	0.987	5.0535e-142
ADGRF5	1.60741e-145	-0.836781	0.193	0.432	5.88327e-141
HLA-A	2.35829e-140	-0.517297	0.98	0.991	8.63157e-136
CYP1B1	1.24233e-135	1.03777	0.313	0.104	4.54707e-131
PTMA	4.67622e-128	-0.401285	0.999	1	1.71154e-123
CXCL12	1.75514e-123	-1.19156	0.05	0.22	6.42397e-119
CTSH	3.12693e-122	-0.743456	0.448	0.659	1.14449e-117
PRMT1	4.35465e-121	-0.680066	0.426	0.637	1.59385e-116
SOX17	6.15885e-120	-0.743308	0.097	0.29	2.2542e-115
TSC22D1	2.24486e-114	-0.934601	0.374	0.569	8.2164e-110
EFEMP1	8.00715e-113	1.05168	0.382	0.179	2.9307e-108
FILIP1	3.97134e-110	-0.520179	0.034	0.183	1.45355e-105
FBLN2	2.4124e-109	0.601234	0.419	0.202	8.82961e-105
HLA-B	1.03776e-108	-0.406531	0.992	0.994	3.79829e-104
RAMP3	4.0297e-103	0.586157	0.8	0.61	1.47491e-98
SCARA3	5.84043e-103	0.474162	0.217	0.057	2.13766e-98
SPRY1	7.6678e-101	-0.908777	0.262	0.456	2.80649e-96
HSPG2	2.06083e-100	0.618018	0.76	0.598	7.54286e-96
S100A4	3.66398e-100	-0.86794	0.644	0.783	1.34105e-95
COL15A1	4.97487e-100	-0.632711	0.329	0.534	1.82085e-95
CCL14	3.24969e-96	0.437088	0.993	0.95	1.18942e-91
IER3	1.35044e-95	0.947902	0.785	0.645	4.94276e-91
NNMT	3.12626e-94	0.729784	0.392	0.201	1.14424e-89
MGP	7.72022e-94	1.55994	0.929	0.892	2.82568e-89
MARCKS	3.52449e-93	0.620452	0.513	0.313	1.29e-88
IL1R1	5.86495e-93	0.58874	0.549	0.348	2.14663e-88
PTGIS	2.18969e-92	0.402795	0.143	0.021	8.01448e-88
NET1	1.91799e-91	0.54754	0.472	0.271	7.02003e-87
FAM13C	6.19773e-91	-0.639044	0.247	0.435	2.26843e-86
MMP28	1.16082e-88	0.529355	0.471	0.277	4.2487e-84
SRGN	1.71656e-88	-0.876683	0.254	0.432	6.28279e-84
ST8SIA6	1.12435e-87	0.388858	0.172	0.04	4.11523e-83
B2M	1.5454e-87	-0.258059	1	1	5.65632e-83
IL6ST	2.02229e-87	0.617839	0.657	0.498	7.40177e-83
NOTCH4	3.11954e-87	-0.42259	0.05	0.186	1.14178e-82
CPE	2.12943e-86	0.452798	0.121	0.013	7.79392e-82
ITGB4	7.40789e-86	0.573901	0.697	0.543	2.71136e-81
TMOD1	1.02034e-82	0.364576	0.179	0.047	3.73454e-78
DIXDC1	7.17957e-82	0.508988	0.368	0.19	2.62779e-77
PLCXD3	9.48651e-81	0.315727	0.101	0.007	3.47216e-76
MT-ND2	2.38084e-80	0.448577	0.996	0.993	8.7141e-76
SEMA3G	8.92522e-80	-0.360888	0.014	0.113	3.26672e-75
FAM107A	2.87893e-79	-0.443295	0.083	0.228	1.05372e-74
SAT1	6.03766e-79	-1.14156	0.668	0.775	2.20985e-74
VCAN	7.45606e-79	0.352191	0.12	0.017	2.72899e-74
HEY1	6.13114e-77	-0.390462	0.02	0.122	2.24406e-72
ADGRA2	2.13001e-76	0.435791	0.234	0.089	7.79604e-72
ACKR1	9.48299e-76	0.231758	0.984	0.856	3.47087e-71
MSX1	1.07504e-75	-0.351123	0.04	0.157	3.93475e-71
TMSB4X	3.54171e-75	0.27339	1	1	1.2963e-70
GPIHBP1	1.50533e-74	-0.383236	0.041	0.157	5.50965e-70
SULF1	2.57583e-74	0.385124	0.283	0.121	9.42778e-70
ARL4A	1.28544e-73	0.514859	0.689	0.542	4.70485e-69
PTMS	4.42049e-73	0.378762	0.941	0.904	1.61794e-68
ITIH5	5.13539e-72	-0.626012	0.119	0.265	1.8796e-67
CCDC85B	1.52434e-71	-0.441556	0.726	0.829	5.57924e-67
RBP7	3.85023e-71	-0.807479	0.219	0.379	1.40922e-66
ACKR3	4.11113e-71	0.356983	0.152	0.039	1.50471e-66
LYST	7.22458e-71	0.454425	0.265	0.117	2.64427e-66
S100A6	2.24093e-70	0.339573	1	1	8.20204e-66
CAV1	2.60313e-70	-0.488713	0.959	0.971	9.52773e-66
TFPI	5.76285e-70	0.522566	0.709	0.566	2.10926e-65
EPB41L3	1.03562e-68	0.399422	0.269	0.121	3.79048e-64
TSC22D3	2.70583e-68	0.539701	0.66	0.523	9.90362e-64
IGFBP3	5.64067e-68	-1.71753	0.057	0.171	2.06454e-63
SEC14L1	6.50963e-68	-0.523754	0.344	0.508	2.38259e-63
TSPAN13	1.30971e-65	-0.370709	0.088	0.22	4.79368e-61
IFITM1	1.83695e-65	-0.417176	0.267	0.436	6.72342e-61
SPARC	5.04891e-63	-0.578342	0.728	0.804	1.84795e-58
ADM5	7.91821e-63	-0.488637	0.17	0.32	2.89814e-58
HLA-DRB1	2.8289e-62	-0.49494	0.915	0.934	1.03541e-57
CAVIN2	4.46183e-62	0.496091	0.675	0.543	1.63307e-57
CRTAC1	1.28696e-61	0.322959	0.09	0.011	4.7104e-57
BHLHE41	5.80645e-61	0.331263	0.148	0.043	2.12522e-56
METRNL	1.18014e-60	0.452391	0.407	0.248	4.31942e-56
H3F3A	2.58661e-60	-0.351925	0.937	0.961	9.46725e-56
RAB11FIP1	7.15025e-60	0.325383	0.195	0.075	2.61706e-55
SELP	1.66023e-59	0.393092	0.391	0.231	6.07662e-55
RCAN2	1.77363e-59	-0.227836	0.012	0.088	6.49167e-55
PTPRE	8.56708e-59	0.412482	0.262	0.127	3.13564e-54
BMX	3.15135e-58	0.43911	0.314	0.171	1.15342e-53
ICAM2	5.59451e-58	-0.628957	0.352	0.49	2.04765e-53
DKK3	5.75599e-58	0.412404	0.216	0.092	2.10675e-53
RGCC	6.88094e-58	-0.387647	0.018	0.098	2.51849e-53
IFITM3	1.9656e-57	-0.303524	0.993	0.996	7.19429e-53
ITPR2	3.88432e-57	0.40492	0.336	0.189	1.4217e-52
TGFBR3	7.80102e-57	0.40236	0.6	0.439	2.85525e-52
SESN3	1.48464e-56	0.346861	0.226	0.099	5.43393e-52
LAP3	7.99401e-56	-0.45156	0.317	0.463	2.92589e-51
CRIM1	1.34321e-55	0.447118	0.606	0.469	4.91629e-51
ANGPT2	2.75911e-55	-0.752443	0.246	0.391	1.00986e-50
LY6E	2.78838e-55	-0.490973	0.74	0.821	1.02057e-50
WWP1	7.06319e-55	0.420368	0.452	0.3	2.5852e-50
MGLL	1.55537e-54	-0.512317	0.499	0.632	5.69281e-50
HLA-DMA	6.69787e-54	-0.445792	0.423	0.565	2.45149e-49
IFI6	2.81055e-53	-0.579508	0.333	0.473	1.02869e-48
GJC2	6.04134e-53	0.286027	0.138	0.043	2.21119e-48
CYGB	7.86477e-53	-0.258393	0.048	0.145	2.87859e-48
NFIA	1.86314e-52	0.477338	0.63	0.507	6.81927e-48
MIR99AHG	2.63139e-52	0.264784	0.116	0.03	9.63113e-48
GPM6A	4.23066e-52	0.243766	0.095	0.018	1.54846e-47
RSPO3	6.93922e-52	0.258268	0.086	0.014	2.53983e-47
CLDN11	3.37765e-51	0.335256	0.236	0.114	1.23625e-46
FGF2	3.63838e-51	0.444674	0.345	0.209	1.33168e-46
SNCA	4.70462e-51	0.32421	0.241	0.117	1.72194e-46
ESAM	5.19403e-51	-0.411935	0.498	0.632	1.90107e-46
SNCG	7.10202e-51	0.391233	0.683	0.544	2.59941e-46
TPM1	7.77855e-51	-0.376912	0.146	0.274	2.84703e-46
RASSF9	3.72225e-50	0.323622	0.245	0.122	1.36238e-45
NDRG4	5.97512e-50	0.2345	0.125	0.037	2.18695e-45
SERPING1	1.8133e-49	-0.408839	0.392	0.535	6.63686e-45
ARL6IP1	2.14851e-49	0.426598	0.611	0.478	7.86377e-45
BTNL9	4.98726e-49	-0.22364	0.01	0.073	1.82539e-44
IGFBP2	6.42277e-49	-0.411266	0.324	0.471	2.3508e-44
SKIL	6.99605e-49	0.400789	0.326	0.194	2.56062e-44
RFLNB	1.92101e-48	-0.299901	0.048	0.139	7.03108e-44
IL32	3.31896e-48	-0.555009	0.132	0.251	1.21477e-43
NEBL	3.87291e-48	-0.236911	0.021	0.095	1.41752e-43
FBN1	9.75769e-48	0.313778	0.182	0.077	3.57141e-43
LINC01197	1.26031e-47	0.222262	0.114	0.032	4.61285e-43
SH3BGRL2	1.54261e-47	0.354031	0.301	0.171	5.64611e-43
HLA-DPB1	1.90721e-47	-0.507958	0.584	0.678	6.98057e-43
ID2	2.15724e-47	0.462053	0.426	0.286	7.8957e-43
MEF2C	2.50244e-47	-0.422978	0.519	0.64	9.15916e-43
PLXDC2	5.49674e-47	0.310651	0.227	0.112	2.01186e-42
WWTR1	1.55696e-46	0.413313	0.566	0.433	5.69862e-42
PCDH19	2.55676e-45	0.321833	0.249	0.13	9.35799e-41
AHNAK	2.72333e-45	0.359829	0.872	0.816	9.96765e-41
PTP4A3	9.00196e-45	-0.245221	0.036	0.115	3.29481e-40
LRRC1	3.4068e-44	0.305774	0.262	0.141	1.24692e-39
THSD7A	2.51637e-43	-0.377163	0.196	0.322	9.21015e-39
S100A10	3.74687e-43	0.24304	0.994	0.985	1.37139e-38
TMEM178A	4.97326e-43	-0.170331	0.004	0.052	1.82026e-38
HLA-DPA1	9.0019e-43	-0.449283	0.704	0.773	3.29479e-38
EMCN	9.81558e-43	-0.383551	0.571	0.685	3.5926e-38
TXNIP	1.11928e-42	0.283379	0.987	0.972	4.09669e-38
EDN1	4.30962e-42	0.524109	0.616	0.5	1.57736e-37
DLL1	5.41839e-42	0.266513	0.159	0.066	1.98318e-37
RDX	1.57165e-41	-0.447838	0.536	0.638	5.7524e-37
BMPR2	1.71971e-41	0.402803	0.543	0.419	6.29433e-37
MT-ND1	1.82201e-41	0.317487	0.99	0.982	6.66874e-37
ISG15	2.35865e-41	-0.686129	0.314	0.438	8.6329e-37
BMP4	2.70609e-41	0.313566	0.163	0.071	9.90457e-37
C1orf54	3.54048e-41	-0.202275	0.031	0.103	1.29585e-36
NFE2L1	4.90472e-41	0.379598	0.563	0.444	1.79518e-36
FLNA	1.0263e-40	0.415777	0.517	0.39	3.75635e-36
SLPI	1.45151e-40	0.219865	0.112	0.036	5.31268e-36
SLC40A1	2.28165e-40	0.279272	0.203	0.101	8.35106e-36
ADRA2C	2.34606e-39	-0.157408	0.006	0.054	8.58681e-35
FOXC1	2.51948e-39	0.3331	0.375	0.251	9.22156e-35
ALDH1A2	2.87392e-39	0.221252	0.118	0.041	1.05188e-34
JAG2	3.76687e-39	-0.305179	0.109	0.213	1.37871e-34
PRXL2A	5.36114e-39	0.352958	0.579	0.453	1.96223e-34
LAMB1	5.55337e-39	0.27596	0.214	0.111	2.03259e-34
HLA-DRA	6.97703e-39	-0.426984	0.902	0.907	2.55366e-34
SPARCL1	8.17591e-39	-0.266163	0.997	1	2.99247e-34
PPL	9.9411e-39	0.309856	0.253	0.143	3.63854e-34
NQO1	1.13951e-38	-0.265695	0.085	0.177	4.17073e-34
RYR3	1.93813e-38	0.20343	0.101	0.031	7.09376e-34
SELENOW	7.76812e-38	-0.32369	0.912	0.935	2.84321e-33
SRP14	1.41552e-37	-0.647011	0.971	0.974	5.18093e-33
LMO2	1.75314e-37	0.347454	0.72	0.628	6.41668e-33
PALLD	1.88993e-37	0.284058	0.207	0.107	6.91734e-33
ELN	1.94953e-37	0.269057	0.239	0.133	7.13547e-33
PGM5	2.25926e-37	0.305556	0.253	0.144	8.26913e-33
PROX1	2.92744e-37	0.290896	0.197	0.1	1.07147e-32
RUNDC3B	4.04404e-37	-0.309505	0.111	0.21	1.48016e-32
C19orf33	4.57165e-37	-0.441393	0.119	0.218	1.67327e-32
LRIG1	1.03307e-36	0.269842	0.174	0.083	3.78115e-32
EFNA1	2.06119e-36	-0.36134	0.362	0.483	7.54415e-32
COL21A1	2.53589e-36	-0.186604	0.025	0.087	9.28163e-32
LPCAT2	2.72191e-36	-0.332783	0.154	0.26	9.96244e-32
ADGRL4	4.2516e-36	-0.336791	0.648	0.741	1.55613e-31
TMSB10	5.25873e-36	-0.21984	0.999	0.998	1.92475e-31
SERPINE1	6.24161e-36	0.410607	0.175	0.086	2.28449e-31
MYL9	1.04455e-35	-0.410145	0.211	0.323	3.82314e-31
ENTPD1	1.1677e-35	0.32561	0.393	0.273	4.27391e-31
MYL6	1.39669e-35	-0.250237	0.937	0.952	5.11201e-31
SLC41A3	1.62771e-35	0.25157	0.227	0.126	5.95757e-31
ALPL	1.98396e-35	-0.137219	0.005	0.048	7.2615e-31
F2R	2.02719e-35	0.268093	0.249	0.144	7.41972e-31
CD74	2.61071e-35	-0.306094	0.99	0.993	9.55546e-31
TIMP2	4.06033e-35	0.348759	0.541	0.423	1.48612e-30
CYTL1	5.75904e-35	-0.384889	0.173	0.281	2.10787e-30
KRT19	1.091e-34	-0.150909	0.005	0.046	3.99316e-30
ADGRG6	1.60313e-34	0.166523	0.075	0.019	5.8676e-30
CRYBG3	1.72136e-34	-0.423818	0.304	0.415	6.30033e-30
PLXNA4	2.51963e-34	0.111037	0.05	0.006	9.22208e-30
FTH1	3.76893e-34	0.257041	0.984	0.976	1.37946e-29
PRCP	4.61161e-34	0.250472	0.634	0.502	1.6879e-29
CALCRL	4.67542e-34	0.354231	0.464	0.346	1.71125e-29
FBLN5	7.28169e-33	-0.168179	0.011	0.058	2.66517e-28
CTTNBP2	1.47483e-32	0.224613	0.146	0.067	5.39802e-28
CX3CL1	2.08867e-32	-0.224187	0.033	0.095	7.64474e-28
CDON	2.19689e-32	0.157708	0.083	0.025	8.04083e-28
PLSCR4	2.36788e-32	0.295825	0.334	0.225	8.66669e-28
GAS6	3.23465e-32	0.360829	0.357	0.248	1.18391e-27
IL3RA	3.43757e-32	-0.310892	0.373	0.489	1.25818e-27
HRCT1	3.50428e-32	0.297497	0.246	0.148	1.2826e-27
PLLP	3.93667e-32	-0.217935	0.048	0.118	1.44086e-27
CLIC5	4.99256e-32	-0.108091	0.004	0.043	1.82733e-27
TMOD3	5.84092e-32	0.324282	0.715	0.634	2.13783e-27
IFI27L2	1.16684e-31	-0.232734	0.11	0.201	4.27076e-27
FILIP1L	1.24996e-31	0.328115	0.366	0.255	4.57498e-27
KRT7	1.25916e-31	0.218534	0.109	0.043	4.60866e-27
HLA-F	1.48986e-31	-0.311873	0.409	0.526	5.45305e-27
ACTN1	1.83921e-31	0.322959	0.578	0.471	6.73169e-27
ARL15	3.00198e-31	-0.347314	0.098	0.181	1.09875e-26
HMGB1	6.0372e-31	-0.235813	0.96	0.974	2.20968e-26
LDLR	6.60028e-31	-0.197701	0.079	0.16	2.41577e-26
LIMS1	1.34869e-30	0.326315	0.671	0.585	4.93634e-26
RPL28	2.2075e-30	-0.206263	0.997	0.998	8.07968e-26
CDO1	3.04129e-30	0.111038	0.04	0.003	1.11314e-25
TMEM47	3.59846e-30	-0.142918	0.021	0.072	1.31707e-25
CTSZ	3.60195e-30	0.335069	0.527	0.426	1.31835e-25
LHX6	4.15409e-30	0.223247	0.183	0.098	1.52044e-25
NUDT4	7.20941e-30	0.256625	0.188	0.103	2.63872e-25
TOX2	9.28993e-30	-0.144548	0.026	0.081	3.40021e-25
TSPAN15	1.07047e-29	-0.173272	0.048	0.115	3.91801e-25
PBX1	1.4081e-29	0.28238	0.224	0.134	5.15378e-25
CPXM2	3.02618e-29	0.258164	0.215	0.125	1.10761e-24
SLC16A14	3.0637e-29	-0.121707	0.02	0.07	1.12135e-24
LINC02147	3.24494e-29	0.141685	0.074	0.022	1.18768e-24
RHOC	3.47287e-29	-0.347265	0.548	0.637	1.2711e-24
LIFR	3.48755e-29	0.326489	0.671	0.568	1.27648e-24
ZNF521	3.52214e-29	0.27822	0.278	0.179	1.28914e-24
TUSC3	3.76058e-29	-0.175728	0.05	0.117	1.37641e-24
TNFRSF6B	5.44125e-29	-0.341236	0.088	0.167	1.99155e-24
TSPAN12	5.48443e-29	0.23287	0.261	0.162	2.00736e-24
METTL7A	6.15262e-29	0.26745	0.265	0.168	2.25192e-24
MYOF	8.82109e-29	0.294861	0.444	0.339	3.22861e-24
NR4A1	1.00265e-28	-0.359933	0.129	0.216	3.6698e-24
DUSP1	1.05317e-28	-0.472154	0.849	0.861	3.8547e-24
SPTAN1	1.9482e-28	0.324892	0.529	0.432	7.1306e-24
CFL1	2.10161e-28	-0.259777	0.847	0.881	7.6921e-24
LTBP2	2.17817e-28	0.136637	0.04	0.005	7.97231e-24
RPS7	2.55459e-28	-0.233546	0.99	0.993	9.35004e-24
EBF3	2.61341e-28	0.285499	0.302	0.202	9.56534e-24
PDE2A	3.19419e-28	0.290362	0.367	0.259	1.16911e-23
EFNB2	3.76839e-28	-0.406242	0.2	0.293	1.37927e-23
RAI14	4.03505e-28	0.282174	0.362	0.258	1.47687e-23
LAMA4	4.20899e-28	0.248551	0.256	0.161	1.54053e-23
LINC01013	4.55864e-28	-0.217008	0.061	0.13	1.66851e-23
CD300LG	5.87962e-28	-0.136155	0.007	0.044	2.152e-23
LDHA	6.37436e-28	0.262486	0.838	0.777	2.33308e-23
ITSN1	7.33102e-28	0.147701	0.109	0.045	2.68323e-23
FOXP1	9.30692e-28	0.301103	0.689	0.606	3.40643e-23
TUBB	9.6521e-28	0.263004	0.724	0.646	3.53277e-23
PCSK5	1.70418e-27	-0.16229	0.015	0.059	6.23748e-23
PPP1R14A	2.26542e-27	-0.127571	0.003	0.035	8.29167e-23
SYT15	2.54675e-27	0.177757	0.126	0.058	9.32135e-23
ABCB1	4.36118e-27	-0.331588	0.219	0.315	1.59624e-22
RALB	4.84233e-27	-0.252807	0.218	0.315	1.77234e-22
ANXA4	5.31851e-27	0.240638	0.309	0.21	1.94663e-22
TCIM	6.30378e-27	-0.234149	0.051	0.114	2.30725e-22
CAVIN3	6.57792e-27	-0.279277	0.422	0.525	2.40758e-22
AMIGO2	6.60907e-27	0.178262	0.111	0.048	2.41899e-22
CCDC3	6.79172e-27	0.293292	0.441	0.337	2.48584e-22
FAM107B	7.13157e-27	0.229838	0.207	0.122	2.61023e-22
MT-ND5	1.1224e-26	0.26885	0.972	0.956	4.1081e-22
HBEGF	1.19858e-26	-0.240017	0.09	0.165	4.38693e-22
PHLDA1	1.76743e-26	-0.238068	0.09	0.166	6.46898e-22
PRSS23	1.91966e-26	0.358402	0.454	0.358	7.02614e-22
HES4	2.66084e-26	-0.280428	0.057	0.121	9.73892e-22
PTPRB	2.75604e-26	0.290694	0.564	0.47	1.00874e-21
TAGLN2	3.05098e-26	-0.253875	0.88	0.912	1.11669e-21
GLS	3.16182e-26	0.284622	0.343	0.249	1.15726e-21
GPRC5B	3.18422e-26	-0.21577	0.099	0.177	1.16546e-21
MBP	3.85852e-26	0.104011	0.043	0.007	1.41226e-21
HLA-DQA1	3.86426e-26	-0.349162	0.237	0.333	1.41436e-21
HDGFL3	9.488e-26	0.284796	0.434	0.335	3.4727e-21
RASSF8	1.8453e-25	0.2013	0.16	0.087	6.75399e-21
MT-CO2	1.89373e-25	0.250142	0.997	0.993	6.93123e-21
LFNG	2.19333e-25	0.262598	0.307	0.211	8.02779e-21
FAM171A1	2.83293e-25	0.19937	0.16	0.087	1.03688e-20
GATA6	3.2619e-25	0.139653	0.08	0.029	1.19389e-20
SLC38A2	3.31321e-25	0.289194	0.456	0.36	1.21267e-20
MT-CO3	3.54626e-25	0.253287	0.994	0.991	1.29797e-20
NAA38	3.94701e-25	-0.270006	0.503	0.598	1.44465e-20
TYMP	4.18458e-25	-0.301461	0.286	0.384	1.5316e-20
TPT1	5.05841e-25	0.142983	1	1	1.85143e-20
SLC9A3R2	5.82117e-25	-0.741886	0.593	0.629	2.13061e-20
C3orf80	1.14754e-24	0.108635	0.055	0.014	4.20012e-20
COL4A2	1.15452e-24	-0.358293	0.293	0.386	4.22565e-20
TM4SF1	1.2831e-24	-0.321469	0.881	0.908	4.69628e-20
MYO1B	1.61628e-24	-0.135269	0.027	0.075	5.91576e-20
ID1	1.75155e-24	0.275119	0.878	0.832	6.41083e-20
PLS3	2.24294e-24	-0.3156	0.319	0.413	8.2094e-20
IL13RA1	2.65472e-24	0.256466	0.244	0.159	9.71652e-20
RASGRF2	2.83464e-24	-0.137759	0.043	0.1	1.03751e-19
ATOH8	3.86543e-24	-0.191618	0.07	0.137	1.41479e-19
TP53I11	4.47823e-24	-0.105143	0.02	0.063	1.63908e-19
CADM3-AS1	4.94404e-24	0.179492	0.112	0.052	1.80957e-19
SPECC1	5.18748e-24	-0.122679	0.023	0.069	1.89867e-19
SLC12A2	5.93788e-24	-0.174746	0.036	0.088	2.17332e-19
MARVELD1	5.97645e-24	0.140781	0.081	0.031	2.18744e-19
MALAT1	8.18168e-24	-0.200682	0.999	1	2.99458e-19
CCDC80	1.04991e-23	0.304989	0.203	0.124	3.84276e-19
VWA1	1.05286e-23	-0.315858	0.322	0.415	3.85359e-19
TBX1	1.08953e-23	0.297282	0.394	0.297	3.98777e-19
SERPINE2	1.87218e-23	-0.169692	0.008	0.041	6.85238e-19
ATP2A3	2.25099e-23	-0.181453	0.039	0.092	8.23884e-19
DBI	2.30968e-23	-0.260477	0.387	0.481	8.45365e-19
HOPX	2.95402e-23	0.153117	0.101	0.045	1.0812e-18
SEC61B	3.26154e-23	-0.264301	0.516	0.604	1.19376e-18
AOC3	4.65679e-23	-0.138414	0.031	0.079	1.70443e-18
PXDN	4.83411e-23	-0.197169	0.123	0.201	1.76933e-18
GUK1	5.2343e-23	0.223918	0.873	0.838	1.91581e-18
GNAI1	5.6491e-23	0.107979	0.052	0.014	2.06763e-18
EEF1A1	6.59492e-23	-0.152141	1	1	2.41381e-18
CLDN15	6.60782e-23	-0.213225	0.092	0.163	2.41853e-18
LRP5	7.51207e-23	0.214119	0.164	0.094	2.74949e-18
PRKAG2	8.48482e-23	0.225286	0.239	0.155	3.10553e-18
TLL1	1.00384e-22	0.169857	0.127	0.064	3.67415e-18
CEMIP2	1.04297e-22	-0.161733	0.055	0.113	3.81738e-18
ORAI1	1.13889e-22	-0.233994	0.228	0.32	4.16847e-18
MSRB3	1.2051e-22	0.269666	0.412	0.319	4.4108e-18
MAN1C1	1.30592e-22	0.113995	0.055	0.016	4.7798e-18
BAIAP2	2.06731e-22	0.2212	0.236	0.154	7.56655e-18
RFTN2	2.15125e-22	0.116932	0.068	0.024	7.87378e-18
ZBTB20	2.26152e-22	0.287106	0.491	0.401	8.27739e-18
GCHFR	2.64489e-22	0.215345	0.259	0.174	9.68055e-18
ATP5MC3	3.12353e-22	-0.204802	0.26	0.353	1.14324e-17
HAPLN3	3.22822e-22	0.209786	0.186	0.112	1.18156e-17
HLA-DQB1	3.65436e-22	-0.353531	0.42	0.507	1.33753e-17
IFI16	5.13986e-22	-0.251768	0.674	0.74	1.88124e-17
KCTD12	5.20107e-22	0.225533	0.784	0.718	1.90364e-17
SCN1B	5.26104e-22	0.240519	0.298	0.21	1.92559e-17
NIBAN1	5.47421e-22	-0.157028	0.039	0.09	2.00362e-17
RPS14	5.72664e-22	0.130079	1	1	2.09601e-17
IGFBP4	6.51981e-22	0.237155	0.901	0.865	2.38632e-17
ITM2A	6.7398e-22	-0.405304	0.655	0.695	2.46683e-17
CDC42EP1	7.0048e-22	-0.159228	0.072	0.136	2.56383e-17
TRABD2B	7.0347e-22	0.112861	0.059	0.019	2.57477e-17
SLCO2B1	8.14665e-22	-0.154023	0.045	0.097	2.98176e-17
MT-CYB	8.96638e-22	0.226546	0.997	0.996	3.28179e-17
ADGRL2	1.00013e-21	0.184937	0.174	0.103	3.66057e-17
NES	1.00588e-21	-0.171653	0.067	0.128	3.68163e-17
ECE1	1.01196e-21	0.24367	0.621	0.537	3.70388e-17
FAM89A	1.7102e-21	-0.164343	0.042	0.093	6.25949e-17
DOC2B	1.91674e-21	0.219689	0.268	0.183	7.01545e-17
IFIT1	1.95639e-21	-0.304426	0.151	0.229	7.1606e-17
ALDH2	2.14361e-21	0.204794	0.218	0.14	7.84583e-17
SAMD5	2.23664e-21	0.120465	0.062	0.021	8.18633e-17
UBC	2.36376e-21	-0.240251	0.972	0.972	8.6516e-17
PDIA5	2.47031e-21	0.215547	0.352	0.262	9.04157e-17
DSTN	2.65543e-21	0.224087	0.952	0.938	9.71914e-17
PPA1	3.00476e-21	-0.351649	0.468	0.549	1.09977e-16
SLC14A1	3.09061e-21	-0.114601	0.006	0.035	1.13119e-16
IER2	3.53639e-21	-0.306252	0.904	0.915	1.29436e-16
TIMP1	3.67159e-21	0.314785	0.76	0.708	1.34384e-16
RGS3	4.37165e-21	-0.188059	0.085	0.15	1.60007e-16
SNTB2	4.44875e-21	0.224754	0.372	0.281	1.62829e-16
BTG1	4.88644e-21	-0.324241	0.684	0.741	1.78848e-16
MAN1A1	6.39017e-21	0.190366	0.224	0.145	2.33887e-16
PARD6G	7.68802e-21	0.108935	0.071	0.027	2.81389e-16
ZFHX3	8.25759e-21	0.164689	0.109	0.054	3.02236e-16
SORT1	9.52941e-21	-0.115105	0.028	0.072	3.48786e-16
MT-ND4	9.61479e-21	0.227247	0.994	0.99	3.51911e-16
GNG12	1.13967e-20	0.220723	0.387	0.295	4.17132e-16
HSPB1	1.17285e-20	0.187224	0.94	0.91	4.29276e-16
RPS28	1.24094e-20	-0.17179	1	1	4.54196e-16
TM4SF18	1.31829e-20	-0.31197	0.28	0.364	4.82507e-16
THRB	1.34488e-20	0.10608	0.062	0.021	4.92238e-16
RAB3C	1.50178e-20	0.155259	0.101	0.048	5.49667e-16
H2AFZ	1.53728e-20	-0.2522	0.455	0.537	5.62659e-16
PSMB8	1.54359e-20	-0.210555	0.503	0.586	5.64968e-16
FHL1	1.77527e-20	-0.186722	0.093	0.158	6.49768e-16
ZNF706	1.83946e-20	0.250864	0.49	0.404	6.73262e-16
SERINC1	2.04141e-20	0.261606	0.543	0.462	7.47176e-16
CD59	2.95286e-20	0.247386	0.901	0.881	1.08078e-15
MEDAG	3.95562e-20	0.12137	0.084	0.036	1.4478e-15
DACH1	4.21259e-20	-0.202144	0.095	0.16	1.54185e-15
AKAP12	4.82549e-20	0.208657	0.199	0.127	1.76618e-15
ITGA5	5.79268e-20	0.254591	0.407	0.323	2.12018e-15
LNX1	6.00125e-20	-0.196244	0.086	0.148	2.19652e-15
NORAD	6.04198e-20	0.263016	0.525	0.447	2.21143e-15
AIF1L	6.35358e-20	-0.148322	0.045	0.095	2.32547e-15
MRPL33	9.75826e-20	-0.263053	0.438	0.517	3.57162e-15
DLL4	1.18094e-19	-0.201396	0.091	0.154	4.32235e-15
CD302	1.20871e-19	0.191873	0.232	0.155	4.42402e-15
CLEC2B	1.59367e-19	-0.241045	0.445	0.525	5.833e-15
FKBP11	1.65059e-19	0.220536	0.203	0.132	6.04132e-15
HOXD9	1.73406e-19	-0.226459	0.253	0.338	6.34685e-15
PLCB1	2.60335e-19	-0.199857	0.138	0.21	9.52851e-15
NUAK1	2.85218e-19	0.250482	0.475	0.392	1.04393e-14
BPTF	2.95078e-19	0.281026	0.443	0.362	1.08001e-14
H19	2.96969e-19	-0.166573	0.007	0.035	1.08694e-14
NRP2	3.47965e-19	0.225067	0.259	0.179	1.27359e-14
FLI1	4.0967e-19	0.201313	0.394	0.306	1.49943e-14
PECAM1	4.77223e-19	0.202548	0.939	0.925	1.74668e-14
LTBP1	5.70273e-19	0.171443	0.119	0.064	2.08726e-14
TRIM16	6.56878e-19	-0.12789	0.044	0.092	2.40424e-14
PDGFB	7.24441e-19	-0.291886	0.404	0.489	2.65153e-14
IL33	8.6305e-19	-0.245205	0.514	0.589	3.15885e-14
RRBP1	8.86338e-19	0.237763	0.562	0.483	3.24409e-14
MEGF6	9.86063e-19	0.159567	0.173	0.107	3.60909e-14
MAP1B	1.10903e-18	-0.100147	0.017	0.052	4.05916e-14
S100A16	1.13182e-18	-0.216383	0.545	0.624	4.14257e-14
AL583785.1	1.57847e-18	-0.168678	0.06	0.113	5.77737e-14
ADGRG1	1.95709e-18	-0.174226	0.132	0.202	7.16315e-14
PTGS2	2.19697e-18	0.307413	0.102	0.052	8.04111e-14
GPR146	2.21441e-18	-0.215112	0.181	0.255	8.10497e-14
ADIPOR2	2.96899e-18	-0.164542	0.077	0.135	1.08668e-13
POMP	3.20854e-18	-0.248269	0.451	0.529	1.17436e-13
SGMS2	3.32832e-18	0.122646	0.072	0.03	1.2182e-13
RPL18A	3.54192e-18	-0.173488	0.994	0.996	1.29638e-13
MAOA	3.88418e-18	0.156437	0.177	0.111	1.42165e-13
RPLP0	4.32187e-18	-0.209518	0.974	0.982	1.58185e-13
PLCB4	4.42634e-18	0.205153	0.22	0.148	1.62009e-13
SPTBN1	5.33286e-18	0.230898	0.76	0.706	1.95188e-13
IFI44L	7.42128e-18	-0.270207	0.226	0.303	2.71626e-13
LSR	7.82839e-18	-0.217076	0.206	0.282	2.86527e-13
PIEZO1	8.7673e-18	0.228606	0.23	0.16	3.20892e-13
GAPDH	8.81844e-18	0.15956	0.976	0.973	3.22764e-13
MEOX2	9.09289e-18	0.189354	0.273	0.194	3.32809e-13
CCDC68	9.12536e-18	0.193359	0.214	0.144	3.33997e-13
MX2	1.14618e-17	-0.218337	0.065	0.117	4.19512e-13
NKTR	1.23093e-17	0.262418	0.455	0.377	4.50531e-13
LGALS1	1.38824e-17	-0.461956	0.385	0.458	5.08109e-13
CYB5A	1.48314e-17	-0.201278	0.238	0.319	5.42845e-13
ARHGAP29	1.54952e-17	-0.255356	0.641	0.714	5.6714e-13
MT-CO1	1.75435e-17	0.20308	0.997	0.992	6.42111e-13
NUPR1	1.89023e-17	0.241324	0.42	0.338	6.91842e-13
MCTP1	2.1061e-17	-0.250205	0.445	0.527	7.70853e-13
CD93	2.11889e-17	-0.215807	0.461	0.54	7.75535e-13
PALMD	2.15843e-17	-0.291427	0.706	0.751	7.90007e-13
MAST4	2.17378e-17	-0.175339	0.115	0.179	7.95626e-13
ETS1	2.18927e-17	-0.260892	0.463	0.539	8.01294e-13
UGP2	2.76913e-17	0.284092	0.375	0.298	1.01353e-12
TRAPPC6A	3.02062e-17	0.192576	0.288	0.209	1.10558e-12
JAM3	4.74419e-17	-0.136512	0.089	0.148	1.73642e-12
SORBS2	4.7519e-17	-0.168914	0.115	0.179	1.73924e-12
CLEC3B	4.76268e-17	0.218201	0.365	0.284	1.74319e-12
TACSTD2	5.58181e-17	0.141283	0.128	0.074	2.043e-12
FGD5	6.09249e-17	0.229713	0.354	0.274	2.22991e-12
ABLIM1	6.34205e-17	0.227163	0.463	0.379	2.32126e-12
ACACB	6.52159e-17	0.159197	0.169	0.107	2.38697e-12
CD79B	1.01148e-16	-0.171767	0.161	0.232	3.7021e-12
MACF1	1.10095e-16	0.210672	0.55	0.475	4.02959e-12
SERTAD1	1.31976e-16	-0.30512	0.291	0.364	4.83047e-12
ALCAM	1.48691e-16	0.120686	0.082	0.039	5.44225e-12
ZDHHC17	1.58662e-16	0.190047	0.201	0.137	5.80719e-12
CYP1A1	1.84652e-16	-0.219463	0.029	0.067	6.75844e-12
FADS3	1.95024e-16	-0.13593	0.053	0.099	7.13806e-12
PFN1	2.0535e-16	-0.193904	0.712	0.763	7.51602e-12
FCGRT	2.60325e-16	-0.268943	0.608	0.672	9.52814e-12
JUND	2.63485e-16	-0.32803	0.892	0.894	9.64381e-12
RAB13	2.73699e-16	-0.243888	0.688	0.739	1.00177e-11
COL4A1	3.04723e-16	-0.316313	0.211	0.279	1.11532e-11
NAV1	3.5385e-16	-0.129151	0.064	0.114	1.29513e-11
HMGN3	3.94322e-16	0.252957	0.495	0.422	1.44326e-11
AHNAK2	4.25701e-16	0.20399	0.25	0.181	1.55811e-11
CCN2	4.30173e-16	-0.238227	0.769	0.83	1.57448e-11
PKIG	4.52609e-16	-0.209356	0.235	0.307	1.65659e-11
MT-ATP6	5.01886e-16	0.202462	0.995	0.995	1.83695e-11
FOXO1	5.04511e-16	0.217029	0.291	0.219	1.84656e-11
MBNL1	5.46951e-16	0.200121	0.725	0.681	2.0019e-11
SEMA6A	5.78045e-16	0.182991	0.252	0.181	2.1157e-11
COLEC12	8.25278e-16	0.112473	0.091	0.047	3.0206e-11
ITGA2	9.6961e-16	0.142822	0.161	0.102	3.54887e-11
IGKC	1.15004e-15	-0.194958	0.035	0.074	4.20926e-11
ARFGEF3	1.35418e-15	0.124299	0.108	0.06	4.95645e-11
PDLIM2	1.4207e-15	-0.166708	0.122	0.182	5.1999e-11
PIK3R3	1.46475e-15	-0.201579	0.222	0.295	5.36112e-11
CCND1	1.47413e-15	0.226782	0.343	0.264	5.39545e-11
RAB34	1.78845e-15	-0.127015	0.085	0.139	6.5459e-11
PREX1	1.82426e-15	-0.102229	0.026	0.06	6.67699e-11
CRIP2	1.86607e-15	-0.228449	0.778	0.812	6.83e-11
RSAD2	2.05709e-15	-0.126665	0.054	0.099	7.52916e-11
SCN3B	2.13296e-15	0.109739	0.094	0.049	7.80685e-11
IER5L	2.21222e-15	-0.18403	0.141	0.207	8.09694e-11
PKM	2.24855e-15	0.1829	0.559	0.488	8.2299e-11
PLVAP	2.76137e-15	-0.339226	0.736	0.748	1.01069e-10
NUCKS1	2.85773e-15	0.201367	0.806	0.766	1.04596e-10
MLEC	3.20139e-15	-0.141211	0.071	0.121	1.17174e-10
ZFP36L1	3.75819e-15	0.177723	0.775	0.705	1.37554e-10
HLA-DMB	3.92655e-15	-0.169549	0.165	0.231	1.43716e-10
CCL23	4.21206e-15	0.218607	0.282	0.208	1.54166e-10
NEURL1B	4.35479e-15	-0.164548	0.09	0.143	1.5939e-10
TPD52L1	5.11747e-15	0.17124	0.319	0.241	1.87305e-10
IQCK	6.93738e-15	-0.145179	0.065	0.112	2.53915e-10
HSPA2	8.78418e-15	-0.163823	0.18	0.248	3.2151e-10
KDR	9.04123e-15	-0.207883	0.21	0.279	3.30918e-10
HEG1	9.82376e-15	0.221863	0.499	0.427	3.59559e-10
TIMP3	1.17229e-14	-0.236649	0.799	0.84	4.29069e-10
NT5E	1.19271e-14	0.126745	0.124	0.074	4.36545e-10
SERPINB6	1.36283e-14	-0.188427	0.378	0.451	4.9881e-10
PSMB9	1.37635e-14	-0.219767	0.467	0.536	5.03759e-10
ARPC2	1.65377e-14	-0.204657	0.517	0.581	6.05296e-10
UACA	1.68639e-14	-0.197387	0.487	0.557	6.17235e-10
ZFYVE21	1.75937e-14	0.204546	0.38	0.31	6.43948e-10
HES1	2.31574e-14	0.247644	0.655	0.574	8.47584e-10
CFH	2.43564e-14	0.180233	0.172	0.114	8.91468e-10
NME4	2.82949e-14	-0.10998	0.074	0.123	1.03562e-09
TEK	3.15621e-14	0.164698	0.218	0.156	1.1552e-09
LTC4S	3.77639e-14	0.130167	0.226	0.161	1.3822e-09
MMP2	4.20993e-14	-0.119552	0.033	0.069	1.54088e-09
OLFM1	4.27772e-14	0.164801	0.375	0.298	1.56569e-09
EXOC3L2	4.38255e-14	-0.101452	0.028	0.062	1.60406e-09
IFIT3	4.79479e-14	-0.273124	0.206	0.271	1.75494e-09
PTPRG	4.96691e-14	-0.121935	0.054	0.097	1.81794e-09
SNAI1	4.98885e-14	-0.13416	0.086	0.137	1.82597e-09
HYAL2	5.29211e-14	0.265682	0.622	0.568	1.93696e-09
NFAT5	5.37445e-14	0.188587	0.29	0.222	1.9671e-09
CCDC71L	6.05569e-14	0.162436	0.217	0.155	2.21644e-09
FAM167B	6.74887e-14	-0.113634	0.051	0.093	2.47015e-09
MYRIP	7.69945e-14	0.181291	0.233	0.169	2.81808e-09
CMIP	8.04861e-14	0.209672	0.434	0.362	2.94587e-09
SOX4	8.29443e-14	0.264701	0.374	0.301	3.03585e-09
FLT1	8.45075e-14	-0.243907	0.387	0.458	3.09306e-09
FLNB	9.32199e-14	0.194613	0.405	0.333	3.41194e-09
COBLL1	1.01878e-13	-0.168877	0.208	0.275	3.72883e-09
ENG	1.28101e-13	0.156491	0.826	0.765	4.68862e-09
CCN1	1.2859e-13	-0.402201	0.262	0.328	4.70651e-09
LBH	1.29843e-13	0.13661	0.148	0.096	4.75239e-09
COX17	1.3078e-13	-0.19613	0.283	0.352	4.78666e-09
ETS2	1.35871e-13	-0.261767	0.598	0.645	4.973e-09
CAPNS1	1.41719e-13	0.208508	0.662	0.61	5.18707e-09
LINC02185	1.53733e-13	-0.190768	0.182	0.246	5.62678e-09
EMILIN2	1.91349e-13	-0.150273	0.085	0.135	7.00357e-09
RPS8	1.99783e-13	-0.153423	1	1	7.31226e-09
SGK1	2.03601e-13	-0.158884	0.093	0.144	7.45201e-09
PLPP3	2.16023e-13	0.176122	0.142	0.092	7.90666e-09
SPATA13	2.20757e-13	0.136105	0.11	0.066	8.07992e-09
MX1	2.26212e-13	-0.239631	0.23	0.294	8.2796e-09
RPS20	2.46068e-13	0.124817	0.984	0.979	9.00632e-09
PPP1R14B	2.53563e-13	0.179732	0.587	0.513	9.28067e-09
CAVIN1	2.53748e-13	0.149196	0.921	0.901	9.28741e-09
ADAMTS6	2.65242e-13	-0.143598	0.056	0.098	9.70811e-09
CEBPD	2.68856e-13	0.164964	0.601	0.529	9.84041e-09
MBNL2	3.13469e-13	0.192655	0.336	0.269	1.14733e-08
SLC38A1	3.37313e-13	0.13835	0.152	0.099	1.2346e-08
CHD9	3.48312e-13	0.166861	0.429	0.358	1.27486e-08
RPL8	3.57588e-13	-0.149924	0.998	0.999	1.30881e-08
SLFN5	3.58748e-13	-0.188579	0.324	0.397	1.31305e-08
ADRB2	3.84392e-13	-0.166862	0.111	0.163	1.40691e-08
COX7A2	4.24759e-13	-0.177919	0.629	0.685	1.55466e-08
AGRN	5.13553e-13	0.146344	0.119	0.073	1.87966e-08
SUN2	5.18655e-13	0.179186	0.314	0.247	1.89833e-08
IRF9	5.47771e-13	-0.158303	0.195	0.259	2.0049e-08
SLCO2A1	5.65323e-13	0.159063	0.177	0.122	2.06914e-08
ERAP2	6.11276e-13	0.141892	0.181	0.127	2.23733e-08
STARD9	6.15281e-13	0.15098	0.208	0.15	2.25199e-08
RPS4Y1	6.25031e-13	-0.198795	0.783	0.811	2.28768e-08
SYNE1	7.37055e-13	0.190054	0.304	0.238	2.69769e-08
FOSB	8.46313e-13	-0.249799	0.45	0.511	3.09759e-08
S1PR1	8.52434e-13	0.176557	0.382	0.316	3.11999e-08
CD55	8.63581e-13	0.18117	0.327	0.259	3.16079e-08
ANGPTL2	1.07798e-12	-0.118699	0.086	0.135	3.94552e-08
C12orf57	1.12777e-12	-0.204093	0.455	0.527	4.12774e-08
ASS1	1.29415e-12	-0.15676	0.135	0.19	4.73672e-08
GIMAP6	1.40153e-12	0.187052	0.45	0.383	5.12974e-08
MLPH	1.42496e-12	0.126911	0.158	0.106	5.21549e-08
EGFL7	1.45049e-12	-0.188812	0.878	0.903	5.30895e-08
ARPC3	1.47289e-12	-0.194469	0.555	0.617	5.39093e-08
EPHX1	1.51219e-12	-0.205546	0.203	0.261	5.53475e-08
TEAD1	1.60586e-12	0.15119	0.165	0.113	5.87761e-08
EZR	1.64024e-12	0.180495	0.271	0.206	6.00344e-08
ZFP36	1.67034e-12	-0.337998	0.717	0.739	6.11362e-08
GNAL	1.78989e-12	0.106163	0.084	0.047	6.55116e-08
CYBA	1.83377e-12	-0.105328	0.072	0.117	6.7118e-08
PLXND1	1.9716e-12	0.219808	0.451	0.384	7.21624e-08
RCAN1	2.25463e-12	-0.262653	0.13	0.181	8.25216e-08
CYSLTR1	2.30731e-12	-0.105144	0.047	0.085	8.44499e-08
EPHB4	2.41161e-12	0.172866	0.308	0.242	8.82672e-08
SWAP70	2.4895e-12	-0.200302	0.334	0.402	9.11182e-08
MYC	2.57393e-12	-0.145205	0.154	0.212	9.42083e-08
PELI2	2.80819e-12	0.109815	0.101	0.059	1.02783e-07
TRIM56	2.87901e-12	0.171522	0.314	0.249	1.05375e-07
ATP2B1	3.09162e-12	0.192868	0.382	0.315	1.13156e-07
ABHD17A	3.2202e-12	-0.158769	0.289	0.356	1.17863e-07
KLF9	3.23059e-12	0.21794	0.604	0.543	1.18243e-07
SYT1	4.25949e-12	-0.1472	0.027	0.057	1.55901e-07
POLE4	4.39652e-12	-0.180556	0.408	0.477	1.60917e-07
UBL5	4.43324e-12	-0.185408	0.623	0.675	1.62261e-07
SLC44A1	4.49736e-12	0.15294	0.183	0.129	1.64608e-07
CD151	4.53251e-12	0.1811	0.775	0.73	1.65894e-07
XAF1	4.74283e-12	-0.222605	0.301	0.364	1.73592e-07
PITPNC1	5.22621e-12	-0.143019	0.117	0.168	1.91285e-07
FN1	5.48402e-12	-0.555412	0.098	0.144	2.00721e-07
LINC01116	5.51556e-12	-0.149553	0.176	0.235	2.01875e-07
FRMD4B	5.6774e-12	0.184434	0.331	0.265	2.07799e-07
EEPD1	5.74876e-12	-0.101301	0.034	0.066	2.1041e-07
CD34	6.09958e-12	-0.170946	0.856	0.892	2.23251e-07
DAD1	6.17519e-12	-0.176535	0.563	0.616	2.26018e-07
EIF4B	7.08951e-12	0.181546	0.617	0.56	2.59483e-07
TACC1	7.23485e-12	0.193537	0.614	0.558	2.64803e-07
ARPC5L	7.52888e-12	-0.164608	0.242	0.307	2.75565e-07
EXOC6	7.63659e-12	0.134509	0.244	0.184	2.79507e-07
GADD45B	7.67825e-12	0.117846	0.795	0.729	2.81032e-07
MAP1LC3B	8.74202e-12	-0.215064	0.532	0.585	3.19967e-07
IFITM2	8.82284e-12	-0.152935	0.929	0.939	3.22925e-07
ATP5PF	9.26937e-12	-0.189282	0.61	0.662	3.39268e-07
APLP2	9.50468e-12	-0.228458	0.534	0.59	3.47881e-07
PRDX4	9.98162e-12	-0.188805	0.368	0.436	3.65337e-07
MAP4K3-DT	1.0591e-11	-0.134119	0.075	0.118	3.87639e-07
ELK3	1.19954e-11	0.187612	0.726	0.682	4.39045e-07
CAPG	1.23588e-11	0.120045	0.17	0.119	4.52345e-07
TSPAN18	1.50693e-11	0.144045	0.271	0.207	5.51551e-07
ACTB	1.64553e-11	-0.175211	0.954	0.958	6.02281e-07
TXNDC5	1.65343e-11	0.13768	0.223	0.165	6.05172e-07
FEZ2	1.70375e-11	-0.179924	0.3	0.362	6.23588e-07
TPST2	1.75958e-11	0.13357	0.256	0.195	6.44022e-07
CD81	1.77642e-11	-0.184468	0.826	0.85	6.50187e-07
NDRG1	2.07402e-11	0.199192	0.508	0.446	7.59113e-07
ARL4C	2.37392e-11	0.114369	0.157	0.108	8.6888e-07
CCDC69	2.75692e-11	0.169168	0.444	0.38	1.00906e-06
LUZP1	2.84173e-11	-0.174069	0.321	0.383	1.0401e-06
PHIP	2.97736e-11	0.144284	0.256	0.196	1.08974e-06
ATOX1	3.18143e-11	-0.191501	0.462	0.523	1.16444e-06
TMOD2	3.34053e-11	0.121187	0.112	0.071	1.22267e-06
MAML2	4.06328e-11	-0.137494	0.125	0.175	1.4872e-06
VAT1	4.90017e-11	0.156179	0.322	0.26	1.79351e-06
ACTN4	5.07741e-11	-0.202289	0.603	0.65	1.85838e-06
NUDT14	5.7402e-11	-0.143384	0.17	0.226	2.10097e-06
KRT10	5.76832e-11	-0.143433	0.272	0.337	2.11126e-06
HMGXB3	6.09408e-11	-0.138904	0.094	0.139	2.23049e-06
FDPS	6.23083e-11	-0.201194	0.382	0.442	2.28055e-06
SKI	7.13301e-11	0.137147	0.207	0.154	2.61075e-06
HOMER3	7.5929e-11	0.116185	0.153	0.106	2.77908e-06
STX7	8.449e-11	0.155705	0.196	0.144	3.09242e-06
INHBB	8.64163e-11	-0.152142	0.09	0.133	3.16292e-06
SNED1	8.79529e-11	0.116902	0.111	0.071	3.21916e-06
C1orf21	1.0447e-10	-0.201326	0.298	0.356	3.82369e-06
SLC50A1	1.07397e-10	-0.101053	0.075	0.115	3.93084e-06
LXN	1.13418e-10	-0.10348	0.068	0.107	4.1512e-06
TCN2	1.2345e-10	0.144934	0.146	0.102	4.51838e-06
VEGFC	1.30243e-10	0.122163	0.174	0.126	4.76702e-06
CD40	1.3047e-10	-0.128883	0.168	0.222	4.77534e-06
DIAPH1	1.3376e-10	0.152801	0.25	0.194	4.89574e-06
PICALM	1.3703e-10	-0.1437	0.194	0.25	5.01543e-06
VSIR	1.3881e-10	-0.153525	0.241	0.301	5.08059e-06
RHOA	1.47287e-10	-0.164031	0.74	0.776	5.39084e-06
DDIT4	1.50417e-10	0.175788	0.289	0.231	5.50543e-06
CRTAP	1.51771e-10	0.177532	0.441	0.38	5.55497e-06
ENDOD1	1.58225e-10	0.160409	0.298	0.238	5.79118e-06
SOCS3	1.63667e-10	-0.35878	0.749	0.765	5.99037e-06
CDS2	1.64279e-10	-0.125339	0.101	0.146	6.01279e-06
NDUFA7	1.83873e-10	-0.138271	0.225	0.284	6.72993e-06
PXDC1	1.8446e-10	0.129171	0.192	0.142	6.75142e-06
EPAS1	2.0377e-10	-0.194526	0.617	0.666	7.45817e-06
PNP	2.39118e-10	-0.148864	0.18	0.234	8.75194e-06
CSF2RB	2.50092e-10	0.150707	0.198	0.148	9.1536e-06
RUNX1T1	2.67699e-10	0.153245	0.204	0.154	9.79806e-06
RAPH1	2.87249e-10	0.107556	0.099	0.062	1.05136e-05
CD320	3.01364e-10	-0.206857	0.445	0.506	1.10302e-05
DIAPH2	3.14686e-10	-0.117576	0.193	0.248	1.15178e-05
MAP3K1	3.165e-10	0.134787	0.207	0.155	1.15842e-05
APP	3.24445e-10	0.16256	0.74	0.696	1.1875e-05
RASA4	3.40064e-10	0.13973	0.184	0.135	1.24467e-05
AP2S1	3.61862e-10	-0.146654	0.301	0.36	1.32445e-05
TACR1	3.81647e-10	-0.132752	0.188	0.244	1.39687e-05
SEMA6B	3.85884e-10	-0.112709	0.107	0.152	1.41237e-05
RPL41	4.04239e-10	-0.131425	1	1	1.47956e-05
EMP3	4.19585e-10	-0.213967	0.078	0.117	1.53572e-05
LPAR6	4.30454e-10	-0.173445	0.345	0.405	1.57551e-05
CELF2	4.49211e-10	0.156515	0.26	0.206	1.64416e-05
KLF4	4.55351e-10	0.106189	0.539	0.471	1.66663e-05
DYNC1H1	4.81113e-10	0.160394	0.388	0.33	1.76092e-05
DIPK2B	4.86245e-10	0.175553	0.459	0.405	1.77971e-05
JUNB	4.92173e-10	-0.273281	0.919	0.925	1.8014e-05
GBP4	5.18258e-10	0.15645	0.44	0.375	1.89688e-05
CASC4	5.25047e-10	0.125821	0.198	0.148	1.92172e-05
SOCS2	5.28114e-10	-0.162398	0.158	0.21	1.93295e-05
ANXA2	5.30289e-10	0.157508	0.907	0.892	1.94091e-05
CALM1	5.6158e-10	-0.177034	0.942	0.947	2.05544e-05
APOLD1	5.83908e-10	-0.178917	0.152	0.202	2.13716e-05
HCP5	6.16905e-10	-0.11149	0.096	0.14	2.25793e-05
RABAC1	7.33668e-10	-0.153973	0.665	0.709	2.6853e-05
TPD52	7.53213e-10	0.127002	0.193	0.144	2.75684e-05
PARVA	8.2269e-10	0.133573	0.186	0.137	3.01113e-05
PLEC	8.51557e-10	0.200757	0.492	0.436	3.11679e-05
FBXO31	9.19044e-10	-0.12978	0.114	0.159	3.36379e-05
CAST	9.75306e-10	0.146485	0.854	0.834	3.56972e-05
CALR	1.0076e-09	-0.201581	0.61	0.648	3.6879e-05
ELK4	1.0222e-09	0.124119	0.261	0.206	3.74134e-05
NHSL2	1.09715e-09	0.131259	0.22	0.169	4.0157e-05
FAM210B	1.13111e-09	0.136237	0.245	0.193	4.13999e-05
CD47	1.23133e-09	0.126435	0.246	0.193	4.5068e-05
SCARB1	1.23362e-09	-0.154793	0.279	0.336	4.51516e-05
FAM3C	1.4107e-09	0.134255	0.235	0.184	5.16332e-05
JAG1	1.41311e-09	-0.317245	0.159	0.205	5.17211e-05
ZMIZ1	1.51005e-09	0.118764	0.278	0.223	5.52693e-05
RPS11	1.58091e-09	0.103558	0.991	0.988	5.78628e-05
RRAS	1.65878e-09	-0.136811	0.241	0.298	6.07131e-05
FOS	1.70347e-09	-0.310326	0.932	0.934	6.23487e-05
SH3BGRL3	1.81631e-09	0.166676	0.871	0.849	6.64786e-05
ROBO4	1.93551e-09	0.172967	0.44	0.383	7.08417e-05
PLK2	2.1802e-09	-0.183627	0.347	0.405	7.97976e-05
OCIAD2	2.20427e-09	-0.184653	0.286	0.338	8.06787e-05
LGALS3	2.24137e-09	-0.168246	0.964	0.968	8.20364e-05
GFOD1	2.44848e-09	-0.130823	0.148	0.196	8.96169e-05
CCNI	2.60515e-09	0.145952	0.725	0.691	9.53513e-05
HSD17B12	2.74266e-09	0.1336	0.378	0.317	0.000100384
CAV2	2.74351e-09	-0.174705	0.515	0.568	0.000100415
SERINC3	2.82154e-09	0.17041	0.474	0.419	0.000103271
EPSTI1	2.9194e-09	-0.103747	0.059	0.093	0.000106853
TMEM43	3.13788e-09	0.129683	0.313	0.258	0.00011485
SPTLC2	3.1712e-09	0.15147	0.248	0.199	0.000116069
RELL1	3.18647e-09	-0.147749	0.261	0.317	0.000116628
WDFY1	3.25077e-09	-0.103214	0.11	0.153	0.000118981
MT-ND4L	3.2623e-09	0.162891	0.728	0.676	0.000119404
ST3GAL1	3.37425e-09	0.102261	0.116	0.078	0.000123501
MT-ND3	3.6558e-09	0.138194	0.995	0.99	0.000133806
ADH5	3.86054e-09	-0.112477	0.16	0.209	0.0001413
TIMM8B	3.87647e-09	-0.129442	0.225	0.278	0.000141883
GALNT1	4.24658e-09	0.169763	0.196	0.15	0.000155429
SERPINH1	4.27641e-09	-0.138819	0.212	0.267	0.000156521
STMN1	4.34389e-09	-0.169251	0.192	0.24	0.000158991
KLHL5	4.38921e-09	-0.140199	0.125	0.17	0.000160649
MALT1	4.43807e-09	0.134908	0.232	0.183	0.000162438
MIDN	4.70308e-09	-0.195259	0.368	0.419	0.000172137
RBM17	4.72471e-09	-0.197355	0.322	0.371	0.000172929
NTN4	4.74175e-09	0.163143	0.257	0.207	0.000173553
ANKRD10	4.75228e-09	-0.140665	0.152	0.198	0.000173938
LDLRAD4	4.854e-09	0.10509	0.135	0.095	0.000177661
PDLIM7	5.00431e-09	0.113063	0.151	0.109	0.000183163
TNFRSF1B	5.11103e-09	-0.135163	0.28	0.334	0.000187069
ZBTB38	5.13933e-09	0.159209	0.409	0.354	0.000188105
KNOP1	5.19143e-09	-0.125626	0.195	0.246	0.000190012
CSDE1	5.2998e-09	0.148814	0.605	0.552	0.000193978
TUBA1C	5.58902e-09	-0.121626	0.123	0.166	0.000204564
ZNF385D	5.80308e-09	-0.145484	0.251	0.305	0.000212399
CPNE2	5.81728e-09	-0.101665	0.111	0.153	0.000212918
SNX3	5.91068e-09	-0.197168	0.466	0.515	0.000216337
RILPL2	6.25634e-09	-0.12384	0.319	0.374	0.000228988
SNHG5	6.41314e-09	0.132605	0.81	0.786	0.000234727
FGD5-AS1	6.53572e-09	0.116321	0.323	0.267	0.000239214
SNRPB	7.06716e-09	-0.165591	0.46	0.511	0.000258665
ARRDC3	7.47312e-09	-0.131866	0.102	0.142	0.000273524
PFKP	7.88418e-09	0.127151	0.261	0.208	0.000288569
RPL29	8.17072e-09	-0.135307	0.994	0.996	0.000299056
FTX	1.0301e-08	0.162187	0.225	0.178	0.000377025
GMDS	1.04087e-08	0.120653	0.157	0.116	0.000380969
NUDT3	1.06193e-08	0.112818	0.17	0.126	0.000388676
ARID1B	1.08612e-08	0.151504	0.292	0.241	0.000397531
PSME2	1.12475e-08	-0.177878	0.422	0.475	0.00041167
RERE	1.18787e-08	0.135493	0.308	0.254	0.000434773
SDF2L1	1.20992e-08	-0.109132	0.128	0.172	0.000442843
CDV3	1.24244e-08	0.168871	0.49	0.44	0.000454745
PHACTR2	1.30388e-08	0.17252	0.455	0.404	0.000477232
DPP7	1.32927e-08	-0.134356	0.223	0.274	0.000486525
SMAD9	1.3634e-08	0.100906	0.143	0.103	0.000499019
LRRC32	1.40768e-08	0.115384	0.28	0.227	0.000515224
MPDZ	1.54148e-08	0.137708	0.234	0.186	0.000564199
C8orf33	1.59654e-08	-0.151451	0.232	0.282	0.000584349
ABHD2	1.72715e-08	0.102718	0.132	0.094	0.000632155
TSPYL2	1.81786e-08	0.122025	0.138	0.099	0.000665354
TAF15	1.84739e-08	0.15726	0.302	0.249	0.000676164
TUBA4A	1.93123e-08	-0.105159	0.14	0.185	0.000706848
ITPRID2	1.98146e-08	-0.153252	0.393	0.446	0.000725233
DHRS7	2.0537e-08	0.154345	0.455	0.406	0.000751676
ODF3B	2.18328e-08	-0.131255	0.178	0.225	0.000799104
CD99	2.4512e-08	-0.126275	0.873	0.892	0.000897165
ATP11C	2.54247e-08	0.146269	0.256	0.208	0.000930571
TAGLN	2.73878e-08	-0.404782	0.183	0.226	0.00100242
RAC1	2.79131e-08	-0.126758	0.828	0.846	0.00102165
PDE4D	2.94815e-08	0.10261	0.101	0.068	0.00107905
ANKS1A	2.94832e-08	0.111803	0.169	0.127	0.00107911
ANAPC11	3.00724e-08	-0.139856	0.325	0.377	0.00110068
ARHGAP26	3.22193e-08	0.122139	0.178	0.135	0.00117926
GMFG	3.33678e-08	-0.169762	0.365	0.415	0.00122129
YAP1	3.35947e-08	0.112709	0.134	0.097	0.0012296
ADAM10	3.36929e-08	0.134828	0.278	0.227	0.00123319
MRPL36	3.45079e-08	-0.116061	0.162	0.207	0.00126302
ANP32B	3.49455e-08	0.12711	0.648	0.597	0.00127904
GBP1	3.67097e-08	-0.186846	0.135	0.177	0.00134361
CLIC1	3.97741e-08	-0.133812	0.749	0.785	0.00145577
NPC2	4.15395e-08	0.15338	0.716	0.67	0.00152039
IVNS1ABP	4.27402e-08	-0.201825	0.08	0.113	0.00156434
ESYT2	4.37386e-08	0.131948	0.236	0.19	0.00160088
PIR	4.48562e-08	0.130763	0.184	0.141	0.00164178
DPYSL2	4.52352e-08	0.153575	0.761	0.741	0.00165565
PDLIM4	4.5374e-08	0.137868	0.308	0.258	0.00166073
BAG3	4.64216e-08	-0.119875	0.155	0.199	0.00169908
PCBD1	4.68426e-08	0.109981	0.205	0.161	0.00171449
TNRC6B	5.13191e-08	0.132111	0.448	0.399	0.00187833
TNFSF10	5.15311e-08	-0.190707	0.774	0.802	0.00188609
NDUFA12	5.21217e-08	-0.134123	0.381	0.437	0.00190771
SAP18	5.25941e-08	-0.137436	0.535	0.576	0.001925
EHD4	5.3143e-08	-0.11689	0.316	0.37	0.00194509
FZD4	5.33168e-08	0.13595	0.161	0.122	0.00195145
BLCAP	5.45767e-08	0.113563	0.146	0.107	0.00199756
PACSIN2	5.65416e-08	0.11187	0.174	0.132	0.00206948
ARL6IP5	6.37683e-08	0.160114	0.511	0.463	0.00233398
PALM2-AKAP2	6.55607e-08	0.161478	0.64	0.603	0.00239959
TUBA1A	6.69077e-08	-0.149171	0.455	0.507	0.00244889
LTBP3	6.9948e-08	0.11749	0.177	0.135	0.00256017
BTBD7	7.35084e-08	0.116112	0.216	0.171	0.00269048
ITGA3	7.42649e-08	0.110233	0.171	0.131	0.00271817
NRP1	7.71702e-08	-0.159865	0.457	0.504	0.00282451
CLEC14A	7.79895e-08	-0.155831	0.817	0.824	0.00285449
CFLAR	8.19573e-08	0.151979	0.511	0.466	0.00299972
MDFIC	9.32346e-08	0.141186	0.23	0.186	0.00341248
COX4I1	9.50072e-08	-0.145624	0.847	0.873	0.00347736
CAMSAP2	9.62071e-08	0.156668	0.214	0.172	0.00352128
UBL3	9.96178e-08	0.114495	0.221	0.176	0.00364611
RNF145	1.02684e-07	-0.12875	0.225	0.274	0.00375834
CFAP36	1.1089e-07	-0.152381	0.244	0.294	0.00405867
CNST	1.11831e-07	0.108435	0.141	0.104	0.00409311
SMAD1	1.12141e-07	-0.182404	0.45	0.496	0.00410446
TPM4	1.13287e-07	0.152606	0.738	0.707	0.00414642
CHCHD2	1.17734e-07	-0.115971	0.741	0.774	0.00430917
HLA-E	1.2575e-07	-0.101527	0.99	0.992	0.00460257
MRPL17	1.36147e-07	-0.108542	0.155	0.199	0.00498311
RPS13	1.36941e-07	-0.108718	0.996	0.995	0.00501219
CEP85L	1.48159e-07	0.118453	0.168	0.129	0.00542277
SYNGR2	1.66965e-07	0.142704	0.507	0.457	0.00611107
FNBP1	1.69177e-07	0.101609	0.18	0.14	0.00619205
NME1	1.77624e-07	-0.103812	0.127	0.168	0.00650121
TCF4	1.83136e-07	-0.136012	0.789	0.816	0.00670296
STK17A	1.8441e-07	-0.112509	0.132	0.171	0.00674958
RPL17	2.00169e-07	-0.11852	0.993	0.994	0.0073264
HACD3	2.06457e-07	-0.136943	0.201	0.246	0.00755654
NTS	2.11763e-07	0.184127	0.056	0.033	0.00775072
FAU	2.13731e-07	-0.104436	0.995	0.995	0.00782275
IGFBP7	2.16343e-07	-0.220608	0.977	0.965	0.00791835
LAMB2	2.18126e-07	0.139461	0.322	0.272	0.00798362
ATP6V0B	2.21507e-07	-0.129485	0.316	0.368	0.00810737
PDCD6	2.21903e-07	-0.128391	0.335	0.385	0.00812188
TMEM204	2.24907e-07	-0.138653	0.263	0.311	0.00823183
TLK1	2.31347e-07	0.10539	0.203	0.161	0.00846753
ANKRD12	2.38966e-07	0.143687	0.589	0.54	0.0087464
RPSA	2.43135e-07	-0.11182	0.936	0.947	0.00889897
SET	2.46498e-07	-0.138889	0.73	0.761	0.00902208
PREX2	2.49039e-07	0.120248	0.365	0.315	0.00911508
ZC3H13	2.54195e-07	0.145687	0.414	0.369	0.0093038
GADD45A	2.7605e-07	-0.143741	0.292	0.342	0.0101037
GABARAPL2	2.81831e-07	-0.15021	0.469	0.516	0.0103153
SH3BP2	2.91705e-07	0.112873	0.131	0.097	0.0106767
ADD1	2.99214e-07	0.144228	0.337	0.29	0.0109515
CANX	3.03687e-07	0.118771	0.586	0.544	0.0111153
CDKN1A	3.06244e-07	-0.30732	0.305	0.349	0.0112089
LSM7	3.38179e-07	-0.138131	0.361	0.412	0.0123777
CMTM8	3.42411e-07	-0.106652	0.205	0.253	0.0125326
TAP1	3.60233e-07	-0.11212	0.185	0.228	0.0131849
LAYN	3.65993e-07	-0.113376	0.107	0.143	0.0133957
CNN3	3.72704e-07	0.129497	0.476	0.429	0.0136413
OAZ2	3.75885e-07	-0.100392	0.208	0.254	0.0137578
CDC25B	3.97136e-07	0.10976	0.163	0.125	0.0145356
TGFBR2	4.00424e-07	0.105133	0.827	0.803	0.0146559
NRARP	4.03301e-07	-0.112706	0.23	0.278	0.0147612
PSMD8	4.05634e-07	-0.134348	0.33	0.377	0.0148466
VAMP5	4.11722e-07	-0.136629	0.659	0.694	0.0150694
YWHAZ	4.26353e-07	0.164334	0.551	0.509	0.015605
FNIP2	4.34952e-07	0.120513	0.216	0.175	0.0159197
RBPMS	4.4022e-07	-0.115037	0.216	0.26	0.0161125
ACE	4.87196e-07	-0.216122	0.245	0.287	0.0178319
AC004540.2	4.8993e-07	-0.121366	0.108	0.143	0.0179319
PLAT	4.94234e-07	0.145625	0.27	0.226	0.0180895
RPL12	5.00911e-07	-0.13934	0.998	0.999	0.0183338
GNG10	5.27353e-07	-0.111802	0.253	0.3	0.0193016
RNASE1	5.75343e-07	0.124137	0.896	0.883	0.0210581
YBX3	5.76326e-07	0.128158	0.84	0.816	0.0210941
MTURN	5.78528e-07	0.104534	0.205	0.165	0.0211747
FLOT1	5.92831e-07	-0.121377	0.469	0.516	0.0216982
PHPT1	5.94836e-07	-0.157453	0.325	0.369	0.0217716
NUDCD2	6.35852e-07	-0.103083	0.146	0.185	0.0232728
MIF	6.47078e-07	-0.122058	0.83	0.85	0.0236837
PLAC9	6.48521e-07	0.141884	0.296	0.25	0.0237365
MKNK2	6.60429e-07	0.115698	0.192	0.152	0.0241724
DNTTIP2	6.60777e-07	-0.112616	0.212	0.255	0.0241851
PCYOX1	6.91694e-07	0.118193	0.201	0.16	0.0253167
SNRPG	7.17444e-07	-0.122934	0.431	0.481	0.0262592
ATP5MF	7.24884e-07	-0.108082	0.34	0.392	0.0265315
RPS9	7.29256e-07	-0.127772	0.995	0.994	0.0266915
SEPTIN11	7.68091e-07	0.100554	0.177	0.139	0.0281129
EPS8	7.8149e-07	-0.118111	0.365	0.415	0.0286033
ICAM1	7.97272e-07	0.106038	0.345	0.295	0.0291809
MCFD2	7.97571e-07	0.116113	0.283	0.239	0.0291919
AVPR2	8.1436e-07	-0.104797	0.234	0.28	0.0298064
HEBP2	8.17777e-07	0.153092	0.438	0.394	0.0299315
PABPC4	8.35576e-07	0.122458	0.262	0.219	0.0305829
C19orf53	8.44129e-07	-0.120904	0.502	0.549	0.030896
TNFSF12	9.56019e-07	-0.110708	0.121	0.156	0.0349912
ARHGAP21	9.67495e-07	0.131157	0.182	0.145	0.0354113
BCR	9.70715e-07	0.10256	0.212	0.17	0.0355291
IFI44	9.7074e-07	-0.117694	0.163	0.204	0.0355301
PSMA7	9.71071e-07	-0.122102	0.727	0.757	0.0355422
SIN3B	9.76271e-07	0.103213	0.117	0.086	0.0357325
MRPS24	1.01464e-06	-0.107483	0.325	0.375	0.037137
DDX21	1.04669e-06	-0.14163	0.406	0.453	0.0383099
PSMB5	1.04763e-06	-0.108557	0.292	0.34	0.0383445
ELOC	1.07218e-06	-0.122941	0.309	0.358	0.039243
RNF115	1.15995e-06	0.102875	0.27	0.227	0.0424552
FYN	1.16852e-06	-0.105843	0.208	0.253	0.0427692
CREBRF	1.3096e-06	0.126191	0.31	0.265	0.0479328
CDC42BPB	1.31519e-06	0.116227	0.251	0.209	0.0481373
AURKAIP1	1.33401e-06	-0.135716	0.328	0.377	0.0488261
RALA	1.3823e-06	-0.135696	0.187	0.228	0.0505937
OSBPL1A	1.46289e-06	0.147363	0.451	0.403	0.0535431
SP110	1.63178e-06	-0.107268	0.211	0.254	0.059725
SMURF2	1.7285e-06	0.109522	0.132	0.099	0.0632647
UQCRB	1.74035e-06	0.106337	0.881	0.862	0.0636985
MAF	1.74091e-06	0.112881	0.116	0.086	0.063719
MYH9	1.88851e-06	0.145795	0.711	0.673	0.0691214
UBB	1.92744e-06	-0.123864	0.771	0.795	0.0705463
PPP3CA	2.00958e-06	0.144138	0.5	0.463	0.0735526
PNPLA2	2.06676e-06	0.131391	0.291	0.25	0.0756456
ELOB	2.07369e-06	-0.122963	0.728	0.746	0.0758991
ATP5MG	2.09812e-06	-0.109573	0.646	0.68	0.0767934
MRTFB	2.13127e-06	-0.108868	0.456	0.51	0.0780065
RNF7	2.1656e-06	-0.103413	0.339	0.385	0.0792633
A4GALT	2.17745e-06	-0.118985	0.24	0.284	0.0796969
APRT	2.18832e-06	-0.12874	0.441	0.484	0.0800947
PSMA2	2.42783e-06	-0.135904	0.402	0.447	0.0888611
PRKAR1A	2.83085e-06	0.112654	0.341	0.296	0.103612
KLF7	2.84674e-06	0.117393	0.223	0.184	0.104194
TSHZ2	2.93113e-06	0.107004	0.573	0.521	0.107282
EIF4A1	2.93175e-06	-0.119139	0.76	0.783	0.107305
PODXL	2.9332e-06	-0.239012	0.376	0.41	0.107358
PYURF	2.95157e-06	-0.117661	0.352	0.403	0.10803
BCAM	2.97406e-06	-0.107036	0.703	0.733	0.108854
CLIP1	3.04802e-06	0.129174	0.261	0.221	0.11156
SELENOM	3.16694e-06	-0.164442	0.543	0.579	0.115913
TTC3	3.4885e-06	0.104329	0.271	0.228	0.127683
CCT2	3.59969e-06	-0.104969	0.216	0.257	0.131752
KLF10	3.66784e-06	0.151291	0.449	0.405	0.134247
TLE4	3.73494e-06	0.12382	0.198	0.16	0.136703
GOLGA4	4.06396e-06	0.105529	0.378	0.333	0.148745
SLC44A2	4.32053e-06	0.112125	0.314	0.273	0.158136
MARCH6	4.3214e-06	0.102306	0.206	0.168	0.158168
EEA1	4.62174e-06	0.145908	0.265	0.226	0.16916
EID1	4.64035e-06	0.110916	0.749	0.715	0.169842
RPS19	4.69003e-06	-0.122217	0.999	0.999	0.17166
SYNE2	4.8298e-06	0.135728	0.756	0.734	0.176776
RTN3	4.91341e-06	0.120757	0.32	0.279	0.179836
WNK1	5.07318e-06	0.147884	0.514	0.47	0.185683
XPO1	5.10671e-06	0.105356	0.206	0.168	0.186911
GPX4	5.34202e-06	0.106859	0.665	0.632	0.195523
HTRA1	5.36014e-06	-0.109563	0.274	0.318	0.196186
CARHSP1	5.77546e-06	0.103768	0.321	0.275	0.211388
DEPP1	5.99493e-06	-0.279796	0.403	0.437	0.219421
ATXN3	6.1171e-06	0.107667	0.214	0.176	0.223892
PEPD	6.21915e-06	-0.101431	0.171	0.209	0.227627
ENSA	6.28958e-06	0.120126	0.43	0.389	0.230205
HLA-DQA2	6.48612e-06	-0.127303	0.169	0.204	0.237398
PFDN1	7.20518e-06	-0.101189	0.344	0.391	0.263717
FAM241A	7.39218e-06	-0.117783	0.302	0.342	0.270561
SPHK1	7.7142e-06	0.100841	0.466	0.413	0.282347
AFDN	7.71683e-06	-0.135602	0.277	0.316	0.282444
CCL2	7.8838e-06	0.198013	0.252	0.214	0.288555
SNHG14	7.98369e-06	0.118341	0.13	0.101	0.292211
CCDC88A	8.13372e-06	0.115697	0.19	0.155	0.297702
PPDPF	8.85276e-06	0.106534	0.402	0.357	0.32402
YWHAH	8.91259e-06	-0.136043	0.401	0.442	0.32621
ASPH	9.09583e-06	0.125158	0.339	0.296	0.332917
CARD10	9.12163e-06	0.119603	0.188	0.154	0.333861
FSTL1	9.20316e-06	0.118685	0.338	0.297	0.336845
RO60	9.35022e-06	0.109064	0.313	0.27	0.342227
RAMP2	9.40386e-06	-0.131036	0.881	0.886	0.344191
PRDX5	9.46433e-06	-0.103391	0.446	0.492	0.346404
FXYD5	9.72653e-06	-0.122783	0.772	0.8	0.356001
APOD	1.01663e-05	-0.151906	0.153	0.187	0.372099
EIF3D	1.03548e-05	-0.115039	0.434	0.473	0.378995
NUMA1	1.07298e-05	0.11751	0.285	0.246	0.392722
PPIB	1.11352e-05	-0.11735	0.618	0.657	0.407559
NTHL1	1.19383e-05	-0.110257	0.198	0.235	0.436954
PTPN12	1.24373e-05	-0.100508	0.398	0.439	0.455217
TESC	1.26814e-05	-0.110479	0.179	0.215	0.46415
SERPINB1	1.2906e-05	0.13816	0.433	0.395	0.472373
MRPL43	1.29432e-05	-0.115146	0.218	0.256	0.473734
KMT2A	1.36503e-05	0.136564	0.405	0.364	0.499616
TLN1	1.38275e-05	0.109236	0.459	0.418	0.506099
EGLN1	1.38928e-05	-0.108646	0.26	0.301	0.508491
PSMB2	1.40119e-05	-0.106415	0.246	0.285	0.512849
PAM	1.42099e-05	0.107692	0.17	0.137	0.520096
SNHG6	1.46771e-05	0.104319	0.778	0.75	0.537198
PTTG1IP	1.46789e-05	0.123273	0.602	0.568	0.537264
PSME1	1.50134e-05	-0.122882	0.707	0.736	0.549505
APCDD1	1.56785e-05	-0.119335	0.117	0.149	0.57385
FGL2	1.63912e-05	0.155805	0.293	0.255	0.599933
NOP10	1.64361e-05	-0.120112	0.465	0.506	0.601579
PTPRK	1.67399e-05	-0.106094	0.172	0.208	0.612695
STK25	1.71161e-05	0.104972	0.171	0.139	0.626468
COX5A	1.76121e-05	-0.107937	0.412	0.457	0.644622
TIE1	1.80527e-05	0.125294	0.349	0.311	0.660747
SLC29A1	1.84457e-05	0.10407	0.189	0.156	0.675131
CEP350	1.84498e-05	0.118264	0.218	0.183	0.675281
THBD	1.95966e-05	0.113057	0.443	0.399	0.717255
FABP4	1.98288e-05	-0.343342	0.035	0.053	0.725755
DAB2	1.98318e-05	-0.128551	0.308	0.348	0.725862
NUCB2	2.00039e-05	-0.128942	0.33	0.368	0.732163
IFNGR1	2.04779e-05	-0.106421	0.237	0.275	0.74951
CNTNAP3B	2.12489e-05	0.106765	0.244	0.208	0.777729
BSG	2.13419e-05	-0.136466	0.518	0.553	0.781134
TSNAX	2.17478e-05	-0.106882	0.261	0.302	0.795992
DICER1	2.2038e-05	0.107485	0.206	0.173	0.806611
STOM	2.40935e-05	0.100966	0.606	0.567	0.881846
POLR2J3	2.45238e-05	0.11814	0.134	0.105	0.897597
SERTAD4-AS1	2.47744e-05	-0.12465	0.278	0.317	0.906767
XIAP	2.49884e-05	0.1194	0.19	0.157	0.9146
GRN	2.71484e-05	0.1439	0.561	0.523	0.993657
MAP3K3	2.96867e-05	0.120926	0.248	0.213	1
TNRC6A	3.18938e-05	0.113969	0.286	0.25	1
ALKBH7	3.41472e-05	-0.109348	0.383	0.423	1
CTTNBP2NL	3.49597e-05	-0.123914	0.238	0.272	1
CALCOCO2	3.75578e-05	0.117158	0.426	0.389	1
TOMM7	3.87889e-05	0.102056	0.877	0.867	1
KAT6B	3.89449e-05	0.100158	0.158	0.127	1
VAMP3	4.12741e-05	0.110296	0.431	0.394	1
SPEN	4.19383e-05	0.10524	0.238	0.203	1
KLF2	4.53377e-05	-0.189472	0.931	0.917	1
CDC42EP3	4.61301e-05	-0.123803	0.404	0.439	1
NCK1	4.65619e-05	-0.118037	0.25	0.287	1
VMP1	4.6711e-05	-0.109297	0.231	0.268	1
PUM1	4.75341e-05	0.115989	0.283	0.246	1
ADCY4	5.1204e-05	0.121241	0.46	0.42	1
ZFAS1	5.21006e-05	0.113274	0.757	0.739	1
IRF2BP2	5.53338e-05	0.109034	0.407	0.371	1
BLOC1S1	5.66426e-05	-0.11385	0.286	0.322	1
ATL3	5.77505e-05	0.114637	0.268	0.234	1
ATP5IF1	6.07516e-05	-0.101009	0.521	0.558	1
STAB1	6.19707e-05	0.10123	0.154	0.125	1
UBE2J1	6.6041e-05	-0.109188	0.17	0.201	1
LINC-PINT	6.70721e-05	0.107062	0.166	0.136	1
CD46	6.92615e-05	-0.113402	0.32	0.358	1
RAB11A	7.35858e-05	0.105997	0.657	0.624	1
ADAMTS1	8.30854e-05	-0.213855	0.283	0.32	1
UBALD2	8.38085e-05	-0.100951	0.221	0.256	1
BCAR1	8.71728e-05	0.116742	0.167	0.138	1
PIK3C2B	8.77413e-05	-0.11109	0.103	0.129	1
RPL10	9.09732e-05	-0.10299	1	1	1
GOLGB1	9.15548e-05	0.12401	0.411	0.376	1
CAPN2	9.22867e-05	0.115302	0.323	0.289	1
ASH1L	9.36408e-05	0.10783	0.324	0.288	1
G0S2	9.61236e-05	-0.331086	0.016	0.028	1
RPL36A	9.75567e-05	-0.103299	0.995	0.993	1
MECOM	9.80271e-05	-0.14271	0.43	0.462	1
SNU13	9.91595e-05	-0.105632	0.531	0.567	1
PARP14	9.96092e-05	-0.147611	0.267	0.301	1
HINT1	0.000111777	-0.101872	0.784	0.809	1
ZFP36L2	0.000112764	0.117163	0.834	0.812	1
EGR1	0.000113561	-0.253353	0.413	0.444	1
GJA4	0.000113908	-0.133866	0.09	0.115	1
CDH5	0.000121843	-0.105232	0.418	0.454	1
PCBP2	0.000123223	0.10361	0.672	0.646	1
STC1	0.000128693	-0.171398	0.106	0.131	1
TFF3	0.000134314	0.167078	0.52	0.492	1
CALU	0.000135088	-0.103901	0.261	0.296	1
AMD1	0.000137773	-0.128327	0.26	0.294	1
RPGR	0.000141491	0.110412	0.259	0.225	1
XIST	0.000149319	0.128819	0.034	0.02	1
PLP2	0.00015251	-0.119101	0.317	0.35	1
MRPS21	0.000152778	-0.116041	0.355	0.392	1
UBN1	0.000161545	0.109556	0.288	0.255	1
COX5B	0.000164701	-0.112246	0.675	0.698	1
RPS5	0.000165796	-0.113149	0.981	0.98	1
TCF25	0.000167435	-0.115273	0.407	0.443	1
CCL21	0.000170438	0.150182	0.947	0.944	1
GIMAP4	0.000172496	0.103686	0.744	0.732	1
CLIC4	0.000180632	-0.111127	0.279	0.313	1
ATRX	0.000181839	0.104288	0.556	0.528	1
PCAT19	0.000184136	0.103174	0.763	0.731	1
ATP1B3	0.000190959	-0.135957	0.359	0.392	1
UHRF2	0.000195076	0.113583	0.175	0.146	1
ITGA1	0.000245797	-0.108809	0.14	0.167	1
VPS35	0.000247055	0.114255	0.26	0.229	1
JAM2	0.000250179	-0.109952	0.598	0.628	1
N4BP2L2	0.000250679	0.132986	0.556	0.521	1
TRAM1	0.00026238	0.107014	0.439	0.41	1
EIF5A	0.000262482	-0.104292	0.409	0.444	1
MYDGF	0.00026644	-0.102928	0.298	0.332	1
DEK	0.000284767	0.131755	0.691	0.67	1
PTBP3	0.000285373	0.110089	0.319	0.286	1
TM9SF3	0.000285676	0.107268	0.407	0.375	1
WSB1	0.000330629	0.124105	0.408	0.379	1
BTF3	0.000338089	-0.100125	0.91	0.925	1
TCEAL9	0.000343916	0.110998	0.331	0.298	1
AKAP9	0.000352264	0.128677	0.487	0.457	1
PJA2	0.000364333	0.103629	0.317	0.286	1
XRN2	0.000380067	-0.10662	0.403	0.438	1
ATF4	0.000398778	-0.108037	0.508	0.535	1
PDIA3	0.000423858	-0.103687	0.558	0.587	1
MED13L	0.000480322	0.110153	0.276	0.245	1
RPS2	0.000577666	-0.131502	0.998	1	1
FAM89B	0.000633607	0.102954	0.263	0.236	1
SRRM1	0.00067015	-0.118344	0.596	0.617	1
PDLIM5	0.000742413	0.102539	0.376	0.351	1
DPYSL3	0.000750266	0.102406	0.261	0.232	1
ANKRD11	0.000806456	0.128736	0.395	0.365	1
JUN	0.000866946	-0.194875	0.923	0.924	1
RAP1B	0.000970449	0.103025	0.475	0.448	1
ZFAND5	0.000999829	-0.102004	0.3	0.331	1
HSPA5	0.00140579	-0.1006	0.386	0.418	1
INSR	0.00143251	-0.144494	0.135	0.157	1
KPNB1	0.00163067	0.103949	0.287	0.259	1
LMCD1	0.00189553	-0.102602	0.635	0.656	1
RWDD1	0.00195329	-0.114326	0.443	0.476	1
NEDD8	0.00198867	-0.105748	0.587	0.608	1
ENO1	0.00212169	-0.100804	0.577	0.602	1
NEDD9	0.00259156	-0.102758	0.268	0.294	1
GDI2	0.00270022	0.127685	0.402	0.381	1
AC103591.3	0.00286226	-0.141877	0.128	0.149	1
MPHOSPH8	0.00353352	0.114224	0.434	0.41	1
CXCL11	0.00378856	-0.153547	0.012	0.019	1
RSF1	0.00474806	0.104471	0.363	0.341	1
HERPUD1	0.00562557	-0.111707	0.306	0.328	1
SPPL2A	0.00638123	0.241014	0.214	0.191	1
PGF	0.00639602	-0.101013	0.097	0.114	1
RB1CC1	0.00804573	0.100624	0.273	0.251	1
FABP5	0.0100896	-0.263364	0.506	0.522	1
NEAT1	0.0108859	0.157323	0.906	0.918	1
RHOB	0.0158453	-0.307524	0.41	0.421	1
RGS16	0.0159616	-0.135638	0.276	0.299	1
HSP90AA1	0.0163704	-0.134339	0.844	0.844	1
ATF3	0.0167007	-0.169782	0.315	0.335	1
PPFIBP1	0.0277727	0.113887	0.364	0.352	1
AQP1	0.0424502	-0.12333	0.945	0.927	1
CST3	0.0669709	-0.103115	0.989	0.981	1
HLA-DRB5	0.0760409	-0.155019	0.579	0.574	1
SOD2	0.0820752	-0.129677	0.394	0.403	1
CYB5D2	0.233868	-0.106656	0.13	0.138	1
BTG2	0.357855	-0.118168	0.475	0.476	1
HSPA1A	0.377235	-0.149145	0.612	0.601	1
CXCL10	0.427598	-0.173917	0.011	0.013	1
HSPA1B	0.509251	-0.127285	0.364	0.367	1
ID3	0.551307	-0.114203	0.851	0.836	1
IFIT2	0.658996	-0.148442	0.124	0.126	1
MT1M	0.685792	-0.170131	0.07	0.072	1
CRIP1	0.727864	-0.128535	0.733	0.716	1
PLPP1	0.783978	-0.19773	0.223	0.22	1
EDNRB	0.978373	-0.144077	0.138	0.135	1
