# Supplementary figures and images for: Claudin5 protects the peripheral endothelial barrier in an organ and vessel-type-specific manner
Source: eLife journal article supplement (doi:10.7554/elife.78517), 2022-07-21

Figure 1-figure supplement 1.

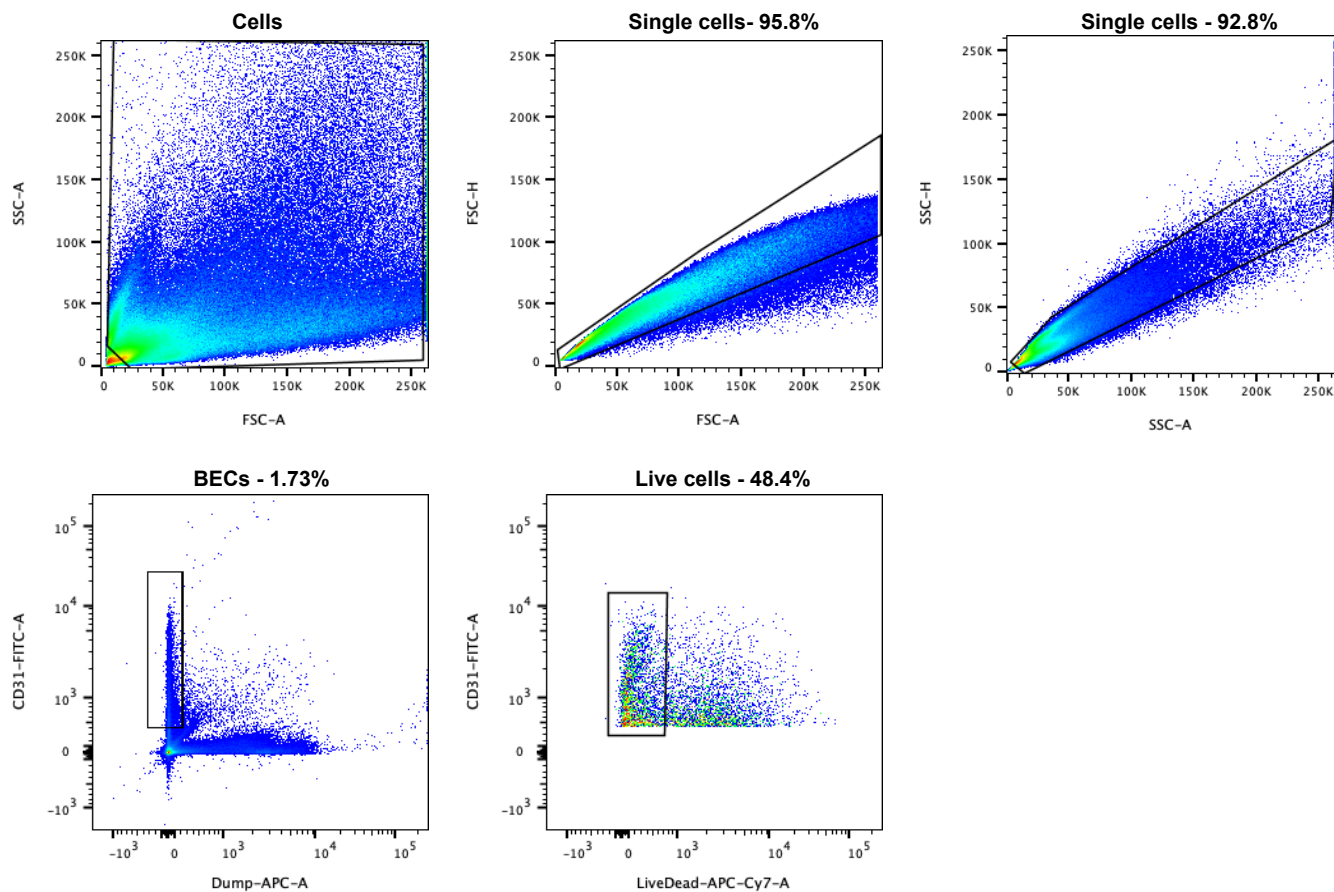

Supplement: supp [file elife-78517-supp-v1.zip › elife_poa_e78517_Figure_1_figure_supplement_1.pdf]

Figure 1-figure supplement 2.

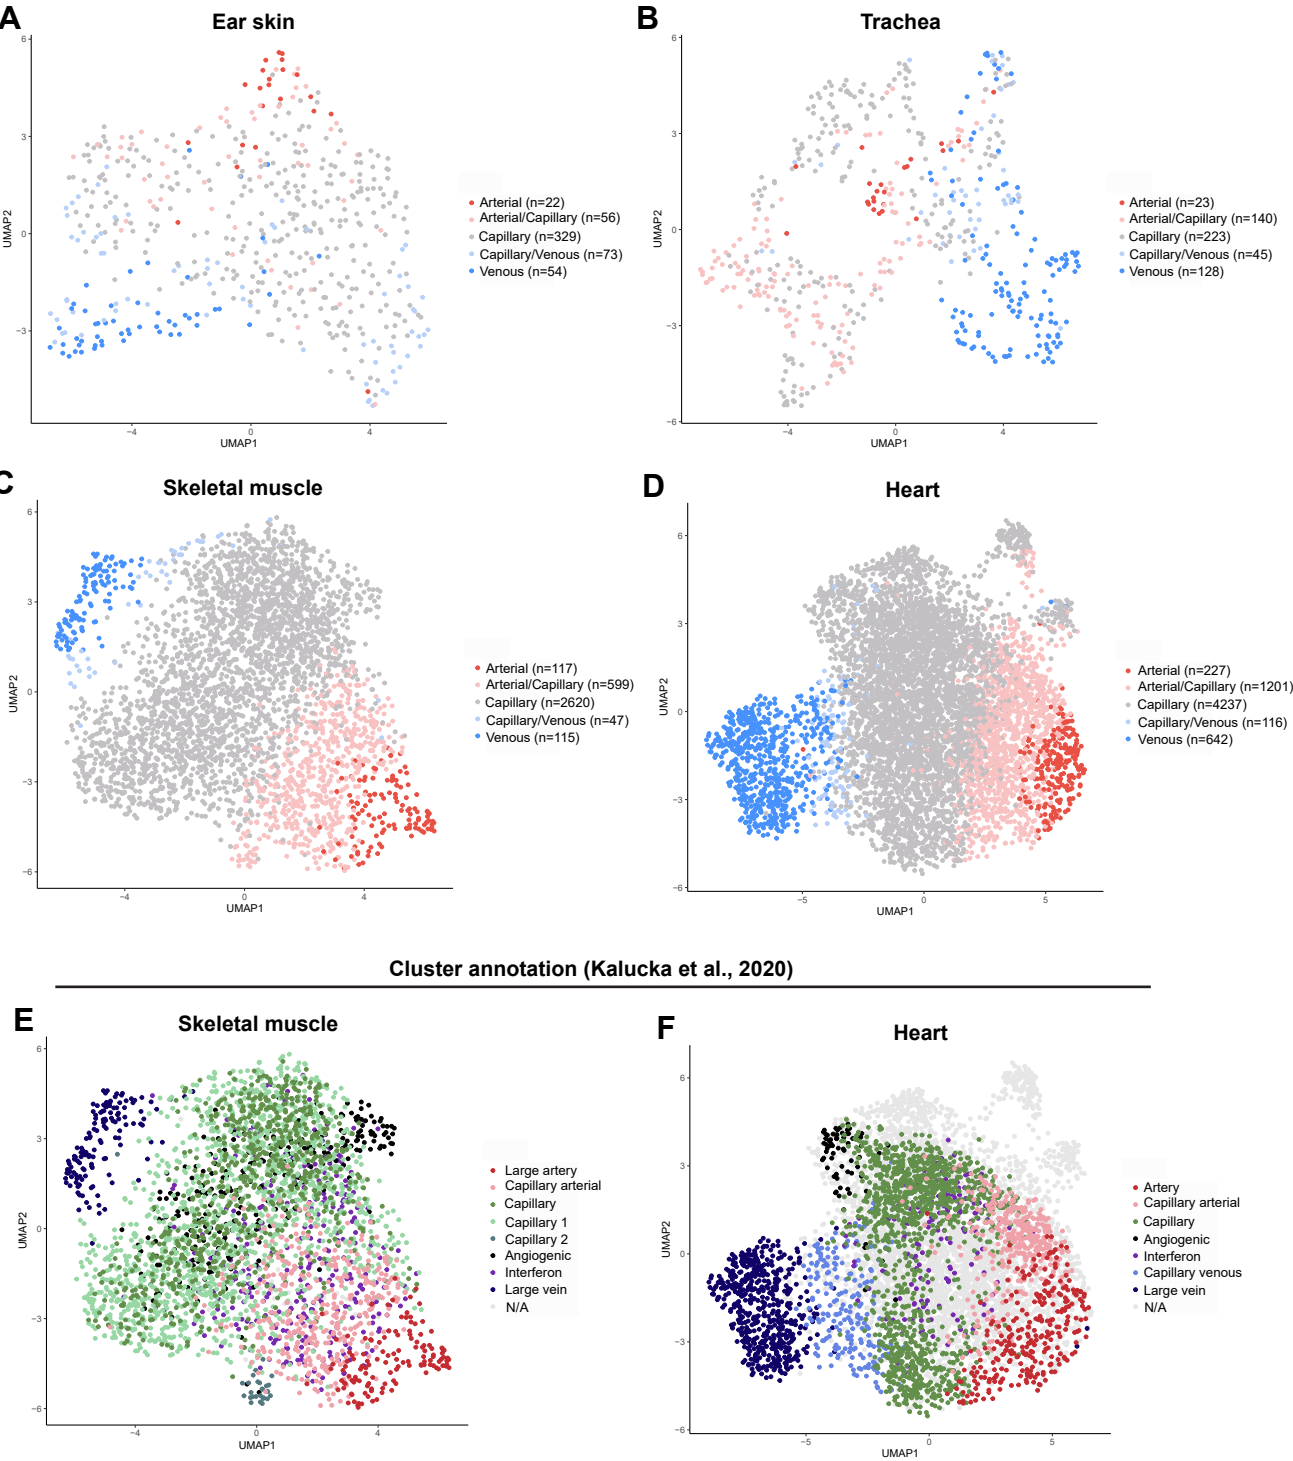

Supplement: supp [file elife-78517-supp-v1.zip › elife_poa_e78517_Figure_1_figure_supplement_2.pdf]

Figure 1-figure supplement 4.

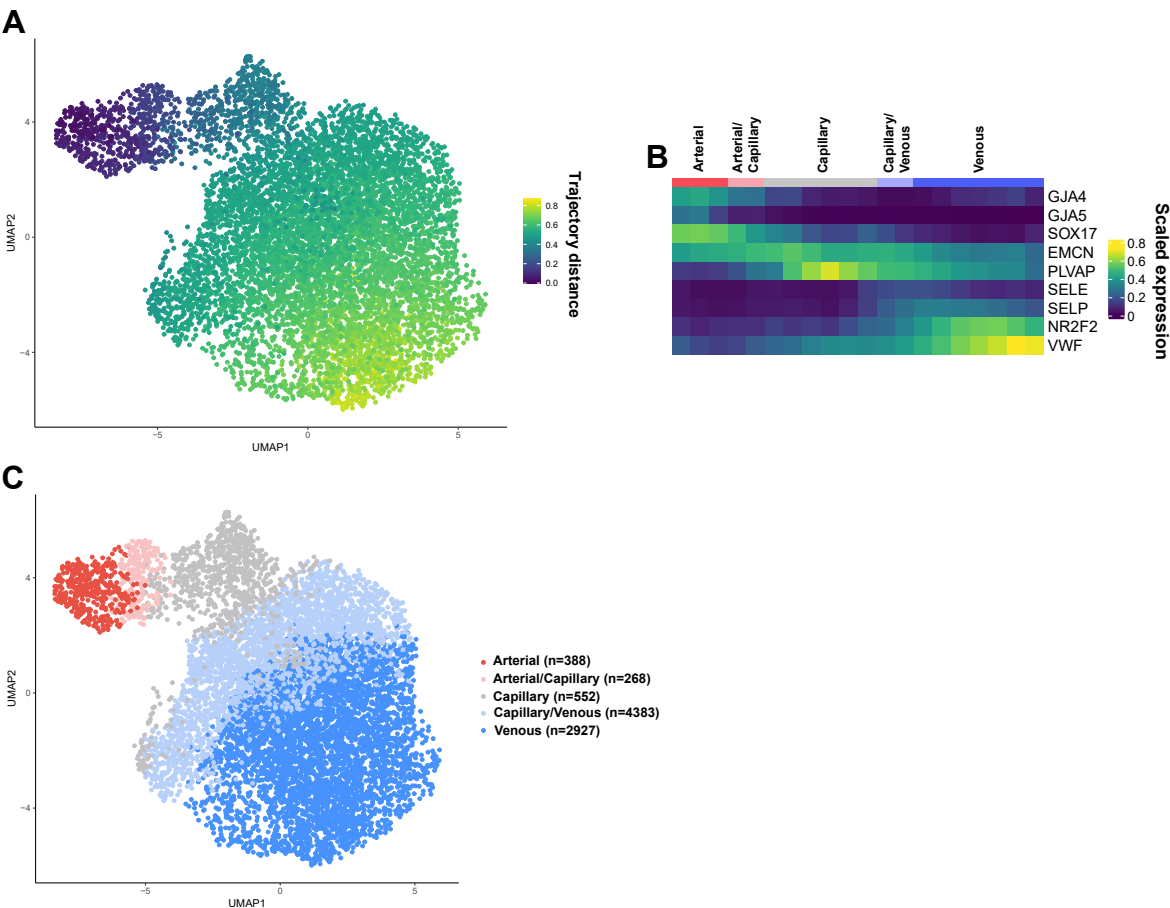

Supplement: supp [file elife-78517-supp-v1.zip › elife_poa_e78517_Figure_1_figure_supplement_4.pdf]

Figure 2 - figure supplement 1

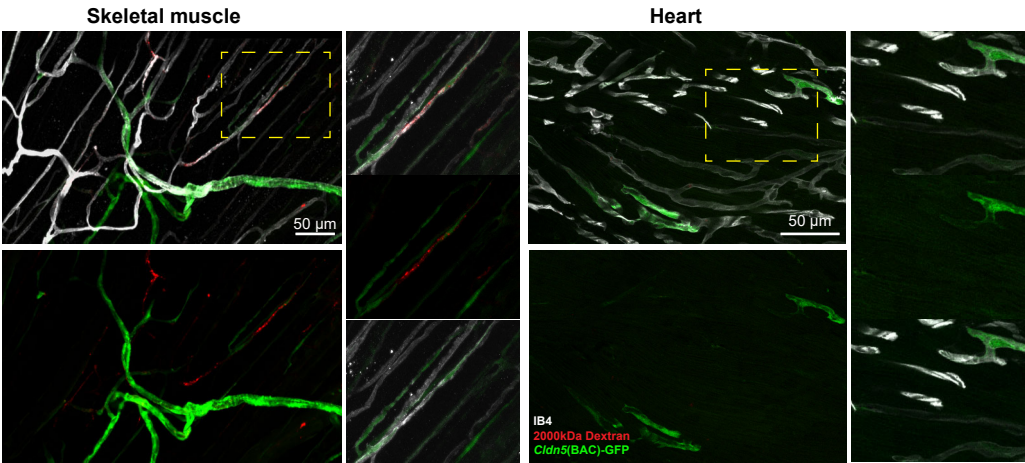

Supplement: supp [file elife-78517-supp-v1.zip › elife_poa_e78517_Figure_2_figure_supplement_1.pdf]

Figure 3 - figure supplement 1

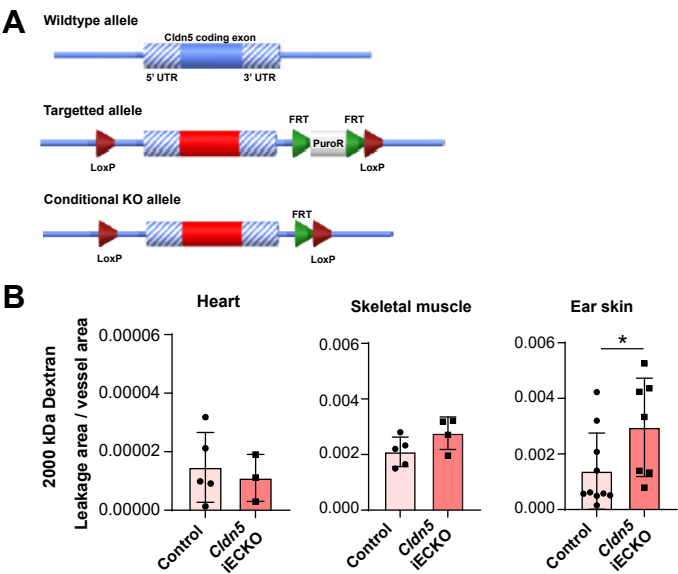

Supplement: supp [file elife-78517-supp-v1.zip › elife_poa_e78517_Figure_3_figure_supplement_1.pdf]

Figure 4 - figure supplement 1

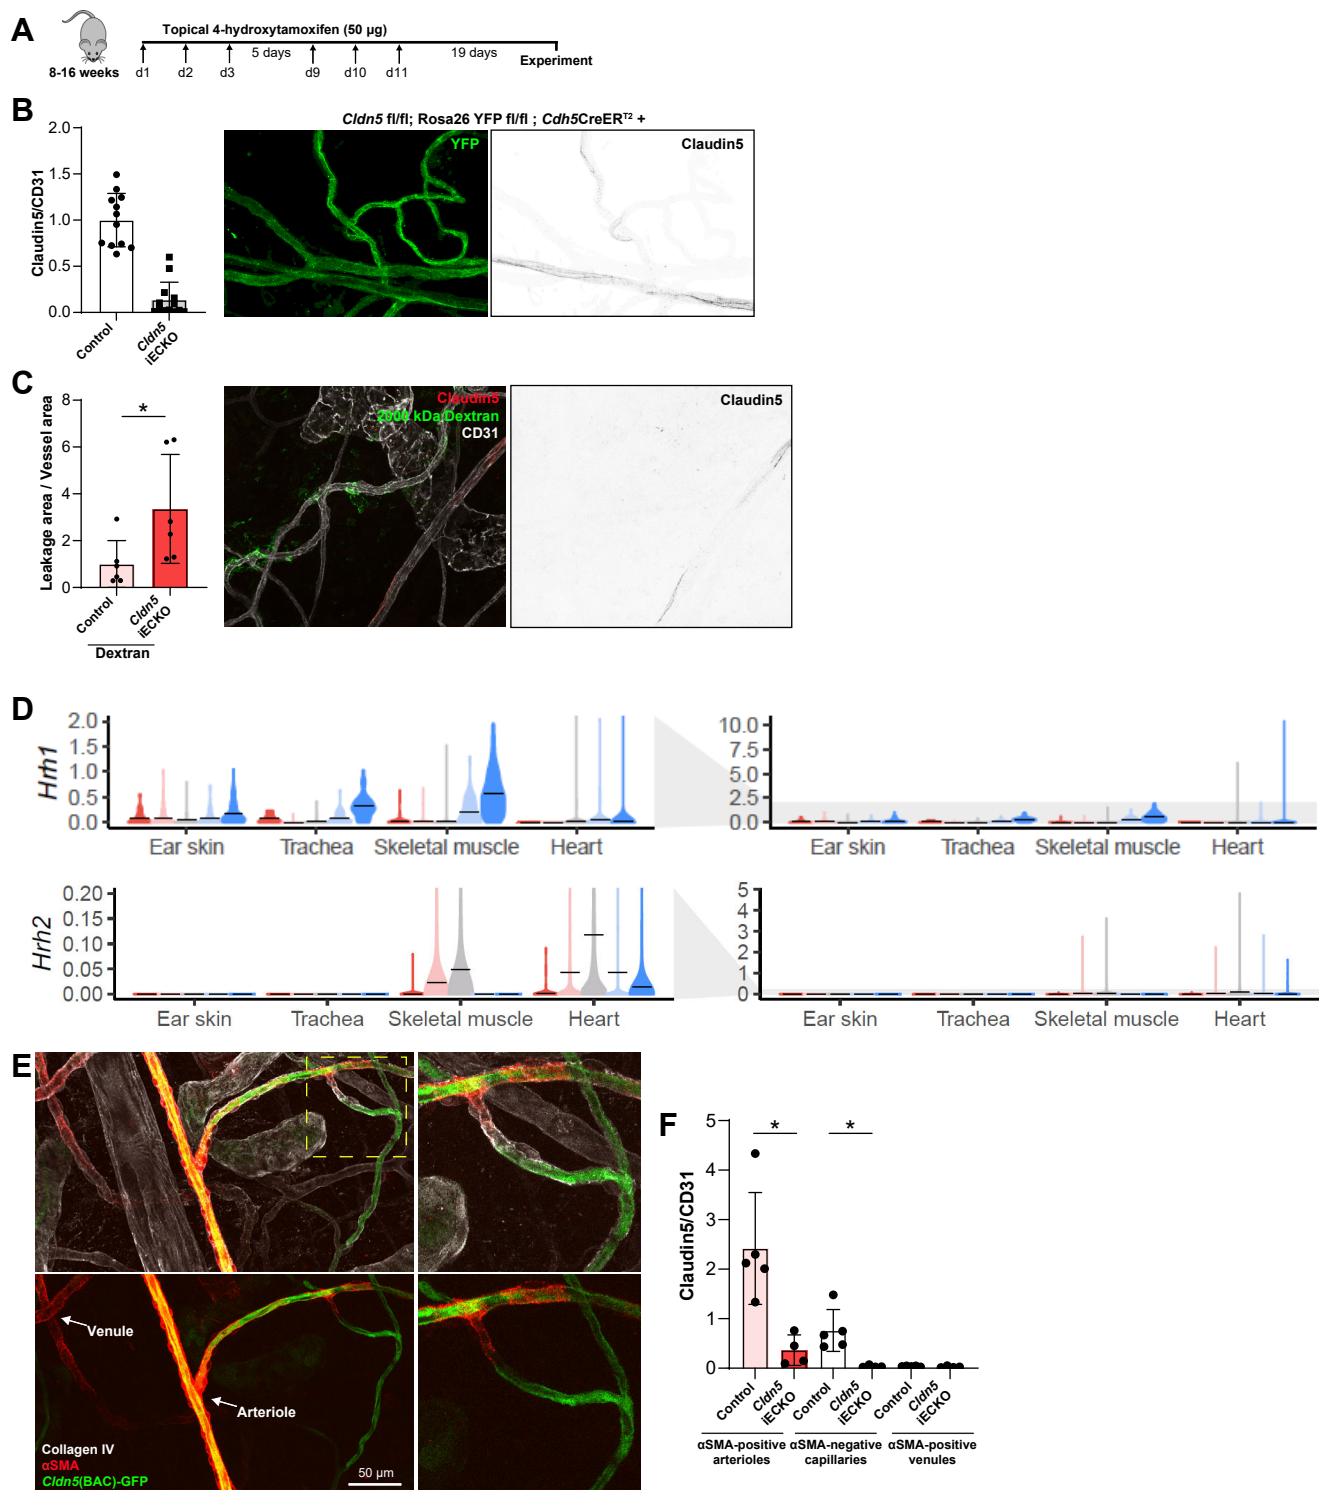

Supplement: supp [file elife-78517-supp-v1.zip › elife_poa_e78517_Figure_4_figure_supplement_1.pdf]

Figure 5-figure supplement 1.

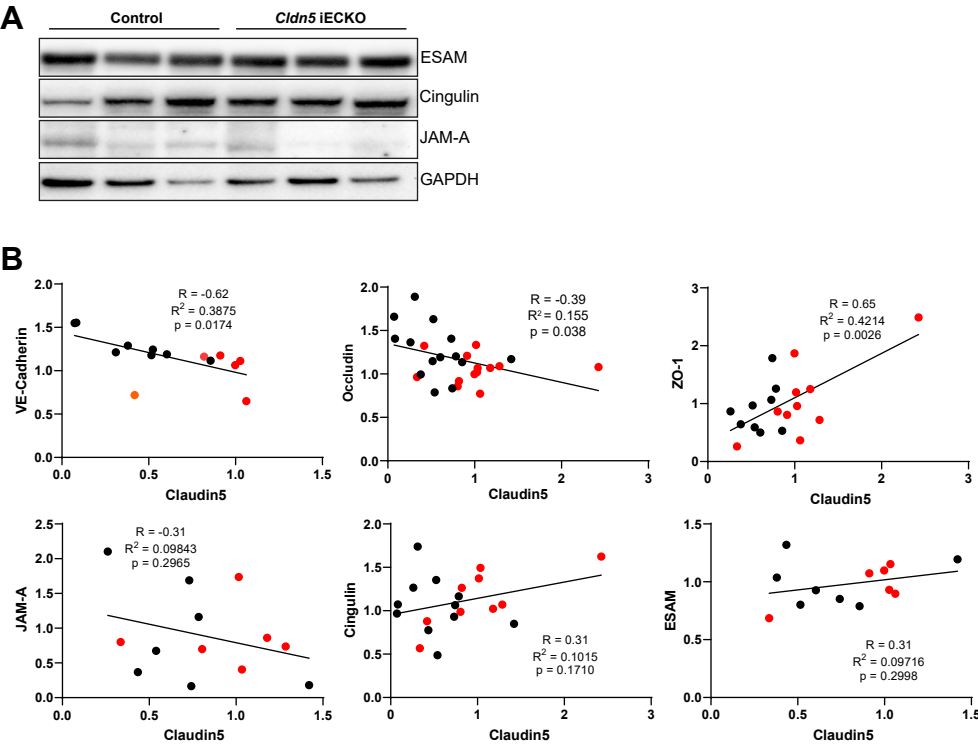

Supplement: supp [file elife-78517-supp-v1.zip › elife_poa_e78517_Figure_5_figure_supplement_1.pdf]
